# Supplementary material for: Machine Learning-Based Integration Identifies Plasma Cells-Related Gene Signature ST6GAL1 in Idiopathic Pulmonary Fibrosis and Its Pan-Cancer Analysis
Source: Research Square preprint supplement (doi:10.21203/rs.3.rs-3399609/v1), 2023-10-11
Supplement: Supplementary file 1 [file 578eae3efccb2240a035b8f9.docx]

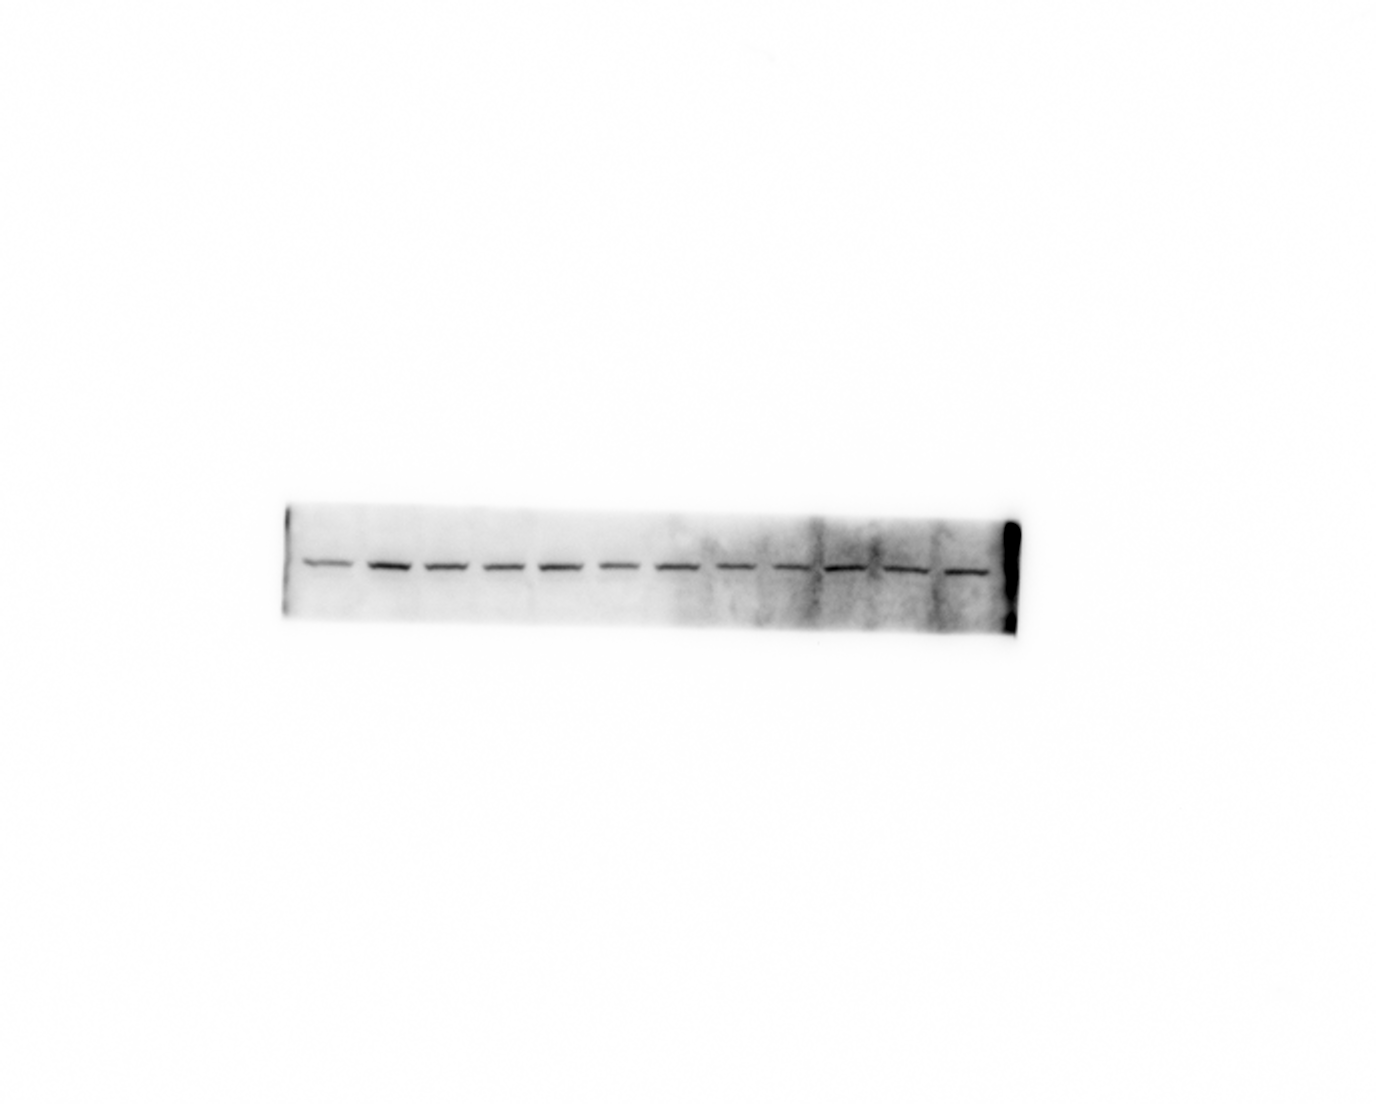


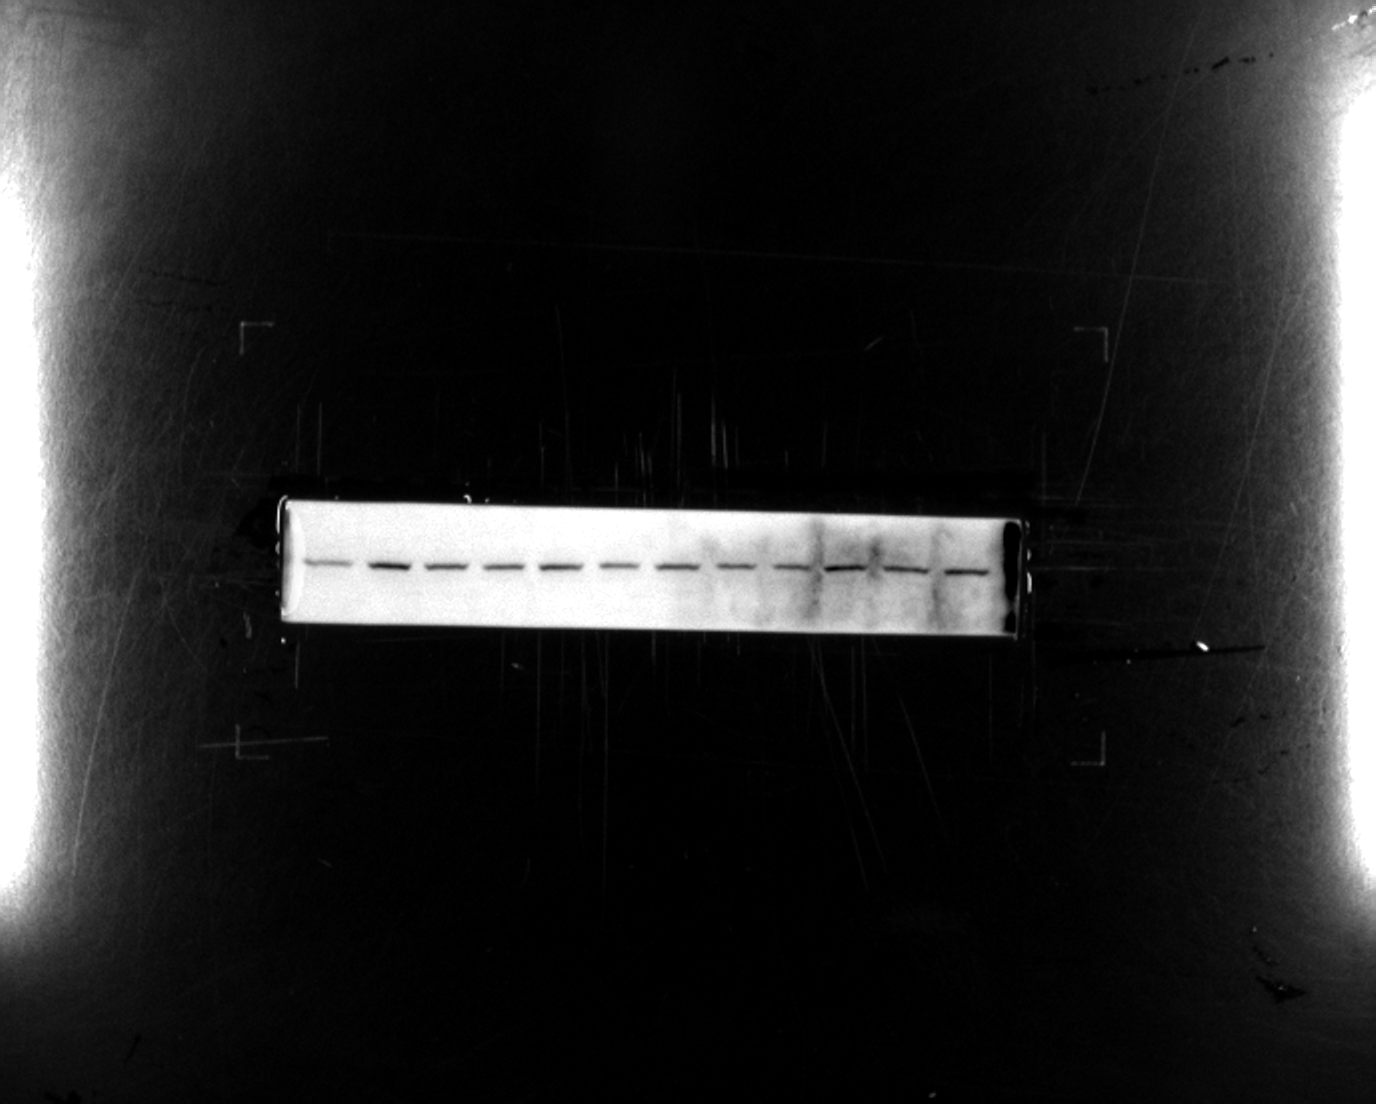


**Figure 7**. The entire original gel of St6gal1-manuscript in Figure 7B.


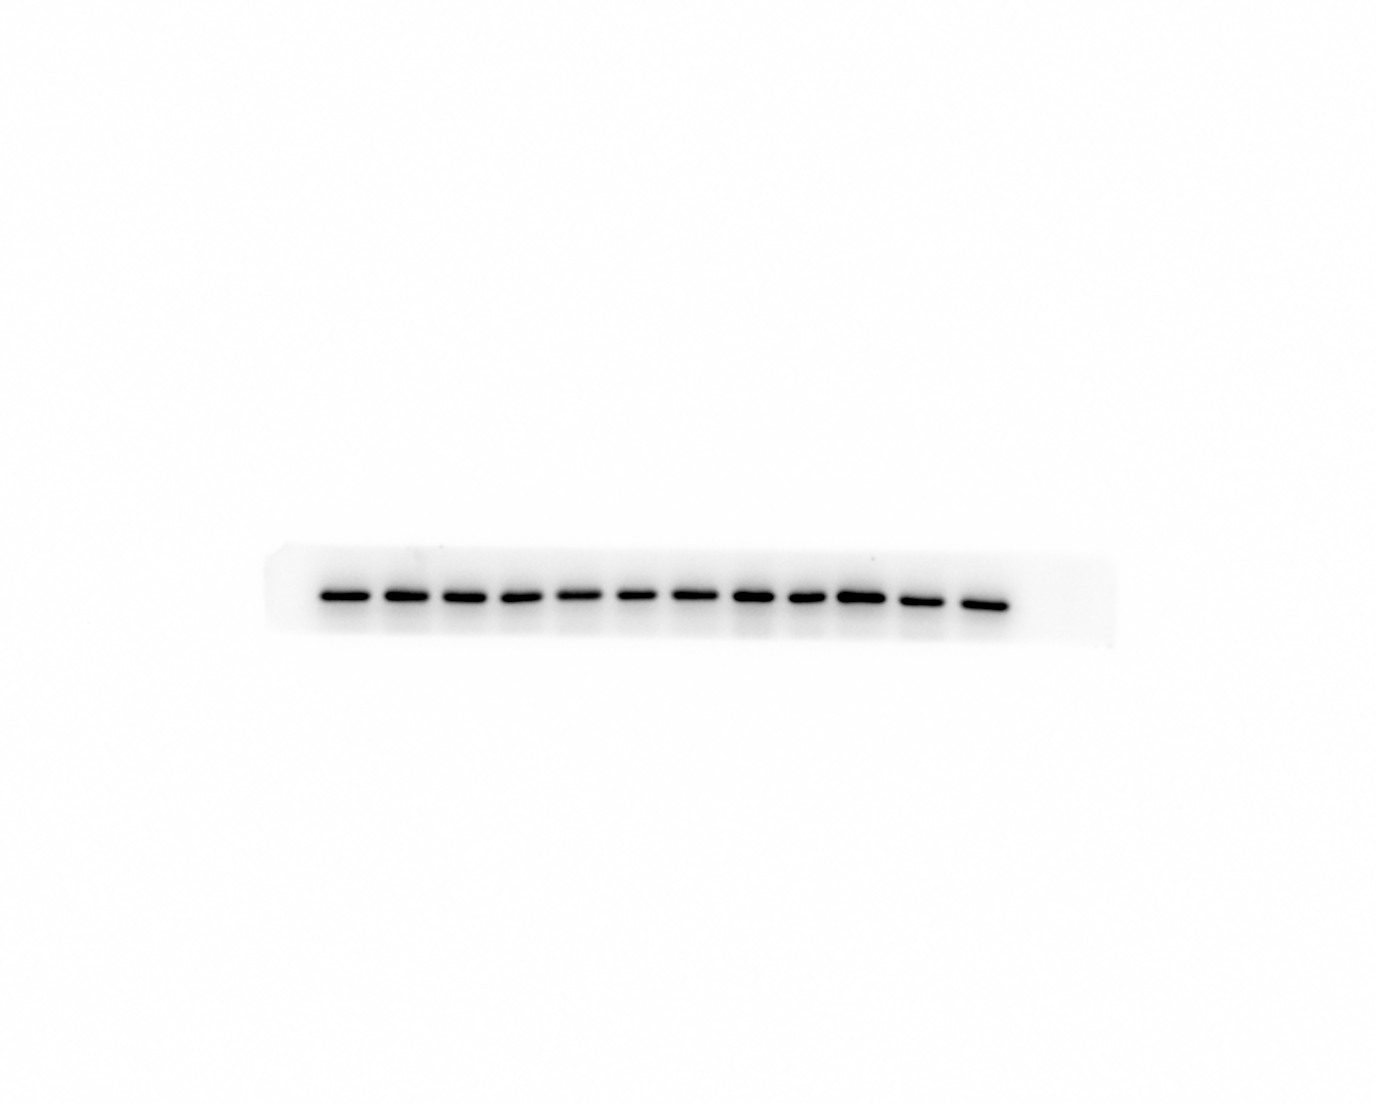


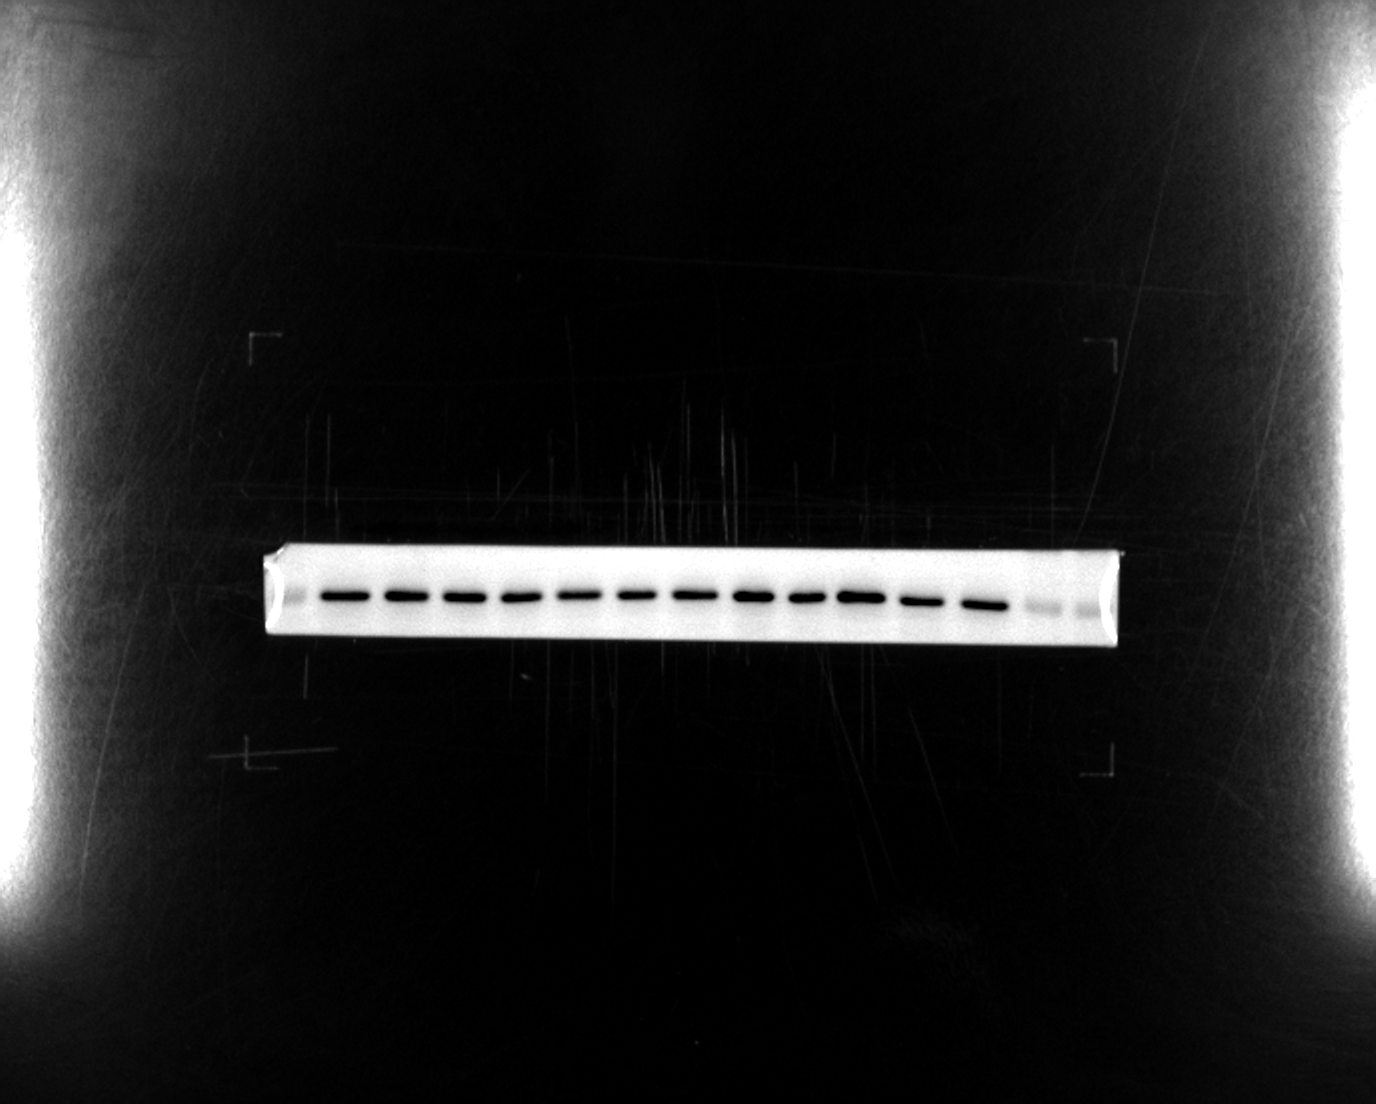


**Figure 7**. The entire original gel of Gapdh-manuscript in Figure 7B.


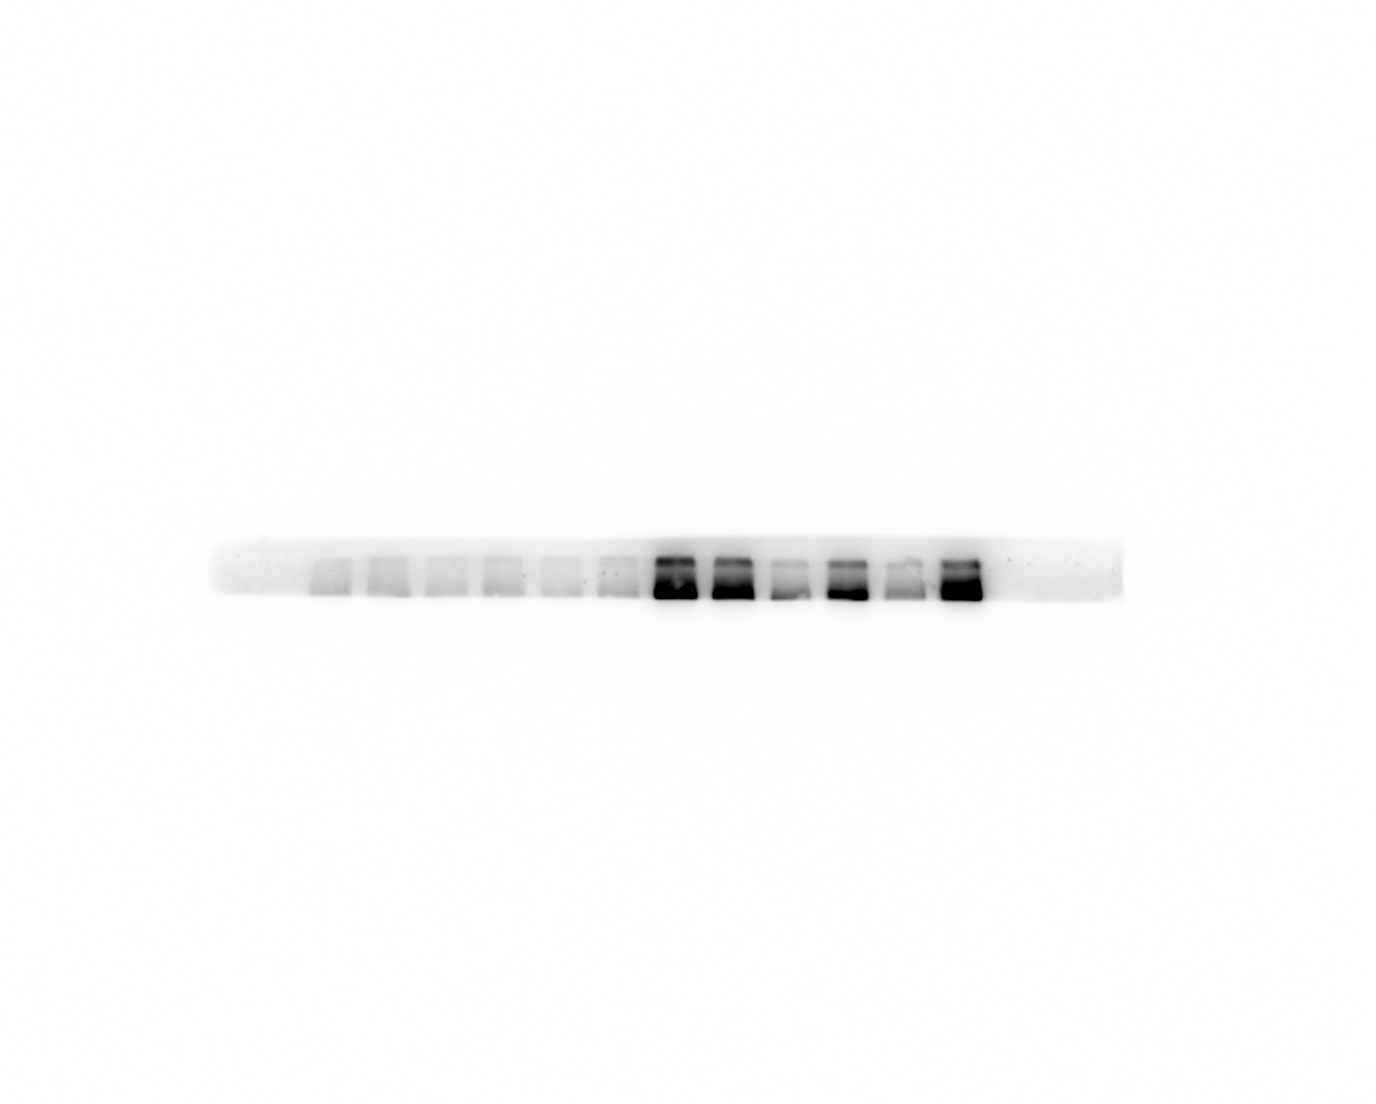


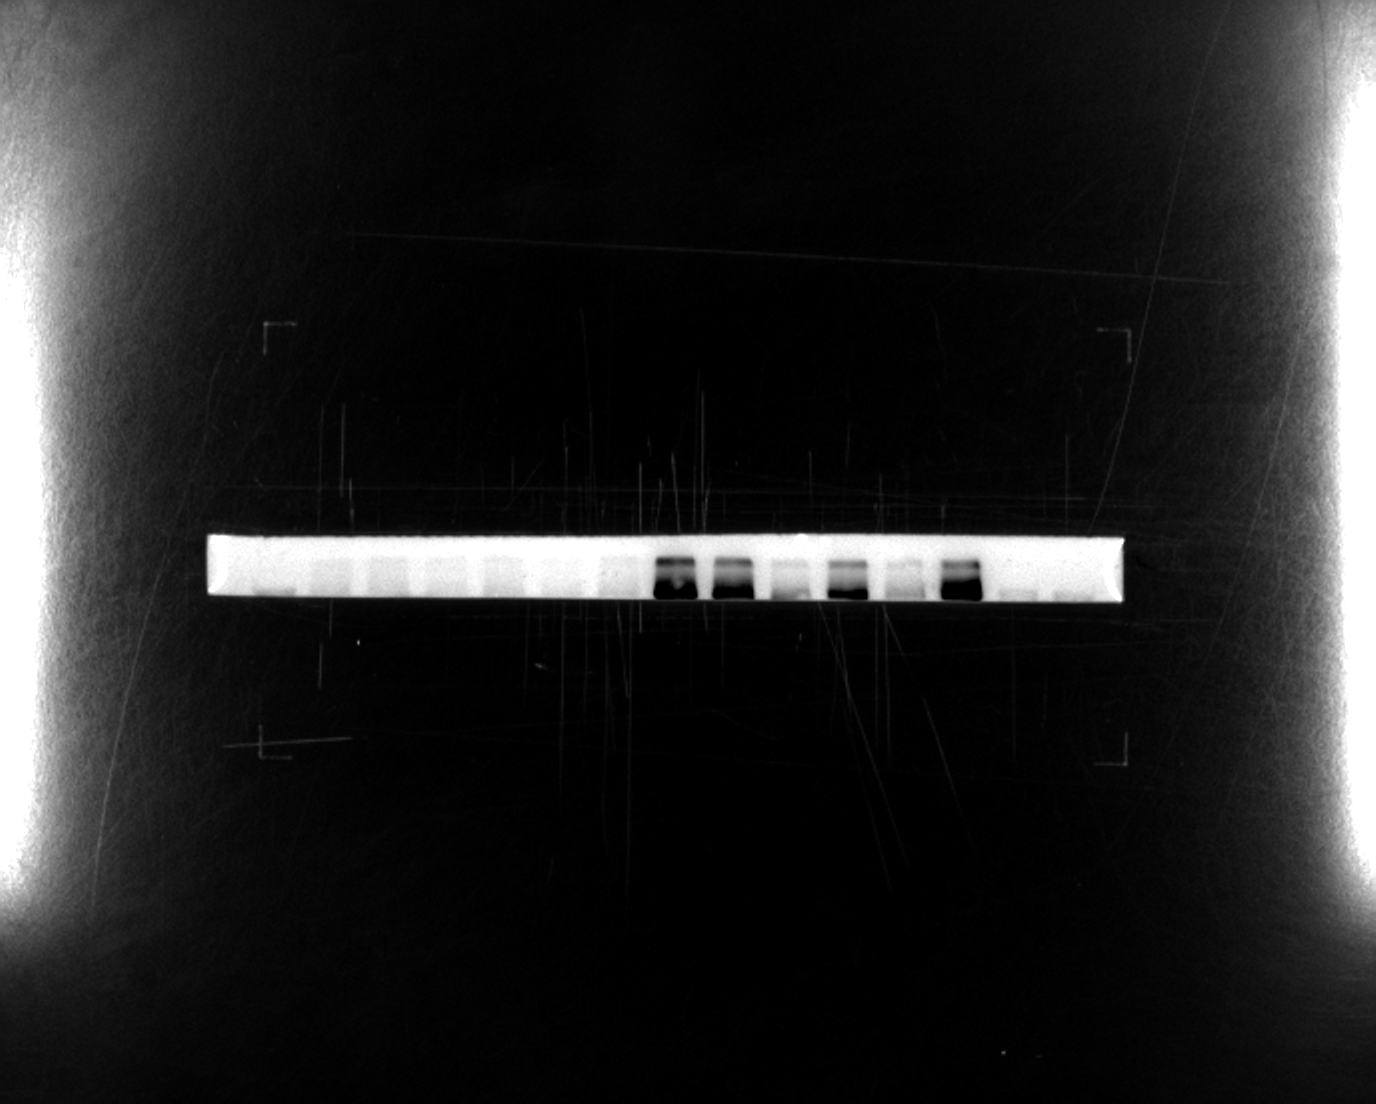


**Supplementary Figure 5**. The entire original gel of Fn1-manuscript in Supplementary Figure 5C.


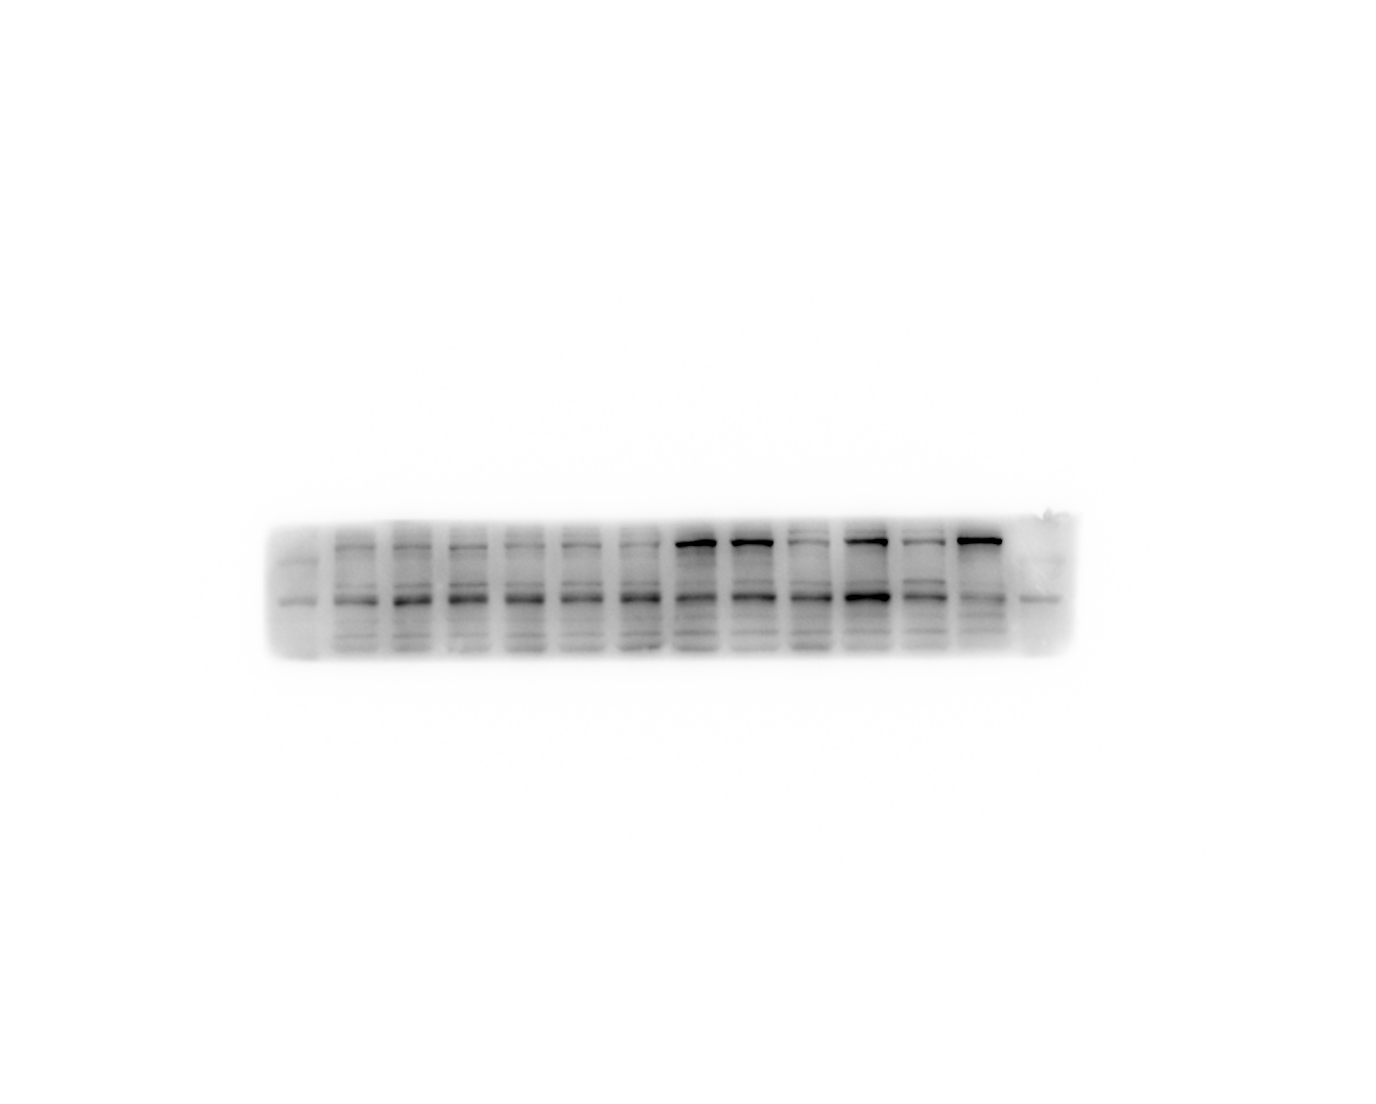


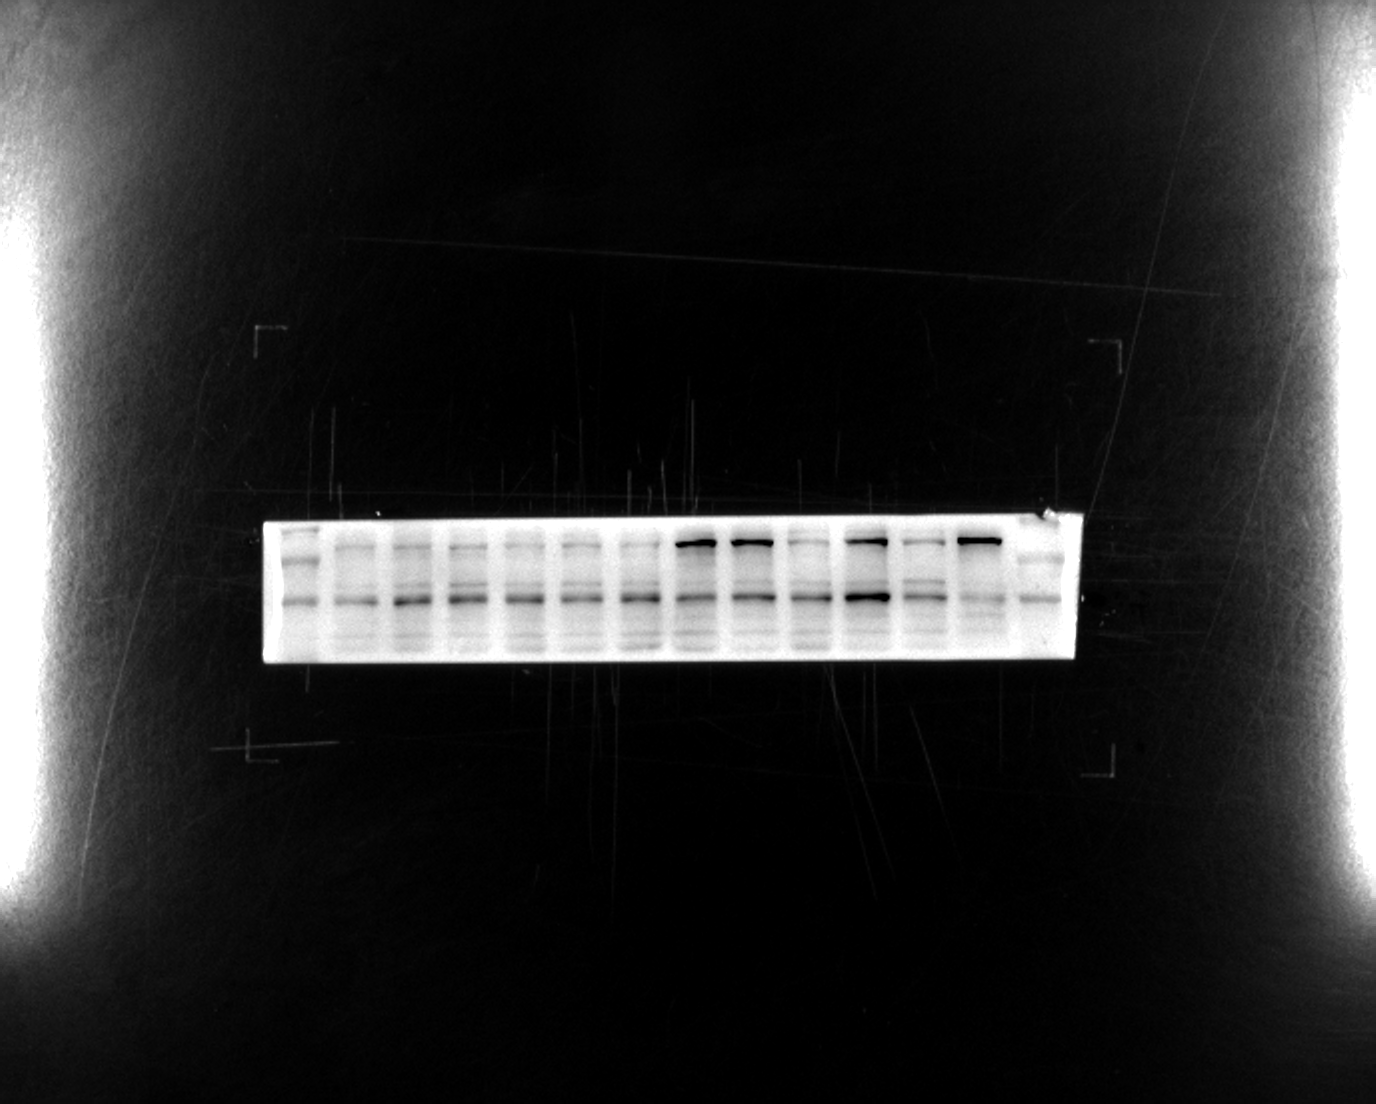


**Supplementary Figure 5**. The entire original gel of Col1a1-manuscript in Supplementary Figure 5C.


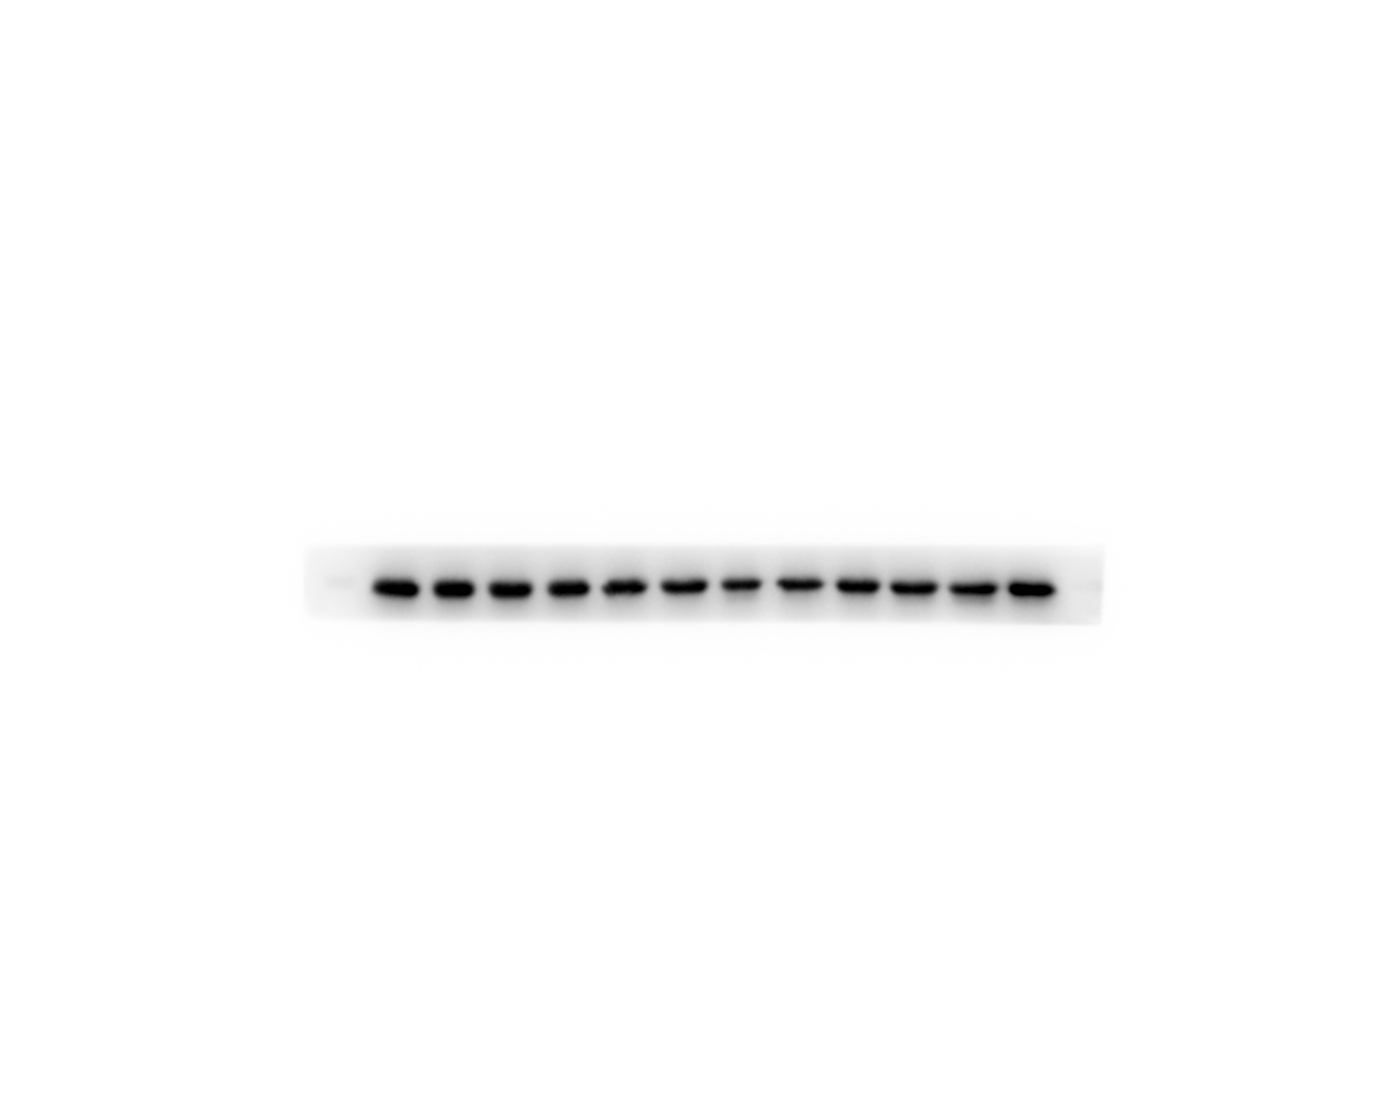


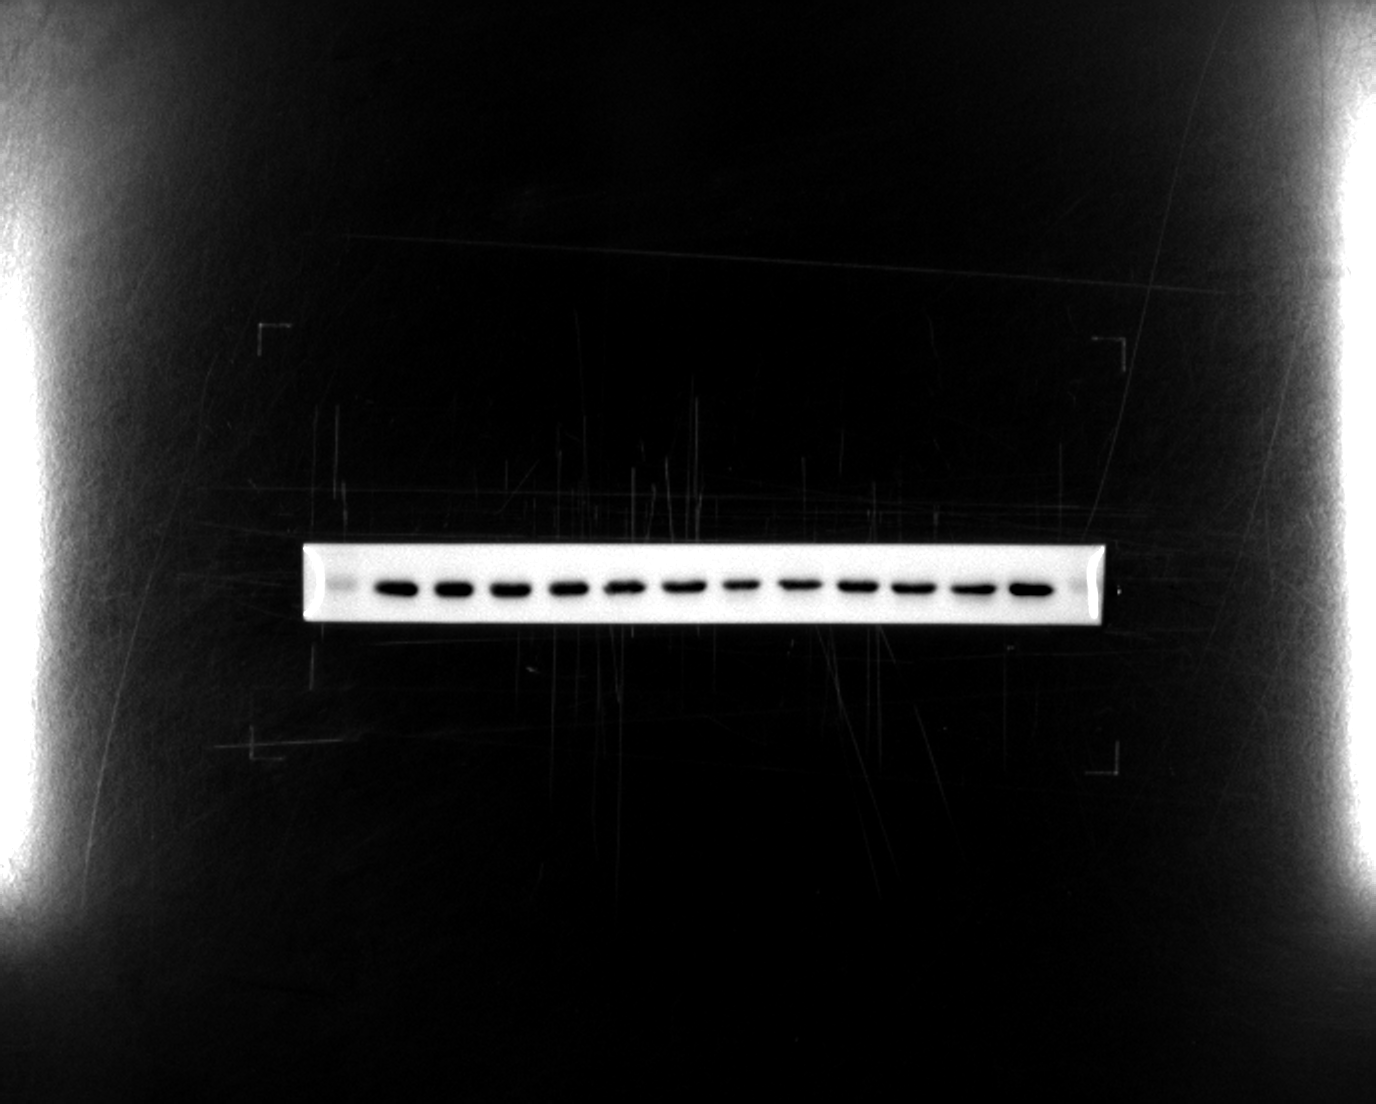


**Supplementary Figure 5**. The entire original gel of Gapdh-manuscript in Supplementary Figure 5C.
