# Supplementary material for: Machine Learning-Based Integration Identifies Plasma Cells-Related Gene Signature ST6GAL1 in Idiopathic Pulmonary Fibrosis and Its Pan-Cancer Analysis
Source: Research Square preprint supplement (doi:10.21203/rs.3.rs-3399609/v1), 2023-10-11
Supplement: Supplementary file 2 [file 6336df49e8f08a29b642a466.xlsx]

## Sheet: GSE70866-DEGs (IPF vs control)
Gene symbol	log2FC	AveExpr	t	B	P value	adjusted P value
CYTL1	2.14479	5.65649	7.55687	16.6108	5.96448e-12	1.20405e-07
FAM125B	-1.79078	10.0983	-7.19964	14.8277	3.99947e-11	4.03686e-07
ITGB3	2.6548	5.69975	6.82419	12.9924	2.83687e-10	1.4317e-06
CST6	1.75828	6.85971	6.70719	12.4294	5.17496e-10	1.68035e-06
PPBP	3.24929	11.3016	6.68399	12.3184	5.82676e-10	1.68035e-06
TCEA3	-1.74869	8.63712	-6.48116	11.3551	1.63061e-09	4.11464e-06
GABRE	-2.58256	6.4752	-6.4162	11.0497	2.25993e-09	4.91748e-06
TCF7L1	-1.71005	4.06417	-6.3779	10.8703	2.73746e-09	5.02373e-06
SPP1	3.057	10.7147	6.32639	10.63	3.53933e-09	5.59038e-06
CAMP	-1.57901	10.9367	-6.32297	10.6141	3.60008e-09	5.59038e-06
HIST1H2AI	1.27719	6.83549	6.16093	9.86486	8.02187e-09	1.04405e-05
ENPP3	-1.88771	4.91272	-6.1546	9.83582	8.27501e-09	1.04405e-05
MATK	1.54439	7.45548	6.08224	9.50477	1.17922e-08	1.32249e-05
RNASE3	1.38865	6.37375	6.01777	9.21163	1.61378e-08	1.56635e-05
AOC3	-1.8877	11.7057	-6.01658	9.20624	1.62311e-08	1.56635e-05
MYO1A	-1.18535	7.90019	-6.01578	9.20261	1.62943e-08	1.56635e-05
GFRA2	1.3843	9.63166	5.96095	8.95471	2.12466e-08	1.94957e-05
EPB41L5	-1.16817	3.74249	-5.90416	8.69927	2.79306e-08	2.38097e-05
SPRY2	1.48386	6.96391	5.82932	8.36475	3.99669e-08	2.91132e-05
SLC30A1	1.11572	8.18185	5.78912	8.18612	4.83982e-08	3.25671e-05
COL9A2	-1.15376	7.81162	-5.76676	8.08702	5.38207e-08	3.36603e-05
DLX3	-1.98993	3.09703	-5.76136	8.06312	5.52173e-08	3.36603e-05
SLITRK4	-1.26691	8.28532	-5.72014	7.8812	6.71069e-08	3.76302e-05
ZNF540	-1.25961	3.74641	-5.68448	7.72443	7.93898e-08	4.22239e-05
NALCN	-2.30744	5.88449	-5.68424	7.72334	7.94823e-08	4.22239e-05
EFCAB1	-1.52385	3.74434	-5.67688	7.69106	8.22813e-08	4.25901e-05
HIST1H1A	1.73183	6.72708	5.66755	7.65017	8.59702e-08	4.3387e-05
ARHGAP24	-1.35367	5.24284	-5.65085	7.57708	9.29801e-08	4.4858e-05
CXCR7	-1.46585	11.04	-5.64641	7.55768	9.49349e-08	4.4858e-05
UCK2	1.00204	7.11676	5.64503	7.55164	9.55513e-08	4.4858e-05
CD36	1.1852	11.0474	5.63735	7.5181	9.90518e-08	4.54445e-05
MURC	-1.83539	4.64339	-5.58355	7.28381	1.27356e-07	5.47006e-05
ZNF702P	-1.46445	3.66707	-5.57437	7.24397	1.32918e-07	5.59001e-05
C14orf34	1.94423	4.88871	5.54525	7.11789	1.52176e-07	6.26696e-05
VCAN	1.04569	10.2631	5.52747	7.04107	1.65255e-07	6.41822e-05
CYP3A5	-2.40613	4.78707	-5.52577	7.03374	1.66559e-07	6.41822e-05
CYP1B1	2.27451	7.99639	5.52326	7.02291	1.68507e-07	6.41822e-05
ABLIM3	1.3574	5.74131	5.48857	6.87357	1.97809e-07	7.26031e-05
KIAA0922	-1.0061	10.0451	-5.48429	6.85518	2.01753e-07	7.27285e-05
CYP3A7	-1.5522	5.53324	-5.41917	6.5765	2.72145e-07	9.20446e-05
PLA2G7	1.7504	9.8463	5.41162	6.54435	2.81709e-07	9.20446e-05
ARAP3	1.47214	8.00806	5.39911	6.49111	2.98293e-07	9.26405e-05
DLX4	-1.54976	5.95065	-5.38951	6.45029	3.11667e-07	9.44893e-05
LOC645206	-1.4176	3.50944	-5.38815	6.44451	3.13607e-07	9.44893e-05
LOC400043	-1.66084	7.04571	-5.37769	6.4001	3.28937e-07	9.66532e-05
RAB11FIP4	-1.06614	8.18919	-5.37358	6.38268	3.35153e-07	9.66532e-05
HIST1H1B	1.17408	8.40548	5.36487	6.34575	3.48721e-07	9.91497e-05
IQCA1	-1.43703	4.02034	-5.28052	5.9902	5.11069e-07	0.000132374
ACOX2	1.41468	4.85391	5.27651	5.97337	5.20402e-07	0.000132979
TIMP3	2.11674	5.25141	5.27251	5.95659	5.29876e-07	0.000133708
SFTPB	2.62245	8.63689	5.23663	5.80656	6.22675e-07	0.000150022
TMEM56	-1.28071	3.74814	-5.21881	5.73234	6.74443e-07	0.000158314
TMEM191C	-1.00358	3.32903	-5.21484	5.71581	6.86541e-07	0.000159084
SLC4A8	-1.06682	7.5244	-5.17029	5.53094	8.37678e-07	0.000178787
SLC16A10	1.17803	7.63351	5.16731	5.51863	8.48854e-07	0.000178787
LTC4S	1.15188	5.76785	5.16695	5.51713	8.50228e-07	0.000178787
NBEA	-1.24352	5.32673	-5.16235	5.49812	8.67803e-07	0.000180602
MMP7	2.50968	7.43483	5.15629	5.47306	8.91539e-07	0.000183648
HTRA1	1.99764	7.69077	5.14725	5.43575	9.2808e-07	0.000189244
ITIH5	-1.84955	6.03234	-5.12339	5.33747	1.03169e-06	0.000204183
ZNF589	-1.03714	7.76002	-5.11161	5.28905	1.08691e-06	0.000210735
FABP3	1.62006	9.84818	5.10451	5.25991	1.12157e-06	0.000213595
RNASE2	1.27169	7.62045	5.08042	5.16122	1.24738e-06	0.000233156
RBM11	-1.24562	4.02843	-5.07695	5.14701	1.26662e-06	0.000234451
TAC3	-1.19971	3.05143	-5.075	5.13905	1.27753e-06	0.000234451
MRC2	1.23371	9.23016	5.07094	5.12246	1.30057e-06	0.000234517
LRRC2	2.56224	7.19979	5.02693	4.94318	1.57778e-06	0.000267652
CPLX3	-1.34509	4.67248	-5.0139	4.89031	1.67032e-06	0.000278668
F13A1	1.50765	8.37051	5.00154	4.84024	1.76297e-06	0.000289342
DNAI2	-2.1246	4.94969	-4.98605	4.77758	1.8862e-06	0.000302197
EMP1	1.29982	12.3549	4.97767	4.74377	1.95625e-06	0.000305558
VSNL1	2.09741	4.83483	4.97691	4.74068	1.96279e-06	0.000305558
FFAR3	2.0908	5.45336	4.97457	4.73124	1.98286e-06	0.000305558
RSPH1	-1.6838	5.29497	-4.96816	4.7054	2.03893e-06	0.000311817
C8B	-1.9661	11.3363	-4.95304	4.64452	2.17731e-06	0.000324846
CPA3	1.64098	7.26396	4.94329	4.60534	2.27133e-06	0.000334681
SLC28A3	1.65734	6.20229	4.91282	4.48322	2.59124e-06	0.000368376
DMD	-1.89647	4.68322	-4.89773	4.42292	2.76551e-06	0.000385016
GBP7	-1.54017	4.47774	-4.87503	4.33246	3.04922e-06	0.00041591
RGL1	1.4688	7.54754	4.8154	4.09623	3.93554e-06	0.000496543
FCN1	1.15751	12.5162	4.81353	4.08885	3.96706e-06	0.000496982
HIST1H2AH	1.02988	11.5951	4.80137	4.04095	4.17778e-06	0.000505011
CDA	1.51713	7.51637	4.78622	3.98136	4.45571e-06	0.000532234
CLEC11A	1.0602	10.1115	4.78344	3.97043	4.50865e-06	0.000535389
KRT79	1.6665	6.15008	4.77207	3.92582	4.73142e-06	0.000555309
FAM47E	-1.19252	4.64674	-4.75968	3.87731	4.9862e-06	0.000581829
OR2A7	-1.05924	3.89844	-4.73474	3.77989	5.54019e-06	0.000614838
TPSAB1	1.8614	7.66933	4.73074	3.76427	5.63457e-06	0.000614838
MYO7B	-1.29122	6.1034	-4.70257	3.65472	6.34351e-06	0.000678089
FAM183A	-1.84342	4.92497	-4.70043	3.64645	6.40057e-06	0.000680044
PRRT4	-1.37116	7.13239	-4.67307	3.5405	7.17821e-06	0.000735566
C1orf194	-1.68782	4.77678	-4.67004	3.52881	7.26965e-06	0.000741174
GPR179	2.34871	5.87372	4.65391	3.46659	7.77615e-06	0.000777115
TPSD1	1.85713	7.27418	4.64919	3.44841	7.9308e-06	0.000784799
CD86	1.79621	10.144	4.64649	3.43802	8.02045e-06	0.000788901
LOC400891	-1.35062	3.35166	-4.62958	3.37306	8.60506e-06	0.000827192
HIST1H3B	1.29521	11.0035	4.62415	3.3522	8.80164e-06	0.000840225
SH3RF1	1.25523	5.47359	4.62354	3.34987	8.82388e-06	0.000840225
FCGR2B	1.07764	9.58603	4.61905	3.33266	8.98997e-06	0.000852022
PRRT2	-1.07157	4.25574	-4.59145	3.22712	1.0079e-05	0.000906864
ODF3L1	-1.25804	7.15657	-4.59046	3.22335	1.01203e-05	0.000906864
CES1	-1.06817	15.6606	-4.58623	3.20724	1.02985e-05	0.000915844
PID1	1.49322	5.63191	4.5551	3.08885	1.17087e-05	0.00101881
LOC100128252	-1.46194	4.58033	-4.54008	3.03195	1.2454e-05	0.0010744
FGFR1	1.2992	7.51029	4.53812	3.02451	1.25548e-05	0.00107765
ECM1	1.13333	6.41554	4.53624	3.01742	1.26518e-05	0.00107765
MERTK	1.84136	6.21289	4.52951	2.99196	1.30059e-05	0.00109442
FLJ46875	-1.08062	4.58596	-4.52941	2.99157	1.30114e-05	0.00109442
PRR4	-1.10118	6.91883	-4.5164	2.94247	1.37232e-05	0.0011495
GPT	1.75271	5.3132	4.50292	2.89169	1.45005e-05	0.00119036
SEPP1	1.447	8.55579	4.50283	2.89135	1.45058e-05	0.00119036
DLEC1	-1.2936	6.18128	-4.49436	2.85952	1.50156e-05	0.00120663
2022-09-04	-1.28197	6.22546	-4.49427	2.85918	1.50212e-05	0.00120663
STAB1	1.56867	7.3462	4.49334	2.85567	1.50785e-05	0.00120663
DLGAP3	1.00519	6.3694	4.47337	2.78079	1.63552e-05	0.0012797
PTGER3	-2.24292	5.69187	-4.46945	2.76612	1.66177e-05	0.00128039
SLC7A2	-1.0873	3.08724	-4.46362	2.74433	1.70156e-05	0.00130606
RNASE1	1.30177	12.9718	4.46209	2.7386	1.71218e-05	0.00130923
STARD13	1.08522	5.19335	4.44763	2.6846	1.81558e-05	0.00135745
TUBB3	2.17689	5.49813	4.43805	2.6489	1.88734e-05	0.0013905
SAMD12	-1.46023	3.75907	-4.43586	2.64076	1.90411e-05	0.00139775
LAMB1	-1.67696	8.60864	-4.43274	2.62914	1.9283e-05	0.00140529
LOC650293	-1.48007	3.86292	-4.42701	2.60786	1.9734e-05	0.00142364
P2RY2	1.13228	6.43665	4.42686	2.60728	1.97464e-05	0.00142364
CDC20	1.03352	7.32815	4.40286	2.5183	2.17509e-05	0.00149348
C20orf46	-1.17738	10.1138	-4.40083	2.51078	2.19294e-05	0.00150064
MAP9	-1.13385	4.06881	-4.39748	2.4984	2.22264e-05	0.00151582
FAM183B	-1.16165	4.16903	-4.39218	2.47881	2.27048e-05	0.00153292
SERPINI2	-1.16519	6.44825	-4.37753	2.42475	2.4079e-05	0.0015885
PLEKHA6	-1.47534	4.6464	-4.36898	2.39325	2.49181e-05	0.00162265
CNIH3	1.37653	5.53521	4.36748	2.38771	2.50685e-05	0.0016272
CEBPE	1.02676	9.39953	4.3664	2.38377	2.51761e-05	0.00162894
GDA	-1.17769	3.85104	-4.34691	2.31218	2.72149e-05	0.00172222
SOD3	1.7908	4.66744	4.34258	2.29631	2.76887e-05	0.00174128
SEC16B	-1.15032	4.93247	-4.33288	2.26079	2.87796e-05	0.00177603
CAPS2	-1.16981	5.04863	-4.32017	2.21435	3.02713e-05	0.00184063
CMKLR1	1.39144	9.82438	4.31459	2.19402	3.09486e-05	0.00187615
ITGB8	-1.09024	8.25376	-4.30629	2.16377	3.19848e-05	0.00191514
HS3ST1	1.26938	7.99974	4.29639	2.12776	3.32634e-05	0.001952
ZNF528	-1.09688	5.3985	-4.29335	2.11671	3.3666e-05	0.00195699
CH25H	1.3275	8.31536	4.28774	2.09634	3.44212e-05	0.00197859
CACNA1G	1.05604	4.02869	4.27582	2.05313	3.60796e-05	0.00205645
GSTA5	-1.72016	4.57707	-4.27175	2.03839	3.66633e-05	0.00206738
FBXO15	1.17447	6.86234	4.26845	2.02644	3.71439e-05	0.0020714
LARP6	-1.12732	4.14739	-4.25939	1.9937	3.84922e-05	0.00212307
TDRD10	1.03687	4.36927	4.25283	1.97003	3.94978e-05	0.00215498
DNAH5	-1.11196	3.59385	-4.25007	1.96006	3.99294e-05	0.00217266
BICC1	2.06786	4.41189	4.24371	1.93714	4.09391e-05	0.00220973
C9orf24	-1.16422	7.92481	-4.24027	1.92476	4.14953e-05	0.00222784
C9orf30-TMEFF1	-1.42464	6.21568	-4.2326	1.89717	4.2762e-05	0.00227167
MPO	1.4123	5.23321	4.22914	1.88475	4.33451e-05	0.00228227
RPA4	1.77197	7.76339	4.22874	1.8833	4.34136e-05	0.00228227
KIF19	-1.80187	4.48781	-4.22758	1.87915	4.36102e-05	0.00228665
DNAH12	-1.56284	4.28842	-4.22447	1.86797	4.41449e-05	0.00230362
OLIG1	1.84042	6.06129	4.20678	1.8046	4.73029e-05	0.00241748
GAL3ST4	1.06998	4.99554	4.19666	1.76841	4.92076e-05	0.00248338
ENHO	1.21871	6.8259	4.19324	1.75622	4.98661e-05	0.0025041
KLK11	-1.19183	3.57846	-4.19145	1.74984	5.02144e-05	0.00251533
LOC646498	-1.04865	3.6204	-4.16837	1.66766	5.49246e-05	0.00269772
ACSM1	-1.1302	5.67226	-4.15797	1.63074	5.71833e-05	0.00276825
RAB3IL1	1.31063	4.81402	4.15417	1.61725	5.80312e-05	0.00280258
DIAPH3	1.00497	5.92846	4.1516	1.60814	5.8611e-05	0.0028171
ARNT2	1.25101	4.92933	4.15065	1.6048	5.88251e-05	0.00282067
SPINK1	1.62552	7.47011	4.14473	1.58382	6.01881e-05	0.00286874
COL22A1	1.56625	4.49607	4.14449	1.58299	6.02427e-05	0.00286874
CCR3	1.52863	4.9875	4.13701	1.55656	6.20066e-05	0.00292459
ZNF609	-1.06397	7.57832	-4.12255	1.50555	6.55594e-05	0.00305591
GPRASP1	-1.06809	4.70349	-4.11603	1.48257	6.72254e-05	0.00309816
FCER2	1.04389	3.68395	4.11228	1.46937	6.82024e-05	0.003122
EPM2AIP1	-1.19598	4.57889	-4.09629	1.41324	7.25157e-05	0.00324824
C9orf140	1.12028	6.36566	4.0961	1.41257	7.25692e-05	0.00324824
SLC18A2	1.00074	4.00743	4.09197	1.39811	7.37248e-05	0.00327301
PPP1R13L	-1.11793	7.45866	-4.07968	1.35508	7.72756e-05	0.00337926
C9orf171	-1.57004	3.85753	-4.07947	1.35434	7.73377e-05	0.00337926
ASPHD1	1.43714	6.17637	4.07603	1.34235	7.83584e-05	0.00338982
ICOS	-1.02114	9.3531	-4.07567	1.34108	7.84678e-05	0.00338982
LIPN	1.0279	7.39825	4.0713	1.32584	7.9786e-05	0.00341237
STK31	-1.22296	3.33414	-4.06348	1.29856	8.2202e-05	0.00345711
PROM2	2.02903	6.0456	4.05737	1.27728	8.41376e-05	0.00350024
IBSP	1.71837	3.9941	4.05696	1.27586	8.42678e-05	0.00350024
DNAH2	-1.17999	5.16156	-4.05565	1.27131	8.46883e-05	0.00350515
PLXNC1	1.22701	5.61392	4.05498	1.26895	8.49071e-05	0.00350515
SNAI1	1.1223	5.46528	4.03646	1.20466	9.10945e-05	0.00372944
IGF1	-1.77225	7.2713	-4.03597	1.20296	9.1264e-05	0.00372944
ARGFXP2	-1.00198	3.79933	-4.03394	1.1959	9.19712e-05	0.00374148
GPR182	2.10792	5.4542	4.03353	1.19448	9.21146e-05	0.00374148
MAGI3	-1.0009	4.74217	-4.03129	1.18674	9.28985e-05	0.00376565
FAM8A1	-1.21503	5.8824	-4.01404	1.1271	9.91643e-05	0.00394061
DNAI1	-1.05582	3.76366	-4.01275	1.12266	9.96481e-05	0.00394431
ZDBF2	-1.332	3.19488	-4.00357	1.09099	0.000103164	0.00402819
RGL3	-1.02591	7.09274	-4.00069	1.08107	0.00010429	0.00406284
B3GNT8	1.41993	8.00791	3.99738	1.0697	0.000105598	0.00406284
FAM198B	1.01729	8.15822	3.99607	1.06519	0.000106121	0.00406284
HRASLS	-1.10098	6.49517	-3.97442	0.990868	0.000115121	0.00424855
DACH1	1.72096	4.9033	3.9624	0.949741	0.000120428	0.00438034
POLI	-1.04687	7.33336	-3.95847	0.936325	0.000122212	0.00442133
NT5DC2	1.61883	5.66755	3.95245	0.915765	0.000124998	0.00447902
VSTM1	1.79049	7.77463	3.94959	0.906035	0.000126339	0.004506
C17orf69	-1.02598	4.23334	-3.92267	0.814526	0.000139675	0.0048382
FRMPD1	-1.19923	3.75185	-3.92211	0.812623	0.000139967	0.0048382
EPHX2	-1.10235	3.88145	-3.91762	0.79741	0.000142322	0.00488562
DIRC3	1.20812	4.56235	3.9128	0.781084	0.000144895	0.00493253
FAM70A	-1.33063	5.36083	-3.91137	0.776268	0.000145662	0.00494838
KCNAB1	-1.38934	6.89277	-3.91103	0.775091	0.000145851	0.00494838
SHROOM3	-1.29221	5.3652	-3.90992	0.771353	0.00014645	0.00496038
C19orf51	-1.04741	3.9464	-3.88028	0.671431	0.000163427	0.00534701
CCDC151	-1.11946	5.84234	-3.87948	0.668739	0.000163911	0.00535417
GSTM2	-1.23294	5.88268	-3.87868	0.666043	0.000164397	0.00536137
TM4SF1	1.69301	6.23103	3.87675	0.659554	0.000165573	0.00536504
C20orf85	-1.53054	6.5501	-3.87547	0.655268	0.000166354	0.00538171
DIRAS1	1.43799	5.72456	3.87022	0.637637	0.000169607	0.00546324
CCDC37	-1.10565	3.23178	-3.86974	0.636022	0.000169908	0.00546324
MGC24103	1.3645	4.57807	3.86928	0.634495	0.000170193	0.00546324
ANK3	-1.19051	4.7094	-3.86707	0.627065	0.000171588	0.0054771
TPBG	-1.12083	4.63134	-3.85635	0.59117	0.000178489	0.00562344
MMP10	1.79491	4.54033	3.85571	0.589027	0.00017891	0.00562344
KCTD15	1.04794	4.40773	3.85216	0.577159	0.000181258	0.00563799
DYNLRB2	-1.65288	4.5789	-3.84224	0.544058	0.000187973	0.00580216
SLC40A1	1.18333	7.72858	3.83286	0.512788	0.000194547	0.00593825
NEIL1	-1.02254	8.10135	-3.83085	0.506084	0.000195986	0.00595838
SDS	1.43232	7.92045	3.82766	0.495498	0.00019828	0.00601907
MALL	1.37647	5.37222	3.82108	0.473624	0.000203107	0.00608326
KLF12	-1.16877	5.74045	-3.81313	0.447244	0.000209086	0.00620715
BEST4	-1.33271	5.72871	-3.80447	0.418562	0.000215788	0.00632237
MS4A8B	-1.34401	3.49913	-3.78969	0.36973	0.0002277	0.00655716
AQP4	1.943	4.86021	3.77818	0.331791	0.00023741	0.00675964
SPEN	1.44334	9.47943	3.77268	0.31371	0.000242183	0.00683888
TSPAN9	-1.29055	2.78462	-3.77149	0.309798	0.000243228	0.00683888
ATP9A	1.13764	8.52093	3.76407	0.285424	0.000249845	0.00695672
PBK	1.19447	6.7834	3.75844	0.26695	0.000254981	0.00704144
TJP1	-1.10056	5.27791	-3.75596	0.258841	0.000257268	0.00704606
SFTPC	1.51398	10.5135	3.74926	0.236893	0.000263564	0.00716093
MAL	-1.11753	6.34764	-3.74641	0.227578	0.000266283	0.00720228
RIPK4	-1.20204	4.52302	-3.74617	0.226794	0.000266513	0.00720228
SPTB	1.106	4.07421	3.74264	0.215266	0.00026992	0.00727487
CYP19A1	1.18649	4.27421	3.74129	0.210874	0.000271229	0.007281
OR13H1	1.26734	3.86502	3.73954	0.205151	0.000272945	0.00728829
HKR1	-1.01694	7.17852	-3.73699	0.196825	0.000275461	0.0073376
AURKB	1.20042	5.78696	3.73503	0.190445	0.000277405	0.00736838
MFAP3L	-1.04026	3.65556	-3.73299	0.183776	0.000279451	0.00741299
STEAP4	1.52542	4.4708	3.69924	0.0741825	0.000315348	0.00799321
VEGFA	1.09668	7.98988	3.68791	0.0375643	0.000328349	0.00823403
KRT14	1.30266	4.0373	3.68513	0.0285726	0.000331624	0.00825726
ENPP5	-1.08539	5.68217	-3.68511	0.0285202	0.000331643	0.00825726
ZNF239	-1.06682	3.35759	-3.68058	0.0139006	0.000337038	0.0083482
ARMC3	-1.3396	3.6428	-3.67757	0.00420449	0.000340664	0.00838657
LEPREL1	1.09317	7.05313	3.66303	-0.0425289	0.000358703	0.00870586
RGS2	1.04474	10.2376	3.66107	-0.0488179	0.000361203	0.00870586
TEKT2	-1.14448	4.68254	-3.65991	-0.0525395	0.00036269	0.00870586
FNDC5	1.70726	5.39766	3.65876	-0.0562521	0.000364181	0.00870779
KCNRG	-1.0057	4.00596	-3.65695	-0.0620419	0.000366517	0.00873178
CSPG4	-1.13294	7.24613	-3.65693	-0.062096	0.000366539	0.00873178
IFT81	-1.00675	5.69501	-3.65506	-0.0681056	0.00036898	0.00875374
CHRNA3	-1.16082	4.95193	-3.65503	-0.0682078	0.000369021	0.00875374
LOC730202	-1.20146	3.6566	-3.64945	-0.0860522	0.000376368	0.0088655
IL1R2	1.8411	6.2488	3.64257	-0.108086	0.000385642	0.00902081
NHS	-1.00394	4.28354	-3.63636	-0.127902	0.00039418	0.00915686
TMEM200A	-1.4005	4.5279	-3.63369	-0.136414	0.000397906	0.00923278
C2orf40	-1.46949	3.75619	-3.63063	-0.146184	0.000402226	0.00928273
CXCL5	1.03818	12.9342	3.6269	-0.158062	0.000407541	0.00933282
LYPD5	-1.10104	8.1577	-3.62475	-0.164896	0.000410632	0.00936659
MYH7B	-1.44648	4.79218	-3.61868	-0.184211	0.000419495	0.00950362
DNAH9	-1.59935	3.85802	-3.61838	-0.185158	0.000419935	0.00950362
REP15	1.71377	4.3618	3.61725	-0.188774	0.000421617	0.00951791
ELN	1.18375	5.78954	3.61247	-0.203946	0.000428751	0.00961008
LOC100131289	-1.1129	4.39602	-3.58885	-0.278707	0.000465719	0.010219
HDC	1.27971	6.66881	3.57966	-0.307716	0.000480915	0.0104727
WDR16	-1.12534	3.67046	-3.57775	-0.313705	0.000484115	0.0105311
TNFRSF25	-1.41605	8.40156	-3.56564	-0.351791	0.000504967	0.0108214
P2RY12	1.14865	6.42165	3.56202	-0.363177	0.000511374	0.0109124
HRK	1.2697	4.89588	3.55881	-0.373243	0.000517108	0.0109767
CD40LG	-1.75011	6.86013	-3.52973	-0.464126	0.000571901	0.0117598
SLC24A3	1.1017	4.18499	3.52881	-0.466977	0.000573712	0.0117686
PGAP1	-1.23047	4.08057	-3.51727	-0.502881	0.000597015	0.0120433
BEX5	-1.16593	4.79738	-3.51719	-0.503133	0.000597182	0.0120433
MRVI1	1.50653	5.39345	3.51432	-0.512018	0.000603096	0.0121021
C17orf72	-1.19554	4.2262	-3.50868	-0.529539	0.000614932	0.012289
MORN5	-1.07017	3.50159	-3.50199	-0.550241	0.000629221	0.0124652
PRKAR1B	1.21338	7.40468	3.49633	-0.567754	0.000641569	0.0126134
ANGPTL4	1.30997	4.83403	3.49574	-0.569557	0.000642854	0.0126238
SPTLC3	1.1421	4.14228	3.47957	-0.619441	0.00067946	0.0130755
CCL7	1.56286	7.25455	3.47184	-0.643213	0.000697637	0.0133237
PMAIP1	1.0123	7.57715	3.47035	-0.647794	0.000701196	0.0133791
FOXJ1	-1.12158	4.31629	-3.46966	-0.649919	0.000702853	0.013398
KLHL10	-1.11183	4.51582	-3.4649	-0.664519	0.000714346	0.0135404
KCNG1	1.00971	4.90927	3.46398	-0.667338	0.000716586	0.0135574
LRG1	1.00297	7.42968	3.45039	-0.708956	0.000750506	0.0140023
ZMAT3	-1.10999	5.3744	-3.43836	-0.745673	0.000781776	0.0143351
SPC25	1.20999	7.41898	3.43667	-0.75083	0.000786272	0.0143825
LOC643037	-1.2887	4.25745	-3.43656	-0.751158	0.000786559	0.0143825
KIT	1.11982	4.92961	3.42972	-0.77197	0.000804977	0.0146265
CXCL9	-1.65001	9.68044	-3.42675	-0.781005	0.000813107	0.0146949
CCL2	1.50961	11.8811	3.42542	-0.785058	0.000816782	0.0147184
SOX2	-1.46385	3.60752	-3.41868	-0.805516	0.000835586	0.0149142
S100A12	1.90976	7.21992	3.41399	-0.81972	0.000848898	0.0150586
ADM	1.18506	8.64471	3.41092	-0.829034	0.000857744	0.0150962
S1PR3	1.15278	3.91764	3.40253	-0.854403	0.000882313	0.0153948
SERPINB3	-1.49532	4.58355	-3.40252	-0.854429	0.000882338	0.0153948
TTC25	-1.08716	5.18324	-3.39488	-0.877504	0.000905301	0.0156601
NRN1L	-1.09736	5.77987	-3.39333	-0.882175	0.000910023	0.0157148
BCAS1	-1.07393	3.82794	-3.39134	-0.888157	0.000916106	0.0157929
MS4A2	1.17842	4.87188	3.38959	-0.893452	0.000921525	0.0158592
BCR	1.15904	7.86314	3.38695	-0.901374	0.000929693	0.0159725
CAPN11	-1.37644	3.908	-3.38385	-0.910707	0.000939409	0.0160247
TNNT1	-1.0553	8.83232	-3.37859	-0.926541	0.000956129	0.0162223
IER3	1.16612	10.7805	3.37128	-0.948471	0.000979784	0.0164824
LDLRAD1	-1.47401	4.29105	-3.3662	-0.963683	0.000996539	0.0166345
FAM81B	-1.20183	4.40365	-3.3478	-1.01867	0.00105955	0.017323
TMEM190	-1.13428	5.55627	-3.3455	-1.0255	0.00106766	0.0174095
OR8G5	1.39251	3.74339	3.34358	-1.03125	0.00107453	0.0174595
CYP2F1	-1.39084	5.1919	-3.33948	-1.04345	0.00108926	0.0175489
TPST1	1.81225	5.28995	3.33917	-1.04437	0.00109037	0.0175529
SHOX2	1.01838	3.98502	3.33869	-1.04578	0.00109209	0.0175665
CXCL14	1.41902	4.33551	3.32746	-1.07913	0.0011335	0.0179467
DEFA3	1.94251	6.9832	3.31877	-1.10487	0.00116655	0.0182411
F2RL1	1.30607	4.17242	3.31753	-1.10856	0.00117137	0.0182727
SERPINB4	-1.21612	4.47948	-3.31338	-1.12082	0.00118751	0.0184119
LEF1	-1.43119	5.44122	-3.31102	-1.1278	0.00119681	0.0185134
PIGR	-1.61089	6.56697	-3.3048	-1.14613	0.00122158	0.0187243
C4orf38	-1.07483	5.06556	-3.29916	-1.16277	0.0012445	0.0189893
DFNB59	-1.09398	4.64426	-3.29533	-1.17404	0.00126028	0.0191
RBM44	-1.16815	3.65886	-3.29222	-1.18319	0.00127322	0.0192097
LRRC49	-1.2203	4.61833	-3.28963	-1.1908	0.00128411	0.0193441
CCDC114	-1.15948	4.20605	-3.2839	-1.20761	0.00130846	0.0196094
ZNF347	-1.09138	5.78384	-3.26214	-1.27125	0.00140501	0.0205231
EHD2	1.46223	5.25158	3.25499	-1.29208	0.00143815	0.0208413
TMEM169	-1.069	3.26022	-3.24677	-1.31599	0.00147717	0.0211486
CCL13	1.14213	9.58649	3.22872	-1.36829	0.00156629	0.0220032
AANAT	1.5239	3.90973	3.2203	-1.39261	0.00160957	0.0223714
TC2N	-1.01415	3.93051	-3.20739	-1.42979	0.00167808	0.0229198
LGMN	1.11945	10.1525	3.18644	-1.48985	0.00179505	0.0239344
FOLR3	-1.03415	10.2915	-3.17813	-1.51359	0.00184355	0.0244037
C10orf35	-1.00846	8.56574	-3.17492	-1.52274	0.00186257	0.0245911
NPAS2	1.02887	4.05078	3.16778	-1.54308	0.00190562	0.0249959
ENKUR	-1.29525	3.66414	-3.16332	-1.55576	0.00193296	0.0251909
C10orf116	1.05959	6.752	3.15655	-1.57498	0.00197516	0.025543
DSP	-1.04678	4.21437	-3.14889	-1.59667	0.00202391	0.0259573
LOC728218	-1.0375	3.79925	-3.14669	-1.6029	0.00203814	0.0260404
LOC284263	1.03061	3.86962	3.14509	-1.60742	0.00204852	0.0260905
HOXC4	-1.03542	5.50636	-3.14401	-1.61048	0.00205557	0.0261201
CLDN18	1.25415	4.02237	3.11435	-1.69398	0.00225805	0.0276274
NRAP	1.36916	4.43335	3.11149	-1.70198	0.00227849	0.0277891
KRT17	1.08625	3.73676	3.11005	-1.706	0.00228884	0.0278678
CCDC74B	-1.16961	3.92329	-3.10675	-1.71524	0.00231277	0.0280502
MYL9	1.10335	5.7655	3.10641	-1.71621	0.00231531	0.0280502
UBD	-1.41711	8.09757	-3.08899	-1.76482	0.00244564	0.0290584
SYNE2	-1.09865	6.81478	-3.08553	-1.77443	0.0024723	0.0292718
ABLIM2	-1.14667	4.26578	-3.08083	-1.7875	0.00250898	0.0294671
PM20D1	-1.07141	4.92673	-3.07461	-1.80477	0.00255834	0.0298836
LOC283392	-1.01458	6.98755	-3.06961	-1.81861	0.00259858	0.0302174
OR52E8	1.02746	3.34869	3.06886	-1.8207	0.00260473	0.0302715
CLC	1.31712	7.69898	3.06524	-1.8307	0.00263428	0.0305324
TFPI	1.50996	4.16034	3.04876	-1.87618	0.00277304	0.0315733
WNT2B	1.61708	4.45827	3.04193	-1.89496	0.0028325	0.0320225
AQP2	1.04438	3.97879	3.03129	-1.92415	0.00292746	0.0327586
TMEM130	-1.01374	3.62923	-3.02868	-1.93128	0.00295116	0.0328799
CHP2	-1.06366	4.00364	-3.01842	-1.95934	0.00304627	0.0335488
SFTPD	1.07801	5.19813	3.01538	-1.96763	0.00307497	0.0337568
ADORA3	1.18799	6.60424	2.99256	-2.02964	0.00329848	0.0355506
SCGB1A1	-1.24491	9.80955	-2.98408	-2.05259	0.00338532	0.0361394
KLHL34	1.14965	4.28527	2.97768	-2.06987	0.00345226	0.0366215
GAS6	1.11054	5.63301	2.96912	-2.0929	0.00354356	0.0371412
XCL1	-1.18949	6.38585	-2.95721	-2.12491	0.00367451	0.037885
PDE6H	-1.09583	4.25641	-2.95471	-2.1316	0.0037025	0.038095
HRASLS2	-1.05586	4.141	-2.94718	-2.15174	0.00378808	0.0386212
PRSS8	1.22162	6.54187	2.94099	-2.16828	0.00385986	0.0390613
DCDC2B	-1.19571	4.37802	-2.90629	-2.26037	0.00428558	0.0419762
MIAT	-1.20453	5.8931	-2.90405	-2.26628	0.00431447	0.0420958
HIST2H3A	1.023	10.1784	2.89914	-2.27922	0.00437847	0.0424127
PRB4	-1.04597	6.4826	-2.89197	-2.29811	0.00447359	0.0429835
C16orf45	1.00281	4.88402	2.87447	-2.34399	0.00471347	0.0445255
ZNF541	-1.0162	4.06571	-2.87354	-2.34642	0.00472656	0.0446073
LOC439949	-1.05653	6.57676	-2.86824	-2.36025	0.00480161	0.0451047
CYR61	1.17907	4.17899	2.85474	-2.39542	0.00499799	0.0464155
NRG1	1.18359	3.93148	2.83801	-2.43879	0.00525153	0.0478151
MUC21	1.01072	3.24401	2.82259	-2.47857	0.00549551	0.0492619
CLGN	1.28718	4.66045	2.81973	-2.48592	0.00554189	0.0495677
C22orf32	-1.0628	3.90382	-2.81827	-2.48969	0.0055658	0.0497374

## Sheet: GSE150910-DEGs (IPF vs control)
Gene symbol	baseMean	log2FC	lfcSE	stat	P value	adjusted P value
CFH	5842.41	1.29964	0.0772468	16.8245	1.61554e-63	2.00909e-60
HS3ST1	83.4689	1.17612	0.176953	6.6465	3.00143e-11	2.41123e-10
AOC1	47.394	1.55789	0.121661	12.8051	1.53459e-37	1.70395e-35
HECW1	15.2689	1.02077	0.155175	6.57821	4.76157e-11	3.71642e-10
KLHL13	152.487	1.61717	0.127365	12.6971	6.13335e-37	6.5378e-35
POLDIP2	9.66325	-1.34315	0.558232	-2.40608	0.0161248	0.0328232
CD38	156.288	1.44705	0.146574	9.87253	5.47655e-23	1.52023e-21
ZMYND10	3028.15	1.62901	0.240357	6.77746	1.22305e-11	1.03421e-10
CALCR	2.69316	-1.49081	0.325806	-4.57576	4.74501e-06	1.8654e-05
MEOX1	115.114	2.90407	0.224174	12.9545	2.21493e-38	2.63167e-36
PRKAR2B	4.63444	-1.26207	0.514093	-2.45495	0.0140905	0.0290725
MPO	87.8339	-1.4369	0.192112	-7.47949	7.46098e-14	8.36904e-13
ABCB4	24.6171	1.15167	0.164607	6.99648	2.62469e-12	2.43466e-11
ITGA2B	117.561	-1.40339	0.147852	-9.49185	2.26967e-21	5.46301e-20
CRLF1	1674.21	2.10456	0.155293	13.5521	7.69527e-42	1.2165e-39
TAC1	23.4884	1.1205	0.372465	3.00833	0.00262689	0.00646636
CACNA1G	25.4133	1.56791	0.137067	11.4389	2.67111e-30	1.42363e-28
USH1C	61.2876	1.96786	0.241062	8.16329	3.26027e-16	4.76624e-15
PROM1	671.338	2.51422	0.265301	9.47687	2.62021e-21	6.25831e-20
NOS2	62.3391	-1.88622	0.176685	-10.6756	1.32361e-26	5.1654e-25
DNAH9	586.365	1.77693	0.248419	7.15295	8.49333e-13	8.39611e-12
SLC13A2	14.8492	-1.6857	0.272704	-6.18143	6.35221e-10	4.31201e-09
CEACAM7	6.89428	1.60693	0.201229	7.98558	1.39866e-15	1.92409e-14
CD79B	604.797	1.56281	0.126158	12.3877	3.04542e-35	2.65464e-33
TKTL1	34.0552	-1.29238	0.185309	-6.97416	3.07695e-12	2.82607e-11
CACNA2D2	2273.01	-1.36878	0.145535	-9.40518	5.19401e-21	1.21263e-19
TFAP2B	1.88787	1.96513	0.496673	3.95658	7.60307e-05	0.000244446
DLEC1	766.299	1.56483	0.214108	7.30862	2.69908e-13	2.83494e-12
HHATL	150.501	1.78855	0.227917	7.84737	4.24844e-15	5.54199e-14
SEMA3G	1198.44	-1.35876	0.155837	-8.71915	2.80306e-18	5.04227e-17
FMO1	194.095	1.45136	0.199457	7.27657	3.42414e-13	3.55843e-12
ABHD5	38.2439	-1.23618	0.159507	-7.75002	9.18817e-15	1.15341e-13
LTF	1977.84	1.89219	0.216688	8.73236	2.4942e-18	4.5084e-17
NR1H4	6.8488	-1.05847	0.191489	-5.52756	3.2471e-08	1.73607e-07
DPEP1	138.351	2.46527	0.177107	13.9197	4.81024e-44	8.71167e-42
CLCA4	14.8477	2.60285	0.265724	9.7953	1.17945e-22	3.16568e-21
IGF1	802.491	1.96658	0.14894	13.2038	8.3403e-40	1.12739e-37
ATP1A2	527.188	1.01607	0.157135	6.46625	1.00464e-10	7.53842e-10
CYP24A1	275.86	3.53643	0.307602	11.4968	1.36966e-30	7.4057e-29
C8B	121.112	-1.61239	0.231927	-6.95213	3.59812e-12	3.27571e-11
HSD17B6	1904.22	-1.80123	0.132507	-13.5935	4.3787e-42	6.98123e-40
KCNG1	8.92184	1.15156	0.169511	6.7934	1.09517e-11	9.33274e-11
SLAMF7	370.796	1.21572	0.149165	8.15016	3.63429e-16	5.28815e-15
ARNTL2	207.762	1.1442	0.118101	9.68828	3.38166e-22	8.66504e-21
HMGB3	806.988	1.20055	0.112022	10.7171	8.45869e-27	3.3572e-25
EFCAB1	958.53	1.6583	0.249177	6.65511	2.8308e-11	2.28103e-10
DAPK2	1384.34	-1.62649	0.103426	-15.7261	1.00119e-55	5.83632e-53
STAP1	45.0873	1.72701	0.167165	10.3312	5.09307e-25	1.66386e-23
USP2	177.571	1.04622	0.123612	8.46375	2.58916e-17	4.2404e-16
VCAN	2949.91	1.00042	0.113703	8.79856	1.38578e-18	2.5773e-17
DNAH5	191.353	1.2624	0.204242	6.1809	6.37362e-10	4.32497e-09
C6	394.839	1.71381	0.208638	8.21428	2.13444e-16	3.17004e-15
SOX30	5.96838	1.45043	0.204334	7.09837	1.2624e-12	1.22714e-11
CDH10	20.8538	-1.08277	0.210893	-5.13424	2.83285e-07	1.3331e-06
MYO16	2.23037	1.16297	0.253967	4.5792	4.66758e-06	1.83699e-05
TNC	3097.84	1.08745	0.151347	7.1851	6.71568e-13	6.74606e-12
ADAM28	606.284	1.46001	0.128259	11.3833	5.06379e-30	2.6312e-28
BARX2	60.0835	2.12778	0.196116	10.8496	2.00311e-27	8.37801e-26
ADRB1	401.716	-1.59459	0.146696	-10.8701	1.60058e-27	6.77033e-26
CP	1700.49	1.97574	0.160466	12.3125	7.75343e-35	6.51498e-33
ARHGAP6	386.494	-1.04072	0.0763491	-13.6311	2.61761e-42	4.20938e-40
TNFRSF17	10.6671	1.30253	0.3132	4.15878	3.19955e-05	0.000109855
GUCA1A	3.30967	1.69144	0.304941	5.54676	2.91004e-08	1.56754e-07
EPN3	90.59	1.69833	0.176682	9.61238	7.08893e-22	1.77024e-20
LTBP1	2083.76	1.21581	0.0879652	13.8214	1.89239e-43	3.26858e-41
LAMC3	697.485	-1.55693	0.167042	-9.32056	1.15724e-20	2.62618e-19
LAMA3	1514.37	-1.14686	0.0886261	-12.9405	2.66014e-38	3.14064e-36
ENTPD2	51.2308	1.74559	0.19087	9.14541	5.94037e-20	1.27663e-18
PTPRN	13.5003	1.11064	0.212944	5.21563	1.83195e-07	8.87615e-07
FOXC1	247.991	1.34157	0.134551	9.97071	2.04758e-23	5.82248e-22
CBLN4	108.296	2.50964	0.227754	11.0191	3.09245e-28	1.38337e-26
CHRDL2	422.005	1.54116	0.117237	13.1456	1.80252e-39	2.33502e-37
ITIH1	31.602	1.18289	0.121602	9.72755	2.30064e-22	6.03601e-21
NPFFR2	8.02383	2.63963	0.230767	11.4385	2.68436e-30	1.42661e-28
GYG2	99.8135	1.42634	0.150541	9.47476	2.6737e-21	6.35353e-20
COL11A1	30.411	1.50975	0.237245	6.36366	1.97003e-10	1.42217e-09
SPAG4	705.48	1.70393	0.124939	13.638	2.37849e-42	3.85812e-40
CDH3	927.517	2.58819	0.145516	17.7864	9.01294e-71	2.40182e-67
LTK	639.486	-1.58447	0.15004	-10.5604	4.54809e-26	1.65703e-24
GPC1	303.041	1.1896	0.136682	8.7034	3.22072e-18	5.77131e-17
SPA17	1123.67	1.25986	0.152237	8.27562	1.27787e-16	1.93958e-15
DMRT3	1.34921	2.80283	0.764001	3.66863	0.000243858	0.000725159
NGFR	1.84306	1.4986	0.475769	3.14984	0.00163358	0.00418294
EYA2	133.976	1.98135	0.168037	11.7912	4.33573e-32	2.70498e-30
BCAS1	188.547	1.55	0.190379	8.14164	3.89952e-16	5.65204e-15
SLC9A3R2	11008.7	-1.34861	0.0961933	-14.0198	1.17909e-44	2.24437e-42
NTN1	5.68488	1.43164	0.323318	4.42797	9.51246e-06	3.56746e-05
SNAP91	7.0274	1.20424	0.209401	5.75088	8.87791e-09	5.11453e-08
COL17A1	123.971	3.57394	0.235673	15.1648	6.04755e-52	2.30227e-49
NGEF	31.0195	1.63902	0.195214	8.396	4.61932e-17	7.34603e-16
CLDN18	78.8365	-1.10059	0.206015	-5.34227	9.17876e-08	4.63636e-07
PITX1	14.6244	1.8308	0.435514	4.20377	2.62509e-05	9.16579e-05
HES2	113.999	1.12009	0.13771	8.13369	4.16433e-16	6.02649e-15
ST6GALNAC1	472.117	1.60682	0.153097	10.4954	9.0686e-26	3.2222e-24
AL162171.1	662.176	-1.14755	0.0750753	-15.2854	9.56869e-53	4.21522e-50
SLC12A3	12.0487	1.18733	0.193426	6.13841	8.33512e-10	5.55298e-09
TRIP13	50.1699	1.39735	0.252692	5.52983	3.20535e-08	1.71522e-07
PRLH	23.3991	-1.67637	0.44164	-3.79579	0.000147174	0.000453558
MYO3B	14.6602	1.48449	0.0984531	15.0781	2.25614e-51	7.94077e-49
CDH19	66.6797	-1.22269	0.109599	-11.1561	6.68633e-29	3.2651e-27
LIMS2	4781.78	-1.10648	0.100119	-11.0516	2.15325e-28	9.84477e-27
MRVI1	714.78	1.21366	0.102625	11.8262	2.85802e-32	1.81339e-30
TP63	156.632	2.3458	0.231043	10.1531	3.21002e-24	9.70498e-23
ABCB11	0.567078	1.5211	0.541197	2.81062	0.00494465	0.0114176
DHRS9	631.28	1.00794	0.160087	6.29619	3.05051e-10	2.14571e-09
CD5L	7.30649	-1.28972	0.312054	-4.133	3.58056e-05	0.000121972
PTGS2	238.85	-1.17601	0.245369	-4.79282	1.64455e-06	6.89381e-06
ST6GAL1	2110.4	1.1752	0.0827767	14.1972	9.53466e-46	2.04436e-43
PPP2R2C	8.68847	1.44645	0.1454	9.94809	2.57059e-23	7.2875e-22
CDHR2	27.3571	1.49084	0.155702	9.57492	1.01937e-21	2.52528e-20
WSCD2	31.4522	1.30871	0.160127	8.17291	3.0103e-16	4.41116e-15
ATP12A	123.508	2.98667	0.292059	10.2262	1.51279e-24	4.71899e-23
SPAG6	368.437	1.6301	0.262183	6.21742	5.05389e-10	3.47366e-09
MAP2	561.282	-1.20476	0.0942592	-12.7814	2.08293e-37	2.28558e-35
LAMP3	122.78	-2.26207	0.33106	-6.83279	8.32763e-12	7.21187e-11
FAP	385.532	1.48753	0.151212	9.83743	7.76729e-23	2.1245e-21
NEBL	1089.81	-1.10153	0.0796607	-13.8277	1.73379e-43	3.02263e-41
BRINP1	1.35292	-1.92288	0.560806	-3.42878	0.000606293	0.00168878
TP73	70.3596	1.55626	0.229996	6.76649	1.31945e-11	1.1117e-10
PTPRH	11.7281	1.55353	0.185983	8.35308	6.65038e-17	1.04337e-15
PIH1D3	195.735	1.89918	0.281654	6.74296	1.55194e-11	1.2901e-10
IGSF9B	200.771	1.23786	0.121727	10.1691	2.72384e-24	8.28881e-23
AFP	3.76322	2.4188	0.333208	7.25911	3.89642e-13	4.02235e-12
CACNA1S	5.08582	-2.04313	0.189481	-10.7828	4.14974e-27	1.69386e-25
KCNK2	17.0907	2.54712	0.211194	12.0606	1.70537e-33	1.21885e-31
P2RX5	339.337	1.38835	0.159539	8.70226	3.25342e-18	5.81873e-17
SLCO1A2	58.4105	-3.95123	0.226659	-17.4325	4.67963e-68	8.72938e-65
IGSF9	60.2918	2.04405	0.155944	13.1076	2.97831e-39	3.80531e-37
AQP6	13.1082	1.33876	0.177567	7.53945	4.71942e-14	5.4444e-13
FAT2	90.8026	3.41392	0.225204	15.1593	6.57981e-52	2.40666e-49
MMP2	13540.2	1.2151	0.11626	10.4516	1.44006e-25	4.98385e-24
GNAO1	87.3862	1.19122	0.0991676	12.0122	3.06448e-33	2.141e-31
PTHLH	117.265	1.73031	0.157482	10.9874	4.39363e-28	1.94486e-26
SULT2B1	468.668	-1.17019	0.117469	-9.96167	2.24263e-23	6.36743e-22
SLC4A11	271.234	2.20279	0.150815	14.6059	2.57461e-48	6.86096e-46
F11	221.085	-1.73104	0.192416	-8.99637	2.33309e-19	4.75644e-18
CFAP61	115.896	1.36579	0.17823	7.66306	1.81548e-14	2.19055e-13
ICAM1	439.303	-1.20461	0.174092	-6.91937	4.53654e-12	4.08223e-11
FETUB	1.52236	2.75685	0.405328	6.80152	1.03522e-11	8.85419e-11
P3H2	1034.87	-1.29251	0.110263	-11.722	9.82797e-32	5.83857e-30
DLL3	1.73277	1.64991	0.247737	6.65995	2.73927e-11	2.21205e-10
IL5RA	207.729	1.23334	0.158459	7.78331	7.06528e-15	9.01476e-14
SMPX	2.5214	1.87249	0.744496	2.51511	0.0118995	0.0250364
CCDC80	4857.75	1.60039	0.168451	9.50063	2.08627e-21	5.03457e-20
CMA1	113.165	1.45627	0.25543	5.70124	1.18939e-08	6.73555e-08
DAZL	1.63401	2.43458	0.322152	7.55724	4.11718e-14	4.76143e-13
SEMA6A	793.512	-1.3415	0.0980036	-13.6883	1.19251e-42	1.98617e-40
COL9A3	147.692	1.20297	0.152549	7.88576	3.12615e-15	4.15055e-14
TEKT2	193.831	1.33161	0.217238	6.12972	8.80321e-10	5.83564e-09
NXPE1	2.22239	1.08612	0.222717	4.87667	1.07892e-06	4.67397e-06
SH2D3C	2015.9	-1.43632	0.102184	-14.0562	7.05756e-45	1.37137e-42
WHRN	349.703	1.05388	0.115557	9.11993	7.51719e-20	1.5971e-18
CRTAC1	485.266	-1.72379	0.153994	-11.1939	4.36852e-29	2.16155e-27
IL11	68.1565	2.41804	0.197104	12.2679	1.34779e-34	1.08838e-32
KCNK16	4.69916	-1.26593	0.23576	-5.36959	7.89177e-08	4.02002e-07
EFHC1	1989.25	1.11063	0.134644	8.24861	1.60246e-16	2.41456e-15
DSP	198.675	1.08673	0.126516	8.58967	8.7219e-18	1.50229e-16
CBARP	80.2123	1.40514	0.212122	6.62424	3.49045e-11	2.77658e-10
MMP11	61.5663	2.38429	0.190484	12.517	6.02984e-36	5.62403e-34
CECR2	85.8537	-1.3612	0.0984299	-13.8291	1.70093e-43	2.99332e-41
DERL3	2498.29	2.62386	0.173886	15.0895	1.89733e-51	6.80631e-49
SUSD2	69.0915	-1.08138	0.160338	-6.74439	1.53673e-11	1.2786e-10
GGT5	1546.5	1.13225	0.11307	10.0138	1.32619e-23	3.85338e-22
UPB1	85.1799	-1.52995	0.119721	-12.7793	2.1401e-37	2.33459e-35
GGT1	2060.47	-1.01944	0.102124	-9.98233	1.82144e-23	5.19528e-22
GGTLC2	39.0989	-1.18906	0.16654	-7.13976	9.34912e-13	9.19338e-12
CENPM	427.144	1.44411	0.156227	9.24365	2.38225e-20	5.26523e-19
RSPH14	221.678	1.73518	0.242599	7.15247	8.523e-13	8.42098e-12
RAB36	514.787	1.40656	0.164007	8.57623	9.80348e-18	1.67774e-16
ACR	107.846	-1.04047	0.128878	-8.0733	6.84221e-16	9.70605e-15
COCH	16.2224	1.63076	0.254749	6.40143	1.53929e-10	1.12515e-09
SAMD15	71.0709	1.49919	0.175239	8.55511	1.17752e-17	1.98963e-16
ISM2	1.21112	1.14849	0.345862	3.32066	0.00089804	0.00242151
SIX4	14.6929	1.15549	0.288442	4.00596	6.17665e-05	0.000201277
ASB2	304.269	1.46916	0.133667	10.9912	4.21109e-28	1.87479e-26
SERPINA4	0.406609	1.78392	0.528644	3.37453	0.000739429	0.00202396
BDKRB1	126.567	1.12421	0.191219	5.87921	4.12233e-09	2.48298e-08
CPNE6	8.2783	1.81233	0.224182	8.0842	6.25721e-16	8.90328e-15
MMP9	1346.72	1.45143	0.226458	6.40927	1.46219e-10	1.07408e-09
MYBL2	1.7891	1.7459	0.695879	2.50892	0.0121102	0.0254253
HNF4A	14.2081	1.78653	0.165124	10.8193	2.78901e-27	1.15358e-25
RIMS4	36.4083	-1.12202	0.133536	-8.40238	4.37522e-17	6.96971e-16
SALL4	8.74465	1.54254	0.241468	6.38816	1.67898e-10	1.22104e-09
DOK5	113.312	2.13512	0.163006	13.0985	3.35964e-39	4.26332e-37
BMP7	60.5647	1.33457	0.198636	6.7187	1.83349e-11	1.51537e-10
TUBB1	67.9979	-1.87375	0.176448	-10.6193	2.4246e-26	9.1849e-25
SLCO4A1	1484.23	-1.29679	0.183729	-7.05821	1.68662e-12	1.60276e-11
NKAIN4	32.888	1.30857	0.164815	7.9396	2.02828e-15	2.75168e-14
CHRNA4	27.0087	2.21308	0.358338	6.17597	6.57579e-10	4.44921e-09
SPEF1	456.212	1.65527	0.250371	6.61126	3.81057e-11	3.00942e-10
FERMT1	97.3667	1.66632	0.118507	14.061	6.59841e-45	1.29565e-42
PDYN	0.662888	-1.06826	0.397746	-2.68577	0.00723623	0.0161099
CCM2L	640.728	-1.06929	0.100344	-10.6562	1.63104e-26	6.31232e-25
CST4	0.831406	2.53798	0.824745	3.07729	0.00208892	0.0052431
SPINT3	1.61818	-2.14717	0.67378	-3.18675	0.00143882	0.00372205
FAM83D	20.6458	2.12883	0.398857	5.33733	9.43278e-08	4.7608e-07
VSIG1	181.938	2.52172	0.226984	11.1097	1.12555e-28	5.35787e-27
GUCY2F	3.20886	1.52986	0.296495	5.15981	2.47207e-07	1.17548e-06
GLRA2	1.24513	1.4792	0.297711	4.96859	6.74408e-07	3.01039e-06
PIM2	3201.83	1.7277	0.123796	13.956	2.89212e-44	5.34155e-42
RS1	96.9946	-2.04991	0.174137	-11.7719	5.45044e-32	3.34449e-30
PCSK1N	2.22685	1.76617	0.62315	2.83426	0.00459318	0.0107115
TIMP1	11832.2	1.12577	0.180439	6.23908	4.40153e-10	3.04548e-09
KLHL4	24.9076	1.44583	0.203885	7.0914	1.32763e-12	1.28319e-11
PCDH11X	5.78698	-1.02091	0.154225	-6.61962	3.60113e-11	2.85488e-10
ITIH6	2.01014	1.99439	0.419774	4.7511	2.02315e-06	8.34767e-06
TAF7L	6.6422	1.30783	0.13339	9.80454	1.07635e-22	2.90568e-21
FGF14	193.444	1.135	0.141052	8.0467	8.50558e-16	1.19655e-14
HTR2A	30.5822	1.75812	0.145036	12.122	8.07866e-34	5.98013e-32
SGCG	175.214	-1.52941	0.139894	-10.9326	8.04859e-28	3.49159e-26
RGCC	7855.1	-1.4197	0.134136	-10.5841	3.53192e-26	1.30983e-24
MEDAG	8.2829	1.6741	0.634449	2.63868	0.00832304	0.0182635
TSNAXIP1	323.629	1.31402	0.188258	6.97987	2.95445e-12	2.72429e-11
CCDC113	330.256	1.59578	0.205481	7.76607	8.09573e-15	1.02385e-13
PRSS54	5.46576	1.01122	0.349405	2.89412	0.00380222	0.0090364
NDRG4	1241.37	-1.88056	0.139621	-13.469	2.37908e-41	3.55036e-39
FA2H	27.5878	1.1655	0.22802	5.11141	3.19759e-07	1.49456e-06
SLC7A5	520.833	1.1668	0.166221	7.01955	2.2258e-12	2.08644e-11
RHBDL1	83.49	1.13329	0.0857202	13.2208	6.65179e-40	9.12372e-38
CRYM	531.342	1.05134	0.133805	7.85722	3.9276e-15	5.14866e-14
SLC6A2	7.86028	2.02664	0.225834	8.974	2.85949e-19	5.77908e-18
ACSBG1	84.956	1.40908	0.242648	5.80712	6.35578e-09	3.73655e-08
IGDCC4	67.7369	1.80045	0.168568	10.6808	1.25163e-26	4.91534e-25
FAM189A1	66.6807	-1.6123	0.13131	-12.2785	1.18105e-34	9.66285e-33
SCG3	1.02836	1.56374	0.639238	2.44625	0.014435	0.0297078
RP1	254.028	1.17046	0.216029	5.41808	6.02427e-08	3.11552e-07
CA2	219.277	-1.67182	0.180485	-9.2629	1.98962e-20	4.42364e-19
EYA1	41.9743	1.80178	0.303116	5.9442	2.7781e-09	1.7257e-08
SFRP1	211.967	1.59532	0.222776	7.16109	8.00378e-13	7.9374e-12
JPH1	27.8257	-1.15792	0.200965	-5.76178	8.32306e-09	4.8172e-08
CCN4	38.1291	1.27671	0.289101	4.41614	1.00477e-05	3.75161e-05
ARHGEF10	1173.36	-1.00905	0.0818756	-12.3242	6.71359e-35	5.69251e-33
KCNN4	396.981	1.43251	0.119691	11.9684	5.20298e-33	3.55518e-31
CGB2	2.94319	1.40252	0.497448	2.81944	0.00481078	0.0111534
RETN	27.4918	-1.18923	0.30706	-3.87295	0.000107528	0.000338422
FCER2	51.0516	1.2128	0.183699	6.60212	4.05324e-11	3.18891e-10
NOVA2	127.55	-1.27729	0.115279	-11.08	1.56849e-28	7.33298e-27
LILRA1	211.934	-1.25027	0.137208	-9.11225	8.06941e-20	1.71053e-18
TNNT1	143.097	-1.44282	0.17957	-8.03488	9.36742e-16	1.31285e-14
PRX	1834.31	-2.34173	0.165936	-14.1122	3.19329e-45	6.5459e-43
DENND3	3243.83	-1.14188	0.0792101	-14.4159	4.1121e-47	9.83425e-45
CD79A	1536.62	2.77703	0.194937	14.2458	4.7634e-46	1.05781e-43
LIM2	6.97323	-2.23769	0.26639	-8.40005	4.46305e-17	7.10356e-16
NKG7	485.16	-1.25619	0.143319	-8.76497	1.86831e-18	3.42017e-17
CEACAM5	371.165	1.03937	0.22269	4.66733	3.05133e-06	1.23283e-05
CCDC114	846.704	1.65114	0.243535	6.77989	1.20264e-11	1.01834e-10
CABP5	4.08697	-1.99892	0.285402	-7.00387	2.48982e-12	2.31762e-11
HAS1	392.664	1.94378	0.338516	5.74207	9.35277e-09	5.36655e-08
CAPS	4352.39	1.53038	0.257584	5.94129	2.82787e-09	1.75486e-08
RASIP1	577.904	-1.0451	0.10643	-9.81961	9.26969e-23	2.52065e-21
THEG	12.049	1.67234	0.260768	6.41315	1.42543e-10	1.05016e-09
CACNG7	0.390813	1.75039	0.736275	2.37736	0.0174369	0.0351718
SLC5A5	5.04528	3.53373	0.540433	6.5387	6.20574e-11	4.77172e-10
COMP	413.93	3.12252	0.20314	15.3712	2.55312e-53	1.16161e-50
MAG	53.2303	-1.35291	0.297217	-4.55195	5.31521e-06	2.07407e-05
TMEM59L	42.5143	2.51344	0.229515	10.9511	6.56585e-28	2.855e-26
RUNDC3B	61.2089	1.32523	0.171261	7.73811	1.00902e-14	1.25817e-13
DLX5	7.71176	1.23786	0.26982	4.58771	4.48137e-06	1.76922e-05
GSDME	167.625	1.01913	0.11228	9.07668	1.1194e-19	2.34884e-18
ATP6V0A4	20.4273	1.41751	0.244563	5.79607	6.78864e-09	3.97474e-08
CAV1	15735	-1.27665	0.100779	-12.6678	8.91591e-37	9.2444e-35
TSPAN12	1921.43	-1.14226	0.0961943	-11.8745	1.60633e-32	1.03684e-30
GHRHR	27.3071	-2.08742	0.229514	-9.09494	9.46384e-20	1.99479e-18
CCL24	1082.09	1.84791	0.213139	8.66996	4.32268e-18	7.63592e-17
CYP3A5	684.248	-1.54975	0.127996	-12.1079	9.59643e-34	7.07557e-32
PTPRZ1	175.573	1.41838	0.165179	8.58688	8.93594e-18	1.53774e-16
SFRP4	567.526	1.24504	0.163994	7.59196	3.151e-14	3.71078e-13
AGR2	4503.32	1.24297	0.162348	7.65623	1.91473e-14	2.30286e-13
PRUNE2	761.828	1.33109	0.11659	11.4169	3.4446e-30	1.81513e-28
OGN	58.8289	1.03007	0.180285	5.71357	1.10628e-08	6.28777e-08
ASPN	1435.09	1.80256	0.140948	12.7888	1.89404e-37	2.09062e-35
DNM1	2008.43	1.18875	0.138143	8.6052	7.61848e-18	1.32077e-16
CA9	40.5164	1.12519	0.16999	6.61917	3.61212e-11	2.86238e-10
PIP5K1B	135.454	-1.03943	0.0822002	-12.6451	1.19044e-36	1.1939e-34
GATA3	18.2741	-1.1428	0.270991	-4.2171	2.47459e-05	8.68505e-05
CXCL12	4743.63	1.18498	0.107196	11.0543	2.08979e-28	9.57811e-27
SPOCK2	3129.09	-1.44179	0.133146	-10.8286	2.51929e-27	1.04899e-25
DKK1	158.339	1.13644	0.214531	5.29733	1.1751e-07	5.847e-07
EBF3	31.7585	1.82969	0.188111	9.72669	2.32031e-22	6.07056e-21
DNAJC12	46.4939	1.42407	0.14452	9.85383	6.59781e-23	1.81795e-21
KRT23	172.79	1.86174	0.215855	8.62495	6.41219e-18	1.11788e-16
CSF3	3472.97	-2.54395	0.30274	-8.40308	4.34904e-17	6.93394e-16
KRT37	0.478428	1.64897	0.529669	3.11321	0.00185064	0.0046962
SLC6A4	2442.86	-2.97598	0.279509	-10.6472	1.7976e-26	6.91392e-25
ALDH3A1	476.914	1.7845	0.214286	8.32768	8.2441e-17	1.27729e-15
CCL7	210.303	2.05377	0.310068	6.62363	3.50474e-11	2.78676e-10
CCL1	7.93667	1.27305	0.305055	4.17318	3.00382e-05	0.000103794
KRT32	3.15993	1.74812	0.246782	7.08366	1.40398e-12	1.35348e-11
COL1A1	13191.8	2.13692	0.173924	12.2865	1.07045e-34	8.79653e-33
PTGES3L.AARSD1	25.3401	1.06028	0.136803	7.7504	9.16057e-15	1.15072e-13
CWH43	36.7112	1.62943	0.281519	5.78799	7.12355e-09	4.16039e-08
ODAM	153.031	-1.73148	0.167576	-10.3326	5.0206e-25	1.64306e-23
SMR3A	1.25787	2.84406	0.779495	3.6486	0.000263676	0.000780483
NMU	36.3888	1.22863	0.225537	5.44757	5.10616e-08	2.66434e-07
ANXA10	19.3936	1.18018	0.182618	6.46257	1.02942e-10	7.71818e-10
NRXN2	124.264	1.34635	0.158515	8.49348	2.00543e-17	3.3135e-16
FOLR3	251.932	-1.47923	0.154676	-9.56342	1.13929e-21	2.80373e-20
APOA5	4.44325	-2.96164	0.290383	-10.1991	2.0016e-24	6.19201e-23
APOC3	2.44729	-2.70706	0.572129	-4.73156	2.22802e-06	9.15249e-06
MDK	4775.12	1.13094	0.105913	10.678	1.29083e-26	5.04803e-25
SLC35F2	20.698	1.00807	0.231116	4.36173	1.2904e-05	4.73934e-05
ELMOD1	19.7493	1.06427	0.193643	5.49601	3.88483e-08	2.05932e-07
POU2AF1	501.412	1.83246	0.217468	8.42632	3.56699e-17	5.73221e-16
ASIC1	91.363	1.69643	0.135173	12.5501	3.97177e-36	3.76089e-34
LIN7A	239.68	-1.03758	0.0798366	-12.9962	1.28521e-38	1.5877e-36
TRPV4	255.606	1.60748	0.15025	10.6987	1.03214e-26	4.06191e-25
PRMT8	67.1306	1.06312	0.189197	5.61915	1.91903e-08	1.0538e-07
MYL2	5.2735	1.82946	0.269953	6.77697	1.22723e-11	1.03728e-10
RASAL1	52.084	1.62485	0.166625	9.75159	1.81608e-22	4.80526e-21
ACRBP	252.427	-1.08707	0.121861	-8.92058	4.63853e-19	9.11771e-18
SLCO1B3	8.01063	2.34257	0.297062	7.88581	3.1251e-15	4.15055e-14
RSPH4A	500.662	1.60364	0.223197	7.18487	6.72719e-13	6.75399e-12
IL17A	1.79285	-1.86049	0.476302	-3.90612	9.37912e-05	0.0002977
RBM24	71.7179	1.22581	0.174499	7.02475	2.14456e-12	2.01535e-11
CCR6	83.5988	1.05325	0.145208	7.25343	4.0635e-13	4.17864e-12
UNC93A	0.46864	1.98042	0.704551	2.81089	0.00494046	0.0114101
PACRG	478.519	1.40282	0.193744	7.24058	4.46772e-13	4.57414e-12
C6orf118	234.014	1.83809	0.291713	6.30103	2.95678e-10	2.08371e-09
PDE10A	87.6547	2.87545	0.214444	13.4089	5.36563e-41	7.78864e-39
SMOC2	953.549	1.1575	0.136888	8.45583	2.77115e-17	4.51468e-16
CLIC5	17.9622	-1.29679	0.253763	-5.11024	3.21749e-07	1.50348e-06
SEMA5A	14.0432	-2.33398	0.233492	-9.99595	1.58759e-23	4.57727e-22
C7	17766	1.05871	0.122615	8.6344	5.90368e-18	1.03503e-16
THBS4	294.219	1.61393	0.140329	11.501	1.30341e-30	7.06796e-29
BTNL8	162.002	-1.99051	0.138754	-14.3456	1.13497e-46	2.6138e-44
NPR3	385.76	-1.25978	0.112893	-11.1591	6.46666e-29	3.16612e-27
PCDH12	540.259	-1.44062	0.11188	-12.8765	6.10228e-38	7.07031e-36
LIFR	1224.14	-1.20331	0.107802	-11.1623	6.23544e-29	3.06095e-27
CDX1	13.7272	1.07719	0.138821	7.75957	8.52201e-15	1.07557e-13
STC2	388.97	-1.18086	0.156248	-7.55765	4.10415e-14	4.7493e-13
CNTN3	119.803	1.38446	0.129228	10.7133	8.81444e-27	3.49097e-25
CLDN16	78.0192	1.63613	0.222744	7.34533	2.05257e-13	2.17797e-12
RBP2	410.125	-1.97031	0.176481	-11.1644	6.08717e-29	2.99604e-27
BCHE	301.539	1.04808	0.15505	6.75967	1.38308e-11	1.16163e-10
SERPINI2	133.234	1.44944	0.194014	7.47081	7.97033e-14	8.91358e-13
COL7A1	1062.73	2.19557	0.130691	16.7997	2.45124e-63	2.68974e-60
HYAL1	639.646	-1.28482	0.0991622	-12.9567	2.15244e-38	2.57382e-36
HHLA2	373.633	2.14306	0.213732	10.0268	1.16171e-23	3.39131e-22
IQCG	1043.11	1.33459	0.15371	8.68251	3.87124e-18	6.87754e-17
ROPN1B	49.9151	1.18228	0.210119	5.62675	1.83641e-08	1.01111e-07
UPK1B	34.7861	2.91965	0.310742	9.39574	5.68155e-21	1.31985e-19
EFCC1	707.687	-1.43987	0.0942901	-15.2707	1.19959e-52	5.08573e-50
ARHGEF26	1042.6	-1.46941	0.098798	-14.8729	4.94514e-50	1.59046e-47
VIPR1	3076.27	-2.59253	0.194862	-13.3044	2.18217e-40	3.03777e-38
TNNC1	3553.92	-1.57974	0.142357	-11.097	1.29676e-28	6.09316e-27
SLC4A3	127.307	1.10514	0.100652	10.9798	4.78189e-28	2.09886e-26
ADAM23	93.925	1.42074	0.139387	10.1928	2.13507e-24	6.58307e-23
IL1A	121.001	-1.21171	0.218507	-5.5454	2.93289e-08	1.57939e-07
STEAP3	642.787	1.0632	0.104213	10.2022	1.93907e-24	6.00854e-23
EPB41L5	714.735	-1.62051	0.095582	-16.9542	1.79317e-64	2.57306e-61
FNDC4	103.688	1.6595	0.189827	8.74215	2.28721e-18	4.15439e-17
PDE1A	244.399	1.08423	0.100736	10.7631	5.14208e-27	2.07172e-25
SPTBN1	4472.8	-1.02066	0.0806442	-12.6563	1.03245e-36	1.05821e-34
TACR1	19.4575	1.16605	0.263234	4.42972	9.43563e-06	3.54149e-05
ACADL	214.581	-1.88984	0.153542	-12.3083	8.17046e-35	6.83461e-33
DNAH6	144.161	1.45672	0.199773	7.29185	3.05734e-13	3.19326e-12
IGFBP2	4488.49	1.24854	0.115738	10.7876	3.9373e-27	1.61067e-25
OTX1	17.7943	2.30495	0.249845	9.22552	2.82192e-20	6.20755e-19
GNLY	3275.49	-1.819	0.160198	-11.3547	7.03081e-30	3.6031e-28
IL1RL1	3718.86	-2.2365	0.230354	-9.70896	2.76143e-22	7.16436e-21
IL18R1	793.898	-1.27192	0.135327	-9.39887	5.51528e-21	1.28442e-19
IL18RAP	433.953	-1.04732	0.143794	-7.28346	3.25364e-13	3.39069e-12
FHL2	1196.07	2.13978	0.109543	19.5337	5.67978e-85	1.05951e-80
HPCAL1	3454.58	-1.20223	0.0773188	-15.549	1.61641e-54	8.86837e-52
EPAS1	6941.98	-1.31815	0.129606	-10.1704	2.68814e-24	8.19356e-23
GRIN3B	120.504	1.47248	0.192541	7.64762	2.04726e-14	2.45592e-13
PAPPA2	6.8633	1.79962	0.377527	4.76688	1.87098e-06	7.75757e-06
RALGPS2	206.962	1.13049	0.0967254	11.6876	1.47467e-31	8.54299e-30
KIAA1324	284.893	1.18674	0.161595	7.34389	2.07474e-13	2.20024e-12
AMPD1	180.113	2.10354	0.213485	9.85337	6.62851e-23	1.82372e-21
CFHR3	22.1267	1.07418	0.149169	7.20112	5.97182e-13	6.01503e-12
NT5C1A	4.641	1.20375	0.232262	5.18273	2.18661e-07	1.04694e-06
HPCAL4	26.184	-1.40703	0.191196	-7.35912	1.85132e-13	1.97452e-12
ST6GALNAC5	201.927	-1.06436	0.120689	-8.81902	1.15463e-18	2.16467e-17
SLAMF1	52.2489	1.03313	0.189079	5.46402	4.65481e-08	2.44387e-07
ADGRL2	3315.08	-1.13399	0.0990511	-11.4485	2.39114e-30	1.27806e-28
MFAP2	2128.93	1.24403	0.116553	10.6734	1.35511e-26	5.27728e-25
RGS4	194.015	1.49986	0.18987	7.89941	2.80232e-15	3.75266e-14
PLA2G2D	123.561	2.00747	0.240655	8.34168	7.32408e-17	1.14329e-15
CR2	177.838	1.82863	0.172978	10.5714	4.04325e-26	1.4847e-24
SLC2A1	537.946	1.29643	0.125457	10.3337	4.96029e-25	1.62617e-23
ARTN	138.3	1.18534	0.134215	8.83166	1.03138e-18	1.95134e-17
TSPAN1	1896.38	2.03153	0.197778	10.2718	9.44207e-25	3.01597e-23
CCDC181	179.879	1.1758	0.179677	6.54395	5.99148e-11	4.6203e-10
MROH9	81.3129	1.58526	0.253284	6.25885	3.87816e-10	2.70139e-09
PLPPR5	2.45242	-1.71858	0.405201	-4.2413	2.22234e-05	7.86781e-05
PLPPR4	155.051	1.47271	0.129671	11.3572	6.82696e-30	3.50827e-28
SLC5A9	280.074	-1.77928	0.126218	-14.0969	3.96913e-45	8.04785e-43
MUC5B	2175.62	3.39556	0.290066	11.7062	1.18491e-31	6.92893e-30
COLEC11	268.908	1.42966	0.134109	10.6604	1.55867e-26	6.04479e-25
APOA1	54.0047	-1.49062	0.128879	-11.5661	6.12081e-31	3.39814e-29
ZNF541	18.1916	-1.03252	0.114633	-9.00722	2.1134e-19	4.33223e-18
TTR	37.728	2.68015	0.348048	7.70054	1.35491e-14	1.6628e-13
CASC1	197.244	1.49104	0.20866	7.1458	8.94727e-13	8.81706e-12
ADGB	210.554	1.41762	0.217072	6.53063	6.54938e-11	5.02146e-10
ARG1	131.082	-1.5446	0.192285	-8.03287	9.52175e-16	1.33247e-14
SPP1	2078.66	2.84427	0.270679	10.5079	7.94265e-26	2.82752e-24
RARRES1	1835.65	1.27943	0.14305	8.94388	3.75727e-19	7.46412e-18
CCND2	86.6386	1.39683	0.170231	8.20548	2.29672e-16	3.40565e-15
DNAH7	239.702	1.53998	0.202441	7.60703	2.8046e-14	3.32382e-13
GDA	32.7628	1.65073	0.163578	10.0914	6.03263e-24	1.78268e-22
C1orf198	2413.53	-1.03618	0.0679118	-15.2578	1.46139e-52	6.05794e-50
SLC46A2	111.45	-1.01902	0.19587	-5.20251	1.96618e-07	9.48464e-07
NR4A3	878.911	1.10852	0.237533	4.66681	3.05914e-06	1.23518e-05
CSF3R	5974.18	-1.13163	0.121562	-9.30909	1.28938e-20	2.9154e-19
PPP4R4	21.0595	-1.11999	0.172175	-6.50497	7.77096e-11	5.90226e-10
GPAM	26.5533	-1.30936	0.228163	-5.73868	9.5419e-09	5.47002e-08
CFAP58	19.6778	1.27719	0.317859	4.0181	5.86704e-05	0.000191704
CRHR1	5.10756	1.52846	0.279896	5.46081	4.7396e-08	2.48629e-07
HOXB1	2.06358	2.53149	0.411769	6.14783	7.85477e-10	5.2536e-09
TEK	230.114	-1.06945	0.108768	-9.83235	8.16922e-23	2.2279e-21
GRIA2	4.91907	1.3909	0.299918	4.63761	3.52463e-06	1.40849e-05
TNN	42.4557	1.52504	0.14721	10.3596	3.78357e-25	1.25809e-23
TP53AIP1	83.2878	2.71139	0.257574	10.5267	6.50997e-26	2.33533e-24
TEX11	2.33248	2.18114	0.243026	8.97493	2.83523e-19	5.73626e-18
TNFSF11	10.9401	1.4283	0.201022	7.1052	1.20151e-12	1.16978e-11
CLU	40358	1.19454	0.10826	11.034	2.61905e-28	1.18295e-26
ADRA1A	137.707	-2.44696	0.15791	-15.4959	3.69712e-54	1.86395e-51
CRISPLD1	114.353	1.08672	0.135938	7.99426	1.30354e-15	1.79986e-14
MND1	73.8796	1.07287	0.122204	8.77931	1.64485e-18	3.03792e-17
GJB6	3.42538	1.22838	0.281252	4.36753	1.25661e-05	4.6216e-05
ADGRB2	109.897	1.63601	0.116794	14.0077	1.39936e-44	2.63674e-42
SLITRK3	13.7136	1.16463	0.231457	5.03175	4.86031e-07	2.21836e-06
TMEM156	119.716	1.60948	0.182879	8.80076	1.35897e-18	2.52995e-17
CPXM2	7.64964	1.18323	0.140105	8.44536	3.03107e-17	4.89962e-16
XPNPEP2	9.81504	1.83689	0.262307	7.00283	2.50847e-12	2.33265e-11
PAEP	32.8923	1.25363	0.236625	5.29794	1.17114e-07	5.82885e-07
LAX1	217.511	1.16234	0.10993	10.5735	3.95568e-26	1.45541e-24
CD244	21.5376	-1.01195	0.19075	-5.30511	1.12603e-07	5.62531e-07
LY9	339.286	1.20389	0.147851	8.14262	3.8682e-16	5.611e-15
LDB3	266.633	1.11264	0.135735	8.19715	2.46144e-16	3.64121e-15
OPN4	1.3507	2.56649	0.489059	5.24782	1.53908e-07	7.53148e-07
WIPF3	47.5834	1.1454	0.148901	7.69239	1.44415e-14	1.76419e-13
INHBA	75.5918	-1.13572	0.222867	-5.09596	3.46985e-07	1.61534e-06
RAMP3	7258.11	-1.21287	0.126183	-9.61198	7.11655e-22	1.77476e-20
TWIST1	17.3571	2.69672	0.365901	7.37008	1.70529e-13	1.82714e-12
SPINK4	1.34349	1.87787	0.810608	2.31661	0.0205248	0.0406487
PHF24	19.7196	1.00834	0.133052	7.57853	3.49501e-14	4.09266e-13
DNAI1	759.835	1.83516	0.259626	7.06849	1.56627e-12	1.49986e-11
AKR1D1	10.1998	2.11995	0.180016	11.7765	5.16061e-32	3.1771e-30
NECAB1	34.3386	-1.8083	0.153748	-11.7615	6.16642e-32	3.74685e-30
SPRYD7	107.399	-1.01	0.0984981	-10.254	1.1356e-24	3.59041e-23
NFE2	111.251	-1.40664	0.167797	-8.38299	5.16001e-17	8.17798e-16
IL13RA2	223.33	2.85936	0.239109	11.9584	5.87035e-33	3.98202e-31
COL10A1	397.1	3.68687	0.204095	18.0644	6.0725e-73	2.26553e-69
MOGAT1	26.2724	-1.12498	0.214348	-5.24839	1.53436e-07	7.51343e-07
KCNS1	14.4059	-1.71114	0.175867	-9.72973	2.252e-22	5.91673e-21
ARHGAP40	79.5574	1.77505	0.173228	10.2469	1.22222e-24	3.83826e-23
TOX2	615.537	-1.05283	0.103267	-10.1952	2.0835e-24	6.43472e-23
GTSF1L	3.10275	2.26132	0.337959	6.6911	2.21498e-11	1.81061e-10
EDN3	8.15439	-1.42773	0.232085	-6.15177	7.66251e-10	5.12869e-09
CDH26	428.72	1.07214	0.123257	8.6984	3.36611e-18	6.00874e-17
C20orf85	4818.37	1.86714	0.282325	6.61342	3.75545e-11	2.9684e-10
PCK1	3.49849	1.01257	0.400331	2.52933	0.0114281	0.0241948
CHST8	18.3941	1.40419	0.142665	9.84255	7.38138e-23	2.02297e-21
HIF3A	1203.52	-1.87979	0.157633	-11.9251	8.75338e-33	5.87358e-31
CEACAM8	4.79981	-1.07903	0.383692	-2.81223	0.00491998	0.0113684
CRISP2	36.9568	1.42197	0.291628	4.87597	1.08273e-06	4.68773e-06
GRM4	5.8245	1.38365	0.170243	8.12749	4.38272e-16	6.33271e-15
SLC17A3	10.1221	-1.25111	0.151561	-8.25481	1.52148e-16	2.29811e-15
SLC17A1	1.08873	-1.00207	0.286967	-3.49195	0.000479517	0.0013592
SPDEF	14.0261	1.57368	0.276015	5.70143	1.1881e-08	6.7323e-08
TCP11	23.1156	1.40349	0.194478	7.21669	5.32698e-13	5.40346e-12
CPNE5	371.859	2.01935	0.122932	16.4265	1.23638e-60	1.09826e-57
KCNK17	74.1716	-1.02106	0.158065	-6.45973	1.04891e-10	7.86112e-10
OPN5	1.51498	1.63213	0.33899	4.81466	1.47448e-06	6.23695e-06
CXCL6	23.741	2.21388	0.413487	5.35415	8.59582e-08	4.35842e-07
MYRF	833.788	-2.25801	0.147733	-15.2844	9.71665e-53	4.21522e-50
SSUH2	58.9826	1.38793	0.178329	7.78294	7.0856e-15	9.03078e-14
PIWIL1	1.50991	1.75107	0.361349	4.84592	1.26025e-06	5.40802e-06
EFNB2	1233.64	-1.12448	0.0928758	-12.1074	9.65454e-34	7.09039e-32
SOX21	19.1822	1.11108	0.265923	4.1782	2.93831e-05	0.00010171
MYH2	8.2564	-1.0512	0.254587	-4.12905	3.6427e-05	0.000123885
KIR2DL1	2.35357	-1.69938	0.406255	-4.18303	2.87654e-05	9.9775e-05
IL37	19.0973	1.47073	0.229532	6.4075	1.47924e-10	1.08509e-09
GRIA3	21.7821	1.14851	0.157216	7.30534	2.76558e-13	2.89827e-12
FOSB	5996.22	-1.11341	0.289503	-3.84594	0.000120089	0.000375422
LAMP5	4.98375	1.93791	0.285788	6.78094	1.19401e-11	1.01149e-10
LRRN4	323.982	-1.2366	0.158222	-7.81559	5.47083e-15	7.0576e-14
TCF15	48.5496	-1.19802	0.145038	-8.26009	1.45566e-16	2.20048e-15
ID1	1906.08	-1.3032	0.122607	-10.629	2.18402e-26	8.31444e-25
BPIFB1	266.813	3.27043	0.28918	11.3093	1.17988e-29	5.99712e-28
CCR7	290.168	1.43494	0.13154	10.9088	1.04626e-27	4.46612e-26
SIX1	202.513	2.17826	0.217853	9.99875	1.54333e-23	4.46346e-22
PZP	57.3011	1.15083	0.19096	6.02658	1.67463e-09	1.07092e-08
OMG	2042.32	1.28492	0.18851	6.81615	9.3512e-12	8.05343e-11
PTPRB	1570.35	-1.31405	0.110046	-11.941	7.23659e-33	4.87333e-31
F2RL3	632.483	-1.31839	0.225257	-5.85285	4.83233e-09	2.88917e-08
ADM2	45.5389	1.38654	0.133179	10.411	2.20815e-25	7.47565e-24
MGAT3	94.5925	-1.2096	0.136962	-8.83165	1.03143e-18	1.95134e-17
MCHR1	30.3181	1.46877	0.186188	7.88862	3.05541e-15	4.06531e-14
RIBC2	241.506	1.67371	0.212029	7.89375	2.93228e-15	3.91825e-14
KRT17	451.518	1.93647	0.290126	6.67459	2.47919e-11	2.01336e-10
CPA4	11.2173	1.22528	0.274501	4.46366	8.05708e-06	3.05792e-05
CDHR3	1542.77	1.50223	0.208354	7.20998	5.5959e-13	5.65471e-12
FLNC	614.713	1.74633	0.161567	10.8087	3.12982e-27	1.29167e-25
LRRC17	75.4238	1.28077	0.132975	9.63165	5.87805e-22	1.47775e-20
FEZF1	5.10184	1.55914	0.267538	5.82773	5.61862e-09	3.32835e-08
GAD1	25.8154	1.08654	0.179881	6.0403	1.53832e-09	9.88485e-09
HOXD10	6.32677	1.07112	0.232321	4.61054	4.01628e-06	1.59471e-05
DLL4	78.9602	-1.10758	0.114839	-9.64462	5.18019e-22	1.31471e-20
ISLR	883.241	1.52133	0.139418	10.912	1.00981e-27	4.3204e-26
ACKR4	283.025	-1.18105	0.103648	-11.3948	4.43872e-30	2.31933e-28
BBOX1	41.0007	1.75885	0.198458	8.86259	7.81791e-19	1.49994e-17
E2F8	39.5567	1.2518	0.192974	6.48691	8.7614e-11	6.60878e-10
AIPL1	6.11033	1.33902	0.149103	8.98055	2.69425e-19	5.46289e-18
KLK8	22.1318	1.07809	0.408703	2.63783	0.00834378	0.0183025
CDO1	100.143	-1.33592	0.141584	-9.43552	3.8905e-21	9.15174e-20
QRICH2	172.206	-1.0326	0.097512	-10.5895	3.33406e-26	1.24387e-24
ART1	21.975	-1.19233	0.243776	-4.8911	1.00275e-06	4.35817e-06
PLPPR3	154.828	1.27571	0.19643	6.49444	8.33423e-11	6.31209e-10
SYT5	18.602	1.06203	0.254645	4.17063	3.0376e-05	0.000104835
TNNI3	169.499	1.32718	0.222653	5.96073	2.51106e-09	1.57133e-08
FAM155B	11.278	2.06958	0.187192	11.0559	2.05223e-28	9.42913e-27
TSPAN16	12.0634	-1.08107	0.19108	-5.6577	1.53413e-08	8.53746e-08
DPP6	53.9046	-1.54082	0.145912	-10.5599	4.57066e-26	1.66201e-24
KIF1A	3.47422	1.15663	0.268272	4.31141	1.62217e-05	5.86889e-05
USHBP1	573.415	-1.31635	0.105102	-12.5245	5.48223e-36	5.13897e-34
BMP15	4.94655	2.03404	0.313263	6.49308	8.41017e-11	6.3567e-10
STK33	939.924	1.09922	0.153122	7.17877	7.03418e-13	7.03192e-12
CACNG6	326.5	1.83599	0.265055	6.92685	4.30318e-12	3.8816e-11
GDF15	2954.64	1.47338	0.158874	9.27387	1.79505e-20	4.00537e-19
HRC	20.1398	1.00548	0.256874	3.91432	9.06604e-05	0.0002884
COL5A1	2343.5	1.11211	0.130332	8.53296	1.42652e-17	2.38444e-16
HBZ	12.8717	-2.03193	0.233477	-8.7029	3.23503e-18	5.79138e-17
FIBCD1	110.191	-1.09095	0.144093	-7.57115	3.69943e-14	4.31037e-13
PNCK	90.0377	1.89077	0.17028	11.1039	1.20082e-28	5.68531e-27
DUSP9	9.20011	2.02556	0.223825	9.04977	1.43269e-19	2.98608e-18
NUTM2F	2.00302	-1.16988	0.22405	-5.22152	1.77465e-07	8.61193e-07
TTLL9	299.831	1.5185	0.224224	6.77224	1.26807e-11	1.07034e-10
HIGD1B	2827.16	-1.09092	0.124817	-8.74011	2.32886e-18	4.22182e-17
CCL25	8.17173	1.58191	0.257411	6.14546	7.97323e-10	5.3271e-09
PRR7	92.1898	1.07434	0.128093	8.3872	4.97859e-17	7.90388e-16
PDLIM4	1678.88	2.11114	0.144194	14.641	1.53875e-48	4.28414e-46
RAMP2	1268.85	-1.24832	0.114899	-10.8645	1.70146e-27	7.16457e-26
KRT34	0.658581	1.6477	0.44138	3.73307	0.00018916	0.00057366
KRT33B	0.351708	1.21745	0.47258	2.57618	0.00998995	0.0214494
TNS4	158.922	2.80071	0.220529	12.7	5.9154e-37	6.34171e-35
FMO5	807.637	-1.40928	0.13515	-10.4275	1.85623e-25	6.36509e-24
LRRC9	5.95972	1.1012	0.245708	4.48174	7.40385e-06	2.82436e-05
MATN3	46.0672	-1.92146	0.197542	-9.72684	2.31683e-22	6.06996e-21
PPARG	505.809	-1.05029	0.160021	-6.56347	5.25687e-11	4.0859e-10
FCRLA	127.756	2.80672	0.179873	15.6039	6.84902e-55	3.87156e-52
CNGA4	171.607	1.80051	0.240296	7.49287	6.73818e-14	7.59021e-13
RAMP1	353.148	1.32922	0.143298	9.27587	1.76169e-20	3.93564e-19
SERPINF1	5445.34	1.23233	0.104259	11.8199	3.08217e-32	1.94239e-30
POPDC3	27.0672	-1.80398	0.190366	-9.47638	2.63246e-21	6.27952e-20
ENAM	116.578	1.49968	0.146525	10.235	1.38192e-24	4.32523e-23
JCHAIN	42620.6	2.11546	0.199906	10.5823	3.60109e-26	1.33283e-24
ITGB4	1971.58	1.51684	0.110294	13.7528	4.90295e-43	8.31451e-41
SLC52A1	38.8255	1.80943	0.223375	8.10043	5.47647e-16	7.82821e-15
RGS22	218.796	1.3139	0.167643	7.83745	4.5977e-15	5.97669e-14
REEP2	81.6667	1.02839	0.112068	9.1765	4.4531e-20	9.65909e-19
SNAP25	167.514	1.84382	0.140645	13.1097	2.8963e-39	3.72603e-37
SSTR4	4.81709	-1.10767	0.230357	-4.80849	1.52074e-06	6.40935e-06
ATP1A4	24.8846	1.19887	0.150311	7.97592	1.51256e-15	2.07618e-14
FCRL2	39.4926	1.34061	0.138204	9.70022	3.00853e-22	7.7838e-21
ACY3	5.29781	1.38128	0.473483	2.91727	0.00353114	0.00846003
ALDH3B2	70.3825	1.80844	0.183091	9.87727	5.22373e-23	1.45655e-21
MMACHC	14.7222	1.05084	0.402674	2.60965	0.00906347	0.0197051
VSTM2L	34.7338	1.02038	0.152196	6.70442	2.02212e-11	1.65877e-10
TPTE2	16.7374	1.2852	0.135442	9.48896	2.33344e-21	5.60205e-20
GPR12	0.939129	1.51	0.389593	3.87583	0.000106261	0.000334604
CHRM3	50.888	-1.49141	0.126584	-11.782	4.83373e-32	2.99563e-30
CHIT1	2689.23	2.02494	0.267055	7.58246	3.39055e-14	3.97782e-13
DCLK1	225.519	1.46691	0.102112	14.3658	8.48685e-47	1.97892e-44
CCNA1	160.868	2.09789	0.23598	8.89013	6.10349e-19	1.18352e-17
RXFP2	7.31879	-1.21266	0.21478	-5.64606	1.64169e-08	9.1062e-08
POSTN	7441.53	2.31039	0.160096	14.4312	3.29108e-47	8.11361e-45
STOML3	318.646	1.71279	0.289378	5.91888	3.2415e-09	1.9871e-08
KL	21.9584	-1.27614	0.163808	-7.79047	6.676e-15	8.52973e-14
RNF128	45.655	-1.3329	0.196391	-6.78699	1.14499e-11	9.73056e-11
EPHB2	172.246	1.32444	0.100654	13.1584	1.52286e-39	1.98654e-37
PDZD2	374.169	-1.14782	0.0812732	-14.123	2.74173e-45	5.74655e-43
FAM83F	23.3703	2.81904	0.290688	9.69782	3.07997e-22	7.94658e-21
SEC14L4	195.549	-1.43533	0.136864	-10.4872	9.88672e-26	3.49293e-24
LRRIQ1	263.188	1.59347	0.24001	6.63919	3.15413e-11	2.52846e-10
DYDC2	738.647	1.82016	0.277254	6.56497	5.20445e-11	4.04684e-10
CA1	83.7806	-1.42564	0.183518	-7.76838	7.94987e-15	1.00677e-13
PEBP4	144.524	-1.34006	0.182075	-7.35993	1.84002e-13	1.96472e-12
ADAMDEC1	131.207	1.6628	0.236021	7.04516	1.85244e-12	1.7523e-11
CD180	126.413	1.06945	0.134874	7.92925	2.2048e-15	2.98032e-14
CNTN6	127.208	-1.62776	0.135739	-11.9918	3.92187e-33	2.70958e-31
REG4	0.937339	-1.06358	0.344829	-3.08437	0.00203986	0.00513655
HMGCS2	67.6843	-2.88061	0.272642	-10.5655	4.30503e-26	1.57463e-24
PTGFRN	839.014	1.8471	0.131263	14.0717	5.67177e-45	1.12555e-42
VTCN1	20.1194	2.26478	0.265176	8.54064	1.33475e-17	2.24109e-16
FKBP11	2441.05	1.25335	0.101882	12.302	8.83661e-35	7.35885e-33
SAA2	2957.36	1.74137	0.295013	5.90269	3.57625e-09	2.18011e-08
ANO3	10.6676	-1.30015	0.209981	-6.19176	5.94972e-10	4.05206e-09
FST	276.746	1.19483	0.143454	8.32897	8.15495e-17	1.26614e-15
ERN2	426.291	2.82735	0.22312	12.6719	8.46515e-37	8.87129e-35
IL2RA	183.441	1.04619	0.149232	7.01051	2.37456e-12	2.21697e-11
KCTD1	352.558	1.18962	0.102746	11.5783	5.3082e-31	2.9558e-29
KLRD1	247.568	-1.27902	0.122908	-10.4063	2.31974e-25	7.81089e-24
CYP2J2	18.6332	1.28802	0.26023	4.94954	7.43898e-07	3.29847e-06
DSC3	43.6687	3.93614	0.369579	10.6503	1.73753e-26	6.69665e-25
FHOD3	158.879	1.30676	0.153834	8.49457	1.98662e-17	3.28531e-16
CLDN10	38.1437	1.12072	0.244622	4.58142	4.61819e-06	1.819e-05
GOLM1	1404.26	1.36345	0.0841188	16.2087	4.37916e-59	3.14188e-56
PSAT1	10.2366	1.16252	0.332712	3.49406	0.000475731	0.0013495
TBX3	447.175	-1.26336	0.126551	-9.98301	1.80901e-23	5.17566e-22
HRK	29.6103	1.38772	0.188427	7.36477	1.77458e-13	1.90029e-12
CCDC146	639.458	1.35313	0.150616	8.98401	2.61063e-19	5.30486e-18
CD36	3657.42	-1.01918	0.114646	-8.88983	6.12018e-19	1.18552e-17
ITGA7	1925.32	1.38264	0.12923	10.699	1.0284e-26	4.05575e-25
KRT85	2.34876	-1.10139	0.231986	-4.74763	2.05811e-06	8.48442e-06
FAIM2	64.6302	1.34676	0.199253	6.75905	1.38902e-11	1.16506e-10
KCNH3	42.4727	1.21128	0.250296	4.83939	1.30236e-06	5.57974e-06
PKIB	288.243	1.21975	0.138468	8.80887	1.26411e-18	2.36516e-17
STX11	1110.32	-1.21643	0.0975568	-12.4689	1.10339e-35	9.94327e-34
EGR4	4.45687	1.33084	0.31593	4.21246	2.52603e-05	8.84229e-05
KCNMB4	38.7809	-1.56322	0.187542	-8.33528	7.73138e-17	1.20385e-15
SLC19A3	39.7323	-1.57975	0.128667	-12.2778	1.19184e-34	9.70853e-33
SERPINE2	761.496	1.31333	0.152241	8.6267	6.3149e-18	1.10195e-16
WNT10A	21.5086	1.56963	0.181222	8.66137	4.66125e-18	8.21067e-17
USP44	59.0317	-1.06195	0.138454	-7.67002	1.71968e-14	2.0844e-13
THSD1	128.394	-1.12056	0.109369	-10.2456	1.23826e-24	3.88211e-23
LMO7	8330.27	-1.08649	0.0997169	-10.8957	1.20815e-27	5.1454e-26
SCEL	1681.25	-1.21438	0.15898	-7.63859	2.19605e-14	2.62597e-13
EDNRB	2196.08	-1.46528	0.108441	-13.5123	1.32352e-41	2.04042e-39
RAPGEF5	1802.21	-1.06153	0.103554	-10.2509	1.17236e-24	3.69411e-23
MYCBPAP	370.835	1.18729	0.172539	6.88131	5.93053e-12	5.25299e-11
SCN7A	725.56	-1.08455	0.120955	-8.96659	3.05843e-19	6.14784e-18
BLK	181.287	1.42361	0.145362	9.79357	1.19978e-22	3.21561e-21
GATA4	10.3232	1.584	0.303251	5.22342	1.75651e-07	8.52836e-07
IL36RN	1.43031	2.53713	0.520519	4.87424	1.09228e-06	4.72418e-06
IL36B	1.46979	1.32267	0.432092	3.06109	0.00220534	0.00551083
KLF4	3122.41	-1.18862	0.136165	-8.72924	2.5638e-18	4.62974e-17
BAAT	55.9605	3.35109	0.191128	17.5332	7.99513e-69	1.65712e-65
WDR38	1134.07	1.79828	0.281687	6.38396	1.7257e-10	1.25355e-09
HEMGN	17.1342	-1.24532	0.20832	-5.97793	2.25989e-09	1.42083e-08
NR5A1	0.854999	-1.1576	0.321452	-3.60117	0.000316783	0.000926218
LMX1B	6.93486	1.45621	0.17261	8.43642	3.2721e-17	5.27552e-16
SPAG8	924.461	1.37892	0.192033	7.18063	6.93923e-13	6.9519e-12
TFAP2A	68.8587	2.52073	0.216294	11.6542	2.18504e-31	1.25415e-29
CAPN11	32.4434	1.24612	0.151375	8.23202	1.84078e-16	2.74923e-15
IRF4	62.1825	1.31281	0.232095	5.65636	1.54614e-08	8.59404e-08
FGFBP1	391.737	1.23313	0.207992	5.92875	3.05244e-09	1.88182e-08
TTC29	271.137	1.67858	0.266179	6.30623	2.85923e-10	2.02183e-09
LRRC32	4513.26	-1.26319	0.130479	-9.68117	3.62551e-22	9.27713e-21
PI15	5.2351	2.2545	0.406698	5.54341	2.96636e-08	1.59558e-07
TTPA	20.1228	-1.42642	0.112531	-12.6759	8.04553e-37	8.47917e-35
SULF1	1104.17	1.99301	0.122032	16.3318	5.86388e-60	4.75586e-57
NXPE4	17.1445	2.56715	0.20976	12.2385	1.93568e-34	1.54309e-32
TMPRSS4	721.417	3.51937	0.22105	15.9212	4.51842e-57	2.71893e-54
MMP7	55.9369	1.75488	0.162545	10.7963	3.58444e-27	1.47278e-25
CFAP300	536.192	1.68777	0.190174	8.87483	7.00399e-19	1.34971e-17
TRIM29	1047.83	1.6629	0.186641	8.90966	5.11892e-19	1.00093e-17
BTG4	40.0113	1.5572	0.301335	5.16767	2.37031e-07	1.12997e-06
MMP13	24.0158	3.31289	0.333114	9.94522	2.64598e-23	7.48984e-22
CASP5	75.0692	-1.10685	0.152984	-7.23508	4.65247e-13	4.75026e-12
ITGA11	46.3021	1.12144	0.124564	9.00293	2.19774e-19	4.49525e-18
SMAD6	497.817	-1.37445	0.174974	-7.85517	3.99224e-15	5.22605e-14
STRA6	116.501	2.80652	0.192325	14.5926	3.13062e-48	8.22515e-46
SEMA6D	310.098	-1.11149	0.100649	-11.0432	2.36438e-28	1.07331e-26
BCL2L10	5.34718	1.84111	0.205923	8.94081	3.86338e-19	7.65862e-18
GCOM1	163.216	-1.9062	0.154985	-12.2993	9.1362e-35	7.57452e-33
SLC44A5	40.7433	1.24388	0.216065	5.75699	8.5627e-09	4.94669e-08
CLCA2	6.63007	1.83345	0.456269	4.01835	5.86071e-05	0.000191531
CGREF1	59.6671	1.26388	0.176041	7.17947	6.99825e-13	6.99975e-12
LHCGR	4.54375	1.08458	0.226704	4.78412	1.71738e-06	7.17331e-06
GPR87	206.07	4.10828	0.27316	15.0399	4.02454e-51	1.39025e-48
PLA2G12B	64.7685	-1.54229	0.20047	-7.69339	1.43284e-14	1.75267e-13
ADAMTS14	53.2484	2.67001	0.302731	8.81977	1.14699e-18	2.15251e-17
MDH1B	275.042	1.60182	0.213012	7.51987	5.48288e-14	6.26701e-13
CCDC54	5.80837	-1.48881	0.162423	-9.16626	4.89736e-20	1.05981e-18
MNS1	27.1361	1.18408	0.254997	4.64352	3.4252e-06	1.3714e-05
PCDH10	11.5424	-1.17841	0.191123	-6.16573	7.01583e-10	4.71956e-09
NDST4	1.5271	1.75312	0.308346	5.68555	1.3039e-08	7.33281e-08
PRKG2	81.2505	-1.23757	0.128079	-9.66258	4.34772e-22	1.10494e-20
BMPR1B	116.057	1.17761	0.17592	6.69402	2.17116e-11	1.77791e-10
TRPC3	16.6628	-1.45758	0.211629	-6.88741	5.68157e-12	5.04685e-11
ANXA3	1733.37	-1.37991	0.114212	-12.082	1.31478e-33	9.54313e-32
SLC39A8	992.457	-1.38533	0.112931	-12.2671	1.36069e-34	1.09407e-32
MTTP	24.3391	1.26738	0.175712	7.21282	5.48058e-13	5.54419e-12
TTLL8	1.57183	2.03771	0.499595	4.07872	4.52848e-05	0.000151252
CD27	680.465	2.00543	0.144448	13.8835	7.97783e-44	1.43095e-41
ANP32D	1.28915	-1.21942	0.342343	-3.562	0.000368045	0.00106459
LGR5	13.1709	-1.28275	0.196445	-6.52984	6.58414e-11	5.04604e-10
PTPRQ	64.6046	-1.84257	0.1677	-10.9873	4.39976e-28	1.94486e-26
KERA	10.7989	1.71243	0.176953	9.6773	3.76519e-22	9.60819e-21
FOXN4	7.43005	1.52774	0.273444	5.58702	2.31e-08	1.25665e-07
ACVRL1	4553.86	-1.31407	0.108099	-12.1562	5.31667e-34	4.06464e-32
MORN3	206.518	1.22083	0.168196	7.25837	3.91773e-13	4.03704e-12
SYT16	5.65613	1.92816	0.152594	12.6359	1.33865e-36	1.32825e-34
ESR2	84.1629	1.26092	0.102277	12.3286	6.35683e-35	5.41463e-33
SLC27A2	66.604	1.26055	0.262343	4.80497	1.54774e-06	6.50845e-06
GCNT3	89.1859	2.37977	0.184717	12.8833	5.58924e-38	6.51635e-36
CYP1A1	19.1589	-1.03991	0.331468	-3.13729	0.00170519	0.0043502
CCDC33	562.477	1.75291	0.272553	6.43148	1.26371e-10	9.38428e-10
WDR93	46.6565	1.09844	0.181243	6.06062	1.35601e-09	8.7891e-09
ST8SIA2	1.45799	2.11629	0.431851	4.90053	9.55806e-07	4.16385e-06
SH3GL3	66.3666	-1.59946	0.166663	-9.59696	8.2341e-22	2.04799e-20
NKD1	76.6475	-1.96663	0.17691	-11.1166	1.04198e-28	4.98389e-27
CHST4	25.9076	1.4214	0.169306	8.39542	4.64222e-17	7.37615e-16
ADAMTS18	3.83534	3.65034	0.409106	8.92273	4.5494e-19	8.95196e-18
CDH13	375.563	-1.41214	0.117063	-12.0631	1.6535e-33	1.18633e-31
MYOCD	229.298	1.00197	0.132154	7.58182	3.40729e-14	3.99495e-13
LRRC46	385.041	1.68277	0.250965	6.7052	2.01127e-11	1.6506e-10
SPACA3	13.4283	1.29771	0.143376	9.05111	1.41528e-19	2.95309e-18
GNAL	28.5182	1.02142	0.169294	6.03343	1.6052e-09	1.02898e-08
ADCYAP1	118.851	2.16339	0.254997	8.48398	2.17619e-17	3.58416e-16
SLC14A1	248.308	-2.4432	0.214523	-11.389	4.74506e-30	2.47247e-28
SLC13A5	8.80223	1.15467	0.14902	7.74838	9.30704e-15	1.16597e-13
FBXO15	381.242	1.28169	0.177109	7.23673	4.59631e-13	4.69548e-12
PNMT	270.076	-2.14559	0.210635	-10.1863	2.28321e-24	7.01663e-23
PLPP2	783.498	1.98688	0.170219	11.6725	1.76244e-31	1.01785e-29
DNMT3L	3.23283	1.00436	0.343542	2.92355	0.00346062	0.00831136
CBLC	146.191	1.24775	0.125844	9.91509	3.57924e-23	1.00857e-21
FBN3	112.946	-1.25563	0.18575	-6.75975	1.38226e-11	1.16147e-10
KLK3	1.00598	-1.62515	0.538657	-3.01704	0.00255255	0.00629998
ZNF473	526.938	1.14557	0.155993	7.34371	2.07759e-13	2.20201e-12
AC020909.1	10.9395	1.3919	0.331164	4.20306	2.63329e-05	9.19187e-05
SLC2A5	106.49	2.07763	0.143636	14.4645	2.03091e-47	5.11954e-45
MMEL1	293.69	-1.11118	0.119032	-9.33513	1.00869e-20	2.30873e-19
CFAP74	332.84	1.46912	0.198393	7.40514	1.31015e-13	1.42837e-12
PADI3	3.62351	3.81605	0.39958	9.55015	1.29505e-21	3.17031e-20
FHAD1	532.377	1.35395	0.191683	7.06351	1.62351e-12	1.55228e-11
PADI1	5.80405	2.88738	0.358789	8.04756	8.44623e-16	1.19e-14
DMRTA2	1.38229	1.59816	0.404373	3.9522	7.7436e-05	0.000248579
FCN3	22252.5	-2.26117	0.212267	-10.6525	1.6978e-26	6.55708e-25
GPA33	15.0998	-1.01854	0.376171	-2.70766	0.00677591	0.0151774
NECTIN4	78.5309	1.03971	0.152498	6.81788	9.23942e-12	7.96349e-11
FCRL5	373.694	2.54983	0.14197	17.9603	3.9857e-72	1.23915e-68
CRABP2	52.1747	1.28043	0.202615	6.31955	2.62327e-10	1.86702e-09
FAM163A	4.32418	1.95824	0.211053	9.27846	1.7195e-20	3.85524e-19
LHX9	15.1637	-1.46569	0.304364	-4.8156	1.46757e-06	6.20912e-06
DTL	59.0297	-1.02269	0.201429	-5.07717	3.83098e-07	1.77328e-06
SUSD4	232.415	1.22559	0.128559	9.53333	1.5232e-21	3.70936e-20
S100A8	776.446	-1.13754	0.189083	-6.01607	1.78707e-09	1.13657e-08
S100A7	3.50589	-1.10575	0.461894	-2.39394	0.0166686	0.0337937
KCNN3	69.7364	2.12999	0.168819	12.617	1.70189e-36	1.66215e-34
MAP3K21	99.3736	-1.14853	0.0842129	-13.6384	2.36655e-42	3.85812e-40
OSR1	97.4557	1.01676	0.137287	7.40608	1.30086e-13	1.41907e-12
DQX1	24.0581	1.70708	0.165274	10.3288	5.22058e-25	1.69956e-23
CNGA3	16.6105	1.64532	0.24987	6.58469	4.55849e-11	3.56986e-10
AFF3	295.517	-1.74426	0.114333	-15.2559	1.50298e-52	6.09491e-50
GPR17	445.878	-1.42288	0.157909	-9.01078	2.04594e-19	4.20319e-18
GALNT13	14.9104	-1.68947	0.198335	-8.51828	1.61939e-17	2.69475e-16
SCN1A	164.051	-1.53567	0.160475	-9.56956	1.07361e-21	2.65259e-20
ZNF385B	702.459	-1.66712	0.15859	-10.5121	7.59527e-26	2.70903e-24
CDCA7	94.6073	1.11705	0.130766	8.54236	1.31503e-17	2.21196e-16
CSRNP1	6.48714	-1.02616	0.373226	-2.74942	0.00597002	0.0135365
TAGLN3	32.0997	1.38621	0.261276	5.30552	1.12351e-07	5.61422e-07
BOC	626.125	1.40897	0.113471	12.417	2.11351e-35	1.88638e-33
TM4SF19	276.711	1.3376	0.184665	7.24342	4.37516e-13	4.48183e-12
MUC4	1288.9	2.63863	0.198759	13.2755	3.21013e-40	4.43569e-38
SLIT2	297.942	-1.25188	0.110549	-11.3242	9.95327e-30	5.0868e-28
SLC10A6	43.4854	1.34182	0.130944	10.2472	1.2176e-24	3.8302e-23
ANK2	787.337	1.34068	0.12652	10.5966	3.09071e-26	1.16004e-24
ROPN1L	332.431	1.58043	0.229455	6.88778	5.66707e-12	5.03638e-11
ADAMTS16	74.9737	2.50238	0.19781	12.6504	1.11292e-36	1.12828e-34
OTULINL	633.128	-1.70027	0.115051	-14.7784	2.02026e-49	6.17801e-47
SHISAL2B	13.2292	2.69222	0.295406	9.11362	7.96774e-20	1.6909e-18
ADAMTS19	7.04275	1.6623	0.271894	6.11377	9.73063e-10	6.4185e-09
CXCL14	1482.46	2.50142	0.198027	12.6317	1.41201e-36	1.3863e-34
TIMD4	10.6551	1.369	0.352768	3.88072	0.000104147	0.00032828
GABRB2	38.9369	-1.02491	0.138894	-7.37909	1.59371e-13	1.7125e-12
MLIP	31.3336	2.136	0.17589	12.1439	6.18058e-34	4.66771e-32
LGSN	38.1236	1.70355	0.205778	8.27856	1.24674e-16	1.89541e-15
TCTE1	14.752	1.41751	0.343655	4.1248	3.71057e-05	0.000125895
TPBG	504.356	1.28062	0.079102	16.1895	5.98495e-59	4.13493e-56
GABRR1	2.12412	1.26459	0.309028	4.09215	4.27385e-05	0.000143451
SLC2A12	109.037	-1.02673	0.111047	-9.24597	2.33121e-20	5.15852e-19
PNLDC1	9.81242	1.38385	0.396512	3.49005	0.000482923	0.00136782
VIP	12.977	-1.3369	0.231206	-5.78228	7.36952e-09	4.29732e-08
NLGN4X	37.4245	-1.02857	0.161643	-6.3632	1.97592e-10	1.42532e-09
MSN	306.178	-1.19315	0.107719	-11.0764	1.63276e-28	7.59537e-27
CPXCR1	1.8422	1.75775	0.290759	6.04536	1.49075e-09	9.62231e-09
NXF3	286.446	-1.83095	0.146605	-12.489	8.56957e-36	7.83612e-34
FATE1	13.9803	-1.43859	0.20983	-6.85601	7.08114e-12	6.18407e-11
CHRNA6	4.09647	1.10561	0.220342	5.01772	5.22896e-07	2.37326e-06
STAR	16.1578	1.14828	0.13414	8.56032	1.12559e-17	1.90534e-16
PXDNL	6.02698	1.35037	0.302687	4.46126	8.14782e-06	3.08922e-05
TRIM55	37.7175	1.76298	0.178895	9.85484	6.53197e-23	1.80248e-21
DPYS	86.0725	1.26721	0.167963	7.5446	4.53679e-14	5.23696e-13
RSPO2	181.522	-1.02608	0.14533	-7.06034	1.66097e-12	1.58323e-11
FAM83A	102.445	3.2774	0.191735	17.0933	1.66376e-65	2.58631e-62
GSDMC	117.704	1.55923	0.15568	10.0156	1.3022e-23	3.78957e-22
ARHGAP39	177.836	1.20421	0.150286	8.01281	1.12113e-15	1.55491e-14
CER1	2.35258	1.11877	0.286427	3.90594	9.38592e-05	0.000297865
CDKN2B	266.548	-1.02801	0.140762	-7.30317	2.81076e-13	2.94395e-12
CDKN2A	284.265	1.12188	0.122047	9.19224	3.84739e-20	8.38425e-19
PLPPR1	64.2921	-1.16772	0.183984	-6.34688	2.19732e-10	1.5777e-09
CRB2	0.698125	2.25509	0.480497	4.69324	2.6891e-06	1.09406e-05
LCN2	703.761	1.559	0.20208	7.71475	1.2122e-14	1.49652e-13
HMCN2	335.099	1.00161	0.154636	6.47721	9.34331e-11	7.03067e-10
CACNA1B	2.53804	1.11014	0.227969	4.86969	1.11773e-06	4.83087e-06
ST8SIA6	156.432	-1.47627	0.141265	-10.4504	1.45981e-25	5.04282e-24
CDHR1	28.7531	1.27863	0.145772	8.77143	1.76417e-18	3.23905e-17
LRIT1	0.986257	-1.93643	0.393531	-4.92065	8.62562e-07	3.7806e-06
RGR	11.3953	-1.02836	0.23805	-4.31994	1.56071e-05	5.66081e-05
ANKRD1	1854.43	-1.99211	0.274361	-7.26091	3.84488e-13	3.97354e-12
HABP2	16.5566	1.73711	0.322406	5.38797	7.12597e-08	3.65187e-07
PLEKHS1	794.468	2.57879	0.273071	9.44366	3.59991e-21	8.4896e-20
ADAM12	122.404	1.93156	0.16006	12.0677	1.56496e-33	1.12713e-31
LRRC4C	64.0858	1.22224	0.113696	10.75	5.92359e-27	2.37383e-25
SCGB1A1	300.571	1.40585	0.286332	4.90987	9.11368e-07	3.98422e-06
SYT8	1372.93	2.24335	0.189405	11.8442	2.30706e-32	1.47383e-30
ZNF215	69.4906	1.49513	0.118536	12.6133	1.78429e-36	1.73355e-34
PAMR1	427.233	1.4736	0.140153	10.5142	7.42792e-26	2.65951e-24
TENM4	52.3452	1.24988	0.106438	11.7428	7.68568e-32	4.59515e-30
ZC3H12C	8.97617	-1.1278	0.235837	-4.78212	1.73459e-06	7.23869e-06
DRD2	14.7717	1.88805	0.202281	9.33378	1.02158e-20	2.33251e-19
GLB1L2	369.22	1.02297	0.118547	8.62927	6.1746e-18	1.07948e-16
P4HA3	55.5524	1.15041	0.131035	8.77943	1.64298e-18	3.03749e-17
GGTLC1	1508.43	-2.12291	0.165313	-12.8417	9.5715e-38	1.0821e-35
SLC22A8	2.29685	-1.25835	0.359908	-3.49632	0.00047173	0.00133855
MS4A3	25.1581	-1.15519	0.200044	-5.77469	7.70945e-09	4.48711e-08
PLCH2	392.59	1.99897	0.160997	12.4162	2.13502e-35	1.89651e-33
ESAM	1904.09	-1.26561	0.0859276	-14.7288	4.21227e-49	1.26735e-46
KIAA1755	212.613	1.40326	0.144672	9.69959	3.02723e-22	7.82133e-21
OCSTAMP	1.93522	2.43256	0.341366	7.12595	1.03364e-12	1.01429e-11
DOC2A	343.683	1.51462	0.203422	7.4457	9.64287e-14	1.06563e-12
HMGA2	12.8125	1.59432	0.159693	9.98364	1.79743e-23	5.15044e-22
MMP3	9.85671	2.71219	0.505343	5.36703	8.00458e-08	4.07303e-07
CNTN5	18.9807	1.58221	0.232375	6.80885	9.83801e-12	8.44927e-11
KLRF1	68.0522	-2.05015	0.177266	-11.5654	6.17101e-31	3.40574e-29
FXYD4	77.383	-1.87901	0.217794	-8.62746	6.2729e-18	1.09564e-16
LYPD1	102.099	1.60141	0.151504	10.5701	4.10002e-26	1.50259e-24
GPM6A	629.274	-1.3658	0.112256	-12.1669	4.66445e-34	3.58068e-32
SPATA4	134.394	1.7323	0.24845	6.97242	3.11529e-12	2.85987e-11
PIH1D2	359.574	1.40011	0.179681	7.7922	6.58538e-15	8.41972e-14
C2orf50	146.305	1.45928	0.228431	6.38826	1.67785e-10	1.22069e-09
ENKUR	383.068	1.74489	0.257137	6.78585	1.15409e-11	9.79949e-11
GPR158	7.69406	-1.40917	0.188382	-7.48037	7.41129e-14	8.3183e-13
MAT1A	25.41	1.49829	0.271726	5.51396	3.50845e-08	1.86884e-07
THRSP	10.8577	2.13213	0.279878	7.61806	2.57518e-14	3.06361e-13
MSGN1	1.23868	1.56528	0.604937	2.58751	0.00966713	0.0208475
ATP6V1G3	1.27617	1.874	0.750893	2.4957	0.0125709	0.026292
TEX9	503.406	1.02741	0.115934	8.86197	7.86149e-19	1.50563e-17
WWC2	971.605	-1.41422	0.0944139	-14.979	1.00775e-50	3.35689e-48
ZNF385D	229.299	2.2959	0.186333	12.3215	6.93997e-35	5.85783e-33
TDO2	70.2516	1.72696	0.242911	7.10942	1.16534e-12	1.13693e-11
GFRA1	227.202	1.03583	0.127967	8.09453	5.74851e-16	8.21077e-15
CCDC74B	359.336	1.46482	0.217153	6.74556	1.52438e-11	1.26889e-10
ASTN1	2.07517	1.35921	0.270919	5.01705	5.24717e-07	2.37979e-06
GRID2	3.06103	-1.85332	0.242048	-7.6568	1.90627e-14	2.29416e-13
G6PC2	7.23137	-1.33365	0.197318	-6.75888	1.39067e-11	1.16591e-10
PDK1	369.747	1.17549	0.0998086	11.7774	5.10171e-32	3.15123e-30
OLAH	70.741	-1.82315	0.19306	-9.44341	3.60831e-21	8.49866e-20
DMP1	2.4647	1.91986	0.310259	6.18792	6.09631e-10	4.14584e-09
MEPE	5.7854	1.12009	0.298524	3.75209	0.000175365	0.000534871
CAPSL	1259.04	1.86111	0.289589	6.42673	1.30381e-10	9.67047e-10
CCNO	160.889	2.03799	0.276926	7.35933	1.84838e-13	1.97252e-12
CNTNAP4	0.873741	1.79071	0.352356	5.0821	3.73278e-07	1.72997e-06
RAB3C	71.495	2.18384	0.180405	12.1052	9.91404e-34	7.25241e-32
LMNTD1	128.738	1.4457	0.246787	5.85808	4.68247e-09	2.80497e-08
CPB1	42.9813	1.16443	0.200699	5.80184	6.55897e-09	3.84752e-08
ACOXL	364.528	-1.15601	0.127222	-9.08649	1.02286e-19	2.15355e-18
CLGN	23.2663	1.04809	0.212008	4.94364	7.66754e-07	3.39042e-06
SYCP2L	75.8401	-1.37243	0.149072	-9.20644	3.37126e-20	7.37252e-19
CCDC148	84.447	1.06429	0.161559	6.58761	4.46958e-11	3.50612e-10
SCN3A	12.1145	1.10044	0.205561	5.35336	8.63343e-08	4.37631e-07
ADGRF4	20.9681	2.36018	0.181785	12.9834	1.52028e-38	1.82963e-36
FAM81B	754.469	1.66371	0.24131	6.89448	5.40628e-12	4.81608e-11
FAM92B	1037.73	1.84825	0.267196	6.9172	4.60656e-12	4.13527e-11
TMPRSS11D	3.69282	1.01273	0.318051	3.18416	0.00145174	0.00375237
KCNJ16	94.7762	1.528	0.195444	7.8181	5.36265e-15	6.92283e-14
ANKFN1	98.2279	1.54893	0.208365	7.43372	1.05585e-13	1.162e-12
ANKRD29	1142.5	-1.50845	0.103088	-14.6325	1.74149e-48	4.77732e-46
CHST9	397.079	1.86057	0.295833	6.28924	3.19015e-10	2.2355e-09
THY1	3885.44	2.2504	0.182091	12.3586	4.37634e-35	3.76204e-33
DNAAF1	1430.44	1.84124	0.223377	8.24274	1.68306e-16	2.52785e-15
ROBO4	2495.38	-1.07795	0.108525	-9.93275	2.99874e-23	8.47553e-22
GAL3ST2	6.96891	1.1961	0.248176	4.81955	1.4388e-06	6.10678e-06
DISP1	388.329	-1.19243	0.0942532	-12.6514	1.09902e-36	1.12028e-34
FAM167A	48.5469	-2.98916	0.186772	-16.0043	1.19216e-57	7.66847e-55
SH3RF1	14.3641	-1.01446	0.272683	-3.72028	0.000198998	0.000601152
GPR26	0.962829	1.17097	0.252045	4.64587	3.38653e-06	1.35796e-05
CCDC173	51.1009	1.36443	0.316042	4.31726	1.57976e-05	5.71989e-05
C10orf90	1.26801	1.39383	0.308787	4.51389	6.36493e-06	2.45161e-05
MAGED4	107.22	1.36736	0.0986286	13.8638	1.05e-43	1.8654e-41
WNT7A	91.1463	-1.58893	0.127389	-12.473	1.04822e-35	9.49199e-34
RSPH10B	190.185	1.64152	0.234311	7.00572	2.45725e-12	2.28844e-11
PROM2	178.447	2.22031	0.153858	14.4309	3.30564e-47	8.11361e-45
GRIA1	227.453	-1.83113	0.123677	-14.8058	1.34383e-49	4.17797e-47
LRGUK	52.1289	1.35425	0.176266	7.68298	1.55432e-14	1.89382e-13
ALS2CR12	247.834	1.01254	0.170227	5.94818	2.71147e-09	1.68824e-08
SPAG17	666.767	1.76617	0.249242	7.08614	1.37904e-12	1.33081e-11
PPARGC1B	49.2568	-1.3064	0.134784	-9.69252	3.24412e-22	8.33552e-21
ADCY8	22.0323	-2.3381	0.201469	-11.6053	3.87541e-31	2.17747e-29
RAET1L	6.59307	1.39459	0.241864	5.766	8.11753e-09	4.70993e-08
AFF2	63.3959	-1.32702	0.125867	-10.543	5.47249e-26	1.97454e-24
CFAP70	730.76	1.25154	0.1955	6.40172	1.53633e-10	1.12387e-09
UGT2B4	31.7863	-1.12474	0.224318	-5.01403	5.33014e-07	2.41566e-06
MMP16	1.7142	1.13924	0.447195	2.54753	0.0108489	0.0231022
SLC28A1	2.67238	1.00896	0.202598	4.98012	6.35453e-07	2.84809e-06
CXCL13	845.189	4.12738	0.283607	14.5532	5.57612e-48	1.44468e-45
CLDN8	104.624	1.17397	0.276688	4.24293	2.20622e-05	7.81372e-05
FUT6	47.458	1.93273	0.206858	9.34328	9.33922e-21	2.14814e-19
KCNS2	13.9016	1.9521	0.179291	10.8879	1.31661e-27	5.59456e-26
LRFN2	1.06711	-1.12681	0.254458	-4.42829	9.49836e-06	3.56289e-05
PRG3	5.36573	-1.47722	0.601363	-2.45646	0.0140315	0.02897
UNC5D	2.9647	-2.29536	0.235679	-9.73935	2.04862e-22	5.38997e-21
GLYATL2	7.02181	2.14853	0.298454	7.19887	6.07151e-13	6.11214e-12
MS4A1	649.332	2.3085	0.211176	10.9317	8.13356e-28	3.52026e-26
FBXO32	575.555	1.352	0.105105	12.8633	7.24012e-38	8.28572e-36
ATP2B2	1.10345	1.16512	0.456888	2.55011	0.0107688	0.0229394
LYZL4	1.06716	-1.60536	0.440425	-3.64501	0.000267377	0.000790436
KLHL40	0.564592	1.82823	0.522291	3.50041	0.00046454	0.00131916
SYN2	55.934	-1.6374	0.14086	-11.6243	3.10068e-31	1.76342e-29
STEAP2	496.995	1.17594	0.114606	10.2608	1.05875e-24	3.35311e-23
C1orf158	210.444	1.63596	0.283826	5.76394	8.21735e-09	4.76193e-08
HYDIN	238.289	1.40521	0.190007	7.39556	1.40815e-13	1.52541e-12
CACNA2D3	91.8373	-1.06178	0.102817	-10.3269	5.32779e-25	1.72843e-23
DGKI	18.5618	1.44257	0.147707	9.76641	1.56917e-22	4.17565e-21
SVOPL	57.2647	1.06614	0.153169	6.96057	3.38903e-12	3.09593e-11
SNX22	154.025	-1.95876	0.16743	-11.699	1.29014e-31	7.4973e-30
ACAN	65.6458	1.86721	0.190275	9.81322	9.87662e-23	2.67789e-21
DRC1	63.2093	1.64018	0.320641	5.11533	3.13197e-07	1.46536e-06
CIB4	9.22065	-1.02852	0.312219	-3.29423	0.000986926	0.00263378
WDR66	500.922	1.29941	0.159301	8.15698	3.43515e-16	5.01402e-15
GRHL3	24.7844	2.02685	0.168513	12.0279	2.53568e-33	1.77822e-31
LRRC43	172.775	1.49615	0.21187	7.06166	1.64521e-12	1.57062e-11
RHBDL2	73.3999	1.03509	0.104668	9.88927	4.634e-23	1.29405e-21
RIBC1	232.071	1.26934	0.198514	6.39419	1.61405e-10	1.17611e-09
DNAH3	198.227	1.78941	0.231422	7.73223	1.05675e-14	1.3133e-13
ALAS2	58.6786	-1.58044	0.247161	-6.39438	1.61204e-10	1.17511e-09
ITLN2	957.778	-4.14002	0.244395	-16.9399	2.28525e-64	3.04493e-61
STC1	4.99698	-1.16627	0.369802	-3.15377	0.00161175	0.00413103
CLIC6	1037.6	1.61406	0.137866	11.7074	1.16765e-31	6.84945e-30
GIP	0.698193	2.53809	0.62567	4.05659	4.97949e-05	0.000165251
CLDN14	38.6995	2.36054	0.203078	11.6238	3.11861e-31	1.76822e-29
PGLYRP3	2.0289	3.06175	0.354678	8.63247	6.00395e-18	1.05162e-16
CCDC17	1454.43	1.76754	0.230252	7.67656	1.63421e-14	1.98596e-13
DRC7	278.794	1.82234	0.246225	7.40112	1.35041e-13	1.46969e-12
ACE	1491.86	-1.23187	0.140082	-8.79392	1.44437e-18	2.67825e-17
LRRC36	879.445	-1.13934	0.154084	-7.39428	1.42175e-13	1.53926e-12
AGRP	249.602	-1.68179	0.171351	-9.81484	9.71879e-23	2.63893e-21
TNFRSF13C	113.292	2.53514	0.188878	13.4221	4.4902e-41	6.59529e-39
CPAMD8	988.511	-1.08694	0.0888312	-12.236	1.99653e-34	1.57811e-32
CILP2	57.7063	2.8652	0.185562	15.4406	8.72413e-54	4.28263e-51
TFF3	2198.03	1.32335	0.195915	6.75472	1.43108e-11	1.19603e-10
RSPH1	1270.09	1.84719	0.269327	6.85853	6.95724e-12	6.08725e-11
AIRE	4.07287	1.27718	0.16265	7.85232	4.08422e-15	5.33896e-14
C21orf58	658.672	1.41261	0.18554	7.61352	2.66733e-14	3.16718e-13
C9orf116	141.769	1.16672	0.153448	7.60332	2.8862e-14	3.41836e-13
LCN1	4.43064	-1.28512	0.295773	-4.34494	1.39315e-05	5.09365e-05
CFAP157	1356.3	1.71522	0.244159	7.025	2.14063e-12	2.01267e-11
BRSK1	162.298	1.07584	0.0915929	11.7459	7.40903e-32	4.45832e-30
COX6B2	25.3423	1.27548	0.157616	8.09232	5.85379e-16	8.35475e-15
LRRC71	233.34	1.50055	0.220092	6.81783	9.2425e-12	7.96349e-11
FGFR4	1100.89	-1.25348	0.121545	-10.3129	6.16198e-25	1.98868e-23
SCGB3A1	314.064	2.29076	0.220025	10.4114	2.20023e-25	7.46237e-24
NPHS1	3.53579	1.20067	0.25031	4.79672	1.61282e-06	6.7684e-06
MPP3	1176.45	-1.30264	0.106654	-12.2137	2.62722e-34	2.06786e-32
CD300LG	190.359	-1.68898	0.171741	-9.83448	7.99775e-23	2.18433e-21
AQP5	152.784	2.13852	0.213574	10.013	1.33638e-23	3.87696e-22
GRASP	3973.53	-1.07893	0.110243	-9.78681	1.28273e-22	3.42809e-21
ALOX15	796.494	1.71111	0.273009	6.26758	3.66702e-10	2.5575e-09
FGF11	61.7682	1.39824	0.126823	11.0251	2.89047e-28	1.29925e-26
CCDC78	1722.73	1.65921	0.236258	7.02288	2.17337e-12	2.03934e-11
SSTR5	0.685815	2.44806	0.443902	5.51487	3.49035e-08	1.86026e-07
HS3ST6	64.3521	1.79732	0.279322	6.43457	1.23822e-10	9.21327e-10
ZG16B	298.948	1.5073	0.200757	7.50809	5.99972e-14	6.81186e-13
CYP4A22	5.36907	-1.58065	0.220537	-7.16728	7.65e-13	7.60677e-12
TAL1	729.689	-1.37654	0.103417	-13.3106	2.00858e-40	2.81715e-38
KNCN	2.80468	1.48764	0.356746	4.17004	3.04552e-05	0.000105089
WNT4	31.632	1.46864	0.171372	8.56991	1.03567e-17	1.76111e-16
TTLL10	370.699	1.45794	0.21454	6.79565	1.07823e-11	9.19677e-11
C1orf87	333.902	1.55938	0.259929	5.99925	1.9823e-09	1.25263e-08
LRRIQ3	43.0807	1.12681	0.181925	6.19381	5.87263e-10	4.00248e-09
LHX8	0.595424	1.69623	0.39653	4.27769	1.88844e-05	6.76271e-05
WDR63	106.289	1.55505	0.243091	6.39699	1.58468e-10	1.15652e-09
GBP4	684.739	-1.31816	0.150541	-8.75612	2.02091e-18	3.68866e-17
BRINP3	46.4488	1.27056	0.171614	7.40358	1.32557e-13	1.44351e-12
VCAM1	333.131	1.19894	0.187286	6.40166	1.53699e-10	1.12391e-09
SLAMF9	43.3729	1.14618	0.230274	4.97747	6.44195e-07	2.8838e-06
LRRC52	6.92382	-1.34508	0.245675	-5.47503	4.37446e-08	2.30447e-07
FAM71A	11.9766	-2.77113	0.412753	-6.71377	1.89655e-11	1.56265e-10
ATF3	2072.25	-1.06389	0.212122	-5.01546	5.29077e-07	2.39898e-06
AXDND1	22.1565	1.31675	0.206862	6.36538	1.94803e-10	1.40793e-09
SPATA17	331.579	1.62125	0.200411	8.08962	5.98519e-16	8.53576e-15
WDR64	7.24541	1.24965	0.184947	6.7568	1.41075e-11	1.18116e-10
KIF26B	63.3648	2.06425	0.143964	14.3387	1.25395e-46	2.85259e-44
KLHDC8A	26.8346	1.20817	0.16214	7.45138	9.23699e-14	1.02503e-12
IL20	10.6364	1.85496	0.327718	5.66022	1.51182e-08	8.42839e-08
IL24	177.473	1.09217	0.143348	7.61906	2.55537e-14	3.04198e-13
FCAMR	3.96248	1.21373	0.30793	3.94157	8.09496e-05	0.000259501
CAPN13	1241.83	1.89228	0.160804	11.7676	5.73375e-32	3.5068e-30
LRRTM1	6.46154	2.41078	0.250242	9.63383	5.75429e-22	1.44859e-20
ZSWIM2	1.16795	1.01225	0.396279	2.55439	0.0106374	0.0226804
ACTG2	7779.73	1.84017	0.176726	10.4125	2.17348e-25	7.38508e-24
CCDC74A	682.832	1.48094	0.182616	8.10959	5.07913e-16	7.27849e-15
TEKT4	108.415	1.20189	0.195895	6.13534	8.49753e-10	5.64505e-09
EN1	1.01042	1.48011	0.410723	3.60368	0.000313745	0.000917767
SPATA18	184.041	1.30808	0.189504	6.90263	5.105e-12	4.56951e-11
PGLYRP4	11.9113	2.57938	0.326755	7.89393	2.92814e-15	3.91553e-14
ALPP	76.8418	-2.15874	0.209008	-10.3285	5.23655e-25	1.70179e-23
DAPL1	80.6655	1.34418	0.22107	6.08034	1.1993e-09	7.80864e-09
CLDN1	75.6563	1.22018	0.231747	5.26511	1.40108e-07	6.89596e-07
COL6A3	6755.3	1.41747	0.120561	11.7573	6.47709e-32	3.92285e-30
FAM19A4	1.00519	-1.83266	0.55	-3.33211	0.00086189	0.00233111
CCKAR	1.24834	2.27017	0.416343	5.45265	4.96236e-08	2.59512e-07
TEX55	1.10277	1.04857	0.378042	2.7737	0.00554231	0.0126668
LMOD1	87.5165	1.04215	0.292032	3.56861	0.000358875	0.00103919
NEK10	341.14	1.54852	0.219578	7.05222	1.76083e-12	1.66819e-11
CCDC141	43.6599	-1.24212	0.172166	-7.2147	5.40515e-13	5.47678e-12
FEV	1.87748	1.03989	0.353287	2.94347	0.00324556	0.00783825
FCRL4	1.63159	2.36594	0.418307	5.65598	1.54956e-08	8.61051e-08
FBLN2	919.635	1.52854	0.1341	11.3985	4.25281e-30	2.22843e-28
NKX6.1	4.66872	1.78022	0.215817	8.24874	1.60073e-16	2.4139e-15
C3orf67	30.719	1.58629	0.155658	10.1908	2.17888e-24	6.70707e-23
PF4	217.892	-1.69309	0.205649	-8.23294	1.82678e-16	2.73052e-15
CFAP100	943.753	1.74277	0.254375	6.8512	7.3234e-12	6.3807e-11
ZDHHC19	151.737	-1.54595	0.151978	-10.1722	2.63783e-24	8.05336e-23
MELTF	126.392	1.083	0.115837	9.34935	8.81853e-21	2.03339e-19
CLDN19	2.60082	1.14976	0.248495	4.62691	3.71169e-06	1.47859e-05
CAMP	300.293	-1.83662	0.193607	-9.48635	2.39256e-21	5.73662e-20
CAMKV	3.0352	1.32837	0.269821	4.92318	8.51508e-07	3.73742e-06
SCRG1	11.2875	1.40449	0.144494	9.72005	2.47654e-22	6.44314e-21
TMEM155	23.8435	1.00267	0.16099	6.22811	4.72098e-10	3.25444e-09
HPGD	1746.37	-1.10497	0.154134	-7.16894	7.55819e-13	7.51949e-12
ASB5	31.5266	2.26532	0.23087	9.8121	9.98681e-23	2.70383e-21
HHIP	499.382	-1.53352	0.172722	-8.87857	6.77227e-19	1.30776e-17
ZNF474	19.1501	1.29183	0.274938	4.69861	2.61941e-06	1.06756e-05
SPINK1	448.48	1.65646	0.25452	6.50817	7.60716e-11	5.792e-10
ESM1	84.7976	-1.6287	0.278721	-5.84348	5.1121e-09	3.05058e-08
CDC20B	82.0644	1.98551	0.254138	7.81274	5.59581e-15	7.21384e-14
ENPP6	3.33329	1.18464	0.294384	4.02413	5.7186e-05	0.000187511
EGFLAM	184.537	1.03363	0.139877	7.38961	1.47262e-13	1.5888e-12
GRIK2	21.7701	1.01917	0.146006	6.98032	2.94503e-12	2.71694e-11
IL22RA2	4.61005	2.82593	0.315335	8.96168	3.1978e-19	6.4004e-18
IL31RA	6.05765	1.05383	0.171187	6.15601	7.46027e-10	5.0077e-09
RAET1E	67.3157	1.5894	0.152065	10.4521	1.43345e-25	4.97018e-24
TBX20	1.26725	-1.02876	0.289891	-3.54878	0.000387022	0.00111515
STEAP1	142.631	1.75262	0.155161	11.2955	1.38077e-29	6.99916e-28
IQUB	24.6737	1.14824	0.193708	5.9277	3.07202e-09	1.89252e-08
HEY1	260.261	-1.32785	0.135473	-9.80159	1.10829e-22	2.98328e-21
SHH	37.3189	-1.20382	0.154674	-7.78291	7.08752e-15	9.03078e-14
COL1A2	22910	1.418	0.137187	10.3363	4.82946e-25	1.58887e-23
FNDC1	76.3231	2.34351	0.206103	11.3706	5.85912e-30	3.036e-28
DLC1	1066.34	-1.14448	0.131113	-8.72894	2.57066e-18	4.63763e-17
C7orf57	112.815	1.49458	0.233302	6.40618	1.49213e-10	1.09368e-09
HNF4G	32.9207	1.83255	0.21236	8.62943	6.16566e-18	1.07893e-16
DEFA4	144.595	-2.97218	0.358016	-8.30182	1.02531e-16	1.57417e-15
OSR2	248.066	1.58556	0.163417	9.70251	2.94172e-22	7.62151e-21
CTHRC1	403.809	2.29602	0.142624	16.0984	2.61767e-58	1.74393e-55
GEM	1008.82	1.00266	0.138506	7.23913	4.51581e-13	4.6183e-12
C9orf24	4060.9	1.75017	0.266745	6.5612	5.33773e-11	4.14232e-10
PRKACG	0.465137	-1.17111	0.393431	-2.97665	0.00291412	0.00710867
NKX6.3	2.66144	1.51566	0.243139	6.23373	4.55469e-10	3.14562e-09
TRPV6	33.2733	1.35894	0.155283	8.75137	2.10784e-18	3.84357e-17
CFAP47	46.0856	1.63706	0.266579	6.14099	8.2008e-10	5.4674e-09
RNF183	33.7467	1.4334	0.185359	7.7331	1.04956e-14	1.30523e-13
PCDH19	16.8436	1.23295	0.178815	6.89515	5.38063e-12	4.79552e-11
PIGA	995.715	-1.11746	0.1202	-9.29672	1.44846e-20	3.2593e-19
VEGFD	71.8666	-1.80768	0.31719	-5.69903	1.20488e-08	6.81705e-08
OR1Q1	1.64467	1.09522	0.397521	2.75513	0.00586685	0.0133366
WNK2	161.376	1.51014	0.170786	8.84234	9.37359e-19	1.78241e-17
NLGN4Y	76.7647	1.56033	0.386127	4.04097	5.3231e-05	0.000175778
ARMC3	438.48	1.70286	0.256294	6.64415	3.04981e-11	2.44904e-10
DEUP1	40.6241	1.49617	0.224457	6.66572	2.63372e-11	2.13143e-10
CLDN2	182.359	2.85985	0.21731	13.1602	1.48667e-39	1.95298e-37
LRRC18	169.73	1.13299	0.181404	6.24565	4.22049e-10	2.92673e-09
TSHR	36.8478	2.32671	0.183672	12.6678	8.92029e-37	9.2444e-35
PKNOX2	72.4334	-1.04399	0.103076	-10.1284	4.13472e-24	1.24201e-22
NGB	1.31262	3.10994	0.392074	7.93203	2.156e-15	2.91646e-14
CDX2	0.779145	1.05188	0.364441	2.88629	0.00389819	0.00924444
AMER2	4.77397	-1.57053	0.211464	-7.42693	1.11149e-13	1.22035e-12
CLEC1B	83.0791	-1.24107	0.141078	-8.7971	1.40397e-18	2.60594e-17
AK8	243.859	1.48111	0.200442	7.38919	1.47723e-13	1.59285e-12
GFI1B	37.7297	-1.11833	0.120718	-9.26398	1.96959e-20	4.38434e-19
DIPK1B	249.035	-1.19988	0.106949	-11.2192	3.28361e-29	1.6334e-27
STOX1	88.7898	1.6514	0.24803	6.65806	2.77468e-11	2.2387e-10
RET	21.8163	1.37334	0.127557	10.7665	4.9566e-27	2.00131e-25
JCAD	614.409	-1.4494	0.174392	-8.31116	9.47716e-17	1.46226e-15
BTNL9	2945.51	-2.49629	0.172994	-14.4299	3.35515e-47	8.12817e-45
AGBL2	478.168	1.56819	0.201154	7.79594	6.39301e-15	8.1906e-14
NELL1	26.7187	1.59463	0.241344	6.60726	3.91497e-11	3.08663e-10
TMCO5A	7.18589	1.8159	0.307333	5.90858	3.45065e-09	2.10837e-08
GLB1L3	65.2729	1.05512	0.103413	10.2029	1.92342e-24	5.96997e-23
PPP1R14D	21.8179	1.07901	0.142001	7.59859	2.99383e-14	3.53238e-13
AVPR1A	73.0399	1.861	0.176542	10.5414	5.56608e-26	2.00443e-24
C16orf78	4.82057	-1.29626	0.224832	-5.76545	8.14414e-09	4.72391e-08
ASPG	144.875	-1.94004	0.174259	-11.1331	8.65798e-29	4.19496e-27
C16orf71	223.131	1.42734	0.193136	7.39031	1.46489e-13	1.58136e-12
TMEM100	1773.46	-2.24948	0.209182	-10.7537	5.6928e-27	2.28865e-25
SYNPO2L	11.9726	-1.27204	0.207447	-6.13187	8.68495e-10	5.7634e-09
NETO1	6.17139	2.18684	0.283721	7.70772	1.28088e-14	1.57505e-13
OR2D2	0.621377	1.3903	0.476502	2.91772	0.00352599	0.00844878
MOGAT2	3.11826	3.14452	0.365737	8.59777	8.12826e-18	1.40523e-16
SERPINB7	20.6378	1.33366	0.350241	3.80783	0.000140191	0.000433471
LMO1	5.27438	1.20897	0.286383	4.22151	2.42674e-05	8.53639e-05
CCDC68	309.531	-1.43272	0.122237	-11.7208	9.97079e-32	5.90461e-30
IQCD	101.253	1.31071	0.19202	6.82592	8.73616e-12	7.54465e-11
CFAP52	676.834	1.61307	0.254672	6.33392	2.39015e-10	1.70893e-09
HTR3A	10.4276	1.56254	0.212404	7.35644	1.88874e-13	2.01099e-12
PLIN1	24.5911	1.3253	0.257337	5.15006	2.60408e-07	1.23322e-06
SCG5	170.993	2.28667	0.180854	12.6437	1.21189e-36	1.20891e-34
GREM1	223.049	3.52741	0.308461	11.4355	2.77891e-30	1.47267e-28
MS4A8	589.446	1.54547	0.293038	5.27397	1.33502e-07	6.60046e-07
CCDC178	107.413	1.485	0.223729	6.63749	3.19067e-11	2.55467e-10
MS4A15	2085.91	-2.60433	0.177063	-14.7085	5.68758e-49	1.68407e-46
MAP1A	25.6846	1.50555	0.308353	4.88256	1.04718e-06	4.54072e-06
TEF	318.478	-1.01314	0.147312	-6.87751	6.09065e-12	5.38204e-11
MEI1	1236.75	1.23274	0.112896	10.9192	9.33086e-28	4.01055e-26
CCDC103	87.3589	1.43246	0.199383	7.18443	6.74875e-13	6.77198e-12
UGT1A6	147.306	3.48893	0.302037	11.5513	7.26886e-31	3.97634e-29
LOXHD1	37.9809	-1.18976	0.145268	-8.19005	2.61113e-16	3.84436e-15
CA4	1067.99	-2.95272	0.219871	-13.4294	4.06891e-41	6.02392e-39
JSRP1	218.36	1.84455	0.142659	12.9298	3.05441e-38	3.58345e-36
FAM129C	99.1588	1.16558	0.148071	7.87175	3.49707e-15	4.61673e-14
CORO6	435.462	-1.06818	0.119051	-8.97243	2.90052e-19	5.85565e-18
AQP2	8.78195	1.55437	0.184947	8.40445	4.29877e-17	6.85964e-16
KIR3DL1	21.8953	-2.07213	0.194743	-10.6403	1.93434e-26	7.3941e-25
DNAAF3	805.795	1.74467	0.241606	7.22112	5.15628e-13	5.23885e-12
PSCA	44.2627	1.38791	0.219045	6.33621	2.35485e-10	1.68433e-09
LY6D	25.1903	4.60695	0.419579	10.9799	4.77276e-28	2.09886e-26
SEMA6B	183.152	1.04605	0.185762	5.63113	1.79034e-08	9.87785e-08
TRPV3	48.393	1.05769	0.123364	8.57375	1.00173e-17	1.71119e-16
GGT6	335.662	1.03207	0.134213	7.68983	1.47328e-14	1.79859e-13
KLK5	38.5797	-1.40237	0.371977	-3.77005	0.000163214	0.000500508
KLK6	7.27071	4.20089	0.345771	12.1494	5.78196e-34	4.38442e-32
KLK13	83.9115	1.9599	0.227856	8.60146	7.87089e-18	1.362e-16
TEKT1	651.83	1.7195	0.250844	6.85488	7.13702e-12	6.22995e-11
RAB26	80.209	1.45814	0.11998	12.1532	5.51868e-34	4.20185e-32
ABCA3	1489.38	-1.09627	0.165365	-6.62937	3.37115e-11	2.68971e-10
VWCE	80.1359	1.65587	0.149437	11.0807	1.55652e-28	7.29532e-27
BATF2	146.52	-1.2083	0.147265	-8.2049	2.30788e-16	3.41947e-15
SLC22A11	6.3906	1.2325	0.166951	7.3824	1.55462e-13	1.67146e-12
SCARA5	445.251	1.13048	0.207323	5.45276	4.95929e-08	2.59424e-07
PNOC	137.08	2.63054	0.179069	14.6901	7.46243e-49	2.17507e-46
GNG4	16.7206	1.53063	0.17436	8.77855	1.65598e-18	3.05545e-17
FAM107A	549.546	-1.77264	0.198637	-8.92401	4.49699e-19	8.85817e-18
MOBP	112.615	1.30614	0.21568	6.0559	1.39637e-09	9.03811e-09
CX3CR1	279.632	-1.24771	0.168432	-7.40783	1.28385e-13	1.40134e-12
PPDPFL	3.23925	1.29681	0.455485	2.8471	0.00441197	0.0103367
XIRP1	48.7655	1.91702	0.324237	5.9124	3.37161e-09	2.06277e-08
DEGS2	229.359	1.32257	0.22888	5.77845	7.53897e-09	4.39201e-08
BDKRB2	381.359	2.10074	0.157264	13.358	1.06325e-40	1.51403e-38
MTNR1A	1.68453	1.90516	0.317471	6.00106	1.96035e-09	1.23961e-08
HR	143.691	1.35027	0.113649	11.8811	1.48442e-32	9.68193e-31
PHYHIP	123.904	1.34309	0.151547	8.8625	7.82374e-19	1.49994e-17
SERINC2	83.108	1.11509	0.140323	7.94654	1.91786e-15	2.60566e-14
MYL1	1.51679	-1.6315	0.36725	-4.44249	8.89255e-06	3.35114e-05
CHRM1	14.5026	-1.72194	0.345089	-4.98983	6.04324e-07	2.7164e-06
COL3A1	21349.5	2.09001	0.174523	11.9755	4.7757e-33	3.27522e-31
DYNLRB2	465.666	1.41986	0.239707	5.92331	3.15522e-09	1.93738e-08
ADAM29	17.3918	-1.33647	0.138779	-9.63017	5.96316e-22	1.49512e-20
MUCL3	153.587	-1.49413	0.191704	-7.79395	6.49453e-15	8.30925e-14
VWA3B	427.831	1.64107	0.25752	6.3726	1.85854e-10	1.34742e-09
IL7R	828.351	-1.03887	0.147917	-7.02333	2.16647e-12	2.03389e-11
LRP1B	4.6741	-1.36162	0.222105	-6.1305	8.76011e-10	5.8112e-09
WFDC12	81.1097	-1.81307	0.150422	-12.0533	1.86419e-33	1.32223e-31
SHOX2	15.5464	1.3154	0.169502	7.76038	8.4677e-15	1.06944e-13
NSG1	211.642	1.18855	0.108482	10.9562	6.20649e-28	2.70504e-26
BTNL3	27.9348	-1.95736	0.329503	-5.94034	2.84426e-09	1.76444e-08
PLA2G4F	1252.67	-1.3898	0.185489	-7.49265	6.74959e-14	7.59849e-13
TRIM49	0.652851	2.3325	0.582237	4.0061	6.17293e-05	0.000201205
STXBP6	925.998	-1.89206	0.139992	-13.5155	1.26743e-41	1.97021e-39
COL4A3	1011.26	-1.35629	0.147283	-9.20875	3.29953e-20	7.23599e-19
ZBBX	801.169	1.86672	0.276562	6.74972	1.48126e-11	1.23575e-10
ROR2	59.3461	1.18083	0.150098	7.86705	3.63088e-15	4.78323e-14
ARMC4	325.141	1.47736	0.216825	6.81358	9.52006e-12	8.18752e-11
PCSK9	371.695	-1.49557	0.158298	-9.44781	3.4598e-21	8.17986e-20
GSG1L	9.11402	-1.26821	0.358826	-3.53432	0.000408825	0.00117218
IL13	42.3	2.13901	0.290687	7.35848	1.8602e-13	1.98287e-12
ADRB2	507.086	-1.29276	0.0917211	-14.0944	4.10862e-45	8.24109e-43
B3GALNT1	338.485	-1.28949	0.108234	-11.9139	1.0014e-32	6.69539e-31
C22orf15	643.74	1.81074	0.241876	7.48625	7.0869e-14	7.96379e-13
RNASE3	55.215	-1.5942	0.222326	-7.17052	7.47156e-13	7.44125e-12
RSPH10B2	175.707	1.60054	0.242002	6.61375	3.74717e-11	2.9631e-10
NPR1	464.561	-1.15378	0.122784	-9.39677	5.6264e-21	1.30866e-19
KCNK9	2.29084	1.04154	0.295387	3.52603	0.000421837	0.00120673
COL22A1	26.282	1.99134	0.149044	13.3607	1.02549e-40	1.47151e-38
SPRR1A	131.511	6.78714	0.493853	13.7433	5.59068e-43	9.39536e-41
SLC38A11	68.5714	1.57503	0.147175	10.7018	9.98236e-27	3.94515e-25
CLIC3	1435.38	-1.46426	0.1318	-11.1097	1.12592e-28	5.35787e-27
BNC1	31.2377	3.06686	0.245448	12.4949	7.95801e-36	7.31274e-34
DRD5	13.7402	2.98424	0.192493	15.5031	3.30785e-54	1.76299e-51
GP9	63.8626	-1.82016	0.179572	-10.1361	3.82055e-24	1.14949e-22
NRG4	206.555	1.04483	0.156432	6.67912	2.4038e-11	1.95639e-10
TAS2R1	0.750452	2.00793	0.608985	3.29718	0.000976618	0.00261038
PCDH7	231.574	1.38805	0.122121	11.3662	6.16386e-30	3.18506e-28
CTNND2	23.8748	-1.54428	0.142637	-10.8267	2.57344e-27	1.06915e-25
PYDC1	4.24876	1.42398	0.621107	2.29265	0.0218681	0.0429986
S100G	6.15356	1.38321	0.473406	2.92183	0.00347977	0.00835199
FRMPD4	3.87268	1.10381	0.209636	5.26535	1.39926e-07	6.88882e-07
TIGD4	26.8638	1.00305	0.165978	6.04327	1.51024e-09	9.72455e-09
MYO7B	330.133	-1.43857	0.128682	-11.1792	5.15324e-29	2.54308e-27
ZPLD1	3.66535	1.62566	0.236137	6.88442	5.80247e-12	5.1469e-11
SERPINA6	3.88856	1.80791	0.420713	4.29724	1.72937e-05	6.22412e-05
GYPA	9.85383	-1.01315	0.202471	-5.00392	5.61747e-07	2.53724e-06
ANKK1	77.9388	1.40516	0.180432	7.78777	6.8204e-15	8.70826e-14
ADRA1B	13.4506	-1.07669	0.280286	-3.84138	0.000122344	0.000382023
FABP6	758.94	1.17228	0.247219	4.74188	2.11748e-06	8.7157e-06
MRAP	60.297	1.44207	0.207472	6.95068	3.63541e-12	3.30805e-11
FAXDC2	524.648	-1.2666	0.102419	-12.3668	3.95151e-35	3.41257e-33
SLN	25.0399	2.97631	0.340127	8.7506	2.12231e-18	3.86616e-17
FRMPD2	193.969	1.91282	0.269068	7.10908	1.16821e-12	1.13915e-11
CST1	62.3643	5.79232	0.463233	12.5041	7.08967e-36	6.54707e-34
AC073611.1	2.22385	1.26275	0.284942	4.43159	9.3542e-06	3.51305e-05
KRT78	3.28044	1.2435	0.319398	3.89327	9.89012e-05	0.000312749
MZB1	5147.57	2.79343	0.184239	15.162	6.31015e-52	2.35419e-49
SLC23A1	96.3247	1.52111	0.248304	6.126	9.01185e-10	5.96547e-09
KRT74	1.47148	1.85237	0.377883	4.90196	9.4887e-07	4.13653e-06
KRT72	7.89638	-1.7602	0.220783	-7.97256	1.55424e-15	2.12869e-14
CDH2	46.8054	2.05867	0.182489	11.2811	1.62748e-29	8.20514e-28
OR10A4	0.463795	1.54858	0.539862	2.86847	0.00412466	0.00972341
DYDC1	47.75	1.47653	0.332123	4.44573	8.75928e-06	3.30538e-05
BFSP2	28.5111	1.84247	0.189535	9.72099	2.4539e-22	6.39702e-21
CEL	64.7181	1.21338	0.111802	10.8529	1.93143e-27	8.09638e-26
PLA2G1B	185.678	-1.30461	0.220247	-5.9234	3.15359e-09	1.93701e-08
CYTL1	30.4274	1.05412	0.41855	2.51851	0.0117853	0.0248314
NCBP2L	14.9284	1.2928	0.184488	7.00751	2.42597e-12	2.26045e-11
DCDC1	75.2838	1.46714	0.230561	6.36332	1.97434e-10	1.42473e-09
HS6ST2	87.5277	2.4911	0.170071	14.6474	1.39979e-48	3.95631e-46
PRKCE	542.243	-1.08447	0.128318	-8.45146	2.87676e-17	4.67448e-16
RLN3	9.34288	-1.16363	0.248268	-4.68699	2.77251e-06	1.12578e-05
SOSTDC1	9.40137	-1.65791	0.197075	-8.41257	4.01129e-17	6.41188e-16
KRT15	3378.6	3.11805	0.219211	14.224	6.50614e-46	1.42783e-43
KCND3	149.851	1.22104	0.095858	12.738	3.63576e-37	3.94311e-35
KRT13	190.553	2.09964	0.21538	9.74854	1.87146e-22	4.9378e-21
PDE7B	91.2031	1.17477	0.117682	9.98251	1.81803e-23	5.19349e-22
NAT1	410.745	1.05885	0.150051	7.05661	1.70616e-12	1.61968e-11
KRT20	5.12962	2.73151	0.456944	5.97779	2.26185e-09	1.4211e-08
CDK5R2	1.21508	1.75148	0.365858	4.78733	1.69012e-06	7.06735e-06
DLK2	79.8924	1.10618	0.134387	8.23125	1.85265e-16	2.76475e-15
RXFP1	64.9995	-1.98874	0.158144	-12.5755	2.87836e-36	2.73944e-34
ECEL1	19.7533	2.86391	0.342956	8.35066	6.78836e-17	1.06322e-15
DNAI2	385.608	1.87276	0.255896	7.31844	2.50875e-13	2.64098e-12
PTCRA	141.45	-1.25884	0.143632	-8.76436	1.87833e-18	3.43514e-17
LKAAEAR1	52.6132	2.09437	0.283602	7.38489	1.52584e-13	1.64147e-12
DEFB4A	532.901	2.12467	0.37634	5.64562	1.64588e-08	9.12669e-08
VAT1L	3.23722	1.52882	0.45837	3.33533	0.000851987	0.00230567
LRRC34	310.985	1.00925	0.14298	7.0587	1.68072e-12	1.5996e-11
SLFNL1	81.1193	-1.31263	0.131188	-10.0057	1.43881e-23	4.16763e-22
WDR87	0.956374	2.05373	0.345295	5.94776	2.7183e-09	1.69136e-08
CFAP46	298.031	1.67314	0.249236	6.71309	1.90543e-11	1.56926e-10
ADRA1D	65.0715	-1.08958	0.1372	-7.94156	1.99655e-15	2.7106e-14
FRMD5	15.1489	1.32972	0.164932	8.06227	7.48882e-16	1.06072e-14
FBXW10	33.7592	1.14005	0.188662	6.0428	1.51459e-09	9.74919e-09
DRC3	982.228	1.23336	0.178154	6.923	4.42168e-12	3.98079e-11
GAP43	26.2333	2.70388	0.177583	15.226	2.37799e-52	9.4381e-50
CALB2	31.5457	1.10491	0.278163	3.97216	7.12246e-05	0.000229786
CCL11	431.516	1.01122	0.221085	4.5739	4.7872e-06	1.8808e-05
STARD5	266.285	1.2869	0.097356	13.2185	6.86141e-40	9.34253e-38
SYNPO2	362.976	1.26453	0.12057	10.488	9.81053e-26	3.47259e-24
RSPH9	58.1845	1.5915	0.209843	7.58421	3.3451e-14	3.93192e-13
RAB40A	84.759	-1.10559	0.0928566	-11.9064	1.09542e-32	7.29787e-31
MUCL1	22.6144	2.23971	0.420802	5.32247	1.02366e-07	5.14144e-07
RND1	263.797	-1.40973	0.200989	-7.014	2.31605e-12	2.16559e-11
CCL19	14.0731	1.12648	0.378511	2.97608	0.00291962	0.00711929
HOXC5	8.40748	1.61283	0.258938	6.22864	4.70508e-10	3.24468e-09
EGFL7	11511.7	-1.00959	0.100311	-10.0647	7.914e-24	2.32485e-22
NBEA	205.451	1.04715	0.116834	8.9627	3.16823e-19	6.34802e-18
MRGPRF	38.6255	1.36899	0.245642	5.57312	2.50218e-08	1.35764e-07
HPSE2	278.672	2.13049	0.150946	14.1143	3.10037e-45	6.42603e-43
CCDC96	253.673	1.32163	0.172781	7.64914	2.02325e-14	2.43025e-13
LRRN3	243.216	-1.7495	0.132931	-13.161	1.47159e-39	1.94688e-37
SYT12	29.155	2.63195	0.159377	16.514	2.91031e-61	2.71445e-58
C11orf86	0.856749	2.36048	0.413419	5.70964	1.13217e-08	6.42514e-08
OLR1	1077.46	-1.04183	0.194333	-5.36106	8.27365e-08	4.20421e-07
RNASE8	2.18485	-1.23482	0.498435	-2.4774	0.0132344	0.0275468
C2orf70	23.5298	1.24771	0.200005	6.2384	4.4208e-10	3.05654e-09
PC	31.7427	1.08071	0.186138	5.80594	6.4007e-09	3.76059e-08
UGT2A1	15.1634	1.07739	0.29872	3.60668	0.000310141	0.000908077
APOBEC4	52.8768	1.88761	0.333858	5.65391	1.56836e-08	8.71238e-08
MUC13	49.4093	2.67466	0.271644	9.84622	7.11705e-23	1.95525e-21
X43534	292.199	1.43624	0.241416	5.94925	2.69373e-09	1.67807e-08
SPTBN2	318.091	1.49834	0.10877	13.7753	3.58863e-43	6.1415e-41
PIFO	1394.04	1.57032	0.215049	7.30215	2.83198e-13	2.96452e-12
TCAP	141.803	-1.10199	0.118573	-9.29377	1.48913e-20	3.34678e-19
SPERT	1.00875	1.16877	0.379766	3.07759	0.00208682	0.00523994
TLR10	70.6641	1.17513	0.17264	6.80684	9.97636e-12	8.56021e-11
GSTA3	55.7144	1.16142	0.32834	3.53725	0.000404312	0.00116036
SNX31	11.5177	1.49071	0.253712	5.8756	4.21325e-09	2.53611e-08
GLIS1	15.5082	1.6672	0.146791	11.3576	6.79566e-30	3.50183e-28
CHRNA9	3.6371	1.32583	0.583342	2.27283	0.0230366	0.0450304
VWC2L	1.66253	1.19509	0.297485	4.0173	5.88683e-05	0.000192283
LINGO2	3.61991	-1.05738	0.195327	-5.41341	6.18367e-08	3.19353e-07
WDR49	236.919	1.37842	0.193159	7.13617	9.59642e-13	9.42663e-12
ADGRE1	137.128	-1.28385	0.159536	-8.04741	8.45652e-16	1.19055e-14
DNAH12	716.703	1.79893	0.247198	7.27729	3.40581e-13	3.54136e-12
CATSPERD	629.254	1.56884	0.298463	5.25639	1.46909e-07	7.21739e-07
ASPHD1	112.543	1.34436	0.146331	9.18717	4.0333e-20	8.77914e-19
P2RY14	94.6498	-1.01625	0.141709	-7.17135	7.42606e-13	7.4025e-12
CD164L2	424.84	1.84879	0.221204	8.35783	6.38815e-17	1.00476e-15
FUT1	430.558	-1.28426	0.0957788	-13.4086	5.38616e-41	7.78864e-39
TEX36	3.64591	1.11092	0.363961	3.0523	0.00227093	0.00565613
DES	12088.7	1.68876	0.164541	10.2634	1.03013e-24	3.26805e-23
WFDC5	12.5471	-1.22801	0.263136	-4.66683	3.05875e-06	1.23518e-05
CADM2	14.8075	-1.36299	0.179956	-7.57399	3.61941e-14	4.22771e-13
VWA3A	457.887	1.25878	0.215583	5.83893	5.25361e-09	3.12403e-08
LPL	160.445	-1.24239	0.186701	-6.65445	2.84352e-11	2.2893e-10
DPP10	23.3856	1.00175	0.133372	7.51097	5.86896e-14	6.67559e-13
SUGCT	186.73	2.07472	0.114817	18.0698	5.5148e-73	2.26553e-69
TEX26	15.5447	2.20858	0.321368	6.87242	6.31237e-12	5.56216e-11
TMEM270	18.3148	2.08932	0.415634	5.02682	4.9868e-07	2.27331e-06
HOXD8	70.1347	1.12098	0.148892	7.52884	5.11929e-14	5.88024e-13
LRRN1	169.324	1.50571	0.115803	13.0023	1.1868e-38	1.47591e-36
ASCL3	8.90616	1.10077	0.27671	3.97805	6.94821e-05	0.000224826
C11orf16	606.059	1.59833	0.264422	6.04462	1.49764e-09	9.65677e-09
TMPRSS7	9.87415	1.039	0.176464	5.88792	3.91076e-09	2.36624e-08
MC5R	3.38881	1.37219	0.203164	6.75411	1.43715e-11	1.20056e-10
GPX2	63.0787	1.10455	0.133039	8.30247	1.01966e-16	1.56679e-15
ENTHD1	5.87232	1.37082	0.178824	7.66577	1.77765e-14	2.14768e-13
CIDEA	4.65898	1.33498	0.340085	3.92544	8.65707e-05	0.000276522
ACBD7	3.51525	1.96376	0.655352	2.9965	0.00273099	0.00669874
FOXR1	1.0144	-1.03637	0.448931	-2.30854	0.0209693	0.0414147
PRR18	4.95963	1.65688	0.466033	3.55528	0.000377583	0.00109032
CLEC14A	2960.64	-1.0029	0.101542	-9.87673	5.25166e-23	1.46216e-21
PRR15	141.201	1.44938	0.21132	6.85868	6.94974e-12	6.08355e-11
MAP3K19	274.745	1.64487	0.26293	6.25592	3.95169e-10	2.74953e-09
TCERG1L	4.20693	1.7727	0.210719	8.41261	4.00979e-17	6.41188e-16
NCKAP5	143.616	-1.7242	0.148507	-11.6103	3.65482e-31	2.05973e-29
VSIG10	461.071	-1.01358	0.0779985	-12.9949	1.3084e-38	1.60572e-36
GRIN1	14.8057	1.08346	0.186477	5.81014	6.2422e-09	3.67673e-08
FUT2	191.642	1.86668	0.154271	12.0999	1.05686e-33	7.70103e-32
MUC20	946.688	1.07543	0.111513	9.64398	5.2129e-22	1.32122e-20
LY6H	104.512	1.18423	0.205709	5.75683	8.57104e-09	4.94998e-08
FIBIN	1563.1	-1.56355	0.13526	-11.5596	6.60212e-31	3.63292e-29
FBXO39	23.7142	1.41787	0.147333	9.62355	6.35947e-22	1.59234e-20
CASKIN2	274.471	-1.7006	0.14482	-11.7429	7.68311e-32	4.59515e-30
NIM1K	116.976	-1.203	0.096015	-12.5293	5.16079e-36	4.86209e-34
CD19	54.0476	2.08076	0.193165	10.7719	4.67124e-27	1.89018e-25
ERICH5	21.6548	1.45306	0.412519	3.52241	0.000427645	0.0012222
JUN	6566.04	-1.06739	0.132923	-8.03011	9.73843e-16	1.35872e-14
TEX44	3.28672	1.38885	0.289007	4.80559	1.54295e-06	6.48979e-06
SRRM3	70.7952	1.47909	0.11696	12.6462	1.17478e-36	1.18455e-34
CCDC184	67.5264	1.09431	0.134151	8.15733	3.42504e-16	5.00318e-15
C2orf73	153.787	1.57864	0.225196	7.01005	2.38228e-12	2.22195e-11
ADAMTSL1	131.53	1.05515	0.137345	7.68248	1.5604e-14	1.89998e-13
HTR3C	103.214	-2.79313	0.243925	-11.4508	2.33054e-30	1.24925e-28
PPP1R42	391.423	1.64005	0.253562	6.46806	9.92696e-11	7.45481e-10
SH2D4B	16.3895	-1.19968	0.141374	-8.48588	2.14099e-17	3.53121e-16
KCNG2	16.2265	1.35344	0.161711	8.36948	5.78754e-17	9.12602e-16
OR2D3	0.38312	1.7289	0.522288	3.31025	0.00093214	0.00250538
CALML3	6.73127	4.0174	0.383404	10.4783	1.08736e-25	3.82709e-24
CALML5	2.35261	1.94433	0.507464	3.83146	0.000127383	0.000396694
CCDC185	0.72653	1.74876	0.289439	6.04189	1.52316e-09	9.79757e-09
DNAJC22	27.3459	2.27544	0.234076	9.72093	2.45538e-22	6.39702e-21
TUBAL3	2.34613	1.12423	0.384649	2.92273	0.00346978	0.00833123
AMBN	0.480972	1.24338	0.392274	3.16967	0.00152613	0.00392938
ZHX2	2.36209	1.27027	0.526072	2.41464	0.0157509	0.0321504
CPNE7	240.047	1.21531	0.155396	7.82077	5.24998e-15	6.79148e-14
C5orf46	85.032	1.05354	0.243926	4.31909	1.5667e-05	5.67923e-05
RIIAD1	485.272	1.43463	0.22682	6.32497	2.53276e-10	1.80535e-09
TMEM139	795.489	-1.18786	0.113813	-10.4369	1.68155e-25	5.77673e-24
RFLNA	77.8813	1.022	0.183968	5.55527	2.77176e-08	1.49694e-07
FOXE1	7.96094	2.53843	0.329326	7.70794	1.27867e-14	1.57337e-13
LGALS7B	551.774	4.18701	0.294907	14.1977	9.46546e-46	2.04436e-43
ERICH3	197.761	1.66754	0.271454	6.14301	8.09703e-10	5.40207e-09
KLHDC7A	87.8012	1.04534	0.138246	7.56141	3.98715e-14	4.62827e-13
EXOC3L1	281.833	-1.18367	0.099464	-11.9005	1.17642e-32	7.7544e-31
C12orf42	13.4801	1.40212	0.20602	6.80576	1.00521e-11	8.61723e-11
HES7	13.2778	-1.11466	0.191416	-5.82322	5.77253e-09	3.41627e-08
PCARE	3.62264	-1.70801	0.481064	-3.55049	0.000384518	0.00110845
RTL3	17.1407	1.14352	0.163957	6.97452	3.0691e-12	2.82024e-11
GATA2	1724.91	-1.00435	0.111481	-9.00914	2.07674e-19	4.26177e-18
FJX1	249.243	1.37068	0.131676	10.4095	2.2431e-25	7.56651e-24
HTR1D	9.09388	-1.30554	0.141816	-9.20593	3.38712e-20	7.39851e-19
GRM8	25.516	-2.69238	0.211793	-12.7123	5.05214e-37	5.44755e-35
TPPP2	10.855	-1.18723	0.183586	-6.4669	1.00031e-10	7.509e-10
ARL14	7.86705	1.63276	0.219303	7.44524	9.677e-14	1.06877e-12
CDH5	570.347	-1.27547	0.103935	-12.2718	1.28438e-34	1.04169e-32
LRRC3B	7.0351	-1.17703	0.228387	-5.15366	2.55457e-07	1.21039e-06
FAM216B	166.442	1.6363	0.318296	5.14081	2.73552e-07	1.29121e-06
ABCA13	169.177	1.73535	0.257057	6.75085	1.46978e-11	1.22728e-10
C1orf194	3118	1.78262	0.28288	6.30168	2.94445e-10	2.07609e-09
B3GNT3	156.718	2.90947	0.194265	14.9768	1.04141e-50	3.40816e-48
ITLN1	22.1493	1.27984	0.390827	3.27469	0.00105777	0.00280478
GPBAR1	35.792	-1.00252	0.105199	-9.52979	1.57601e-21	3.83298e-20
ZNF648	1.16321	2.0014	0.364734	5.48729	4.08143e-08	2.15741e-07
CCR8	31.459	1.72399	0.200906	8.5811	9.39702e-18	1.61114e-16
SSC5D	139.508	1.42592	0.128426	11.1031	1.21231e-28	5.72301e-27
FAM71E2	0.506408	1.39175	0.556663	2.50017	0.0124134	0.0260005
ITPRID1	15.4406	1.45028	0.150432	9.64079	5.37718e-22	1.35916e-20
DEFB124	246.537	2.12722	0.198002	10.7434	6.36345e-27	2.54184e-25
ZSCAN4	24.0827	1.36256	0.13468	10.117	4.644e-24	1.38607e-22
BHLHA15	116.102	1.93353	0.162752	11.8802	1.49996e-32	9.7492e-31
RNF182	91.9085	-1.67496	0.116209	-14.4133	4.26931e-47	1.0081e-44
PRF1	892.687	-1.20204	0.124036	-9.69104	3.29149e-22	8.44559e-21
S1PR5	112.172	-1.43399	0.143448	-9.99653	1.57839e-23	4.55777e-22
OR51E1	1.20225	2.34339	0.419594	5.5849	2.33832e-08	1.27132e-07
MAP3K15	19.3307	-2.53067	0.14293	-17.7057	3.79209e-70	8.84222e-67
BHLHE22	101.234	1.44883	0.132748	10.9141	9.86738e-28	4.2314e-26
SSR4	24257.1	1.02751	0.0791052	12.9891	1.41047e-38	1.71966e-36
OXTR	84.1036	1.45025	0.194643	7.45084	9.27502e-14	1.02863e-12
CHRM2	39.6661	-1.93347	0.216175	-8.94399	3.75353e-19	7.46412e-18
MAPK15	2515.53	1.22334	0.202942	6.02803	1.6597e-09	1.06209e-08
MUC16	431.989	2.6673	0.319473	8.34907	6.88027e-17	1.07581e-15
TMEM132C	80.2254	1.10223	0.14947	7.37422	1.65306e-13	1.77424e-12
TMEM132E	14.494	1.80399	0.159364	11.32	1.04526e-29	5.32742e-28
NME9	177.44	1.51508	0.206057	7.35272	1.94215e-13	2.0655e-12
CCL13	49.2815	1.18083	0.314941	3.74938	0.00017727	0.000540415
CFAP65	377.987	1.62533	0.258079	6.29782	3.01867e-10	2.12411e-09
UTS2R	4.65457	1.50339	0.227701	6.60245	4.04404e-11	3.18302e-10
AATK	685.033	-1.49272	0.110745	-13.4788	2.08359e-41	3.13445e-39
TMEM45A	1796.46	1.74457	0.114798	15.1968	3.71327e-52	1.44307e-49
C6orf223	99.1355	-1.21045	0.166503	-7.26987	3.59831e-13	3.72905e-12
TMIE	59.3737	-1.29221	0.106566	-12.1259	7.69717e-34	5.74332e-32
FDCSP	445.981	4.40971	0.383215	11.5072	1.21425e-30	6.62298e-29
PLAG1	10.0283	-1.2596	0.178529	-7.05545	1.72043e-12	1.6324e-11
ODF3L2	23.4399	-1.04076	0.121433	-8.57068	1.02873e-17	1.7509e-16
SLC2A4	102.508	1.10296	0.141035	7.82046	5.2632e-15	6.80387e-14
IBA57	112.414	-1.44286	0.130862	-11.0257	2.87149e-28	1.29383e-26
OR4C6	1.1205	2.56422	0.472944	5.42182	5.89942e-08	3.05264e-07
OR52K2	0.890105	-1.39042	0.387461	-3.58853	0.000332548	0.00096776
RTKN2	534.851	-2.81017	0.200934	-13.9855	1.91073e-44	3.56427e-42
KCNIP1	60.7135	-1.05021	0.139828	-7.5107	5.88104e-14	6.68525e-13
RGMA	270.18	1.18265	0.130857	9.0377	1.60006e-19	3.32009e-18
ZAR1	2.62682	-1.86259	0.265963	-7.00318	2.50216e-12	2.32794e-11
BACE2	1583.64	1.25418	0.0813208	15.4226	1.15318e-53	5.51575e-51
GABRG3	3.14685	1.93334	0.300149	6.44126	1.18486e-10	8.83739e-10
IZUMO1	175.076	-1.73413	0.163778	-10.5882	3.37861e-26	1.25797e-24
B4GALNT4	37.0107	1.08789	0.196615	5.53311	3.14599e-08	1.68491e-07
KIAA2012	143.235	1.95392	0.235959	8.28077	1.22386e-16	1.86214e-15
LIPF	2.06007	2.45184	0.382466	6.41061	1.44936e-10	1.06611e-09
OR5P3	1.70967	-1.87041	0.327274	-5.71513	1.09619e-08	6.23617e-08
TSHZ2	126.143	1.43155	0.129226	11.0779	1.60684e-28	7.4935e-27
CAV3	41.7284	-1.74575	0.16152	-10.8082	3.14751e-27	1.29611e-25
CLEC4G	101.631	1.47252	0.193465	7.61131	2.7134e-14	3.21778e-13
RXFP3	0.726105	1.50079	0.321885	4.66252	3.12367e-06	1.25797e-05
PAPPA	6.41078	1.21298	0.285241	4.25247	2.11424e-05	7.51076e-05
KRTAP13.2	2.22793	2.0264	0.563395	3.59677	0.000322187	0.000940544
GALNT9	27.7218	1.23093	0.194946	6.3142	2.71563e-10	1.92614e-09
TMEM95	3.4042	1.764	0.261586	6.7435	1.54614e-11	1.28585e-10
WFDC10B	41.3225	-1.3028	0.157042	-8.29588	1.07787e-16	1.65078e-15
PCP4	6.35992	2.033	0.455202	4.46616	7.96374e-06	3.02681e-05
RIPPLY3	17.4179	-1.16495	0.154609	-7.5348	4.89071e-14	5.63156e-13
CCDC60	89.0995	1.8253	0.218829	8.34122	7.35265e-17	1.14679e-15
CCBE1	133.237	-1.06725	0.139297	-7.66169	1.83504e-14	2.21129e-13
OR5P2	2.67542	-1.43441	0.282917	-5.07005	3.97704e-07	1.83769e-06
EPHA10	25.2588	1.96313	0.192132	10.2176	1.65358e-24	5.14956e-23
CABCOCO1	478.261	1.24948	0.197464	6.32763	2.48957e-10	1.77728e-09
GBP6	51.0283	1.60463	0.200412	8.00663	1.17892e-15	1.63142e-14
OVCH2	137.899	-1.39907	0.160311	-8.72722	2.61018e-18	4.70438e-17
GRIN2A	15.9935	1.31053	0.192616	6.80389	1.01833e-11	8.72177e-11
IZUMO1R	3.73881	1.62677	0.339463	4.79218	1.64976e-06	6.91252e-06
C11orf88	1714.33	1.47363	0.274043	5.37735	7.55891e-08	3.85678e-07
EFHC2	46.4414	1.50227	0.212157	7.08096	1.43164e-12	1.37659e-11
MRGPRX2	3.98397	-1.11417	0.320816	-3.47293	0.000514817	0.00145108
OPCML	6.00914	1.03395	0.235793	4.38498	1.15994e-05	4.28721e-05
NPBWR1	1.5376	1.1285	0.30886	3.65376	0.000258424	0.00076579
KCTD16	15.3921	-1.26564	0.145325	-8.709	3.06559e-18	5.49861e-17
B3GALT5	8.17086	1.50014	0.217012	6.91272	4.75439e-12	4.26182e-11
ELOA3	1.8037	1.04232	0.444574	2.34453	0.0190513	0.0380699
ANKRD45	180.124	1.43099	0.190626	7.5068	6.05922e-14	6.87104e-13
DNAH2	212.59	1.6368	0.21665	7.55506	4.18669e-14	4.83582e-13
KCNH8	3.76263	1.6028	0.219285	7.30922	2.68698e-13	2.82383e-12
NPW	10.35	1.28479	0.245513	5.23308	1.66711e-07	8.11542e-07
TRIML1	1.64199	-2.23438	0.322735	-6.92326	4.4138e-12	3.97562e-11
CLDN5	7349.54	-1.16871	0.125628	-9.30297	1.36575e-20	3.08063e-19
PCDH9	42.5748	-1.23265	0.146393	-8.42017	3.75946e-17	6.02483e-16
ALDH1A3	847.41	2.14243	0.151439	14.1471	1.9465e-45	4.12615e-43
LRRC19	8.71117	-1.09328	0.158793	-6.88493	5.78159e-12	5.13082e-11
C1QTNF8	16.9279	1.85493	0.316963	5.85221	4.8508e-09	2.89929e-08
POU3F2	1.04463	1.5026	0.289101	5.19747	2.02014e-07	9.72986e-07
DHRS7C	0.975529	1.24999	0.54421	2.2969	0.0216247	0.0425783
DUSP8	191.308	-1.08248	0.141606	-7.64435	2.09998e-14	2.51593e-13
FAM19A3	2.92971	1.44491	0.253594	5.69772	1.21418e-08	6.86552e-08
C14orf180	49.8094	1.06357	0.203956	5.2147	1.8411e-07	8.91355e-07
KCNH7	4.52205	-1.01716	0.177025	-5.74587	9.14473e-09	5.25364e-08
NELL2	405.039	1.1918	0.173118	6.88433	5.80615e-12	5.14772e-11
LRRC26	17.0969	2.37957	0.30823	7.72012	1.16223e-14	1.43578e-13
OR6A2	0.853955	1.65167	0.311221	5.30707	1.11401e-07	5.56976e-07
WT1	34.2489	2.93956	0.351836	8.3549	6.54859e-17	1.02826e-15
FAM227A	98.6598	1.42293	0.184037	7.73177	1.06065e-14	1.31727e-13
IFNE	10.2725	3.06808	0.239191	12.8269	1.1586e-37	1.29416e-35
MROH2A	10.4089	1.04646	0.273442	3.827	0.000129717	0.000403491
EFCAB10	293.883	1.47033	0.189628	7.75376	8.92141e-15	1.1237e-13
NPY2R	0.855263	1.69052	0.411469	4.1085	3.98239e-05	0.000134238
MIXL1	21.8234	1.97677	0.166036	11.9057	1.10581e-32	7.34083e-31
PRSS57	15.6903	-1.73453	0.168914	-10.2688	9.74433e-25	3.0966e-23
PPIL6	588.547	1.00964	0.167282	6.03552	1.58456e-09	1.01687e-08
HS6ST3	6.54203	1.40469	0.208476	6.73791	1.60677e-11	1.3339e-10
KPNA7	39.2461	1.00845	0.157142	6.41747	1.3856e-10	1.02445e-09
DLK1	1.98979	1.36603	0.514356	2.6558	0.00791202	0.0174437
AHNAK2	379.502	1.13632	0.13387	8.48819	2.09887e-17	3.46481e-16
OLFML2A	249.589	-1.32824	0.122017	-10.8857	1.349e-27	5.71913e-26
DBX2	0.88394	1.20814	0.44999	2.68482	0.00725697	0.0161503
SYN3	73.8975	-1.00907	0.0965028	-10.4564	1.36931e-25	4.75663e-24
MORN5	528.812	1.7703	0.270911	6.53462	6.37722e-11	4.89751e-10
PRAME	1.76095	1.25217	0.295686	4.23481	2.28745e-05	8.07379e-05
NRG3	30.546	-1.8143	0.174516	-10.3962	2.58078e-25	8.67421e-24
CLDN24	5.56993	-1.25761	0.178131	-7.06007	1.66424e-12	1.58523e-11
NAT8L	6.31816	1.12742	0.155097	7.26915	3.61758e-13	3.74486e-12
CCDC190	266.143	1.79911	0.273991	6.56633	5.15699e-11	4.01496e-10
NKAIN3	1.29046	1.63068	0.337892	4.82603	1.3928e-06	5.93315e-06
LEMD1	56.4462	1.32729	0.182975	7.25395	4.04793e-13	4.16492e-12
KRT73	6.17822	-1.89486	0.221752	-8.54494	1.28599e-17	2.16507e-16
KRT5	514.203	3.17208	0.304586	10.4144	2.13169e-25	7.25632e-24
HTR3D	0.62659	1.16536	0.468277	2.48861	0.0128244	0.0267651
AGBL4	23.9815	1.00186	0.226561	4.42202	9.77845e-06	3.65912e-05
BPIFB4	3.23554	1.8965	0.355292	5.33785	9.40576e-08	4.74973e-07
GABRA5	0.758555	2.36927	0.550003	4.30774	1.64934e-05	5.96024e-05
RGS9BP	12.3938	-2.2451	0.14961	-15.0064	6.67055e-51	2.26241e-48
TMEM212	368.865	1.20434	0.18091	6.6571	2.79276e-11	2.25134e-10
THBS2	1417.34	1.87161	0.158513	11.8073	3.57908e-32	2.24041e-30
TRDN	9.3957	1.43787	0.340049	4.22841	2.35352e-05	8.29287e-05
AKAP14	582.887	1.75979	0.28349	6.20761	5.37957e-10	3.68394e-09
KLK12	127.938	1.90913	0.294224	6.48868	8.65891e-11	6.53676e-10
C5orf38	421.452	-1.00742	0.107896	-9.33693	9.91695e-21	2.27541e-19
KIF24	59.1788	1.29016	0.155915	8.27476	1.2871e-16	1.952e-15
CYP27C1	27.2924	2.27848	0.140187	16.2531	2.12227e-59	1.58355e-56
CFAP73	1013.99	1.6634	0.251723	6.60807	3.89371e-11	3.07118e-10
FOXI2	19.5857	1.73428	0.165696	10.4666	1.22947e-25	4.30291e-24
KRT16	44.0974	1.02486	0.294975	3.47439	0.00051201	0.00144363
KRT14	37.4374	3.54884	0.281685	12.5986	2.14915e-36	2.07722e-34
QRFPR	4.6457	-1.31585	0.400938	-3.28193	0.00103098	0.00273959
TNFRSF18	224.94	1.14227	0.128869	8.86384	7.73072e-19	1.48669e-17
TMEM232	181.91	1.02564	0.170266	6.02375	1.70427e-09	1.08875e-08
FAM183A	2654.29	1.67014	0.265354	6.29402	3.09351e-10	2.1735e-09
EFCAB6	137.364	1.07986	0.165961	6.50675	7.67925e-11	5.83974e-10
KANK3	1447.15	-1.17659	0.08601	-13.6797	1.34239e-42	2.21601e-40
ESPN	273.037	1.89934	0.21407	8.87252	7.1507e-19	1.37657e-17
TMPRSS11A	0.833662	1.50757	0.365477	4.12494	3.70827e-05	0.000125851
CCK	72.8052	-2.81432	0.225429	-12.4843	9.09193e-36	8.27321e-34
MAGED4B	313.649	1.40278	0.113194	12.3926	2.86459e-35	2.50874e-33
NPSR1	1.01378	1.58847	0.353859	4.48898	7.15634e-06	2.73779e-05
WDR86	254.929	1.00469	0.118931	8.44768	2.9716e-17	4.81601e-16
CIDEC	14.655	2.54916	0.273084	9.33469	1.0129e-20	2.31553e-19
LUZP2	25.5194	1.11267	0.209347	5.31498	1.06671e-07	5.34331e-07
CDHR4	525.738	1.91071	0.266051	7.18175	6.88264e-13	6.90262e-12
C12orf74	61.2978	1.74145	0.229233	7.59687	3.03377e-14	3.57724e-13
SBK2	1.43397	1.51206	0.443233	3.41143	0.000646231	0.00179041
PLEKHN1	91.015	1.19399	0.101687	11.7419	7.77642e-32	4.63454e-30
MYMK	6.59679	-1.22144	0.303457	-4.02508	5.69553e-05	0.00018682
C17orf97	46.468	1.13591	0.223869	5.07398	3.89584e-07	1.80176e-06
SAMD11	501.722	1.6608	0.13639	12.1768	4.13049e-34	3.18389e-32
AMTN	20.1668	1.32994	0.435095	3.05666	0.00223819	0.0055832
DNAJB13	465.718	1.61972	0.217488	7.44737	9.52164e-14	1.0541e-12
DIPK1C	2.53331	1.93444	0.218348	8.85942	8.04352e-19	1.53891e-17
HELT	12.0632	-2.97554	0.27095	-10.9819	4.67099e-28	2.05987e-26
LRRC74B	320.112	1.61504	0.254821	6.33796	2.32823e-10	1.66785e-09
CLEC17A	31.417	1.4175	0.174493	8.12352	4.52846e-16	6.52812e-15
LCN10	382.502	1.56375	0.176423	8.86364	7.74414e-19	1.48774e-17
C2orf66	27.3097	1.19206	0.201739	5.90893	3.4433e-09	2.10457e-08
COL14A1	2624.85	2.39015	0.14668	16.2951	1.07009e-59	8.31725e-57
MORN2	177.604	1.25095	0.162678	7.6897	1.47478e-14	1.79925e-13
S100A3	172.294	-1.23259	0.135827	-9.07464	1.14053e-19	2.3905e-18
NWD1	160.308	1.64741	0.258294	6.37804	1.79373e-10	1.30246e-09
MESP2	9.77225	1.60651	0.206427	7.78244	7.114e-15	9.05834e-14
HEPACAM2	10.5542	1.00223	0.231469	4.32987	1.49197e-05	5.43152e-05
PLA2G2A	4129.13	2.64597	0.274721	9.63148	5.88778e-22	1.47821e-20
IL17REL	6.61743	1.96603	0.203996	9.63761	5.5462e-22	1.39809e-20
OR6N2	0.577928	-1.37571	0.416555	-3.30258	0.000957991	0.00256721
TCTEX1D4	308.218	1.4255	0.202682	7.03318	2.01885e-12	1.902e-11
INSC	68.4053	-1.45942	0.159473	-9.15157	5.61123e-20	1.20868e-18
SERPINA5	62.0491	1.6759	0.18371	9.12254	7.3383e-20	1.56266e-18
COL25A1	38.2698	1.46174	0.178555	8.18653	2.6887e-16	3.95544e-15
CFAP77	300.161	1.82704	0.268177	6.81283	9.5694e-12	8.22615e-11
HBA2	362.795	-1.6453	0.259179	-6.3481	2.17988e-10	1.56699e-09
NKAIN2	9.47794	1.55563	0.208043	7.47744	7.57851e-14	8.49066e-13
CLEC20A	1.81401	1.24099	0.213882	5.80223	6.54394e-09	3.83991e-08
SAXO2	1241.61	1.43085	0.212921	6.72011	1.81592e-11	1.50152e-10
DUPD1	2.27099	1.93007	0.461098	4.18581	2.84155e-05	9.86898e-05
OSTN	25.3478	1.20988	0.222152	5.44615	5.14712e-08	2.68496e-07
BCL2L15	106.149	1.00829	0.125717	8.02037	1.05424e-15	1.46759e-14
SPRED3	77.0969	1.01889	0.153495	6.63792	3.18151e-11	2.54931e-10
SHISA6	13.5225	1.12208	0.176088	6.37226	1.8626e-10	1.34932e-09
SNTN	2061.25	1.78701	0.271119	6.59124	4.36162e-11	3.42431e-10
ENTPD8	16.8173	1.28834	0.173483	7.42633	1.11654e-13	1.22445e-12
KLRG2	80.0378	-2.4721	0.142704	-17.3233	3.13938e-67	5.32382e-64
GJB3	70.6836	1.82575	0.17367	10.5128	7.54515e-26	2.69631e-24
INSYN2	2.20593	1.18811	0.485939	2.44498	0.0144862	0.0298032
CFAP126	1345.91	1.79205	0.273867	6.5435	6.00952e-11	4.6323e-10
SBSN	3.32867	1.49356	0.365851	4.08243	4.4568e-05	0.000148991
IL1RAPL2	1.13264	1.49979	0.450569	3.32865	0.000872683	0.00235655
SP6	103.155	-1.90969	0.202202	-9.44443	3.57338e-21	8.43769e-20
ANKRD34B	2.74158	-1.39004	0.596678	-2.32964	0.0198254	0.0394427
GJB5	92.0815	2.66031	0.214315	12.4131	2.21892e-35	1.96169e-33
TOGARAM2	866.299	1.30872	0.191617	6.82987	8.49924e-12	7.35242e-11
ALG1L	104.542	1.03281	0.213872	4.82911	1.37142e-06	5.84875e-06
KIAA0408	244.798	-1.50747	0.11892	-12.6764	7.99541e-37	8.47422e-35
NCR1	63.8522	-1.73863	0.144806	-12.0066	3.27915e-33	2.28243e-31
PTPRT	96.015	1.82572	0.245804	7.42754	1.10634e-13	1.21541e-12
MYBPC1	4.72485	-1.01076	0.233417	-4.33026	1.48936e-05	5.42311e-05
PAX5	4.3284	2.28034	0.337015	6.76627	1.32144e-11	1.11288e-10
SPOCK3	32.1273	1.61169	0.217881	7.3971	1.3919e-13	1.50869e-12
CCDC189	668.531	1.15837	0.155327	7.45761	8.81054e-14	9.80035e-13
KIF19	39.1661	1.37022	0.176749	7.75238	9.01877e-15	1.1352e-13
CTSE	1437.67	1.40403	0.157658	8.90552	5.31343e-19	1.03679e-17
SFTA2	2669.77	-1.06241	0.137806	-7.70942	1.2639e-14	1.55828e-13
GRM7	64.8127	2.02877	0.303854	6.67681	2.44201e-11	1.98403e-10
ADH7	155.555	2.46208	0.322432	7.63598	2.24117e-14	2.6782e-13
CPNE4	26.0362	2.20192	0.15205	14.4815	1.58487e-47	4.04989e-45
NBPF4	1.68569	1.07166	0.361237	2.96664	0.00301071	0.00731663
ARL9	27.1087	1.25417	0.104181	12.0384	2.23198e-33	1.57115e-31
MME	1302.95	-1.67431	0.139066	-12.0397	2.1977e-33	1.55288e-31
SULF2	1635.57	1.06874	0.0912625	11.7106	1.12513e-31	6.62086e-30
AJAP1	34.473	-1.32137	0.171699	-7.69585	1.4056e-14	1.7216e-13
ALKAL1	10.7815	1.82034	0.368605	4.93846	7.87403e-07	3.4765e-06
LCE1B	0.368374	1.76757	0.713366	2.47779	0.0132199	0.0275228
S100A2	5629.29	3.80081	0.202402	18.7785	1.13222e-78	7.04013e-75
SPRR2B	1.46095	3.12828	0.922842	3.38984	0.000699346	0.0019264
MVB12B	173.757	-1.20082	0.098133	-12.2367	1.97927e-34	1.57112e-32
HIST3H2BB	37.414	1.23875	0.190748	6.49415	8.35033e-11	6.32171e-10
HCAR1	56.5809	1.4858	0.133622	11.1195	1.00863e-28	4.83676e-27
TMEM26	50.4117	-1.15511	0.136749	-8.44695	2.99024e-17	4.84201e-16
ZNF705A	3.39614	-1.21973	0.251692	-4.84612	1.259e-06	5.40516e-06
DTHD1	368.606	1.42817	0.21295	6.70658	1.99241e-11	1.63584e-10
LCE1C	1.64099	3.76076	0.667081	5.63763	1.72409e-08	9.52078e-08
SULT1A2	216.658	-1.09251	0.0881029	-12.4004	2.59951e-35	2.28732e-33
NEK5	248.139	1.32413	0.203275	6.51398	7.31832e-11	5.58119e-10
ADGRA1	20.6334	1.63963	0.235749	6.955	3.52551e-12	3.21432e-11
FBXL22	104.148	1.14318	0.136422	8.37977	5.30333e-17	8.39086e-16
OR6N1	64.5305	-1.3191	0.259733	-5.07868	3.80072e-07	1.76015e-06
FABP12	6.22113	-1.96843	0.36369	-5.41239	6.21883e-08	3.2091e-07
OGDHL	6.53706	2.40486	0.234591	10.2513	1.16791e-24	3.68633e-23
CYP2F1	371.071	2.02011	0.270123	7.47846	7.51987e-14	8.43002e-13
GYPE	18.286	-1.03147	0.250007	-4.12576	3.69519e-05	0.000125464
SLC28A3	81.6646	1.79691	0.169253	10.6167	2.49166e-26	9.4088e-25
COL4A6	143.398	1.25212	0.123713	10.1211	4.45239e-24	1.33101e-22
SERPINB13	63.1407	3.49824	0.412354	8.48359	2.18355e-17	3.59188e-16
DNAH10	349.047	1.29964	0.194786	6.67214	2.52094e-11	2.04371e-10
KLHL14	21.6877	1.12522	0.135098	8.32892	8.15859e-17	1.26614e-15
CFAP43	1097.27	1.7106	0.249456	6.8573	7.01757e-12	6.13429e-11
CFAP299	282.388	1.47796	0.267731	5.5203	3.38412e-08	1.8065e-07
CYP2A13	31.6987	1.68015	0.308259	5.45045	5.02416e-08	2.62523e-07
PRB3	14.505	1.22347	0.239991	5.09797	3.43314e-07	1.59984e-06
UGT2B17	13.7862	1.53678	0.267238	5.7506	8.89283e-09	5.11841e-08
MEIG1	86.4093	1.21367	0.171006	7.09723	1.27286e-12	1.23666e-11
NRAP	1.17252	1.66233	0.267906	6.20488	5.47384e-10	3.74575e-09
AADACL2	9.34112	1.33269	0.302523	4.40526	1.05658e-05	3.9309e-05
CCDC151	67.9417	1.16702	0.186498	6.25757	3.91034e-10	2.72177e-09
AKR1B10	5.52915	1.34368	0.348524	3.85535	0.000115566	0.000362193
SULT1C4	300.495	-1.02578	0.096822	-10.5944	3.16229e-26	1.18453e-24
NUP62CL	118.363	1.1792	0.161115	7.31901	2.49815e-13	2.63131e-12
ADH4	26.0255	1.04264	0.147482	7.06964	1.55339e-12	1.48829e-11
MB	185.265	2.11405	0.266909	7.92049	2.36568e-15	3.19084e-14
BPIFA1	1705.78	3.65357	0.401051	9.10998	8.23974e-20	1.74268e-18
AC092143.1	2.4661	2.26041	0.691286	3.26986	0.00107601	0.00285031
HOXC4	19.9237	1.60068	0.202202	7.91628	2.44716e-15	3.2936e-14
KRTAP13.1	1.24817	1.23162	0.540419	2.27902	0.0226661	0.0443852
NTRK1	117.402	1.09404	0.123594	8.85185	8.60793e-19	1.64352e-17
B3GNT6	12.1477	2.19827	0.259801	8.46133	2.64343e-17	4.31791e-16
CNGA1	21.4453	1.11567	0.135234	8.2499	1.58524e-16	2.39248e-15
C2CD4A	39.3909	1.16768	0.21905	5.33064	9.78669e-08	4.93275e-07
KCNRG	157.484	1.59173	0.248511	6.40507	1.50297e-10	1.1012e-09
SH2D1B	12.486	-2.06318	0.2764	-7.46447	8.36362e-14	9.34221e-13
ARC	98.5423	-1.83191	0.299933	-6.10772	1.01068e-09	6.65483e-09
FAM3D	171.221	1.77415	0.220361	8.05111	8.20442e-16	1.15768e-14
TAT	4.11134	1.02261	0.341766	2.99215	0.00277023	0.00678786
PAPSS2	2208.12	-1.13351	0.0947826	-11.959	5.82299e-33	3.96431e-31
ABCA4	56.129	1.31963	0.131167	10.0607	8.23916e-24	2.41656e-22
SMOC1	79.1443	1.61898	0.126107	12.8382	1.00149e-37	1.12541e-35
F5	203.563	1.05317	0.130349	8.07959	6.49857e-16	9.23966e-15
APCDD1L	6.65166	1.23383	0.211946	5.82146	5.8336e-09	3.44803e-08
RCSD1	294.92	-1.11501	0.108299	-10.2957	7.37181e-25	2.37093e-23
MUC2	1.62992	2.62851	0.479198	5.48523	4.12925e-08	2.18145e-07
SCAMP5	117.2	1.5547	0.12676	12.2649	1.39806e-34	1.11929e-32
PAX9	141.879	2.34503	0.212802	11.0198	3.06908e-28	1.37622e-26
SOWAHA	12.0635	1.65225	0.205211	8.05147	8.18063e-16	1.1552e-14
MFAP3L	70.1866	-1.14193	0.115806	-9.86069	6.16243e-23	1.70555e-21
RORB	11.0787	2.14699	0.326338	6.57903	4.73533e-11	3.69748e-10
ECT2L	246.715	1.81012	0.255704	7.07894	1.45265e-12	1.39607e-11
METTL11B	0.727701	2.56772	0.651929	3.93866	8.19394e-05	0.000262448
TMEM244	5.99093	1.48601	0.30839	4.81861	1.44562e-06	6.13293e-06
FAM229B	1474.81	1.08534	0.124555	8.71375	2.93977e-18	5.278e-17
FANK1	1058.27	1.63868	0.186759	8.77426	1.72026e-18	3.16467e-17
PLPP4	19.992	1.05302	0.202863	5.1908	2.09394e-07	1.00542e-06
SMIM9	18.3981	-1.17709	0.332769	-3.53724	0.000404328	0.00116036
CCDC160	50.6423	1.72698	0.196737	8.77809	1.66273e-18	3.06487e-17
C1orf141	100.027	1.65358	0.27575	5.99665	2.01432e-09	1.27115e-08
LDLRAD1	808.918	1.71955	0.259391	6.62919	3.37544e-11	2.69198e-10
LCN8	7.66526	2.02848	0.499531	4.06076	4.89132e-05	0.000162614
AL355987.1	64.9881	1.04971	0.279767	3.75209	0.000175366	0.000534871
C1orf185	1.79789	1.36964	0.47872	2.86104	0.00422248	0.00993644
IFIT1B	2.4011	-1.44289	0.249142	-5.79144	6.97845e-09	4.07947e-08
LRIT2	0.438728	1.14096	0.385579	2.95909	0.00308551	0.00748175
LRRC73	86.9721	1.47	0.194202	7.56944	3.74845e-14	4.36476e-13
C2orf72	63.084	-1.37451	0.133064	-10.3297	5.17466e-25	1.68755e-23
GPRIN2	634.48	-1.45022	0.11946	-12.1398	6.49563e-34	4.86624e-32
SYT15	615.934	-1.03872	0.0859839	-12.0804	1.34115e-33	9.69685e-32
TXNDC8	5.85655	2.23127	0.496084	4.49778	6.86682e-06	2.63404e-05
COL5A2	197.747	1.4463	0.24544	5.89267	3.80007e-09	2.30675e-08
COL15A1	147.222	1.23608	0.12036	10.2699	9.62748e-25	3.06469e-23
NOTCH4	2018.06	-1.2735	0.0914534	-13.9251	4.46061e-44	8.15767e-42
AGER	12769.5	-2.34389	0.152159	-15.4042	1.53384e-53	7.15305e-51
SLC44A4	787.313	1.48834	0.169592	8.77601	1.69376e-18	3.11899e-17
VWA7	351.612	1.04019	0.129915	8.00674	1.17786e-15	1.63116e-14
MPIG6B	104.082	-1.41563	0.12224	-11.5807	5.16214e-31	2.88307e-29
AL662899.1	22.3431	-1.70804	0.232648	-7.34174	2.10828e-13	2.23046e-12
LY6G6F	32.2657	-2.62413	0.278569	-9.42002	4.50994e-21	1.05689e-19
C6orf15	1.15306	2.59697	0.47208	5.50112	3.77379e-08	2.00217e-07
MUC21	131.484	1.11768	0.216837	5.15448	2.54334e-07	1.20568e-06
DPRX	9.2947	-1.68448	0.287584	-5.85736	4.70293e-09	2.81506e-08
TRIM15	2.3024	-1.52324	0.582075	-2.61691	0.00887291	0.0193336
TRIM10	1.43747	-2.39717	0.361692	-6.62766	3.41056e-11	2.71767e-10
TRIM40	2.14593	-1.81596	0.271322	-6.69303	2.18601e-11	1.78771e-10
C9orf135	407.223	1.75833	0.297492	5.91052	3.41021e-09	2.08503e-08
TTC25	75.3585	1.01446	0.168566	6.01815	1.76427e-09	1.124e-08
IGFL2	243.022	4.22658	0.221352	19.0944	2.81043e-81	2.62129e-77
KRT40	12.98	1.83358	0.261518	7.01129	2.36134e-12	2.20683e-11
ERICH4	52.8179	-1.67488	0.15612	-10.7282	7.50801e-27	2.98623e-25
PRSS1	5.65076	2.05701	0.284608	7.22752	4.91885e-13	5.014e-12
LGALS7	173.57	3.15896	0.32968	9.58189	9.52864e-22	2.36366e-20
TMEM231	1125.81	1.41816	0.171644	8.26223	1.42971e-16	2.163e-15
C2orf91	62.0939	-1.76264	0.171571	-10.2735	9.27412e-25	2.9674e-23
TMEM88B	6.81905	1.4392	0.269109	5.34802	8.89211e-08	4.50131e-07
C4orf47	412.33	1.41829	0.198492	7.14531	8.97899e-13	8.8434e-12
MUC12	311.899	1.29531	0.117155	11.0564	2.04045e-28	9.39814e-27
CTXN3	1.03115	1.81105	0.469774	3.85515	0.00011566	0.000362427
MGAT4D	5.0586	1.79208	0.319073	5.61651	1.94852e-08	1.06962e-07
CFI	3500.63	1.03577	0.073875	14.0205	1.16758e-44	2.24437e-42
KRT6A	28.3659	2.9285	0.463947	6.31213	2.75221e-10	1.94912e-09
TP53TG3C	1.35691	1.66596	0.457033	3.64517	0.000267215	0.000790082
ARSH	0.952557	1.41238	0.295949	4.77237	1.82074e-06	7.56351e-06
CRLF2	23.2758	1.13365	0.149935	7.56093	4.00206e-14	4.64269e-13
KLRC3	22.5601	-1.28502	0.208094	-6.1752	6.60807e-10	4.46943e-09
TTC23L	91.0261	1.16989	0.18521	6.31653	2.67494e-10	1.9014e-09
C18orf63	4.43731	-1.2791	0.232096	-5.51111	3.56587e-08	1.89888e-07
DEFA1	1450.45	-2.64073	0.420074	-6.28635	3.25023e-10	2.27419e-09
SERPINB11	62.6887	1.57162	0.359793	4.36813	1.25312e-05	4.60969e-05
SERPINB4	89.8597	3.31863	0.400561	8.28495	1.18159e-16	1.80076e-15
SERPINB5	9.54608	1.80074	0.284687	6.32533	2.5269e-10	1.80187e-09
CFAP99	210.452	1.72679	0.232446	7.42877	1.09609e-13	1.20486e-12
HBA1	18826.4	-1.34336	0.240363	-5.5889	2.28517e-08	1.24351e-07
ELOA2	0.677673	1.10554	0.322635	3.42661	0.000611172	0.00170085
ANKUB1	153.525	1.7452	0.22745	7.6729	1.68154e-14	2.04215e-13
TMEM200C	14.6655	1.55481	0.144294	10.7753	4.50374e-27	1.83035e-25
CD200R1L	18.7483	1.63086	0.340098	4.79527	1.62456e-06	6.81462e-06
LNP1	7.46511	1.24945	0.546391	2.28674	0.0222113	0.0435769
GPX3	2770.42	-1.28369	0.123195	-10.4199	2.01091e-25	6.87025e-24
DIO2	166.037	2.57798	0.197532	13.0509	6.28035e-39	7.86266e-37
DIO1	55.2468	1.06888	0.151648	7.04845	1.80927e-12	1.71321e-11
KRTAP29.1	1.17444	2.134	0.367447	5.80764	6.33586e-09	3.72799e-08
KRTAP2.3	5.45449	3.78825	0.427985	8.85136	8.6459e-19	1.6474e-17
KRTAP3.2	2.96719	1.88949	0.51215	3.68934	0.00022484	0.00067322
CGB8	2.87264	2.50628	0.640533	3.9128	9.12312e-05	0.000290117
CFAP45	255.398	1.32428	0.202685	6.53366	6.41827e-11	4.92504e-10
ACKR1	48.0462	1.76623	0.204181	8.65035	5.13436e-18	9.03551e-17
EMP2	1238.18	-1.04557	0.119928	-8.71831	2.82375e-18	5.07459e-17
UBD	1402.34	1.22425	0.186011	6.58159	4.65449e-11	3.63893e-10
FBXO16	155.081	1.23558	0.10405	11.8748	1.59949e-32	1.036e-30
SOGA3	21.8278	-1.33351	0.149669	-8.90973	5.11565e-19	1.00093e-17
FAM187A	153.364	1.40791	0.170172	8.27342	1.30174e-16	1.97099e-15
SEC14L6	407.668	-1.13477	0.119229	-9.5176	1.77218e-21	4.29327e-20
EML6	106.293	1.11514	0.109563	10.1781	2.48407e-24	7.59637e-23
MS4A18	3.31709	1.27347	0.328662	3.87471	0.000106751	0.000336033
FER1L6	7.85311	2.11993	0.273908	7.73955	9.97714e-15	1.24574e-13
RAD51AP2	2.34779	1.74483	0.195095	8.94351	3.77005e-19	7.48155e-18
GPR33	1.23727	1.06654	0.326767	3.26391	0.00109886	0.0029063
TCP11X2	6.7498	1.41341	0.377317	3.74595	0.000179709	0.000547225
CXorf49B	12.0074	1.19937	0.172747	6.94291	3.84113e-12	3.48335e-11
CXorf49	12.0074	1.19937	0.172747	6.94291	3.84113e-12	3.48335e-11
PRSS41	4.995	-1.50354	0.266482	-5.64218	1.67912e-08	9.2972e-08
MUC5AC	124.446	4.23356	0.4041	10.4765	1.10747e-25	3.89055e-24
FAM166B	535.897	1.55048	0.250932	6.17888	6.45586e-10	4.376e-09
C5orf49	609.169	1.72165	0.251848	6.83606	8.13982e-12	7.05577e-11
AC131097.2	11.7955	1.10716	0.202989	5.45427	4.91745e-08	2.57452e-07
SYCE3	4.73146	1.9466	0.710383	2.74022	0.0061399	0.0138963
PLXNA4	116.152	1.76859	0.120622	14.6622	1.12589e-48	3.23114e-46
KRTAP1.3	0.796851	2.6907	0.638383	4.21488	2.49916e-05	8.76139e-05
HEPN1	1.92819	1.16233	0.459691	2.52851	0.0114548	0.0242403
TAS2R40	3.55599	-1.58414	0.344741	-4.59516	4.32408e-06	1.70965e-05
DCDC2B	503.899	1.66052	0.237696	6.9859	2.83037e-12	2.61504e-11
CKMT1A	154.466	1.94564	0.180608	10.7727	4.63158e-27	1.87821e-25
TINCR	86.8442	-1.7076	0.116734	-14.6281	1.85817e-48	5.02353e-46
ETDB	3.36631	1.56662	0.452651	3.46098	0.000538216	0.00151135
C4B	5201.35	1.45398	0.125717	11.5655	6.16177e-31	3.40574e-29
Z82206.1	16.4402	-1.04265	0.144338	-7.22363	5.06175e-13	5.14841e-12
ZNF469	50.1883	1.67925	0.124285	13.5112	1.34281e-41	2.05318e-39
ELFN1	39.7413	1.04091	0.134272	7.75221	9.03055e-15	1.13591e-13
CROCC2	203.147	1.39189	0.211297	6.58735	4.47758e-11	3.51092e-10
AC013470.2	101.032	1.61227	0.273161	5.90227	3.58531e-09	2.18421e-08
C13orf42	7.18382	-1.51551	0.201443	-7.52329	5.34148e-14	6.12039e-13
RD3L	0.713298	-1.35303	0.367001	-3.68673	0.000227152	0.000679489
MRLN	110.476	1.82358	0.207152	8.80314	1.3304e-18	2.47924e-17
CLDN25	0.935818	2.16086	0.783896	2.75656	0.00584128	0.0132866
CT45A5	9.82715	-3.10837	0.58261	-5.33524	9.54174e-08	4.81449e-07
RFPL4AL1	2.16636	1.03258	0.447243	2.30878	0.020956	0.0413928
ANKRD66	335.481	1.68163	0.281823	5.96699	2.41676e-09	1.51384e-08
STMND1	439.6	1.72068	0.246693	6.97499	3.05886e-12	2.81222e-11
TSPAN19	412.941	1.87914	0.252341	7.44685	9.55928e-14	1.05764e-12
CYP21A2	54.8539	1.0759	0.110358	9.74917	1.85974e-22	4.91383e-21
DYTN	3.44322	-1.76431	0.381316	-4.62689	3.71192e-06	1.47859e-05
TMEM229A	8.91298	2.63654	0.237394	11.1062	1.17044e-28	5.55558e-27
MCIDAS	36.7872	1.99901	0.293945	6.80064	1.04158e-11	8.90449e-11
SHISA8	15.3225	2.93871	0.248181	11.841	2.39587e-32	1.52534e-30
C19orf81	29.5962	-1.02522	0.151394	-6.77183	1.2716e-11	1.07283e-10
C12orf75	1463.14	1.14476	0.132962	8.6097	7.32545e-18	1.27234e-16
CLEC2L	5.1517	1.28108	0.313467	4.08681	4.37336e-05	0.000146438
C4orf51	23.2883	-1.96115	0.311585	-6.29412	3.09152e-10	2.17292e-09
CKMT1B	143.853	2.02115	0.1816	11.1297	8.9927e-29	4.34585e-27
BHMG1	0.518633	1.11932	0.349469	3.20291	0.00136045	0.00353256
AMY1A	135.896	1.04477	0.22264	4.69264	2.69708e-06	1.09682e-05
OR2I1P	122.069	1.11302	0.188957	5.89032	3.8545e-09	2.33599e-08
OR2W3	20.5174	-1.12427	0.184814	-6.08324	1.17776e-09	7.6764e-09
TXNDC5	8047.05	1.09668	0.0852338	12.8667	6.93222e-38	7.98232e-36
OR1J4	1.10218	1.52375	0.429193	3.55027	0.000384838	0.00110903
SMKR1	36.2585	1.29469	0.327008	3.95921	7.51978e-05	0.000241821
UGT1A5	1.15414	2.64519	0.75294	3.51315	0.00044283	0.0012627
DEFA1B	3820.27	-2.88688	0.541848	-5.32785	9.93846e-08	5.00519e-07
KIR3DL2	17.6299	-1.30931	0.166546	-7.86154	3.79452e-15	4.98121e-14
TNFRSF13B	174.165	1.90023	0.185767	10.2291	1.46925e-24	4.59084e-23
C1QTNF9	18.0536	1.16485	0.169835	6.85874	6.94692e-12	6.08355e-11
PLCXD2	466.178	-1.17857	0.131153	-8.98625	2.55821e-19	5.20401e-18
UGT1A1	29.3681	1.29781	0.124012	10.4652	1.2486e-25	4.36167e-24
INMT	6415.42	-1.26976	0.117255	-10.8291	2.50605e-27	1.04581e-25
UGT1A8	1.25784	2.90681	0.708565	4.10239	4.08897e-05	0.000137557
UGT1A10	2.60458	2.2191	0.634476	3.49754	0.000469568	0.00133283
PSG11	7.60962	1.57626	0.419797	3.75482	0.000173469	0.000529693
UGT1A3	2.34921	3.76703	0.637749	5.90676	3.48902e-09	2.12902e-08
WFDC6	247.679	1.21412	0.332917	3.6469	0.000265421	0.000785151
UPK3B	2652.22	-1.23344	0.205685	-5.99675	2.01311e-09	1.27081e-08
SMIM34A	42.7955	1.04706	0.177673	5.8932	3.78777e-09	2.30019e-08
CFB	4848.23	1.43696	0.123198	11.6638	1.95028e-31	1.12286e-29
CFAP57	213.341	1.5294	0.221342	6.90968	4.85743e-12	4.35e-11
KIR2DL3	18.596	-1.76484	0.180016	-9.80378	1.08452e-22	2.92349e-21
TUBA4B	598.067	1.80516	0.264843	6.81595	9.36398e-12	8.057e-11
GSTA1	88.0441	2.19577	0.383086	5.7318	9.93718e-09	5.68091e-08
LY6G6D	9.50008	-1.22222	0.262806	-4.65067	3.3086e-06	1.32843e-05
UGT1A4	4.2457	2.89064	0.370012	7.81231	5.61508e-15	7.23368e-14
RAD21L1	1.45697	-1.0533	0.317947	-3.31281	0.000923626	0.00248476
CCDC13	294.879	1.06141	0.144573	7.34169	2.10921e-13	2.23046e-12
PTCHD4	86.6003	1.37806	0.129502	10.6412	1.91664e-26	7.35659e-25
C4A	6045.43	1.47226	0.125134	11.7654	5.883e-32	3.58632e-30
HBB	85770.6	-1.16204	0.240144	-4.83894	1.30535e-06	5.59127e-06
CCDC153	467.607	1.14683	0.158725	7.22526	5.00158e-13	5.08999e-12
C4orf54	1.18336	1.0944	0.256741	4.26266	2.0201e-05	7.19222e-05
SMIM31	75.9157	2.41377	0.227303	10.6192	2.42745e-26	9.1849e-25
EPPIN.WFDC6	10.8164	1.14424	0.35486	3.2245	0.00126195	0.00329697
SPATS1	119.529	1.90217	0.339785	5.59815	2.16655e-08	1.18206e-07
CLRN2	0.65328	-1.33236	0.565431	-2.35635	0.0184553	0.0370018
TMEM158	148.118	1.24694	0.180216	6.91918	4.54275e-12	4.08577e-11
GYPB	22.698	-1.20275	0.221273	-5.43559	5.46163e-08	2.83871e-07
LY6G6F.LY6G6D	6.31984	-1.98264	0.242603	-8.17235	3.02444e-16	4.42841e-15
AC010255.3	61.2616	2.03399	0.288753	7.04403	1.86753e-12	1.76479e-11
IGLL5	20810.8	2.95423	0.207271	14.253	4.29388e-46	9.65037e-44
MEX3A	4.23872	1.35507	0.411259	3.29493	0.000984471	0.00262798
INMT.MINDY4	96.3455	-1.22286	0.133812	-9.13864	6.32433e-20	1.35291e-18
SAA2.SAA4	190.422	2.40875	0.31842	7.56468	3.88829e-14	4.51632e-13
OR8G5	11.0429	1.39004	0.287699	4.83157	1.35462e-06	5.78371e-06
AL096711.2	110.606	-2.36578	0.142741	-16.5739	1.07536e-61	1.11443e-58
LY6G6E	51.1861	-2.43964	0.272126	-8.96512	3.0995e-19	6.2237e-18
AC068775.1	30.7801	-1.05795	0.210529	-5.0252	5.02914e-07	2.29037e-06
AP002748.4	17.4978	1.0075	0.294598	3.41991	0.00062641	0.0017404
CLEC12B	43.4809	-1.2058	0.148689	-8.10956	5.08019e-16	7.27849e-15
CAPNS2	24.5764	1.2441	0.217684	5.71518	1.0959e-08	6.23617e-08
GPR142	8.52423	2.12614	0.230135	9.23866	2.496e-20	5.4971e-19
AC011604.2	0.42114	1.85397	0.688514	2.69271	0.00708737	0.0158124
C11orf97	359.946	1.66633	0.293345	5.68046	1.34336e-08	7.54789e-08
NHLRC4	220.521	1.33651	0.184663	7.23755	4.56857e-13	4.66971e-12
MGAM2	5.62981	-1.67306	0.231955	-7.21288	5.47799e-13	5.54419e-12
AC025263.2	0.872002	-1.97922	0.685225	-2.88842	0.00387181	0.00918774
AL355102.2	36.4542	2.13583	0.228349	9.35334	8.49216e-21	1.96055e-19
C20orf141	1.81722	1.74264	0.569881	3.0579	0.00222897	0.00556468
TUBB3	126.327	2.00316	0.160764	12.4603	1.22981e-35	1.10293e-33
TMEM179	4.39663	1.6192	0.234809	6.89581	5.35589e-12	4.77575e-11
SMIM6	258.273	1.11984	0.157168	7.12515	1.03967e-12	1.01913e-11
AC136428.1	316.422	3.1451	0.370712	8.48394	2.17693e-17	3.58416e-16
TGFBR3L	39.7153	1.25631	0.157586	7.97225	1.55812e-15	2.13244e-14
AC009163.2	0.912065	1.66096	0.354739	4.68222	2.83782e-06	1.1503e-05
CCDC187	202.606	1.76772	0.271052	6.52168	6.95257e-11	5.31312e-10
ARMH2	81.2717	1.15134	0.240786	4.78158	1.73921e-06	7.25475e-06
SERTM2	15.0517	1.24269	0.283775	4.37913	1.19153e-05	4.39611e-05
TUBB8	10.2377	1.20827	0.254046	4.7561	1.97364e-06	8.15603e-06
AL929554.1	4.88106	1.37111	0.473494	2.89572	0.00378286	0.00899611
MMP12	144.653	1.96538	0.28808	6.82234	8.95664e-12	7.72433e-11
AC018512.1	3.21557	1.17964	0.251918	4.68264	2.83198e-06	1.14843e-05
C19orf84	2.31379	-1.70534	0.414205	-4.11714	3.83603e-05	0.00012975
MYZAP	145.504	-2.2087	0.189615	-11.6484	2.33898e-31	1.33429e-29
TMEM238L	8.67277	1.1002	0.26219	4.19618	2.71451e-05	9.45768e-05
MSMB	403.96	3.68818	0.551935	6.68228	2.35249e-11	1.91547e-10
AC073508.2	13.9542	1.40013	0.251324	5.571	2.53283e-08	1.37228e-07
LCN6	575.728	1.19516	0.173933	6.87137	6.35887e-12	5.60049e-11
AC020922.1	2.85615	1.96306	0.378202	5.1905	2.09729e-07	1.00657e-06
SMIM22	3402.25	1.00664	0.131604	7.64902	2.02523e-14	2.43106e-13
TCP11X1	3.8483	1.08744	0.40836	2.66295	0.00774595	0.01712
AC008537.1	3.71553	-1.14646	0.472958	-2.42401	0.0153501	0.0313969
CSAG2	2.86701	-1.57671	0.308726	-5.10716	3.27043e-07	1.52631e-06
CSAG3	5.19539	-1.75904	0.263395	-6.67834	2.41662e-11	1.96597e-10
CT45A1	16.4059	-3.32364	0.750726	-4.42723	9.54507e-06	3.57897e-05
CT45A3	45.1546	-3.48236	0.704692	-4.94168	7.74519e-07	3.42286e-06
SPIB	100.708	1.78576	0.182377	9.79159	1.22354e-22	3.27459e-21
NXF2B	48.2164	1.19905	0.246579	4.86274	1.15774e-06	4.99572e-06
ERVV.1	2.01076	1.58874	0.280396	5.66604	1.46139e-08	8.17412e-08
CT45A10	12.2676	-2.34279	0.692143	-3.38484	0.000712206	0.00195749
RNF225	13.3146	2.22618	0.222878	9.98832	1.71459e-23	4.9206e-22
GAS2L2	264.302	1.66061	0.237688	6.98651	2.81806e-12	2.60625e-11
CD24	328.209	1.30412	0.159214	8.19097	2.59132e-16	3.82123e-15
CFAP206	57.2669	1.40763	0.241785	5.82183	5.82051e-09	3.44248e-08
AGBL1	18.9371	-1.71667	0.187779	-9.14197	6.13226e-20	1.31635e-18
HIST1H3G	3.38157	1.05845	0.180436	5.86608	4.46226e-09	2.67822e-08
TBC1D3H	17.4307	-1.50444	0.620361	-2.4251	0.0153042	0.0313135
GGTLC3	96.9799	-1.04875	0.198135	-5.2931	1.20258e-07	5.97574e-07
CBSL	189.265	-1.15705	0.27293	-4.23937	2.24144e-05	7.92493e-05
C8orf89	13.5284	1.23698	0.191611	6.45568	1.07734e-10	8.06445e-10
TBC1D3	14.0314	5.40447	1.46755	3.68265	0.000230822	0.000689692
AC117457.1	4.43928	2.06866	0.594195	3.48145	0.000498715	0.00140934
CCL4	289.673	-1.00659	0.173785	-5.79215	6.94909e-09	4.06486e-08
CCL15.CCL14	581.858	1.14668	0.152905	7.49928	6.41715e-14	7.25488e-13
PRSS2	166.654	5.30454	0.320893	16.5305	2.21193e-61	2.17165e-58
DUSP14	157.83	1.50661	0.17644	8.53894	1.35461e-17	2.27239e-16
ANKRD20A3	66.4531	-1.19858	0.128649	-9.31669	1.20027e-20	2.7205e-19
KCNE1B	137.205	1.18443	0.211923	5.58897	2.28415e-08	1.24332e-07
DACH1	32.3735	-1.08847	0.176867	-6.15419	7.54598e-10	5.06341e-09
SRCIN1	219.723	1.0631	0.157526	6.74875	1.49124e-11	1.24241e-10
AC007906.2	1508.8	1.88448	0.232138	8.11795	4.74136e-16	6.81922e-15
FO681492.1	405.527	-1.64433	0.127991	-12.8472	8.91739e-38	1.0143e-35
AC007731.4	7.19945	1.14519	0.368956	3.10386	0.00191016	0.00483017
AC009336.2	7.2679	1.14575	0.224148	5.11157	3.19492e-07	1.49368e-06
ELOA3B	1.11557	1.41164	0.570593	2.47399	0.0133614	0.0277801
OR2S2	1.69205	-1.26111	0.35825	-3.5202	0.000431226	0.00123194
SMIM34B	42.7955	1.04706	0.177673	5.8932	3.78777e-09	2.30019e-08
AL132671.2	23.4059	-1.04541	0.224951	-4.6473	3.36303e-06	1.34941e-05
C1orf232	3.24294	2.28293	0.782652	2.91692	0.00353509	0.00846733
C13orf46	88.0726	-1.34164	0.142739	-9.3993	5.49296e-21	1.28082e-19
SPRR5	6.7043	2.37644	0.377114	6.30165	2.94485e-10	2.07609e-09
CTXND2	3.0302	1.57382	0.263677	5.96874	2.39088e-09	1.49814e-08
CFAP97D2	96.1494	1.58282	0.301467	5.25041	1.51761e-07	7.44009e-07
FAM95C	133.053	1.43276	0.162664	8.80808	1.27307e-18	2.37955e-17
VSIG10L2	28.8327	2.79786	0.272393	10.2714	9.48167e-25	3.02344e-23
SLURP2	2.48298	2.30337	0.992225	2.32142	0.020264	0.0401962
C2orf81	412.795	1.27138	0.169001	7.52291	5.35686e-14	6.13048e-13
AC008397.1	89.9454	2.02862	0.291795	6.95219	3.59657e-12	3.27571e-11
AC235565.2	5.45598	1.45307	0.359829	4.03824	5.38544e-05	0.000177585
EEF1AKMT4.ECE2	0.883789	1.74126	0.480022	3.62747	0.000286211	0.000842642
AP000812.5	46.9028	1.16753	0.199863	5.84165	5.16867e-09	3.07843e-08
AL034430.1	15.1744	3.08092	1.22375	2.5176	0.0118158	0.0248828
AC067752.1	57.9885	-1.29025	0.188679	-6.8383	8.0139e-12	6.94985e-11
