# Supplementary material for: Machine Learning-Based Integration Identifies Plasma Cells-Related Gene Signature ST6GAL1 in Idiopathic Pulmonary Fibrosis and Its Pan-Cancer Analysis
Source: Research Square preprint supplement (doi:10.21203/rs.3.rs-3399609/v1), 2023-10-11
Supplement: Supplementary file 3 [file 7f08df57a3ca3c98a3838a03.xlsx]

## Sheet: Sheet1
Tag	HR	Lower	Upper	Likelihood	logrank	Wald
TPST1	1.44406	1.31608	1.58449	8.66919e-13	6.8769e-16	8.45375e-15
S100A14	1.62316	1.42774	1.84533	2.29102e-12	8.49282e-15	1.35732e-13
TM4SF1	1.56921	1.39225	1.76867	2.0836e-12	2.42524e-14	1.57395e-13
ADM	1.82279	1.55299	2.13947	5.40672e-12	4.18072e-14	2.04601e-13
TLR2	3.28579	2.38665	4.52367	1.84391e-12	7.86504e-14	3.03858e-13
GALNT14	1.66688	1.43038	1.94249	6.70575e-09	5.31432e-13	5.95982e-11
MET	1.54879	1.36233	1.76078	5.29427e-10	5.74521e-13	2.32249e-11
HS3ST1	2.25608	1.79875	2.82968	3.04675e-13	6.44773e-13	1.93091e-12
LOC100506328	1.60504	1.4068	1.83121	2.96989e-10	1.08756e-12	2.00194e-12
CCL7	1.63668	1.42697	1.8772	1.92143e-12	1.29471e-12	1.88841e-12
MRVI1	1.58275	1.39185	1.79985	2.15199e-11	1.69325e-12	2.531e-12
MMP25	1.74669	1.49744	2.03744	2.15684e-11	1.97045e-12	1.25138e-12
HTRA1	1.65932	1.43607	1.91727	1.06506e-10	2.37856e-12	6.47025e-12
CEACAM7	1.4833	1.32436	1.66133	1.57861e-09	3.52291e-12	9.24362e-12
STAB1	2.00168	1.63405	2.45202	2.49254e-12	9.03939e-12	2.04268e-11
CXCR7	0.47593	0.3818	0.593266	1.15664e-10	9.22762e-12	4.01382e-11
ACOX2	1.91362	1.58786	2.30622	2.36185e-10	9.50075e-12	9.33863e-12
CYR61	1.50507	1.3281	1.70562	1.53458e-09	1.46653e-11	1.49339e-10
CXCL14	1.49678	1.32532	1.69043	8.31881e-10	1.47104e-11	8.18146e-11
BMP6	1.81999	1.51685	2.18372	1.48756e-09	2.91936e-11	1.17963e-10
PLA2G7	1.92842	1.57898	2.3552	1.51799e-10	3.47682e-11	1.21012e-10
PRSS8	1.45459	1.29504	1.6338	3.76234e-09	3.64308e-11	2.59284e-10
SOD3	1.49506	1.32068	1.69246	1.07265e-09	3.708e-11	2.07446e-10
SFTPB	1.46171	1.30017	1.64332	2.91115e-10	5.79932e-11	2.11239e-10
NRG1	1.35748	1.22898	1.49941	1.46042e-07	9.25938e-11	1.70325e-09
SLC34A2	1.45718	1.29393	1.64103	7.57152e-09	1.19758e-10	5.27951e-10
FA2H	1.84733	1.5136	2.25463	7.17678e-08	1.36255e-10	1.5672e-09
MUC21	1.5084	1.31944	1.72442	6.1828e-08	1.37659e-10	1.75142e-09
LOC284751	1.73817	1.46632	2.06042	8.2867e-09	1.48937e-10	1.88136e-10
CEACAM6	1.42619	1.27595	1.59412	9.43567e-10	1.68997e-10	4.08527e-10
CCL2	1.69755	1.45378	1.9822	1.4649e-11	1.7741e-10	2.22314e-11
NKX2-1	1.54194	1.33507	1.78088	1.73051e-07	1.93673e-10	3.82647e-09
MYO1A	0.419827	0.320958	0.549151	2.26865e-09	2.34856e-10	2.37738e-10
SLC36A1	3.01407	2.13185	4.2614	1.7161e-09	3.32311e-10	4.25825e-10
MAL2	1.51738	1.32522	1.73739	9.42859e-09	3.4094e-10	1.58083e-09
RGL1	1.884	1.53936	2.3058	1.78114e-09	3.65851e-10	8.00306e-10
ANO5	0.572724	0.47927	0.6844	2.52811e-08	3.67759e-10	8.66505e-10
C7orf58	0.589448	0.497013	0.699075	1.73902e-07	3.71781e-10	1.25101e-09
SPRY2	2.27081	1.75374	2.94034	2.82063e-10	3.80789e-10	4.93698e-10
LOC388210	1.75925	1.45718	2.12394	2.98667e-07	4.31615e-10	4.17319e-09
S100A12	1.35356	1.23179	1.48737	5.85555e-09	5.05183e-10	3.09072e-10
CSF3R	2.0997	1.65462	2.66449	5.22929e-08	5.31575e-10	1.04027e-09
TIMP1	3.19985	2.20935	4.6344	1.36289e-09	5.35953e-10	7.5329e-10
MERTK	1.71911	1.45068	2.03721	1.07185e-10	5.48576e-10	3.97895e-10
S1PR3	1.53155	1.33613	1.75555	5.99953e-08	6.24174e-10	9.31431e-10
PPP1R3B	3.58594	2.40152	5.35452	1.04858e-08	6.59382e-10	4.29489e-10
OASL	0.435647	0.334062	0.568122	8.70612e-08	6.61522e-10	8.57481e-10
RAB25	1.737	1.44416	2.08924	1.02397e-07	6.78429e-10	4.59202e-09
LOC100131733	0.317564	0.221038	0.456243	1.78262e-08	7.21964e-10	5.48134e-10
IL1R2	1.49054	1.31158	1.69392	6.11274e-10	7.51325e-10	9.58667e-10
LAMB3	1.642	1.41052	1.91147	1.14398e-08	7.54062e-10	1.59202e-10
METTL7B	1.72983	1.44286	2.07387	1.34319e-08	8.6726e-10	3.19175e-09
HOMER3	2.8086	2.00295	3.93831	2.76681e-09	8.91401e-10	2.13616e-09
AATK	1.76248	1.47032	2.1127	1.86927e-09	9.13105e-10	8.86917e-10
PPIF	3.86478	2.49462	5.98749	1.95334e-08	9.8562e-10	1.42412e-09
SFTA3	1.51373	1.31371	1.7442	2.20143e-07	1.0222e-09	9.84331e-09
ZNF445	3.19086	2.18278	4.66451	1.52109e-07	1.11779e-09	2.10616e-09
SCGB3A2	2.06029	1.62051	2.61941	3.28922e-08	1.24043e-09	3.62244e-09
ADAM8	1.78534	1.47773	2.15697	1.0995e-08	1.52673e-09	1.88459e-09
KCNA3	0.32298	0.221961	0.469974	2.02721e-08	1.67334e-09	3.51524e-09
RASSF2	1.87453	1.53081	2.29542	2.42128e-08	1.68084e-09	1.20199e-09
AGR3	1.40528	1.25217	1.57711	3.62692e-08	1.78165e-09	7.43886e-09
FAM20A	1.96433	1.56691	2.46254	3.36692e-09	1.92291e-09	4.79825e-09
STEAP4	1.474	1.29392	1.67915	1.5307e-08	1.97493e-09	5.35326e-09
CDC42EP2	1.79179	1.47012	2.18383	1.62435e-07	2.00875e-09	7.6047e-09
TRIM47	2.19882	1.69467	2.85294	6.35695e-09	2.03637e-09	3.03396e-09
FOXQ1	1.57773	1.34779	1.8469	7.00109e-08	2.10242e-09	1.3975e-08
KCNK1	1.73025	1.43194	2.09069	2.31475e-07	2.35112e-09	1.35767e-08
EMR2	2.71389	1.96003	3.7577	6.89236e-09	2.60647e-09	1.82011e-09
CXCL1	1.76905	1.46606	2.13466	4.52704e-09	2.81719e-09	2.66002e-09
CTSE	1.86198	1.50968	2.29649	2.4721e-08	3.18094e-09	6.28591e-09
IRX2	1.25763	1.16077	1.36256	3.53902e-06	3.22515e-09	2.069e-08
SNAI1	1.8277	1.48771	2.24539	3.76875e-08	3.35114e-09	9.31497e-09
MXD1	2.27195	1.73403	2.97674	1.52342e-07	4.06862e-09	2.63451e-09
PLEKHB1	0.346107	0.240665	0.497747	3.08271e-08	4.47077e-09	1.04456e-08
CEACAM5	1.8355	1.48663	2.26622	8.91178e-07	4.48894e-09	1.63619e-08
SCEL	1.59429	1.35246	1.87936	3.05989e-07	5.14405e-09	2.73955e-08
LGALS3BP	0.336866	0.234133	0.484677	4.87882e-08	5.52003e-09	4.57334e-09
DYSF	1.44249	1.27506	1.63191	7.52034e-07	5.54149e-09	5.88443e-09
LOC100132707	0.176369	0.0971629	0.320144	9.33409e-08	5.8843e-09	1.16787e-08
RAB3IL1	1.60025	1.3654	1.8755	5.36921e-08	5.99797e-09	6.39633e-09
MMP10	1.41348	1.25263	1.59498	3.88882e-08	6.02797e-09	1.97225e-08
PXN	1.59658	1.36216	1.87133	1.62201e-07	6.30823e-09	7.69752e-09
AKAP5	0.567094	0.466679	0.689117	1.25891e-07	6.92458e-09	1.16591e-08
SLC30A1	1.72979	1.42398	2.10126	5.95229e-06	7.37536e-09	3.37085e-08
PCDH20	2.73189	1.90243	3.92301	4.83615e-06	7.4362e-09	5.22887e-08
EFEMP1	1.45782	1.27658	1.66478	2.00884e-07	7.72475e-09	2.62073e-08
GGA2	0.27485	0.177665	0.425196	2.11318e-07	7.76157e-09	6.57127e-09
SLC20A1	3.74378	2.38302	5.88157	1.94057e-08	8.8057e-09	1.01827e-08
IER3	1.40496	1.25058	1.57839	9.56301e-07	9.00655e-09	1.03309e-08
CD24	1.76285	1.45511	2.13567	5.69636e-09	9.57643e-09	6.95925e-09
PHLDA3	0.632521	0.53479	0.748111	2.23681e-05	9.66829e-09	8.85084e-08
MMP1	1.72655	1.42633	2.08997	3.41745e-08	1.05987e-08	2.1e-08
NETO2	3.9501	2.46538	6.32897	2.80768e-09	1.06196e-08	1.11846e-08
GPR110	1.52918	1.31242	1.78174	1.51346e-06	1.09358e-08	5.15507e-08
FBLN5	1.57981	1.34508	1.8555	5.01186e-08	1.12509e-08	2.51583e-08
GABARAPL1	0.208406	0.121501	0.35747	2.3613e-07	1.16041e-08	1.22127e-08
ALDH1A3	1.51174	1.30392	1.75268	1.26222e-06	1.20405e-08	4.32337e-08
GPR84	1.64297	1.39524	1.93469	2.49618e-07	1.27331e-08	2.61676e-09
MATK	2.03534	1.58904	2.60699	1.44453e-08	1.27937e-08	1.83334e-08
GJA1	1.70234	1.40323	2.0652	1.38019e-06	1.50441e-08	6.79963e-08
CCDC115	0.11606	0.0545894	0.246749	4.15683e-08	1.5052e-08	2.19009e-08
SH3D19	1.73154	1.4218	2.10874	2.70796e-07	1.61325e-08	4.76667e-08
TCEA3	0.523166	0.416997	0.656366	4.87885e-08	1.62675e-08	2.16621e-08
ANTXR2	2.43938	1.78666	3.33055	6.036e-08	1.64017e-08	1.99125e-08
MARCKS	1.89611	1.51677	2.37032	6.87143e-08	1.6715e-08	1.9344e-08
C9orf89	3.84508	2.39668	6.16881	1.02774e-07	1.76738e-08	2.34913e-08
COX15	0.522462	0.415118	0.657563	3.18767e-06	1.7902e-08	3.15696e-08
FABP4	0.705719	0.621993	0.800715	1.01677e-05	1.83713e-08	6.32996e-08
KCNJ2	2.27434	1.71002	3.02488	1.37665e-08	1.97129e-08	1.63101e-08
SIGLEC10	1.51731	1.3106	1.75661	6.52621e-08	1.98894e-08	2.40654e-08
PLEKHG2	1.98267	1.57287	2.49925	1.24686e-07	2.05452e-08	6.88738e-09
LOC283454	1.66917	1.37974	2.01933	2.53622e-06	2.0631e-08	1.34253e-07
EPCAM	1.51498	1.30661	1.75658	5.52742e-08	2.26358e-08	3.7462e-08
ALPL	1.3291	1.19933	1.47292	5.23669e-07	2.30694e-08	5.71742e-08
IBSP	1.29165	1.17823	1.41598	1.64659e-06	2.33304e-08	4.82279e-08
TPCN1	1.64979	1.38039	1.97175	3.12156e-07	2.54935e-08	3.71138e-08
MGAM	1.74884	1.43029	2.13834	2.01565e-06	2.77311e-08	5.08342e-08
KRT19	1.39925	1.246	1.57136	1.32348e-07	2.83799e-08	1.37843e-08
LOC100240734	2.29649	1.67748	3.14393	5.55587e-06	2.98076e-08	2.12609e-07
WWC1	1.68703	1.38893	2.04912	3.38638e-06	2.98206e-08	1.35218e-07
C2orf80	1.56046	1.31324	1.85423	4.02326e-05	3.05495e-08	4.27383e-07
KRT23	1.55649	1.3296	1.8221	1.29988e-07	3.12805e-08	3.71904e-08
PTEN	3.84916	2.38538	6.21118	2.50919e-07	3.61043e-08	3.37174e-08
INHBB	1.42998	1.25504	1.62931	8.92396e-07	3.61322e-08	7.7925e-08
CAMK1	1.63341	1.38246	1.9299	5.84222e-07	3.64054e-08	8.14107e-09
EMP1	2.07529	1.59877	2.69384	1.86143e-08	3.7529e-08	4.12386e-08
PIM3	1.62855	1.36737	1.93962	1.57932e-05	3.9259e-08	4.54549e-08
C5orf62	1.8917	1.50321	2.38059	5.14671e-07	3.97826e-08	5.46989e-08
ZBTB4	0.0857945	0.0363745	0.202358	2.39831e-08	3.99703e-08	2.03122e-08
PPP1R14C	1.72214	1.41456	2.09661	1.15642e-07	4.09204e-08	6.13452e-08
PTPLAD2	0.162228	0.0851821	0.30896	9.7095e-08	4.13568e-08	3.14044e-08
C19orf33	1.73858	1.42273	2.12455	3.55228e-07	4.13859e-08	6.41848e-08
PROK2	1.4235	1.25398	1.61592	4.16953e-08	4.1917e-08	4.79879e-08
TBC1D14	4.76536	2.78068	8.16659	1.18965e-07	4.35989e-08	1.33899e-08
AMICA1	0.27262	0.169035	0.43968	4.33557e-07	4.53456e-08	9.84989e-08
LILRA3	2.10907	1.6185	2.74835	8.14578e-07	5.03875e-08	3.30445e-08
ALDH2	0.480585	0.366881	0.629526	5.76629e-06	5.06149e-08	1.03858e-07
CRB3	1.2784	1.16694	1.40051	8.03234e-06	5.15485e-08	1.31469e-07
GRB10	2.24118	1.67293	3.00245	2.09004e-07	5.20101e-08	6.34113e-08
SH3RF1	1.90193	1.51206	2.39233	4.13656e-08	5.34827e-08	3.95876e-08
MAFB	3.25825	2.11547	5.01837	3.7433e-07	5.54119e-08	8.31895e-08
KANK1	1.66211	1.38626	1.99285	1.23496e-08	5.74559e-08	4.07906e-08
METRNL	5.59985	2.98849	10.493	6.85735e-08	6.11291e-08	7.58015e-08
ANGPTL4	1.58905	1.33942	1.88521	9.28847e-08	6.24626e-08	1.08794e-07
RTCD1	7.28425	3.53509	15.0096	1.74071e-08	6.25495e-08	7.31726e-08
MTSS1	1.46327	1.276	1.67803	7.75381e-07	6.69307e-08	5.08408e-08
SFTA2	1.44505	1.25694	1.66131	2.44221e-06	7.28463e-08	2.29447e-07
LRG1	1.80431	1.46253	2.22596	2.68518e-07	7.3761e-08	3.62931e-08
ARAP3	1.77527	1.43334	2.19876	1.67805e-07	7.41108e-08	1.45624e-07
TBC1D4	0.463092	0.348821	0.614797	5.12088e-07	8.07193e-08	1.01122e-07
CCNJL	1.62517	1.34935	1.95738	8.4368e-06	8.09464e-08	3.09795e-07
PLIN4	1.76565	1.44336	2.15992	1.69729e-07	8.20998e-08	3.22807e-08
UCK2	2.79262	1.91157	4.07975	4.02664e-08	8.7759e-08	1.09519e-07
SRGAP1	1.93027	1.52002	2.45125	4.20089e-08	8.86595e-08	6.86409e-08
CXCR4	1.88136	1.48537	2.38291	6.5693e-07	9.1531e-08	1.594e-07
HAMP	1.59542	1.33954	1.90017	5.05931e-07	9.16372e-08	1.62717e-07
B3GNT8	1.45944	1.26619	1.68219	7.76324e-07	9.32958e-08	1.82268e-07
FAM198B	1.77272	1.43718	2.18658	7.70899e-07	9.9511e-08	8.90597e-08
CHST15	1.42921	1.25629	1.62592	2.33013e-07	1.01332e-07	5.70473e-08
C8A	0.627159	0.527179	0.7461	8.04548e-07	1.01811e-07	1.39701e-07
PDCD1LG2	0.58554	0.48068	0.713273	1.32881e-06	1.08801e-07	1.06064e-07
RSPH3	0.250766	0.150374	0.418181	1.21925e-06	1.14653e-07	1.14944e-07
SLC44A1	1.6193	1.34994	1.9424	1.55428e-05	1.19151e-07	2.07515e-07
LAMA3	1.6162	1.34502	1.94206	2.19927e-06	1.19431e-07	3.00731e-07
ATL1	0.57486	0.466202	0.708844	1.48474e-05	1.23289e-07	2.22804e-07
TMEM125	1.32536	1.19505	1.46988	2.05271e-06	1.26924e-07	9.59094e-08
CLEC4G	1.54967	1.31861	1.82122	3.26957e-07	1.2916e-07	1.05278e-07
ABCB6	2.3339	1.7047	3.19536	4.3562e-08	1.29827e-07	1.23887e-07
PRKCB	1.64198	1.37333	1.96319	3.6845e-06	1.39165e-07	5.32699e-08
SPP1	1.42224	1.25048	1.6176	1.02303e-07	1.40388e-07	8.15156e-08
PTGIR	1.45329	1.26339	1.67172	1.29321e-06	1.52489e-07	1.67223e-07
SFTPA1	1.50063	1.28601	1.75107	7.45846e-07	1.53442e-07	2.54484e-07
TREML2	1.83173	1.47223	2.27902	1.79821e-07	1.76313e-07	5.64629e-08
LEP	1.47014	1.2625	1.71193	5.65756e-06	1.79806e-07	7.03518e-07
FAM27E3	1.51761	1.29881	1.77327	1.34936e-06	1.82028e-07	1.51033e-07
MBOAT7	2.34561	1.70559	3.22581	1.66783e-06	1.82746e-07	1.57042e-07
MAPK13	2.22062	1.65488	2.97978	3.18175e-06	1.87046e-07	1.05281e-07
SGK1	2.74308	1.87327	4.01678	3.2562e-07	1.87359e-07	2.15352e-07
SLCO4A1	1.48386	1.2716	1.73155	3.85521e-06	1.94468e-07	5.42485e-07
LCP2	3.80803	2.30436	6.29289	3.9593e-07	1.99805e-07	1.81566e-07
RBM28	5.28947	2.8627	9.77346	1.1081e-06	2.00794e-07	1.05151e-07
FAM57A	1.77964	1.42929	2.21588	6.11539e-07	2.08621e-07	2.56241e-07
GPR56	1.44596	1.26502	1.65278	1.16655e-06	2.10639e-07	6.42208e-08
NLRP3	1.95923	1.52731	2.5133	1.15579e-06	2.15936e-07	1.20358e-07
KCNJ15	1.25857	1.15414	1.37246	1.9243e-05	2.22854e-07	1.95637e-07
MMP8	2.05938	1.52891	2.7739	5.77708e-05	2.2323e-07	1.997e-06
MALL	1.4799	1.27872	1.71273	8.29311e-07	2.26502e-07	1.45773e-07
TNFRSF10C	1.79747	1.45293	2.22371	1.28012e-06	2.27976e-07	6.63141e-08
SPON2	1.37842	1.2233	1.55322	3.17384e-06	2.28213e-07	1.37353e-07
INPP5A	1.75874	1.4362	2.1537	1.31201e-06	2.37418e-07	4.70436e-08
CMKLR1	1.38419	1.2268	1.56178	4.14e-06	2.40022e-07	1.29853e-07
MRO	1.34582	1.19925	1.5103	6.22444e-06	2.46227e-07	4.45598e-07
SPINT2	0.203422	0.109876	0.376611	1.02417e-06	2.68666e-07	4.03225e-07
ELF3	1.53498	1.30085	1.81124	1.29396e-06	2.72228e-07	3.87663e-07
NCKAP1	1.5135	1.27814	1.7922	0.000100544	2.79385e-07	1.54145e-06
BCL6	2.85632	1.90967	4.27223	5.42399e-06	2.79766e-07	3.23204e-07
CYP4F3	1.32048	1.17899	1.47894	3.70668e-05	2.83714e-07	1.52812e-06
MYO5C	1.36508	1.20686	1.54405	2.2927e-05	3.03975e-07	7.37174e-07
CECR6	1.94834	1.50178	2.52767	7.8791e-08	3.12492e-07	5.12279e-07
CHST11	3.11081	2.03041	4.76609	2.70489e-07	3.37199e-07	1.85263e-07
RNASE3	1.83141	1.46206	2.29407	1.77055e-06	3.4179e-07	1.40019e-07
HS3ST3B1	1.40035	1.23609	1.58642	2.46389e-06	3.5109e-07	1.22514e-07
AXL	0.584105	0.471811	0.723126	4.18407e-05	3.51819e-07	7.9784e-07
JPH4	0.505219	0.397588	0.641985	1.85032e-06	3.54227e-07	2.32748e-08
BTN2A2	0.222826	0.125968	0.39416	1.0406e-06	3.74081e-07	2.48028e-07
LOC100288911	0.634621	0.533688	0.754644	8.09641e-07	3.97635e-07	2.67157e-07
FAM83E	1.59236	1.32584	1.91245	4.40241e-06	4.11452e-07	6.42534e-07
LILRB2	2.78161	1.88373	4.10745	1.11979e-06	4.11783e-07	2.68574e-07
MFSD6L	1.49338	1.27138	1.75414	8.82243e-06	4.12056e-07	1.03914e-06
GPA33	0.614645	0.507846	0.743905	4.75144e-06	4.1256e-07	5.79624e-07
DDHD1	0.474765	0.356081	0.633006	1.52378e-06	4.49201e-07	3.86321e-07
EPB41L4A	0.607591	0.49878	0.740141	6.56528e-06	4.49953e-07	7.47291e-07
RAB3D	1.72136	1.39181	2.12894	8.20726e-07	4.50662e-07	5.46877e-07
PLA2G16	0.41385	0.293643	0.583265	4.60594e-06	4.6608e-07	4.67198e-07
AKT3	0.418807	0.29772	0.589143	9.98956e-07	4.89238e-07	5.77216e-07
CKB	1.61498	1.33736	1.95023	1.24094e-06	4.90204e-07	6.34145e-07
AES	0.185569	0.098648	0.349078	9.35242e-07	4.99723e-07	1.74589e-07
BASP1	1.96381	1.51278	2.54931	1.18268e-06	5.01641e-07	3.99429e-07
SFN	1.42139	1.2346	1.63644	8.17564e-06	5.41478e-07	9.9878e-07
B3GNT3	1.40254	1.22475	1.60613	1.56345e-05	5.53673e-07	1.00022e-06
CLDN4	1.40591	1.22978	1.60727	7.98835e-07	5.74107e-07	6.08031e-07
ANXA8L2	1.55077	1.30792	1.83871	1.07581e-06	5.8678e-07	4.4362e-07
PELI1	2.42205	1.71139	3.4278	2.78227e-06	5.89096e-07	5.97039e-07
CTSF	0.35759	0.239101	0.534798	3.33362e-06	5.91175e-07	5.51131e-07
MS4A6E	1.45231	1.25833	1.6762	7.23281e-06	5.95113e-07	3.37481e-07
EPHA4	1.61491	1.33423	1.95465	1.06034e-05	5.96529e-07	8.65457e-07
SDCCAG3	7.41277	3.4434	15.9578	9.82405e-08	6.10793e-07	3.04538e-07
RGL4	1.32543	1.18928	1.47717	2.64019e-06	6.26142e-07	3.49603e-07
CD5L	0.703827	0.611453	0.810155	3.58833e-05	6.34115e-07	9.9409e-07
LOC729799	2.51171	1.74546	3.61435	4.40486e-06	6.55748e-07	7.06082e-07
SPNS2	1.98455	1.51826	2.59405	1.89321e-06	6.66493e-07	5.28469e-07
DENND3	2.64476	1.80758	3.86968	2.37334e-06	6.69625e-07	5.48397e-07
CD300E	1.97747	1.51704	2.57764	4.83273e-06	6.97094e-07	4.61421e-07
MME	0.667843	0.570147	0.782279	1.76958e-05	7.02174e-07	5.64953e-07
GRAMD1C	1.59294	1.31543	1.92899	6.67264e-06	7.43235e-07	1.86878e-06
BCL3	2.09734	1.55851	2.82246	9.749e-07	7.66901e-07	1.01423e-06
TMEM98	1.22709	1.1296	1.33298	5.43949e-05	7.68431e-07	1.26297e-06
F13A1	1.62508	1.34368	1.96541	1.66714e-06	7.80716e-07	5.58853e-07
PI3	1.4139	1.23146	1.62336	1.74017e-06	7.87664e-07	8.93324e-07
SLC7A1	2.1091	1.58619	2.8044	1.35555e-06	7.92525e-07	2.84552e-07
IL18R1	1.47805	1.26436	1.72787	2.65527e-06	7.99637e-07	9.3967e-07
ANXA3	1.73982	1.40812	2.14965	3.60649e-07	8.04609e-07	2.87862e-07
CLIC6	1.4366	1.23831	1.66663	8.89285e-06	8.16808e-07	1.7479e-06
LY86	0.416069	0.291269	0.594343	6.01684e-06	8.19952e-07	1.43829e-06
C17orf108	0.289458	0.17596	0.476165	2.18374e-06	8.23191e-07	1.0521e-06
LHFPL2	3.11454	2.04695	4.73894	4.46864e-07	8.37803e-07	1.12668e-07
ACPP	1.60138	1.32895	1.92964	7.22501e-06	8.4398e-07	7.45292e-07
LOC400043	0.656096	0.552926	0.778516	4.28463e-06	8.7318e-07	1.37766e-06
PLK3	3.06433	1.96215	4.78562	8.34684e-07	9.22968e-07	8.50148e-07
C6orf154	1.61552	1.32814	1.96509	6.28312e-06	9.32082e-07	1.59138e-06
ARHGAP6	0.63343	0.525434	0.763623	2.03532e-05	1.01069e-06	1.68743e-06
SFTPC	1.41095	1.22809	1.62104	1.53184e-06	1.01641e-06	1.16708e-06
IGFBP7	2.24033	1.6125	3.11261	1.82591e-06	1.02475e-06	1.52662e-06
NOV	1.6191	1.3381	1.95911	7.05721e-07	1.03299e-06	7.24477e-07
GPRC5A	1.415	1.22488	1.63462	1.7127e-05	1.037e-06	2.41295e-06
SUSD2	1.3811	1.21252	1.57311	8.37227e-06	1.03953e-06	1.16644e-06
TUBB3	1.28969	1.16737	1.42482	5.15684e-06	1.04227e-06	5.61777e-07
SFTPA2	1.7966	1.41715	2.27765	6.25628e-06	1.06013e-06	1.29692e-06
RPS6KA5	0.306841	0.190994	0.492956	2.44141e-06	1.09451e-06	1.03842e-06
PAK1	4.07323	2.34644	7.07082	1.15502e-06	1.12506e-06	6.01163e-07
NIPAL4	1.36579	1.20284	1.55081	4.14794e-05	1.13585e-06	1.51641e-06
PDCD5	9.8063	3.90243	24.6419	6.38987e-07	1.15935e-06	1.19643e-06
CYTL1	1.76778	1.40655	2.22178	4.00128e-07	1.18855e-06	1.03405e-06
SYNJ2	1.37353	1.20684	1.56324	1.04666e-05	1.22413e-06	1.52346e-06
PRSS23	1.49609	1.26791	1.76532	1.09725e-05	1.22668e-06	1.82905e-06
CTTN	1.59674	1.32325	1.92677	1.29799e-06	1.29862e-06	1.0509e-06
ASB10	0.487879	0.364656	0.652741	9.83624e-06	1.30255e-06	1.35207e-06
ASB13	0.374053	0.268358	0.521378	1.639e-07	1.37239e-06	6.47844e-09
HK2	0.265625	0.154387	0.457011	5.45805e-06	1.50717e-06	1.68162e-06
MYC	2.31945	1.64579	3.26885	1.74176e-06	1.53148e-06	1.53999e-06
ANKRD58	0.253451	0.147326	0.43602	4.73822e-06	1.53995e-06	7.09479e-07
MYBPH	1.62052	1.32992	1.97461	4.74525e-06	1.5616e-06	1.68735e-06
ADORA3	1.28625	1.16413	1.42117	1.77186e-05	1.57949e-06	7.57637e-07
TMEM154	1.57761	1.31886	1.88711	2.07834e-06	1.58078e-06	6.09665e-07
CSTA	0.296034	0.17875	0.49027	2.02562e-06	1.59152e-06	2.25344e-06
TMEM2	2.84119	1.86152	4.33643	3.07035e-06	1.612e-06	1.296e-06
NPL	2.83485	1.8772	4.28105	1.83695e-06	1.66027e-06	7.25423e-07
C12orf62	0.0748524	0.0258214	0.216986	2.83421e-06	1.66837e-06	1.80902e-06
FJX1	1.78025	1.40883	2.24961	5.94612e-07	1.68034e-06	1.35939e-06
TST	0.318432	0.199982	0.507041	8.83245e-06	1.68104e-06	1.42486e-06
GATA1	1.68426	1.35575	2.09237	1.26466e-05	1.68241e-06	2.48577e-06
POLD3	0.239316	0.133925	0.427645	3.87423e-06	1.68422e-06	1.3791e-06
H3F3B	4.97345	2.62593	9.41961	7.85935e-06	1.73413e-06	8.53716e-07
MUC1	1.44902	1.2468	1.68403	8.15812e-06	1.7399e-06	1.32274e-06
LOC729040	1.23769	1.13136	1.35401	1.51267e-05	1.74887e-06	3.27432e-06
FAM162A	0.172994	0.0839742	0.356381	4.57368e-06	1.77638e-06	1.95603e-06
DDR1	1.83134	1.42662	2.35089	1.97887e-06	1.81411e-06	2.05068e-06
KCNAB1	0.708686	0.613507	0.818631	7.64836e-06	1.83272e-06	2.8741e-06
CNN3	1.36801	1.19543	1.56551	0.000105105	1.84764e-06	5.25603e-06
S1PR1	1.28502	1.15603	1.42839	5.20892e-05	1.86194e-06	3.37626e-06
C16orf89	1.28406	1.15873	1.42295	6.50335e-05	1.8994e-06	1.82892e-06
QPCT	2.55327	1.74181	3.74276	1.37671e-06	1.98049e-06	1.55649e-06
ITGB3	1.50288	1.27118	1.77681	1.50839e-06	1.99689e-06	1.8542e-06
CLEC12A	0.386407	0.260894	0.572302	4.88675e-06	2.00432e-06	2.08674e-06
HRK	1.41001	1.22632	1.62122	1.03377e-05	2.03008e-06	1.40228e-06
GGT5	1.80969	1.42766	2.29395	7.66866e-07	2.03996e-06	9.44632e-07
IFITM2	1.87626	1.44678	2.43323	3.62195e-06	2.08645e-06	2.08717e-06
ABHD14A	0.167463	0.0828372	0.338542	1.84591e-06	2.10931e-06	6.49573e-07
TKTL1	1.57629	1.30809	1.89947	7.69862e-05	2.11859e-06	1.73262e-06
APOBEC3B	1.778	1.40374	2.25206	1.07535e-05	2.16931e-06	1.82156e-06
DOK1	0.145424	0.064505	0.327854	8.00716e-06	2.23611e-06	3.34004e-06
TNFRSF12A	2.45321	1.69767	3.545	1.10836e-06	2.28053e-06	1.77311e-06
DEFA3	1.20053	1.11372	1.29411	2.1857e-05	2.28493e-06	1.81793e-06
EGR3	1.39486	1.21305	1.60392	9.54098e-06	2.2946e-06	3.00518e-06
GPRIN2	1.64038	1.32778	2.02658	3.47854e-05	2.32157e-06	4.4712e-06
VENTX	1.51352	1.28166	1.78733	9.65411e-06	2.38328e-06	1.03445e-06
AQP4	1.26214	1.14306	1.39362	9.13456e-06	2.41676e-06	4.13678e-06
SELM	0.411897	0.286478	0.592225	1.63752e-06	2.44593e-06	1.68752e-06
BCAR3	0.615549	0.502167	0.754532	8.70105e-05	2.44858e-06	2.98897e-06
ECE1	1.46673	1.25981	1.70762	5.79746e-06	2.45657e-06	7.9415e-07
SSTR2	1.21423	1.11714	1.31976	7.5837e-05	2.60973e-06	4.99558e-06
SLPI	1.43383	1.23402	1.66598	1.75227e-06	2.74786e-06	2.52218e-06
LILRA4	2.64285	1.75766	3.97384	1.72155e-06	2.75426e-06	3.01122e-06
IFITM4P	1.86461	1.43626	2.42073	3.32786e-06	2.75514e-06	2.88941e-06
CHKA	1.78529	1.40012	2.27642	1.57202e-05	2.76726e-06	2.95032e-06
CCL3	1.67518	1.34677	2.08366	2.54493e-06	2.81807e-06	3.58651e-06
VMO1	0.668422	0.562918	0.7937	5.77104e-05	2.92484e-06	4.30509e-06
ID1	1.46418	1.246	1.72056	7.44409e-06	2.95423e-06	3.63114e-06
ASPRV1	1.66491	1.36022	2.03786	1.98726e-06	2.97968e-06	7.69091e-07
MPZL2	0.476829	0.350315	0.649033	1.30962e-05	2.98033e-06	2.50363e-06
SPIRE2	0.711234	0.613361	0.824725	0.000231468	3.04706e-06	6.44842e-06
P2RY2	1.69248	1.35727	2.11048	7.87414e-06	3.13735e-06	2.97454e-06
OLIG2	1.88054	1.4297	2.47354	7.07071e-05	3.20914e-06	6.29919e-06
SNHG3	2.23131	1.60776	3.0967	7.82592e-06	3.32519e-06	1.59031e-06
CGNL1	1.48893	1.25534	1.76599	3.07207e-05	3.4344e-06	4.83775e-06
FNIP2	2.13138	1.55967	2.91265	1.10284e-05	3.43633e-06	2.03925e-06
ADORA2A	1.36778	1.19642	1.56368	1.893e-05	3.48776e-06	4.52193e-06
CD163	3.13019	1.95894	5.00173	1.27605e-06	3.5006e-06	1.82556e-06
PREX1	1.64928	1.33114	2.04345	0.000169757	3.5185e-06	4.73884e-06
FAM20C	1.44326	1.2358	1.68556	0.000133147	3.78065e-06	3.59069e-06
CTNNBIP1	0.181574	0.0873305	0.37752	7.57414e-06	3.81761e-06	4.91493e-06
LILRB4	1.9167	1.44878	2.53575	5.82346e-06	3.83193e-06	5.21307e-06
TRPM6	1.45205	1.23126	1.71244	6.10531e-05	3.99152e-06	9.33601e-06
FERMT2	1.39887	1.20893	1.61866	3.70629e-05	4.03385e-06	6.53605e-06
SDS	1.31605	1.17153	1.4784	3.55994e-05	4.05193e-06	3.70215e-06
PPAPDC1B	2.16901	1.55955	3.01663	3.5186e-05	4.06187e-06	4.21696e-06
C20orf46	0.727874	0.634089	0.835531	0.000173749	4.0696e-06	6.38753e-06
CH25H	1.6509	1.33163	2.04673	2.59958e-06	4.12243e-06	4.83636e-06
SLC24A4	0.533695	0.410649	0.69361	2.56757e-05	4.1631e-06	2.65453e-06
MYO1B	1.39864	1.20627	1.62169	0.000153964	4.1794e-06	8.83078e-06
C4BPA	1.65265	1.33354	2.04814	4.42844e-06	4.18748e-06	4.44408e-06
CXCL17	1.3937	1.20656	1.60987	1.12749e-05	4.20642e-06	6.40989e-06
PAPSS2	2.36389	1.6533	3.37988	4.16032e-06	4.2233e-06	2.404e-06
LILRB3	3.00518	1.91716	4.71067	1.12199e-05	4.22705e-06	1.60342e-06
LOC286058	1.68496	1.34087	2.11734	3.43996e-05	4.30345e-06	7.57655e-06
HS3ST2	1.30293	1.16219	1.46071	6.32286e-06	4.34323e-06	5.70166e-06
HHIP	1.56927	1.28482	1.91668	0.000162454	4.36659e-06	1.00478e-05
ME2	4.49321	2.3823	8.47456	7.04675e-06	4.40837e-06	3.4606e-06
CRELD2	7.13925	3.15571	16.1513	3.30958e-06	4.42078e-06	2.37065e-06
CD93	1.66921	1.35633	2.05428	4.23783e-06	4.45162e-06	1.31299e-06
SHC2	1.51255	1.25934	1.81667	0.000100288	4.47125e-06	9.56699e-06
TCEB1	6.29834	2.91111	13.6268	2.87131e-06	4.51888e-06	2.95908e-06
AMIGO2	0.551615	0.428207	0.71059	5.29963e-05	4.6595e-06	4.14025e-06
EHD2	1.26667	1.14375	1.40279	2.73e-05	4.69491e-06	5.65287e-06
KRT83	1.40819	1.21928	1.62637	4.41357e-05	4.75653e-06	3.19998e-06
GPR125	1.63227	1.31337	2.0286	3.1054e-05	4.76966e-06	9.96759e-06
MEF2C	1.41091	1.21324	1.64077	0.000118462	4.82676e-06	7.81955e-06
PRDM8	1.44565	1.23848	1.68747	7.59904e-06	4.88967e-06	3.00756e-06
SHQ1	0.455414	0.326717	0.634806	2.8575e-05	4.99163e-06	3.45358e-06
EMP2	1.67537	1.34131	2.09261	1.21405e-05	5.04403e-06	5.41461e-06
SELENBP1	1.38031	1.19866	1.58949	1.40263e-05	5.06442e-06	7.5729e-06
PLBD1	0.289123	0.169179	0.494103	7.22885e-06	5.19401e-06	5.66664e-06
ASS1	1.30153	1.15993	1.46042	3.75921e-05	5.26058e-06	7.30418e-06
PTGER2	1.33591	1.18307	1.50851	0.000116227	5.26116e-06	2.98584e-06
KRT18	2.04518	1.50514	2.77899	1.03376e-05	5.27397e-06	4.78922e-06
TMEM54	1.72606	1.38475	2.15149	4.47865e-06	5.27447e-06	1.19915e-06
ADARB1	1.602	1.30928	1.96017	1.2185e-05	5.31052e-06	4.70533e-06
MYO6	0.575468	0.453821	0.729722	4.28065e-05	5.3178e-06	5.10411e-06
CHSY1	1.45304	1.23186	1.71393	0.000334403	5.46079e-06	9.20664e-06
RPL22L1	4.52166	2.35714	8.67382	7.29559e-06	5.52608e-06	5.63118e-06
OLFML2B	1.98972	1.47557	2.68302	1.18079e-05	5.61326e-06	6.46543e-06
ODF3L1	0.663927	0.555935	0.792897	4.73854e-05	5.62384e-06	6.12264e-06
C10orf116	1.44296	1.23242	1.68945	6.67903e-06	5.721e-06	5.18637e-06
F2RL1	1.28611	1.15271	1.43495	5.67837e-05	5.75274e-06	6.68464e-06
TMEM158	1.57946	1.30796	1.90732	9.024e-06	5.97232e-06	2.03702e-06
ANKRD22	1.32418	1.17239	1.49562	6.7034e-05	6.11813e-06	6.17115e-06
DEXI	2.26968	1.59344	3.23292	1.61838e-05	6.34394e-06	5.59107e-06
LOC100131283	1.25522	1.13035	1.39389	0.000579356	6.35229e-06	2.12156e-05
ENAH	1.6517	1.31683	2.07173	0.00012286	6.38083e-06	1.41958e-05
FBXO8	0.225131	0.119468	0.424247	6.25229e-06	6.40742e-06	3.98433e-06
ASGR2	1.42026	1.22313	1.64916	8.41109e-05	6.45144e-06	4.18943e-06
BRD4	2.32809	1.66136	3.26238	5.55997e-05	6.46039e-06	9.165e-07
LOC100131043	1.45456	1.23624	1.71144	3.07428e-05	6.56435e-06	6.30809e-06
RBPMS	1.6223	1.30663	2.01424	0.000120895	6.76109e-06	1.17392e-05
OLIG1	1.37064	1.1982	1.56789	5.13204e-06	6.77551e-06	4.30874e-06
PHC2	2.83718	1.79737	4.47855	1.6831e-05	6.8816e-06	7.55573e-06
TMEM30B	1.4814	1.23818	1.7724	0.000111812	7.17528e-06	1.74883e-05
LGMN	1.39248	1.21485	1.59609	2.19511e-05	7.19287e-06	1.98346e-06
NINJ1	1.84833	1.41245	2.41872	1.97945e-05	7.20921e-06	7.58762e-06
ITGB4	1.29896	1.1556	1.46011	9.15291e-05	7.22674e-06	1.16657e-05
SAP30	2.21364	1.55818	3.14484	1.8551e-05	7.32112e-06	9.17927e-06
DNAJB11	4.6575	2.41106	8.99698	1.35759e-05	7.34275e-06	4.65519e-06
MMP24	1.4869	1.24739	1.7724	2.56723e-05	7.36911e-06	9.56567e-06
CCL4	1.49411	1.25537	1.77825	4.34284e-05	7.51597e-06	6.17316e-06
FLNB	1.73315	1.37085	2.19121	8.15119e-05	7.55588e-06	4.30249e-06
PAWR	1.27026	1.14182	1.41315	0.000160406	7.61499e-06	1.09088e-05
CMTM2	1.53685	1.27765	1.84863	1.01269e-05	7.66533e-06	5.11832e-06
GALM	2.59071	1.69804	3.95265	1.44939e-05	7.7261e-06	1.00343e-05
ARID5B	1.60999	1.30574	1.98513	1.33495e-05	8.02795e-06	8.34157e-06
VSTM2L	1.23537	1.1191	1.36372	0.000654735	8.10264e-06	2.77698e-05
UPB1	1.57257	1.28658	1.92213	2.7726e-05	8.13483e-06	9.84467e-06
IFNAR1	4.46022	2.33413	8.52292	6.72091e-06	8.16635e-06	6.02526e-06
ZNF226	0.167671	0.0766743	0.366661	4.78061e-06	8.38782e-06	7.70472e-06
FDFT1	0.40574	0.272241	0.604702	1.29757e-05	8.41738e-06	9.39056e-06
EFNB1	0.442404	0.308632	0.634157	5.02442e-05	8.47313e-06	9.03207e-06
FCAR	1.52645	1.26481	1.84222	8.55451e-06	8.49589e-06	1.03959e-05
TNFRSF8	1.53151	1.2685	1.84905	0.0001491	8.58251e-06	9.25124e-06
C8B	0.787983	0.709163	0.875563	0.000102666	8.77627e-06	9.36697e-06
IFT20	0.30754	0.183574	0.515219	9.9104e-06	8.78185e-06	7.50017e-06
LOC388780	1.4421	1.22515	1.69747	1.7939e-05	8.88079e-06	1.07681e-05
BATF	1.71432	1.34726	2.18139	2.60578e-05	9.07832e-06	1.16207e-05
ABHD5	0.442263	0.309731	0.631506	7.05985e-05	9.16222e-06	7.1517e-06
PTPRE	2.01275	1.49344	2.71263	1.53488e-05	9.43026e-06	4.34373e-06
SLC7A11	1.51141	1.25665	1.81783	2.18468e-05	9.61472e-06	1.15708e-05
FAM65B	1.46886	1.24748	1.72953	2.51006e-05	9.64967e-06	3.97018e-06
HIC1	1.67394	1.32867	2.10893	2.01371e-05	9.69508e-06	1.23606e-05
C17orf76	0.576047	0.459552	0.722074	1.50342e-05	9.72593e-06	1.71234e-06
TNFRSF10D	2.85645	1.78833	4.56251	1.14028e-05	9.83446e-06	1.11885e-05
ACOT11	2.34387	1.63008	3.37022	1.17424e-05	9.92691e-06	4.28632e-06
RGS2	1.49086	1.25103	1.77667	4.23735e-05	1.01e-05	8.08794e-06
FBXO25	0.0866422	0.0290592	0.25833	8.87876e-06	1.01395e-05	1.14236e-05
ACO1	0.61453	0.49214	0.767357	0.00034269	1.04756e-05	1.73257e-05
KRT14	1.31048	1.15882	1.482	5.90256e-05	1.07051e-05	1.64149e-05
MYB	0.542501	0.413643	0.711502	2.91917e-05	1.07315e-05	9.87061e-06
C6orf192	1.65928	1.32292	2.08115	5.68435e-05	1.09264e-05	1.18069e-05
HPGDS	0.600195	0.47835	0.753077	4.61043e-05	1.09269e-05	1.03625e-05
TMCO2	0.67334	0.564229	0.803551	0.000117772	1.11398e-05	1.16132e-05
RTN1	0.51471	0.384205	0.689544	4.40013e-05	1.13993e-05	8.53103e-06
FAM40B	1.24407	1.12624	1.37424	0.000321587	1.16853e-05	1.69669e-05
TIMP4	1.51554	1.2607	1.82189	5.89385e-06	1.16901e-05	9.58708e-06
MREG	1.88912	1.42964	2.49628	1.1011e-05	1.18846e-05	7.68907e-06
AQP9	3.35439	1.96445	5.72777	8.32102e-06	1.20263e-05	9.2783e-06
KLK6	1.89293	1.41672	2.52921	2.07995e-05	1.21222e-05	1.58867e-05
NOL3	1.92709	1.43763	2.58321	8.86825e-06	1.21297e-05	1.14418e-05
CCR3	1.39438	1.20041	1.61969	1.31754e-05	1.21556e-05	1.36051e-05
CLDN3	1.2886	1.149	1.44517	3.68264e-05	1.21675e-05	1.46422e-05
GAL3ST4	1.73971	1.35821	2.22837	7.89041e-06	1.22844e-05	1.16519e-05
METTL1	3.2259	1.92973	5.3927	5.70551e-06	1.25925e-05	7.91518e-06
CRYBB1	1.39816	1.20376	1.62396	0.000125419	1.26213e-05	1.14466e-05
PSMG2	0.229717	0.118358	0.44585	1.38448e-05	1.27461e-05	1.3775e-05
SEMA3B	1.56462	1.27955	1.91321	0.000139832	1.27496e-05	1.28819e-05
CELA2B	0.689041	0.58206	0.815684	2.85332e-05	1.2794e-05	1.51494e-05
MYO1D	1.52321	1.25857	1.84349	1.62666e-05	1.2876e-05	1.54737e-05
NOTCH3	1.23652	1.12512	1.35895	0.000354054	1.29513e-05	1.04576e-05
AHNAK2	1.5648	1.28016	1.91274	2.54257e-05	1.2969e-05	1.23665e-05
CCL8	1.27747	1.1432	1.42752	3.1119e-05	1.30163e-05	1.5475e-05
DCUN1D4	0.481791	0.349632	0.663904	3.76333e-05	1.30868e-05	8.04749e-06
SLC17A9	2.29525	1.57623	3.34226	7.53016e-06	1.33038e-05	1.47004e-05
CLCN4	0.608731	0.485527	0.763198	0.000136349	1.33732e-05	1.69173e-05
AMPD3	1.62401	1.31315	2.00845	7.05663e-06	1.36371e-05	7.71096e-06
CPE	0.770348	0.681232	0.871123	0.000609575	1.36768e-05	3.18842e-05
SELL	1.40047	1.20912	1.6221	6.72283e-05	1.37097e-05	7.01058e-06
PRR7	1.81423	1.38308	2.3798	0.000115414	1.38374e-05	1.68905e-05
C17orf89	4.63532	2.33318	9.20899	1.89913e-05	1.3969e-05	1.19275e-05
NALCN	0.736805	0.640001	0.84825	1.64764e-05	1.45479e-05	2.1369e-05
ODC1	5.87118	2.6625	12.9468	1.80263e-05	1.46108e-05	1.14897e-05
SLC46A3	0.501117	0.366825	0.684571	3.12695e-05	1.48858e-05	1.41871e-05
ICAM1	2.08281	1.49246	2.90667	2.65584e-05	1.49457e-05	1.59789e-05
SEC14L1	2.85601	1.81476	4.49471	3.2431e-05	1.51475e-05	5.74066e-06
FAM89A	0.567981	0.437856	0.736777	0.000383642	1.51491e-05	2.03565e-05
PPP2R3A	0.639267	0.52167	0.783373	0.000151234	1.51731e-05	1.6043e-05
SULF2	1.47724	1.24226	1.75666	7.96606e-05	1.52093e-05	1.01359e-05
SYPL2	1.40226	1.19811	1.64119	0.000123541	1.53308e-05	2.53687e-05
MMP7	1.29051	1.14975	1.44851	3.35391e-05	1.55138e-05	1.50475e-05
TMEM71	1.71758	1.35303	2.18035	6.56524e-05	1.55316e-05	8.83431e-06
VNN3	1.48723	1.23264	1.7944	0.000228633	1.56648e-05	3.42285e-05
DLGAP3	1.4415	1.22269	1.69946	0.000301612	1.57748e-05	1.339e-05
TNFRSF11A	1.28681	1.14546	1.44561	0.000367065	1.59965e-05	2.16158e-05
FFAR3	1.36694	1.18593	1.57558	1.51072e-05	1.62319e-05	1.61167e-05
MYO7A	1.60349	1.29698	1.98243	1.68152e-05	1.6301e-05	1.28637e-05
IL1A	0.538996	0.406583	0.714534	3.70307e-05	1.67712e-05	1.73309e-05
BPI	1.36202	1.17656	1.57671	0.000441984	1.67832e-05	3.51487e-05
PTPRF	1.3905	1.19743	1.61469	1.87809e-05	1.67909e-05	1.5429e-05
TRPC6	0.436094	0.300255	0.633389	7.53232e-05	1.72389e-05	1.31175e-05
IL1RL1	1.32611	1.16294	1.51217	0.000258392	1.72856e-05	2.51747e-05
CDKL1	0.377453	0.244261	0.583272	8.59589e-05	1.73344e-05	1.14496e-05
PID1	1.52731	1.2654	1.84342	1.14197e-05	1.76325e-05	1.02189e-05
G0S2	1.37807	1.18869	1.59764	2.25162e-05	1.7755e-05	2.12368e-05
HES4	1.48707	1.24756	1.77257	2.7769e-05	1.78317e-05	9.49034e-06
FOLR3	0.611496	0.493733	0.757348	2.69943e-06	1.78982e-05	6.59109e-06
VAV3	2.47263	1.64695	3.71227	2.83775e-05	1.82511e-05	1.26321e-05
SRBD1	0.374989	0.239546	0.587014	4.85995e-05	1.83586e-05	1.78896e-05
MAF	3.24739	1.88355	5.59875	7.67395e-06	1.83994e-05	2.25252e-05
TTYH3	1.35694	1.18068	1.55951	0.000423174	1.85746e-05	1.71187e-05
ST6GALNAC6	0.358811	0.223736	0.575436	6.74233e-05	1.88543e-05	2.1081e-05
NGEF	1.39269	1.19056	1.62914	0.000108485	1.92054e-05	3.4722e-05
CLDN18	1.33238	1.16488	1.52397	5.72123e-05	1.93136e-05	2.83398e-05
MRPL49	0.1609	0.0703685	0.367905	1.6515e-05	1.93567e-05	1.49342e-05
GTF3C6	3.63966	2.06149	6.42598	8.06381e-05	1.93567e-05	8.41872e-06
MPO	1.26602	1.13745	1.40913	0.000257258	1.95784e-05	1.58233e-05
C9orf152	1.42648	1.20534	1.6882	0.000218603	1.98443e-05	3.58208e-05
CYBA	0.141434	0.0582194	0.343588	3.26143e-05	2.00373e-05	1.56785e-05
GPRC5C	1.88891	1.40325	2.54265	7.13268e-05	2.01051e-05	2.73901e-05
FBXO10	0.477501	0.338797	0.672991	0.000179091	2.05873e-05	2.42333e-05
FHOD1	3.99266	2.11771	7.52764	5.1298e-06	2.07702e-05	1.87638e-05
HEATR5B	0.370553	0.234525	0.58548	3.83328e-05	2.08701e-05	2.10313e-05
ABCG2	0.667232	0.551564	0.807157	0.00042243	2.10037e-05	3.10614e-05
SH3BP4	0.677304	0.566125	0.810317	0.000100183	2.17327e-05	2.05294e-05
FZD2	2.34189	1.58322	3.4641	1.20907e-05	2.17361e-05	2.04274e-05
BNIPL	1.42146	1.20504	1.67675	0.000186095	2.18221e-05	3.00482e-05
QPRT	0.391086	0.253312	0.603796	0.0001217	2.18991e-05	2.26752e-05
TRIM21	0.382462	0.247254	0.591606	6.09311e-05	2.19181e-05	1.57104e-05
SPINK1	1.42083	1.20708	1.67242	1.54682e-05	2.1994e-05	2.41608e-05
PDZK1IP1	1.21674	1.1092	1.3347	0.000151608	2.22709e-05	3.25203e-05
S1PR2	2.60026	1.66378	4.06386	2.46994e-05	2.23403e-05	2.7338e-05
SGPP2	1.44883	1.21689	1.72497	0.000172035	2.24839e-05	3.10848e-05
CC2D2A	0.623538	0.500797	0.776362	0.000162164	2.26204e-05	2.40774e-05
ST6GALNAC1	1.45525	1.22025	1.73549	8.15915e-05	2.28573e-05	2.9764e-05
DNAJB5	1.74138	1.354	2.2396	8.94507e-05	2.30572e-05	1.55565e-05
ECSCR	0.741076	0.640871	0.856948	0.000696698	2.30629e-05	5.28268e-05
PLIN5	1.39638	1.19192	1.63591	0.000124664	2.3145e-05	3.57238e-05
ECM1	1.69849	1.32601	2.17559	1.39089e-05	2.31474e-05	2.741e-05
ACSM3	0.605736	0.480213	0.76407	3.73072e-05	2.35744e-05	2.32423e-05
LY6E	0.509885	0.374039	0.695069	6.36518e-05	2.37095e-05	2.03496e-05
SNAI2	0.601068	0.473167	0.763542	4.17087e-05	2.40095e-05	3.04599e-05
LAPTM4B	2.11038	1.51596	2.9379	7.82566e-07	2.41994e-05	9.65221e-06
C20orf106	1.66476	1.31763	2.10335	0.00022678	2.43216e-05	1.93881e-05
ZBTB33	0.388775	0.249289	0.606309	3.34023e-05	2.43565e-05	3.08886e-05
C19orf21	1.44148	1.21174	1.71478	0.000233143	2.54163e-05	3.65621e-05
SLC16A1	1.38653	1.19968	1.60248	0.000163343	2.58891e-05	9.64143e-06
CCL3L3	1.53717	1.25726	1.87939	2.1927e-05	2.68834e-05	2.76213e-05
ABLIM3	1.46791	1.22615	1.75733	0.000171953	2.71258e-05	2.90923e-05
PEX11A	0.494026	0.357376	0.682926	7.42306e-05	2.7643e-05	1.96887e-05
RIC8B	0.612221	0.487599	0.768693	0.000232544	2.79248e-05	2.38588e-05
LRP8	1.69612	1.34323	2.14174	8.87025e-05	2.79715e-05	9.02971e-06
SLC7A2	1.55917	1.25434	1.93808	0.000300114	2.82431e-05	6.29255e-05
SLC39A8	1.4423	1.218	1.7079	0.000270039	2.83655e-05	2.16924e-05
KCNS3	1.60549	1.28079	2.01251	7.72606e-05	2.91429e-05	4.01494e-05
PEBP1	0.238271	0.122565	0.463205	0.000114099	3.00049e-05	2.34745e-05
DACH1	1.23945	1.11952	1.37224	0.000118528	3.01013e-05	3.56215e-05
TMEM45B	1.21033	1.10798	1.32215	0.000196827	3.02149e-05	2.29236e-05
ZNF365	0.730258	0.629189	0.847563	0.00045509	3.02335e-05	3.53398e-05
LMO3	1.5334	1.24453	1.88932	0.000284393	3.02635e-05	5.96847e-05
PRCD	0.539518	0.401412	0.725139	0.000136857	3.04714e-05	4.30803e-05
NRAS	4.0225	2.10007	7.70475	2.05108e-05	3.06666e-05	2.69905e-05
COL18A1	1.27171	1.13277	1.42768	0.000242539	3.07221e-05	4.66125e-05
NFKBIA	2.37244	1.57242	3.57949	5.71869e-05	3.11211e-05	3.84177e-05
WDR70	0.193204	0.088711	0.420779	2.99776e-05	3.12137e-05	3.47726e-05
SOD2	2.01846	1.45071	2.80841	0.00010011	3.14677e-05	3.07534e-05
PLD6	1.83634	1.38459	2.4355	6.64613e-06	3.19737e-05	2.45855e-05
SLC25A23	1.4454	1.2132	1.72206	4.99946e-05	3.21583e-05	3.74321e-05
C1orf116	1.31792	1.15279	1.50672	0.000253864	3.24475e-05	5.3103e-05
SLC40A1	1.50092	1.23809	1.81954	3.03502e-05	3.25139e-05	3.55933e-05
KIAA0247	4.55742	2.27226	9.1407	3.46923e-05	3.25468e-05	1.94278e-05
MARCKSL1	1.52172	1.24547	1.85923	1.62387e-05	3.27379e-05	3.99691e-05
OSM	1.7326	1.33347	2.2512	4.26114e-05	3.30259e-05	3.8867e-05
SLC1A3	1.65521	1.30592	2.09791	6.03902e-05	3.3101e-05	3.08484e-05
TUSC3	1.49181	1.22722	1.81345	0.000245627	3.35366e-05	5.93332e-05
REM2	1.31818	1.1564	1.5026	0.000128398	3.41005e-05	3.5494e-05
HSD11B1L	0.530396	0.39153	0.718514	0.000133984	3.42094e-05	4.23411e-05
FIG4	0.412081	0.272478	0.623209	6.79953e-05	3.4391e-05	2.66358e-05
MEX3A	1.37055	1.17327	1.60101	0.000399714	3.44365e-05	7.03569e-05
IL1RN	2.08556	1.47505	2.94874	2.61109e-05	3.4441e-05	3.18835e-05
ZNF324B	0.27614	0.150738	0.505867	9.12911e-05	3.60889e-05	3.09483e-05
COL9A2	0.583523	0.450769	0.755374	6.51743e-05	3.6095e-05	4.31185e-05
ITGAL	0.367545	0.228851	0.590294	4.86942e-05	3.66307e-05	3.46292e-05
ITGAX	2.42429	1.58764	3.70185	4.39448e-05	3.66572e-05	4.12612e-05
SNN	1.7949	1.36623	2.35807	0.00023846	3.67204e-05	2.6555e-05
NUAK1	1.56042	1.26068	1.93141	0.000219806	3.67539e-05	4.34004e-05
PEX19	0.27081	0.14598	0.502382	5.74997e-05	3.67774e-05	3.42233e-05
LOC606724	1.48449	1.23087	1.79036	8.78529e-05	3.70818e-05	3.58038e-05
VCL	2.06056	1.45767	2.91282	9.13892e-05	3.71268e-05	4.24495e-05
RHBDF1	1.36928	1.17603	1.59429	0.000440589	3.74793e-05	5.14793e-05
PKP3	1.25388	1.12318	1.39977	0.000270702	3.76695e-05	5.61426e-05
ICOS	0.649879	0.530089	0.796738	0.000106456	3.77193e-05	3.38501e-05
WIF1	1.36369	1.17098	1.58811	0.000370027	3.78556e-05	6.59019e-05
IGSF6	1.43073	1.21089	1.69047	0.00043091	3.79952e-05	2.575e-05
CREM	2.17737	1.50942	3.14091	6.42487e-05	3.83047e-05	3.14918e-05
DUOX1	1.39493	1.18577	1.64098	0.000149044	3.83696e-05	5.92461e-05
PERP	1.47761	1.22719	1.77913	2.52062e-05	3.85088e-05	3.77625e-05
GOLGA7B	1.23294	1.11709	1.36081	0.00037497	3.86945e-05	3.19347e-05
LIPH	1.26971	1.12988	1.42684	0.000175602	3.88415e-05	6.04077e-05
TEX14	0.684593	0.572801	0.818203	0.00027569	3.88524e-05	3.10348e-05
ETV5	1.65541	1.29626	2.11407	6.11462e-05	3.93663e-05	5.35731e-05
IGLL1	1.33435	1.16362	1.53013	0.00014696	3.95938e-05	3.63787e-05
SDF2L1	5.29175	2.42399	11.5523	2.37961e-05	3.97999e-05	2.88035e-05
PHF19	2.68468	1.67931	4.29195	3.66693e-05	3.98703e-05	3.69985e-05
TM4SF19	1.49375	1.23951	1.80013	3.45584e-05	4.03184e-05	2.49186e-05
IGBP1	0.178983	0.0786639	0.407236	3.50051e-05	4.05452e-05	4.10067e-05
SUMF1	0.227299	0.11279	0.458063	7.05613e-05	4.07249e-05	3.41733e-05
CORO2A	0.435606	0.293581	0.646337	0.000135947	4.10837e-05	3.66247e-05
FAM27A	1.44426	1.21351	1.71889	0.000582687	4.11295e-05	3.4927e-05
FKBP3	2.9955	1.78566	5.02505	0.000177621	4.11348e-05	3.23028e-05
CNKSR1	1.63767	1.29158	2.07652	6.30631e-05	4.14123e-05	4.65663e-05
TRIM35	0.282855	0.155403	0.514836	8.51399e-05	4.15335e-05	3.58647e-05
SVIL	0.521982	0.382322	0.712659	0.000142082	4.15882e-05	4.27145e-05
AIP	0.137068	0.0535497	0.350843	2.4718e-05	4.16418e-05	3.40976e-05
MLLT4	0.497454	0.356152	0.694817	5.09756e-05	4.2195e-05	4.20955e-05
ZFP82	0.510352	0.370082	0.703786	0.000282487	4.26208e-05	4.09034e-05
CD177	1.37726	1.18347	1.60278	0.00013325	4.39838e-05	3.51584e-05
RHOF	1.55055	1.25998	1.90811	7.33398e-05	4.43446e-05	3.43194e-05
TRIB1	2.87373	1.72955	4.77485	6.64361e-05	4.56952e-05	4.60634e-05
TSEN2	0.397452	0.254307	0.621172	0.000111165	4.56971e-05	5.12381e-05
SLC9A9	1.30109	1.15374	1.46726	7.21703e-05	4.61303e-05	1.77053e-05
GHRL	1.69403	1.32608	2.16407	3.6821e-05	4.61781e-05	2.4562e-05
RNASE2	1.75608	1.37701	2.23951	8.02422e-06	4.63519e-05	5.66609e-06
TRMT112	0.190906	0.0862604	0.422502	9.82455e-05	4.69486e-05	4.39627e-05
SCG5	1.37305	1.17493	1.60457	0.000164239	4.70757e-05	6.67058e-05
MMP9	1.32002	1.15449	1.5093	0.000129435	4.72053e-05	4.88078e-05
MGMT	0.454171	0.307856	0.670023	0.000229895	4.85145e-05	6.93748e-05
MAP4K1	0.506619	0.366425	0.700451	3.79231e-05	4.87612e-05	3.89001e-05
SLC44A3	1.45626	1.20755	1.75619	0.000784304	4.88748e-05	8.36476e-05
HIF1A	2.23583	1.53269	3.26154	4.30031e-05	4.90416e-05	2.9597e-05
GABPB2	2.49555	1.65407	3.76512	0.000102581	4.98663e-05	1.31127e-05
MKKS	2.48052	1.62427	3.78815	0.000236815	5.03408e-05	2.60735e-05
TRIM7	1.81452	1.37699	2.39107	8.80285e-06	5.04069e-05	2.31256e-05
CLEC6A	0.688811	0.575902	0.823856	4.15194e-05	5.26995e-05	4.48058e-05
PLXNC1	1.46076	1.21346	1.75846	7.48162e-05	5.29333e-05	6.21637e-05
PARD3	1.2918	1.13848	1.46576	0.00014012	5.3818e-05	7.12553e-05
IL10	1.61076	1.27847	2.0294	3.66322e-05	5.413e-05	5.25394e-05
ZNF571	0.534375	0.393592	0.725516	0.000169247	5.42453e-05	5.90349e-05
MGC16121	1.40444	1.19482	1.65083	0.000163923	5.46106e-05	3.81689e-05
CALR	2.39879	1.58482	3.63083	0.000676325	5.54611e-05	3.51403e-05
ERBB2	1.49623	1.22544	1.82685	0.000237843	5.63215e-05	7.63037e-05
C1orf201	0.633981	0.508048	0.79113	0.000496217	5.64467e-05	5.49132e-05
PCDH12	1.47358	1.2138	1.78897	0.000623578	5.69721e-05	8.92864e-05
MEST	1.57306	1.26109	1.9622	0.000208573	5.72708e-05	5.89708e-05
STX12	0.282015	0.152167	0.522664	7.64023e-05	5.73611e-05	5.79353e-05
GKN2	1.40363	1.18429	1.66361	0.000430808	5.78582e-05	9.19633e-05
LOC257358	1.48777	1.22095	1.8129	0.000331397	5.85123e-05	8.16316e-05
PGA3	1.24297	1.11889	1.38081	0.000241601	5.94992e-05	5.04274e-05
TTR	1.44065	1.19718	1.73364	0.000474572	5.95028e-05	0.000110918
DAPK2	1.29059	1.14163	1.459	0.000155811	5.96691e-05	4.5678e-05
CHST2	1.4391	1.21267	1.7078	0.000102517	5.98162e-05	3.07793e-05
KLF8	0.453509	0.307712	0.668387	0.000124348	5.98806e-05	6.44436e-05
ABCC2	2.4076	1.56795	3.69689	6.30294e-05	6.14194e-05	5.93208e-05
PRODH	1.44127	1.20524	1.72353	0.000447862	6.18735e-05	6.18195e-05
TMEM107	0.169321	0.070407	0.407199	7.54215e-05	6.28596e-05	7.28683e-05
EIF2B3	0.285254	0.155465	0.523397	0.000196904	6.383e-05	5.10944e-05
TBC1D10A	0.241338	0.120813	0.482102	6.3467e-05	6.39642e-05	5.66012e-05
FBXL13	1.6452	1.28892	2.09996	0.000148377	6.42609e-05	6.38146e-05
MPP1	3.87416	2.04493	7.33968	3.21519e-05	6.46071e-05	3.26315e-05
KCTD9	1.63023	1.29028	2.05975	0.00026174	6.48563e-05	4.20609e-05
RGNEF	0.741673	0.640446	0.8589	0.000601583	6.52669e-05	6.56558e-05
HM13	2.69804	1.66172	4.38064	5.80849e-05	6.63063e-05	5.97805e-05
AFAP1L1	1.38857	1.18298	1.62987	6.58253e-05	6.75552e-05	5.93288e-05
DUSP5	1.99343	1.4155	2.8073	6.85347e-05	6.89893e-05	7.84054e-05
LOC730102	0.612352	0.479425	0.782135	0.000351501	6.90241e-05	8.56549e-05
LOC100129363	1.53244	1.23483	1.90179	0.000521535	6.93926e-05	0.000106811
MCTP2	1.34308	1.15702	1.55905	0.000584937	7.00408e-05	0.000105733
VTCN1	1.5386	1.23799	1.91222	0.000516929	7.01018e-05	0.000102424
DUT	0.248969	0.12598	0.492025	0.000107588	7.01687e-05	6.31914e-05
LOC100129387	1.27383	1.13254	1.43275	0.000580101	7.06988e-05	5.46008e-05
AIMP2	2.63834	1.66237	4.1873	0.000159478	7.11097e-05	3.84581e-05
GGCT	3.29485	1.86199	5.83033	0.000149783	7.12638e-05	4.22446e-05
FAM129B	1.96316	1.42124	2.7117	0.000220387	7.16242e-05	4.25963e-05
LOC440335	1.26766	1.12754	1.42519	0.00031366	7.16613e-05	7.2305e-05
EXD2	0.582434	0.448172	0.756918	0.00035388	7.19096e-05	5.27602e-05
ISG20	1.45035	1.20721	1.74245	0.000124002	7.21686e-05	7.14443e-05
MGC4859	0.364331	0.221378	0.599595	0.000187891	7.22726e-05	7.11828e-05
C7orf23	0.372073	0.226847	0.610272	0.000312403	7.23589e-05	8.99886e-05
PLA1A	0.668236	0.550039	0.811832	5.01866e-05	7.31328e-05	4.92893e-05
TNFSF14	1.54714	1.24685	1.91977	0.000116051	7.42567e-05	7.37879e-05
CNR1	2.15659	1.45077	3.20582	0.000886121	7.43959e-05	0.000144953
NPHP1	0.588145	0.451301	0.766483	0.000179648	7.53621e-05	8.56173e-05
PTS	4.64724	2.17767	9.91744	8.10245e-05	7.61576e-05	7.11991e-05
SCARNA2	0.616549	0.486471	0.78141	0.000167287	7.75173e-05	6.3314e-05
LCN2	1.30866	1.14419	1.49677	0.000223076	7.89454e-05	8.64687e-05
ATP2C1	0.463148	0.31706	0.676547	0.000452054	7.91243e-05	6.86398e-05
PECR	0.490092	0.343359	0.699529	0.000154426	7.96638e-05	8.55256e-05
FZD5	2.1127	1.50249	2.97074	4.98423e-05	7.97002e-05	1.69967e-05
LIMCH1	1.46459	1.20901	1.77418	0.000254596	8.01774e-05	9.62382e-05
NTSR1	1.50538	1.22828	1.845	0.000106553	8.11114e-05	8.11631e-05
SERPINF2	0.502599	0.358112	0.705383	7.20104e-05	8.11244e-05	6.94577e-05
CAMP	0.642539	0.514595	0.802295	9.00694e-05	8.11367e-05	9.44943e-05
NPC1	2.73082	1.67361	4.45587	6.17504e-05	8.16117e-05	5.7842e-05
OR5F1	0.581822	0.444289	0.761928	0.000163847	8.1863e-05	8.28452e-05
NT5DC2	1.24563	1.12114	1.38394	0.000289353	8.257e-05	4.34303e-05
SPG21	0.251199	0.139725	0.451609	4.40264e-05	8.34582e-05	3.90899e-06
GAS6	1.22706	1.11002	1.35644	0.000631605	8.39617e-05	6.31412e-05
DHRS9	1.35928	1.1702	1.57891	0.000724184	8.51914e-05	5.90259e-05
FAM157A	1.48099	1.21115	1.81095	0.000636656	8.52736e-05	0.000129896
ECHDC2	0.407237	0.262346	0.632151	0.000139985	8.55428e-05	6.22417e-05
MGC4473	0.512897	0.367017	0.716762	0.000190351	8.57754e-05	9.22078e-05
KLF10	3.49225	1.88796	6.45979	6.19568e-05	8.6183e-05	6.74551e-05
SH2D1B	1.30044	1.13958	1.48402	0.000629959	8.61985e-05	9.64759e-05
EGR1	1.43842	1.20593	1.71573	0.000328616	8.76797e-05	5.30417e-05
CCDC101	0.377272	0.232825	0.611336	0.000109726	8.78905e-05	7.55117e-05
ATP6V1C1	3.19536	1.79463	5.68936	0.000147647	8.81191e-05	7.92141e-05
TPTE	0.66575	0.544199	0.814449	0.000393818	8.89396e-05	7.6419e-05
STX11	0.277411	0.14699	0.523554	0.000101864	8.90085e-05	7.59319e-05
SLC27A3	0.405902	0.259082	0.635925	0.000310325	8.90143e-05	8.28124e-05
DGKD	1.58604	1.26014	1.99623	0.00060669	9.05327e-05	8.48968e-05
C11orf82	0.54306	0.400283	0.736763	0.000249815	9.09437e-05	8.75394e-05
CST6	1.7105	1.3146	2.22562	3.76394e-05	9.16936e-05	6.42894e-05
TRAF5	1.76554	1.33246	2.33938	0.000105341	9.20657e-05	7.52917e-05
CMTM4	1.66426	1.29212	2.14356	0.000161488	9.28379e-05	7.99035e-05
HEY1	1.45695	1.20302	1.76448	0.000355943	9.33481e-05	0.000117348
LRRC70	1.56336	1.24809	1.95826	0.000202841	9.50589e-05	0.000100841
COL1A1	1.2191	1.10205	1.34858	0.000267975	9.50709e-05	0.000119681
OR8G5	1.24928	1.11968	1.39389	0.00040859	9.51141e-05	6.81133e-05
LOC286186	0.598414	0.461425	0.776073	0.000171315	9.54535e-05	0.000108276
PRRG1	0.677711	0.555939	0.826155	0.000426988	9.57614e-05	0.000118227
GLT1D1	1.66518	1.29229	2.14567	0.000193421	9.77729e-05	8.0678e-05
TACC2	1.43383	1.18927	1.72868	0.000688754	9.79437e-05	0.000158906
GGTLC1	1.97044	1.40221	2.76894	0.000171769	9.85398e-05	9.32643e-05
IL1R1	1.21928	1.10464	1.34582	0.00100293	9.86716e-05	8.30891e-05
C5orf4	0.486076	0.340388	0.694119	6.8707e-05	9.91851e-05	7.23217e-05
PDCL	0.532403	0.38976	0.727248	0.000742031	9.94574e-05	7.44721e-05
PLA2G10	1.48237	1.21082	1.81482	0.000278055	0.000100718	0.000137308
MSLN	1.26346	1.12023	1.42502	0.000945529	0.000104098	0.000139404
PTPRK	1.24616	1.11383	1.39421	0.000506028	0.000104471	0.00012192
TNNC1	1.17911	1.08096	1.28618	0.00194783	0.000104702	0.000202742
TANC1	1.53335	1.23364	1.90588	0.000186036	0.000107103	0.000117069
ZNF658	0.478644	0.329769	0.69473	0.000161487	0.000107609	0.000106148
S100A13	0.603912	0.46709	0.780813	0.000810037	0.000108215	0.000119305
BCAT1	2.08127	1.44186	3.00424	8.64182e-05	0.000109218	9.07708e-05
ZNF138	0.613126	0.47907	0.784695	0.000246826	0.000109237	0.000101886
PARK2	0.580059	0.440546	0.763752	0.000203564	0.00010976	0.000104446
SYNPO2L	1.4095	1.17232	1.69466	0.00170204	0.000110746	0.000260997
GOLPH3L	0.265112	0.134195	0.523747	0.000130736	0.0001118	0.000132517
CTSL1	2.3548	1.59203	3.48302	4.21859e-05	0.00011182	1.80053e-05
FBLIM1	1.39301	1.17309	1.65415	0.00042443	0.000111849	0.000156195
MFGE8	1.41496	1.18485	1.68976	0.000107387	0.000114183	0.000126603
IL8	1.36569	1.16908	1.59537	4.80158e-05	0.000114248	8.5079e-05
CRLF1	1.5012	1.22428	1.84077	0.000479761	0.00011447	9.42813e-05
PHYHD1	1.56782	1.23929	1.98344	0.000927586	0.000114636	0.000178131
IFITM1	1.29292	1.13759	1.46947	0.000248541	0.000116519	8.35619e-05
PGLYRP1	1.18607	1.08437	1.29731	0.00194906	0.000116619	0.000190798
NR2F2	1.32707	1.14657	1.53598	0.000851733	0.000116748	0.00014847
FTSJD1	0.346382	0.20304	0.590921	0.000139004	0.00011725	0.000100109
TPD52L2	1.93907	1.4013	2.68323	0.000192444	0.000117279	6.44458e-05
LOC730227	1.64865	1.27424	2.13308	0.000317129	0.000117929	0.000142467
LTF	1.23077	1.10497	1.37089	0.00152372	0.000119203	0.000160426
FHL1	0.496443	0.34835	0.707494	8.54929e-05	0.000119913	0.0001069
SNX8	2.95427	1.70747	5.11151	8.87129e-05	0.000121668	0.000107666
RIMS3	1.37561	1.17305	1.61314	0.00020856	0.000123564	8.71413e-05
WFIKKN2	0.770872	0.674167	0.881448	0.000153486	0.000123648	0.000141768
ICAM2	0.200259	0.0902718	0.444253	5.45648e-05	0.000123788	7.62836e-05
APOL6	0.552195	0.406838	0.749487	0.000163737	0.000124422	0.00013892
CES1	0.690024	0.570874	0.834043	0.000565828	0.000125015	0.000124904
COG5	0.32816	0.186296	0.578053	0.000390591	0.000125104	0.000114621
APOLD1	0.593645	0.454964	0.774598	0.000486732	0.000126454	0.000122306
GYPC	0.368923	0.222104	0.612794	0.000278411	0.000128279	0.000117393
LBR	2.05651	1.43204	2.95329	0.000518696	0.000128795	9.43439e-05
ZMYND15	0.568529	0.424701	0.761064	0.00137078	0.00012904	0.000147791
C5orf44	0.558737	0.418967	0.745135	0.000378628	0.000129365	7.40627e-05
ASAP2	1.51006	1.21952	1.86982	0.000404121	0.000129736	0.000156709
MT1X	1.99724	1.40032	2.84861	0.000382231	0.000129828	0.000134232
CMTM8	1.45081	1.19825	1.7566	0.000345584	0.000130556	0.000137097
UBE2E2	0.459346	0.322796	0.653661	5.65475e-05	0.000131321	1.54575e-05
LAMC2	1.73508	1.3154	2.28866	0.000173025	0.000131594	9.60566e-05
ANKHD1	2.39276	1.56556	3.65702	0.000447068	0.000132841	5.55372e-05
NLN	2.48348	1.57382	3.91893	6.87222e-05	0.000132997	9.28618e-05
FCER2	1.44352	1.19225	1.74775	0.000373417	0.000134053	0.000168493
ZNF439	0.535555	0.388684	0.737923	0.000338536	0.000135908	0.000134376
PHLDA2	1.94766	1.38275	2.74334	6.95126e-05	0.000137277	0.000136606
REEP6	0.436519	0.284584	0.669571	0.000300609	0.000137892	0.000146065
LILRB5	1.53142	1.24321	1.88644	4.82715e-05	0.000139463	6.16565e-05
KLHL21	3.69831	1.88381	7.26054	0.000100042	0.000141488	0.0001447
PARVA	1.64296	1.26494	2.13396	0.000556986	0.0001427	0.000197905
ST6GAL1	1.60631	1.26569	2.03859	0.000348271	0.000143575	9.71132e-05
IQSEC3	0.744	0.647159	0.855332	0.000384792	0.000143694	3.23441e-05
SGPP1	0.574154	0.432472	0.762252	0.000287256	0.000144509	0.000124241
C1orf133	1.5532	1.23177	1.95852	0.000732507	0.000144648	0.000197681
CSF3	1.26407	1.11079	1.43849	0.00322977	0.000146298	0.000380544
FANCD2	0.554668	0.41028	0.749869	0.000284958	0.000148197	0.000127592
DCUN1D3	3.08508	1.72244	5.5257	7.12057e-05	0.000149345	0.00015157
PGC	1.3652	1.15963	1.60721	0.000575243	0.000149414	0.00018508
TTLL11	0.561773	0.41808	0.754852	0.000566296	0.000149476	0.000130359
SERPING1	0.75347	0.654557	0.86733	0.000406677	0.000151198	8.07101e-05
GDF15	1.45304	1.20055	1.75862	0.000160108	0.000152284	0.000124618
BPHL	0.413135	0.262712	0.649687	0.000456684	0.000153299	0.000129685
SLC25A3	10.0302	3.0452	33.0371	0.000121206	0.000153537	0.000150095
FOXI2	0.249715	0.122194	0.510317	0.0002522	0.000154638	0.000141929
TRPM2	1.28132	1.12977	1.45321	0.000919192	0.000154919	0.000113528
CARD10	1.22837	1.10553	1.36485	0.000611884	0.00015598	0.000130074
AOC3	0.744305	0.6391	0.866829	0.000415198	0.000157246	0.000145842
SLC43A1	1.29055	1.13443	1.46816	0.000613689	0.000157621	0.000105621
RORA	0.508736	0.357099	0.724763	0.0002072	0.00015871	0.000182069
FNBP1L	1.38181	1.16675	1.6365	0.00031546	0.000159274	0.000179138
WIPI1	2.91145	1.67923	5.04786	0.000185939	0.000159485	0.000141211
DNAJC5	4.62255	2.08393	10.2537	0.000132751	0.000159691	0.000165664
B3GNT1	0.3899	0.239821	0.633899	0.00016541	0.000160905	0.000145633
DBR1	0.503561	0.355562	0.713165	0.000287261	0.000162046	0.000111632
IGFBP3	1.51706	1.21585	1.8929	0.000655875	0.000164224	0.000223668
FAM110C	1.65957	1.26119	2.18379	0.00192986	0.000164589	0.000298219
LPCAT1	1.70592	1.29736	2.24314	0.000197659	0.000165354	0.000131466
LOC400743	0.6928	0.572603	0.838228	0.000864971	0.000165637	0.000159968
ERN1	1.3736	1.1664	1.61761	0.00057038	0.000165842	0.000141792
SMAD1	0.512981	0.361898	0.727137	0.00038508	0.000166176	0.000176789
PADI2	1.32854	1.15146	1.53285	0.000302185	0.000167395	9.93065e-05
ABL2	2.01622	1.41963	2.86353	0.000356503	0.000167702	8.94714e-05
C1orf21	1.35242	1.15798	1.5795	0.00052157	0.000172462	0.000137756
UCHL1	1.40577	1.17723	1.67868	0.000146487	0.000172996	0.000168303
SPPL2B	0.426316	0.283832	0.640328	0.000132587	0.00017408	3.99591e-05
PTPDC1	0.55644	0.410488	0.754286	0.00105289	0.000174531	0.000158907
CORO1A	1.60346	1.2573	2.04493	0.000454469	0.000177292	0.000141642
PDE6G	0.504958	0.35256	0.723231	0.000201713	0.000177506	0.000193207
SELPLG	0.415633	0.262124	0.659042	0.000399873	0.000178304	0.000189377
RASGRP3	1.70403	1.30186	2.23044	0.000419477	0.000178904	0.000104235
LOC100128607	1.34912	1.151	1.58135	0.00114178	0.000180217	0.000219457
BLMH	3.26991	1.77556	6.02193	0.000106884	0.00018112	0.000143144
RASAL2	0.725272	0.613148	0.857899	0.000874477	0.000181786	0.00017774
DPEP2	0.350797	0.202553	0.607537	0.000269641	0.000181912	0.000185193
PLK1S1	0.31689	0.173642	0.578315	0.000235965	0.000181962	0.000180947
SORL1	2.28462	1.49507	3.49112	0.000280965	0.000182435	0.000134026
BHLHA9	0.536353	0.393695	0.730706	6.65251e-05	0.000182833	7.86017e-05
MEX3C	1.38914	1.1718	1.6468	0.00117083	0.000183092	0.000152957
CAT	0.458157	0.303521	0.691576	0.000283696	0.000183542	0.000202921
LOC644189	0.580822	0.434536	0.776354	0.00217068	0.000186927	0.000242663
OSBPL11	0.356292	0.207202	0.61266	0.000203256	0.000188565	0.000190341
TRIB3	1.37891	1.17012	1.62497	0.00113708	0.000188867	0.000125411
CD300A	1.82037	1.33268	2.48653	0.000262414	0.000191482	0.000166572
ZNF28	0.458537	0.308186	0.682239	0.000282915	0.000191828	0.000120005
CEBPE	1.47326	1.20052	1.80797	0.000383895	0.000192291	0.00020758
STX3	1.36617	1.16359	1.60402	0.00107205	0.000193547	0.000138864
PARP15	0.614495	0.477524	0.790755	0.000158348	0.000196089	0.000153991
TMEM189	3.19844	1.78207	5.74052	0.000259143	0.000199688	9.77525e-05
AUTS2	1.23042	1.10504	1.37003	0.000777985	0.000200107	0.000155908
C1R	1.64987	1.26351	2.15436	0.000311644	0.000200844	0.000234864
CPNE3	0.543095	0.393369	0.74981	0.00113006	0.000200996	0.000207527
PDSS1	1.38902	1.17175	1.64657	0.00193641	0.000201847	0.000152892
CCDC64B	1.28864	1.12572	1.47515	0.000884122	0.000204083	0.000235959
CACNA1G	1.50116	1.21245	1.85864	0.000336712	0.000204303	0.000193326
RRAGB	0.583913	0.43754	0.779254	0.000778705	0.000207451	0.000258267
SFPQ	4.86596	2.13278	11.1017	0.000211539	0.000208065	0.000170087
GSTT1	0.888322	0.832834	0.947507	0.000869516	0.000208603	0.000320107
CYBRD1	1.82128	1.32902	2.49587	0.000341296	0.000211614	0.000192064
DZIP1L	0.621474	0.486438	0.793996	0.000515586	0.000212225	0.000141538
SLC1A1	1.6346	1.25018	2.13721	0.00100575	0.000212905	0.000327779
CAMTA1	0.658617	0.527519	0.822296	0.000790397	0.000214919	0.00022632
ZC4H2	0.558881	0.433859	0.719929	8.57059e-05	0.000216544	6.68615e-06
CYSLTR1	0.50877	0.364087	0.71095	3.78265e-05	0.000219015	7.54883e-05
LOC550643	0.294639	0.153654	0.564985	0.000299689	0.000220663	0.000234326
NT5C3	0.39704	0.244933	0.643608	0.000265021	0.000221781	0.000178292
C5orf13	2.34195	1.493	3.67362	0.00020109	0.000222605	0.000211532
ZNF542	0.518143	0.369708	0.726173	0.000319411	0.000223133	0.00013459
SGTB	1.98895	1.38848	2.84908	0.000249359	0.000225123	0.000176908
FUT10	0.624449	0.486409	0.801662	0.000549004	0.000226442	0.000220435
PTPN7	1.4893	1.20472	1.8411	0.000254926	0.000231074	0.000232038
FLJ38717	0.617178	0.480056	0.793467	0.00020069	0.000231202	0.000166814
GNLY	1.2473	1.11042	1.40104	0.000281501	0.000231495	0.000194469
FGFBP1	1.53067	1.21432	1.92944	0.00110441	0.000232884	0.000313577
DSP	1.37104	1.15669	1.62511	0.000442815	0.00023296	0.000274707
CARD16	0.345193	0.196105	0.607623	0.000303325	0.000234604	0.000227069
OAF	1.15587	1.06928	1.24947	0.00191833	0.000235683	0.000266361
EIF2C2	3.11936	1.71069	5.68801	0.000270928	0.000236155	0.000205908
TLR6	1.23922	1.10413	1.39085	0.00205194	0.000236344	0.000270638
OR2A9P	0.718208	0.601239	0.857933	0.000563506	0.000237727	0.00026287
TBC1D16	2.02391	1.41376	2.89737	9.73262e-05	0.000237772	0.000117375
SLC6A8	1.64127	1.26786	2.12466	0.000273196	0.000238233	0.000168628
KREMEN1	1.92849	1.35653	2.7416	0.00018705	0.00023827	0.000253421
2023-09-04	0.625786	0.493856	0.79296	7.55285e-05	0.000239344	0.000104308
FOXA2	1.42776	1.1788	1.72931	0.000820677	0.000239354	0.000269954
CCL13	1.43767	1.1879	1.73996	7.41719e-05	0.000240194	0.000192704
LOC729041	0.656734	0.52291	0.824806	0.000920357	0.000242644	0.000298465
CDA	1.27393	1.11998	1.44904	0.00101276	0.00024286	0.000229237
NLRP6	1.3479	1.14144	1.59171	0.00203215	0.000243384	0.000432465
CGN	1.33743	1.1437	1.56396	0.00050332	0.000243703	0.000270747
SLC37A3	1.44299	1.18866	1.75174	0.00025824	0.000244942	0.000209729
KDM1A	0.481383	0.327016	0.708618	0.000559142	0.000246961	0.000210613
OMA1	0.36661	0.214207	0.627441	0.000285892	0.000248281	0.000252161
SIK2	0.507363	0.354481	0.72618	0.00053242	0.00024856	0.00020819
MYL9	1.30607	1.13624	1.50129	0.000326007	0.000248792	0.000171955
SMCR7	0.360005	0.21007	0.616955	0.000408371	0.000250517	0.000201439
MYL6B	2.80584	1.62138	4.85559	0.00028742	0.000250987	0.000226835
NECAP2	0.155544	0.0572922	0.422292	0.000421651	0.000255137	0.000260555
C1QBP	8.20995	2.72271	24.7559	0.000235631	0.000255605	0.000185019
C1RL	0.398009	0.243217	0.651316	0.000419588	0.000255871	0.00024619
KIF1B	3.1331	1.6977	5.78214	0.000153866	0.000256094	0.000259272
OAZ2	2.57787	1.56436	4.24801	0.000375579	0.000256633	0.000202529
EDN1	1.76011	1.30144	2.38043	0.00033516	0.000257194	0.000242122
LMO7	1.35249	1.15024	1.59031	0.000643503	0.000257536	0.000258648
BTK	0.296237	0.154297	0.568749	0.000410249	0.000257716	0.000256566
CYP4F2	1.66186	1.24256	2.22266	0.00534598	0.000258238	0.000617341
PTPN9	0.507624	0.355098	0.725663	0.00061015	0.000258751	0.0002002
NET1	0.523879	0.369968	0.74182	0.000352877	0.000264711	0.000269771
SERPINA1	0.523132	0.373512	0.732685	0.000492645	0.000265354	0.000163528
C3orf52	1.41017	1.16736	1.70349	0.00165998	0.000270828	0.000363945
SBNO2	1.90144	1.35817	2.66202	0.000260637	0.000270923	0.000181678
ST6GALNAC3	1.31373	1.13645	1.51865	0.000878415	0.000273094	0.000224729
LOC541471	1.78237	1.30439	2.4355	0.000431077	0.000273341	0.000285386
ITGA3	1.26482	1.11505	1.43471	0.00094973	0.000274228	0.000258664
TTC8	0.582251	0.434659	0.779959	0.00136559	0.000274586	0.000287727
MRC2	1.63975	1.25519	2.14213	0.00021428	0.000278215	0.000286966
FERMT1	1.34253	1.14461	1.57467	0.000870262	0.00027967	0.000294933
BBS2	0.323106	0.175743	0.594036	0.000311491	0.000281376	0.000276658
ANKMY2	0.489605	0.332609	0.720706	0.000753913	0.000284054	0.000294267
FABP3	1.54513	1.23504	1.93308	9.89439e-05	0.000284312	0.000140638
FAM49A	2.68895	1.57483	4.59125	0.000618224	0.000284513	0.000290384
SLC1A4	1.60432	1.25143	2.05672	0.000201946	0.000288276	0.000191822
HLA-DPB2	0.450635	0.293444	0.69203	0.000393183	0.000291071	0.000270603
SERPINB6	0.306988	0.161615	0.583126	0.000506976	0.00029121	0.000309043
C19orf59	0.632139	0.488383	0.818209	0.00361498	0.000292889	0.000493787
MRPL1	0.546239	0.396078	0.753328	0.000371684	0.000294277	0.000226851
VEGFA	1.31584	1.13641	1.52359	0.00083589	0.000297633	0.000242916
DOCK5	1.69312	1.28898	2.22395	0.000345687	0.000298588	0.0001541
TIMM17A	5.1765	2.11829	12.6499	0.000242187	0.000300276	0.000310419
STAC3	0.447467	0.292049	0.685593	0.000184894	0.000301186	0.000220857
KRT80	1.21298	1.08961	1.35033	0.00151184	0.000301431	0.000418653
MARVELD2	1.31803	1.14052	1.52317	0.00100043	0.000302647	0.000182933
C3orf14	0.464396	0.306077	0.704605	0.000590384	0.000302746	0.000310993
CRYL1	0.28669	0.145859	0.563497	0.00048625	0.000304215	0.000290524
ATF5	1.93321	1.35172	2.76483	0.000425349	0.000304778	0.000305183
C11orf35	0.504884	0.346971	0.734666	0.000435218	0.00030624	0.000355427
ZNF385B	1.87939	1.31026	2.69572	0.00395817	0.000306246	0.000607585
C1orf226	1.36322	1.14943	1.61679	0.000716949	0.000306512	0.0003708
KRT17	1.26548	1.11287	1.43902	0.00110658	0.000307044	0.000329454
C15orf38	0.493501	0.338402	0.719684	0.000478788	0.000307652	0.000243712
SLAMF7	1.29791	1.12726	1.49438	0.000550665	0.000308661	0.000288329
TUBA4A	1.35537	1.14776	1.60054	0.000721789	0.000309153	0.000337765
JAK3	1.37364	1.15545	1.63302	0.000548536	0.000309227	0.000321714
ATP13A3	2.01891	1.38206	2.94921	0.000371239	0.000309479	0.000279731
TMEM132A	1.49772	1.20208	1.86608	0.000409505	0.000310721	0.000317665
CCND1	1.53297	1.21585	1.93281	0.000361604	0.000311431	0.000302949
TFAP2C	1.48935	1.19932	1.84952	0.000625475	0.000311592	0.0003125
PLAGL2	1.65993	1.26443	2.17913	0.000802595	0.000312346	0.000262646
EFNA1	1.741	1.29656	2.33778	0.000313234	0.000316225	0.000226925
LY6D	1.34837	1.14198	1.59206	0.00157475	0.000317243	0.000421461
IQCD	1.36715	1.15217	1.62223	0.000659714	0.000317259	0.000339902
CPLX3	0.637584	0.500141	0.812797	0.00027824	0.000318791	0.000279958
DBN1	1.43883	1.18278	1.75031	0.000230465	0.000319962	0.000273732
SLC6A9	1.25103	1.10641	1.41455	0.00157168	0.000320432	0.000352476
HBA2	1.18358	1.07853	1.29886	0.000436467	0.000321185	0.000379176
ADRB1	1.2298	1.0988	1.37642	0.00108227	0.000323722	0.000318993
MYLIP	1.81205	1.31642	2.49429	0.000448091	0.000325549	0.00026618
LOC541472	1.85396	1.31704	2.60975	0.00120361	0.00032855	0.000402406
ENTHD1	1.31279	1.12718	1.52896	0.00131339	0.00032997	0.000466521
LOC100129502	0.627669	0.486596	0.809642	0.000694205	0.00033028	0.000336199
ZNF570	0.425882	0.272453	0.665713	0.000191404	0.000331927	0.000180177
XAGE2B	1.19111	1.08028	1.31331	0.00130586	0.000332089	0.000448807
MRS2	0.467097	0.329652	0.661849	4.28853e-05	0.000333025	1.85981e-05
CLIC3	1.352	1.14786	1.59244	0.000388206	0.000334848	0.000304829
ARHGEF3	0.366619	0.215905	0.62254	0.000748618	0.000336274	0.000203728
IFITM3	1.681	1.26482	2.23411	0.000294061	0.000337514	0.000345357
LOC649201	1.60784	1.24453	2.07721	0.000795389	0.000337984	0.000279193
SHISA4	0.448492	0.295749	0.68012	4.10487e-05	0.000341157	0.000160327
TPPP3	1.35637	1.14641	1.60477	0.000477458	0.000343914	0.000381663
ORM2	1.58508	1.23145	2.04026	0.000590195	0.000344242	0.000348383
F5	1.44151	1.17649	1.76623	0.000952644	0.000344665	0.000418637
ADAMDEC1	1.41242	1.16376	1.71421	0.00132857	0.000344854	0.000474266
TIMP3	1.22617	1.0994	1.36756	0.00110351	0.00034588	0.000250233
ATP10A	0.582211	0.43336	0.78219	0.00080767	0.000346033	0.000329873
PKN2	0.604499	0.461537	0.791745	6.26703e-05	0.000346241	0.000256087
COL5A3	1.26206	1.10633	1.43972	0.00223249	0.000346969	0.000532686
HINT2	0.309133	0.163428	0.584743	0.000440398	0.000348362	0.00030629
HVCN1	0.456108	0.295869	0.703129	0.000556174	0.000351466	0.000378043
EMR1	0.675408	0.549127	0.830731	0.000158109	0.000351597	0.000202421
SLC16A6	1.37123	1.15264	1.63127	0.0021458	0.000351723	0.000366252
CLGN	1.20708	1.0877	1.33957	0.00078781	0.000355401	0.000397047
CLEC5A	1.81583	1.32292	2.4924	4.35436e-05	0.000355923	0.00022267
OLAH	1.23893	1.10196	1.39292	0.00106627	0.000356143	0.000338086
KAL1	0.717994	0.597779	0.862385	0.00288179	0.000357056	0.000394759
REPS2	2.23407	1.44187	3.46153	0.000634741	0.000357073	0.000320795
FCGBP	1.32088	1.13395	1.53863	0.000247965	0.00035773	0.000350672
ENPP6	0.713162	0.594142	0.856025	0.000292543	0.000358973	0.000284902
MSRB2	0.269022	0.131969	0.548409	0.00055414	0.000362307	0.000302551
RGS20	1.32477	1.12501	1.55999	0.00376982	0.000363116	0.000745065
FAM18B2-CDRT4	0.561314	0.407835	0.772552	0.000242062	0.00036338	0.000394998
CYP2J2	1.54325	1.21682	1.95727	0.000689064	0.00036362	0.000345744
CYP19A1	1.28966	1.12192	1.48248	0.000963395	0.000366583	0.000346021
MPP6	1.57662	1.22345	2.03174	0.00101968	0.000367151	0.00043391
RAB35	4.88036	2.0573	11.5773	0.000150264	0.000370967	0.000322203
LPPR2	1.32507	1.13897	1.54158	0.0010695	0.000371166	0.000267276
TNNC2	1.26142	1.10738	1.43688	0.00145616	0.000376569	0.000474213
TKT	0.308523	0.161436	0.589624	0.000610726	0.000377505	0.000372899
LHFP	1.4252	1.16899	1.73757	0.000562426	0.000380703	0.000457906
SLC4A8	0.639507	0.499184	0.819275	0.000888476	0.00038136	0.000404545
C17orf28	1.45682	1.18115	1.79684	0.000677226	0.000381801	0.000438937
RRAD	1.3104	1.12899	1.52097	0.000886071	0.000382711	0.000376928
SH3PXD2B	1.50451	1.21128	1.86873	0.00028573	0.000383858	0.000221746
FN3K	0.653847	0.518869	0.823937	0.000441537	0.000385076	0.000316324
DGCR6L	0.324892	0.176008	0.599716	0.000290321	0.000388083	0.00032458
YRDC	2.81279	1.60662	4.92452	0.000876854	0.000388295	0.000295466
PRDM14	1.54319	1.2046	1.97695	0.00227483	0.000395785	0.0005973
ZBTB20	0.733022	0.616574	0.871463	0.00216893	0.000396494	0.000433683
LOC285954	0.715875	0.594408	0.862165	0.000706399	0.000398289	0.000426272
PDE2A	1.49369	1.20655	1.84916	0.000953675	0.000398429	0.000229825
HAS1	1.47125	1.19022	1.81864	0.000737807	0.000398464	0.000356896
PDIA5	2.05293	1.40747	2.99439	0.000477801	0.00039866	0.000187962
FAM120C	0.384563	0.227562	0.64988	0.000630239	0.000399837	0.000357181
ABCA1	1.40512	1.16902	1.68892	0.00124725	0.000402689	0.000290365
LOC100132234	0.614331	0.475661	0.793427	9.80221e-05	0.00040437	0.000189414
NTNG2	1.48968	1.20265	1.8452	0.000746167	0.00040701	0.000262447
L1TD1	0.792389	0.695674	0.90255	0.000815768	0.00040962	0.000458727
SLC2A1	1.50704	1.20416	1.88611	0.000433861	0.000410163	0.000339857
EXTL2	0.654899	0.517559	0.828685	0.00129796	0.000412244	0.000423733
LOC550112	0.380591	0.223219	0.648912	0.000725324	0.000416365	0.000387414
ACCN2	1.46935	1.18517	1.82166	0.000539517	0.000416529	0.000449578
FAM101B	1.351	1.14596	1.59273	0.000532733	0.000417488	0.000340608
TESC	1.37654	1.15476	1.6409	0.000841608	0.000419422	0.000363441
CENPT	0.652307	0.515108	0.826049	0.000585903	0.000420568	0.000390959
LMO4	0.364174	0.207664	0.63864	0.000573875	0.000422261	0.000424105
SERPINI2	0.690145	0.562162	0.847266	0.000582206	0.000424271	0.000394539
PCMT1	0.224098	0.0975581	0.514769	0.000394037	0.000426348	0.00042358
AVPI1	0.69336	0.55963	0.859046	0.00616748	0.000426495	0.00080898
RIBC2	1.49685	1.19609	1.87323	0.00058549	0.000426687	0.000424181
PDE3A	1.19082	1.07579	1.31815	0.00447372	0.000426723	0.000753445
FZD6	1.60278	1.2278	2.09227	0.00122043	0.000427096	0.00052195
NUAK2	1.66468	1.26814	2.1852	0.000493604	0.000427793	0.000241382
FCRL1	0.673558	0.541479	0.837855	0.000342823	0.000429432	0.00038737
PNMA6C	1.45464	1.18644	1.78347	0.000664668	0.000430072	0.000313289
SPARC	0.678852	0.546734	0.842896	0.000489656	0.000431793	0.000452091
RTN3	0.536888	0.381348	0.755868	0.00095294	0.000432716	0.000365788
DOPEY1	0.444156	0.281915	0.699764	0.000486767	0.000436034	0.000466497
IRAK2	1.29314	1.13175	1.47755	0.000871908	0.000436984	0.000157062
LY6G6C	1.208	1.08803	1.34121	0.00155684	0.000437232	0.000398992
FUT3	1.29872	1.12054	1.50524	0.00157441	0.000437401	0.00051743
TIGD3	1.50958	1.19259	1.91082	0.00214301	0.000440156	0.00061575
MT1E	1.41701	1.16822	1.71879	0.00286154	0.000441097	0.000402723
SCD	0.766903	0.6567	0.8956	0.00635438	0.00044116	0.000799342
TAC4	1.56096	1.21962	1.99784	0.00097611	0.000442303	0.000404873
HNRNPD	3.7996	1.84066	7.84335	0.000788477	0.000443535	0.000306311
COL4A2	2.40061	1.48472	3.88148	0.000215952	0.000443971	0.000354092
SNCA	1.65376	1.2501	2.18777	0.000520593	0.00044466	0.000425979
SCHIP1	1.3141	1.12731	1.53184	0.00171503	0.000449084	0.000479542
SVEP1	0.615512	0.47115	0.804107	0.000411733	0.000450608	0.000372638
FAM174B	1.74688	1.28582	2.37325	0.00024235	0.000452789	0.000359787
FER	0.644494	0.506577	0.819959	0.00118175	0.000454071	0.000349277
PPP2R3B	0.468566	0.310014	0.708208	0.000312734	0.000455668	0.000321822
SDCBP2	1.38569	1.15433	1.66342	0.000602727	0.000456075	0.000465661
CYTH4	2.47742	1.49524	4.10478	0.000908293	0.000456635	0.000429134
LRRC59	3.17444	1.6899	5.96311	0.000543333	0.000456742	0.000329357
NRIP1	0.539984	0.383112	0.761089	0.000607877	0.000456766	0.000433169
GEM	1.29534	1.11846	1.5002	0.00136145	0.000461839	0.000551333
STYK1	1.32188	1.12739	1.54993	0.00146347	0.00046687	0.000588978
ZNF281	3.06609	1.66007	5.66296	0.000441224	0.000467745	0.000344758
MIR205HG	1.40429	1.15747	1.70373	0.00163697	0.000471114	0.000575786
SLC26A9	1.21447	1.08415	1.36045	0.00543565	0.000472149	0.000793401
CD244	1.35997	1.15064	1.60739	0.00102494	0.000472386	0.000311678
RHOBTB3	1.51109	1.19849	1.90522	0.000443074	0.000472693	0.000481038
EGOT	1.61074	1.21405	2.13705	0.00439916	0.000474255	0.000951351
GNG2	1.21217	1.08952	1.34863	0.0019238	0.000474918	0.000407609
PECAM1	0.327217	0.173685	0.616468	0.00100749	0.000479037	0.000546433
FGFR3	1.32963	1.12865	1.5664	0.00187075	0.000481537	0.000656086
COL22A1	1.29465	1.11845	1.49861	0.000692942	0.000486965	0.0005407
ENPP2	1.47747	1.18373	1.84411	0.00028402	0.00048811	0.000557729
BCL2L13	0.32521	0.173084	0.611042	0.000578176	0.000489481	0.00048166
PON3	1.47403	1.18406	1.835	0.000663072	0.000489708	0.000517168
NSUN4	0.352963	0.196854	0.63287	0.00065437	0.000490627	0.000472982
C9orf125	1.34551	1.13412	1.5963	0.00225811	0.000491537	0.000665997
ACSM1	0.690091	0.560088	0.850271	0.000422024	0.000492471	0.0004958
FAIM	2.15981	1.40382	3.32291	0.000560216	0.000493115	0.000459898
MACC1	0.71728	0.596601	0.86237	0.00199357	0.000493951	0.000407252
MYBPHL	1.62347	1.23596	2.13246	0.00141005	0.000497196	0.000496708
AKR7A2	0.284646	0.140738	0.575703	0.000759113	0.00050209	0.000471479
DYX1C1	0.622032	0.477232	0.810767	0.00205315	0.000504183	0.00044551
ITGB1BP1	2.98517	1.62225	5.49311	0.000395611	0.000506451	0.00043991
KCNN4	1.84019	1.30588	2.5931	0.000264177	0.000506568	0.000492133
SLC39A11	3.31944	1.70252	6.47198	0.000507203	0.000510249	0.000428384
SRPX2	1.19775	1.08366	1.32385	0.00217626	0.000511806	0.000410623
GIN1	0.623709	0.477648	0.814434	0.00151705	0.000517863	0.000524735
SYK	0.309479	0.15938	0.600936	0.00099936	0.000518438	0.000532011
HSD17B8	0.408423	0.254878	0.65447	0.000243977	0.000519789	0.000197569
MT1B	1.98484	1.34782	2.92294	0.000864829	0.000528162	0.00051761
DIRC3	1.34402	1.13766	1.5878	0.000734773	0.00053238	0.000508049
C7orf40	3.21198	1.66436	6.19868	0.000414818	0.000534362	0.00050388
FBXL14	0.600582	0.449749	0.801999	0.00181796	0.000541753	0.000549703
YAP1	1.26239	1.1007	1.44783	0.0045112	0.00054401	0.00086236
RASL11A	0.606254	0.456506	0.805125	0.00115347	0.000544092	0.000545285
SESN2	0.417662	0.254503	0.685421	0.00107988	0.000544246	0.000551371
NCOA6	3.12293	1.63781	5.95473	0.000333301	0.000549321	0.000543862
AMBRA1	0.395278	0.232552	0.671872	0.000840957	0.000550043	0.000605133
SAMD13	0.663167	0.525895	0.836271	0.0013389	0.000551023	0.000518541
NEK11	0.519383	0.358869	0.751692	0.00119326	0.00055161	0.000514254
OR4C15	0.625005	0.479589	0.814512	0.000925777	0.00055743	0.00050448
AREG	1.2948	1.11682	1.50114	0.000746061	0.00056632	0.00061627
LRRC4	1.15013	1.06085	1.24693	0.00185491	0.000566336	0.000692165
LHPP	0.327529	0.17316	0.619515	0.00064463	0.000571366	0.000598284
PEX14	0.410885	0.248074	0.680549	0.00102398	0.000573825	0.000550584
INHBA	0.797782	0.698942	0.910598	0.00459734	0.00057707	0.000814689
BYSL	2.15937	1.42048	3.28261	0.00117055	0.000579097	0.000315155
HSD17B11	0.409394	0.247175	0.678078	0.000586002	0.000579157	0.000522407
SMPDL3A	1.47746	1.18455	1.8428	0.000761943	0.000582057	0.00053579
ZNF614	0.530307	0.370063	0.75994	0.000792898	0.000582343	0.000549429
CCBL2	0.340485	0.187093	0.619641	0.000445337	0.000582642	0.000420883
MSRB3	1.34776	1.12711	1.61159	0.00507509	0.000583262	0.0010688
IL1B	1.80151	1.28569	2.52429	0.000874345	0.000588366	0.000626186
NHLH2	0.58378	0.430046	0.792473	0.000530138	0.000591098	0.000557353
FUZ	0.387558	0.225685	0.665534	0.000752134	0.000592917	0.000590772
ACER1	0.597687	0.454089	0.786697	0.000139996	0.000595567	0.000241366
ARHGEF5	0.598074	0.447764	0.798841	0.000778764	0.000595665	0.000499957
OVCH1	0.763763	0.654499	0.891267	0.000503701	0.000596327	0.000623175
PLEKHG6	0.625211	0.479515	0.815176	0.000796515	0.000602719	0.000521278
NAT8L	0.62996	0.483244	0.82122	0.00175885	0.00060337	0.000635513
USP33	0.426129	0.261223	0.695137	0.000421467	0.000607651	0.000634541
CAPN8	1.26128	1.09776	1.44916	0.00583062	0.000609459	0.00105071
C1orf38	0.36425	0.205054	0.647039	0.000736042	0.000615917	0.000571012
DPYSL3	1.36647	1.14241	1.63449	0.000679707	0.00062196	0.000633213
FNDC5	1.20646	1.08258	1.34453	0.000937882	0.000622142	0.000685569
MAFG	2.94543	1.59051	5.45458	0.00030878	0.000622446	0.000590376
CCR5	1.83022	1.293	2.59066	0.000537399	0.000625382	0.000651119
MAOA	1.40941	1.15823	1.71507	0.00044581	0.000630644	0.000610923
ITGA7	1.91709	1.32413	2.77559	0.000916008	0.00063304	0.000566944
MED13L	1.95086	1.33708	2.8464	0.000971392	0.000637535	0.000526194
TOP1MT	0.402112	0.237714	0.680203	0.000884461	0.000637712	0.000681737
MT1H	1.88509	1.3109	2.71078	0.00127939	0.000644792	0.000624856
CTPS	1.46906	1.17882	1.83076	0.00309789	0.000647632	0.000615159
PHF23	3.74063	1.75393	7.97767	0.000459596	0.000647672	0.000640333
TMEM102	0.4059	0.243659	0.676167	0.000596237	0.000652406	0.000534531
KPNA2	4.56514	1.90239	10.9549	0.000485645	0.000655798	0.000673978
DCLK1	1.29478	1.1143	1.50448	0.00314114	0.000657139	0.000743299
C9orf102	0.633353	0.500225	0.801911	0.000193616	0.000661426	0.000148491
HBD	1.16422	1.06563	1.27193	0.000930235	0.000665608	0.000757263
PDLIM1	0.542496	0.382561	0.769293	0.000731656	0.000666084	0.000599798
PIK3CD	1.82178	1.29655	2.55979	0.00104008	0.000667748	0.000547078
SNX7	0.69414	0.562754	0.856201	0.0020178	0.000668713	0.000649393
LRIG3	1.28117	1.10829	1.48101	0.00360196	0.000669242	0.000807335
EGR4	1.56621	1.20512	2.03548	0.00214631	0.000670459	0.000792681
C18orf55	3.1039	1.62758	5.91932	0.000874052	0.000674171	0.000584273
CCL1	1.49125	1.18161	1.88204	0.00170099	0.000678083	0.000764693
TMEM14A	0.517141	0.356482	0.750205	0.000422212	0.000681821	0.000512539
ZNF846	0.646687	0.503748	0.830185	0.00100969	0.000687991	0.000625619
SPAG5	1.64008	1.23975	2.16966	0.00128849	0.000692382	0.000529753
FOXP1	0.460732	0.304697	0.696674	0.000530188	0.000692603	0.000239577
AKAP2	1.21157	1.08283	1.35563	0.00371825	0.000693328	0.000813308
LRRC8A	2.95071	1.5867	5.48731	0.000640192	0.000693677	0.000629801
MYO1G	0.528186	0.365365	0.763567	0.00105039	0.000693685	0.000687489
FAM3B	0.759214	0.646716	0.89128	0.0011259	0.000700664	0.000761109
LOC100132344	1.5786	1.20966	2.06007	0.00121426	0.000727682	0.00077551
NRP2	1.22472	1.09249	1.37297	0.000941812	0.000730881	0.000506391
PDLIM4	1.42058	1.15864	1.74173	0.00256759	0.00074112	0.000735549
GALNT6	0.356415	0.197529	0.643105	0.00110867	0.000742591	0.000612738
C9orf91	1.82037	1.28511	2.57859	0.00127368	0.000743221	0.00074645
MYOC	1.86833	1.28976	2.70643	0.006713	0.000747004	0.000947276
PTGDS	1.38849	1.1487	1.67833	0.00122695	0.000748646	0.000690781
UBFD1	2.05291	1.35921	3.10064	0.00188984	0.000749966	0.000629127
ZCCHC7	0.630071	0.481252	0.82491	0.00197332	0.0007508	0.000779123
ASB1	1.42966	1.1604	1.76139	0.00502996	0.000753617	0.000787151
LSAMP	0.775018	0.668045	0.899121	0.00391377	0.000758745	0.000770524
ZNF589	0.637982	0.490945	0.829057	0.00138937	0.000759323	0.000772462
AGRP	0.767752	0.660106	0.892953	0.00416982	0.000760834	0.00060597
SLC16A9	1.70701	1.25517	2.32152	0.00133023	0.000763643	0.000652801
LOC100128697	1.55989	1.19631	2.03396	0.00316602	0.000769877	0.00102421
PNKD	0.223488	0.0938113	0.532418	0.000589647	0.00077232	0.000716631
RPAP2	0.369442	0.207124	0.658964	0.00142306	0.000773214	0.000744534
HBB	1.17899	1.06991	1.2992	0.000880729	0.000776238	0.00088671
PANX1	1.72977	1.26656	2.36239	0.00115293	0.000778545	0.000569168
SUPT3H	0.678029	0.540059	0.851245	0.00150754	0.000782096	0.000815671
IFT140	0.56355	0.403547	0.786993	0.000842509	0.000787086	0.000763341
GFRA2	1.47387	1.17384	1.85058	0.00110643	0.000789032	0.000837216
SLC22A17	0.566978	0.407473	0.78892	0.00108969	0.00078969	0.000760908
APCDD1	1.39105	1.13876	1.69923	0.00456465	0.000792924	0.0012269
LOC283050	1.38522	1.14672	1.67333	0.000704407	0.000795641	0.000724664
WSB2	4.02467	1.82058	8.89715	0.000286828	0.000799287	0.000581091
RNF168	0.467334	0.300476	0.72685	0.00114581	0.000799472	0.000736292
CYYR1	1.35239	1.12575	1.62465	0.0051306	0.000802837	0.00125673
CCR1	2.30799	1.41233	3.77166	0.000686691	0.000803878	0.000844718
BANP	2.84604	1.55765	5.20013	0.00136783	0.000811793	0.000671323
ATP1B1	0.68039	0.541503	0.8549	0.00548803	0.000812546	0.000947256
TCEAL1	0.514897	0.369513	0.717481	0.000318902	0.00081525	8.80825e-05
SV2B	1.23543	1.09013	1.40008	0.00171008	0.000818674	0.000926784
YWHAH	0.464767	0.297934	0.725021	0.00244032	0.00082031	0.000732033
MKRN1	0.292356	0.142276	0.60075	0.00108587	0.000821337	0.00081772
GALR2	0.612035	0.458174	0.817566	0.000631342	0.000821858	0.000889124
MEGF11	0.451593	0.283997	0.718091	0.00104673	0.000824057	0.000781253
CKAP4	2.17401	1.38145	3.42126	0.000878835	0.000824449	0.000788828
OR52K2	0.678944	0.541799	0.850804	0.00132001	0.000828073	0.000769839
CYP4B1	1.33015	1.12403	1.57408	0.00126131	0.000830025	0.000897064
C1orf182	0.616533	0.46547	0.816623	0.00143383	0.000835656	0.000744583
EHF	1.41452	1.14917	1.74113	0.00266103	0.000842875	0.00106906
MIDN	2.7071	1.53635	4.76998	0.000987779	0.000843364	0.000569525
MRPL3	2.87851	1.57526	5.25997	0.000988491	0.000843767	0.000587436
FLRT3	1.35824	1.1294	1.63345	0.00373831	0.000844351	0.00114359
CDH3	1.41288	1.1547	1.72878	0.00130915	0.000845004	0.000787554
LOC153577	2.08579	1.36625	3.18427	0.000460818	0.000856045	0.000659978
PTP4A2	0.431229	0.267135	0.696123	0.00116713	0.000863147	0.000576411
NAV2	1.17924	1.07276	1.29629	0.00319271	0.000863401	0.000638641
PDE4B	1.62736	1.21952	2.1716	0.00130594	0.000868882	0.000939042
RBM4B	0.493641	0.325803	0.74794	0.00249618	0.000869628	0.00086871
NRM	1.77699	1.27353	2.47947	0.00123353	0.000870591	0.000718107
LRRCC1	0.664452	0.522752	0.844562	0.00139862	0.000873128	0.000836523
SLC29A2	0.645823	0.500818	0.832813	0.000756262	0.000876639	0.000751451
C1orf95	1.25576	1.09467	1.44055	0.00334208	0.000885339	0.00114891
ZBTB22	0.564004	0.400849	0.793566	0.0029129	0.000886324	0.0010123
C7orf53	1.34908	1.13434	1.60447	0.00242878	0.000890188	0.00071181
C7orf70	0.301876	0.152591	0.597212	0.000474133	0.000894826	0.000579933
ASNS	1.63127	1.22368	2.17461	0.00129882	0.000895435	0.000849539
FAM13A	0.550598	0.393124	0.771153	0.000748828	0.000898443	0.000516837
PTPRO	0.58918	0.429904	0.807465	0.00483778	0.000903304	0.00100229
ZNF280D	0.666099	0.526209	0.843178	0.0016133	0.000904145	0.000729742
ZNF876P	0.462745	0.291467	0.734673	0.000419317	0.000905217	0.00108579
SLC38A11	1.99205	1.30341	3.0445	0.00953786	0.000905541	0.00145065
ZNF469	1.64037	1.22987	2.18789	0.00105863	0.000907835	0.000757165
C2orf65	0.710774	0.579884	0.871207	0.00200457	0.000912689	0.00101002
IGFALS	1.25753	1.09824	1.43993	0.00338011	0.000915867	0.000913134
PIAS2	0.407243	0.240023	0.690962	0.00142962	0.000919675	0.000867064
MICALL2	2.23938	1.38925	3.60975	0.000874989	0.000920966	0.000934302
MS4A7	0.41553	0.247859	0.696626	0.000907268	0.000923067	0.000864559
ADAMTSL4	0.570288	0.408776	0.795614	0.00176814	0.000927605	0.000947027
ATP8B3	0.74325	0.624442	0.884664	0.00200897	0.000929802	0.000840884
COQ2	0.430037	0.262217	0.705263	0.00278772	0.00092998	0.000827546
CYP3A7	0.679155	0.540947	0.852674	0.000528703	0.000932182	0.000859543
EXT1	1.45413	1.17857	1.79413	0.00227991	0.000932421	0.000478297
TDG	1.54702	1.19836	1.99712	0.00487882	0.000933207	0.000811816
SH3KBP1	1.9861	1.33852	2.94698	0.00175012	0.000937025	0.000654056
BBX	0.434037	0.263233	0.715671	0.00120799	0.000937687	0.0010714
ICOSLG	1.84303	1.28231	2.64892	0.000578	0.000939043	0.000954687
C1S	1.39922	1.14945	1.70327	0.000643412	0.000940982	0.000813081
FXC1	0.213151	0.0851291	0.533697	0.00110315	0.000942963	0.000963889
WFDC2	1.24745	1.09672	1.4189	0.00118477	0.000943966	0.000765183
ARNTL2	1.67119	1.24311	2.24668	0.00168968	0.000945755	0.000670624
IL18RAP	1.38415	1.14356	1.67535	0.00407839	0.00094652	0.000847019
EEPD1	1.8266	1.30029	2.56593	0.000525826	0.000956904	0.000512276
C1orf106	1.32064	1.11475	1.56456	0.0052629	0.000957212	0.00129922
CCDC85C	0.622002	0.469917	0.82331	0.00199356	0.0009625	0.000903372
ZFP36	1.35059	1.1305	1.61353	0.00290804	0.000963081	0.000927963
TBC1D19	0.603169	0.446612	0.814605	0.00213685	0.000964819	0.000976015
VSIG10	0.694274	0.558061	0.863734	0.00276853	0.000968266	0.00105808
TBC1D9	0.416697	0.247832	0.70062	0.000966369	0.000973011	0.000959958
CFI	1.28486	1.10344	1.4961	0.00281551	0.000995755	0.00124928
BMPR1A	0.603206	0.463725	0.784641	0.000659422	0.0010019	0.000164825
PAICS	2.98565	1.55922	5.71705	0.000577862	0.00100379	0.000966581
CAPN11	0.730157	0.607902	0.876999	0.000252017	0.00100547	0.000768811
PYCR1	1.306	1.11153	1.53449	0.00313245	0.00100658	0.00117326
CBFA2T3	1.26756	1.10128	1.45895	0.00256826	0.0010068	0.000951151
EGFL6	1.39365	1.13316	1.71402	0.00610681	0.00101213	0.00166632
LOC100288615	0.480214	0.310849	0.741858	0.000973331	0.00101284	0.000947833
CDH23	0.650631	0.509222	0.83131	0.000566778	0.00102833	0.00058689
SLIT3	0.618068	0.466014	0.819735	0.00128284	0.00103019	0.000838939
FFAR2	1.51814	1.18714	1.94142	0.000943064	0.00104242	0.000877518
CDH1	1.22529	1.08477	1.38401	0.00142426	0.00104934	0.00107816
RELB	1.76276	1.25414	2.47764	0.00119977	0.00105029	0.00109953
TSPAN19	1.38768	1.1361	1.69497	0.00331724	0.00105219	0.0013264
FXYD2	1.25717	1.09554	1.44265	0.00212528	0.00105251	0.00111581
CBX7	0.416688	0.262238	0.662103	0.000110167	0.00105469	0.000211281
FSCN1	1.67363	1.22764	2.28165	0.000876112	0.00106008	0.00112555
ATP2B4	1.86441	1.28733	2.7002	0.00104736	0.00106127	0.000978992
DSG2	1.35579	1.12519	1.63366	0.00353186	0.00106396	0.00137445
EFCAB10	1.27165	1.09784	1.47298	0.0061395	0.00106563	0.00135143
C8orf4	1.34276	1.11978	1.61014	0.00560428	0.00106662	0.00146793
FHL3	1.50103	1.17939	1.9104	0.00140679	0.00106739	0.000963648
C15orf52	0.517671	0.349535	0.766686	0.00286817	0.0010676	0.00101678
HLCS	0.438412	0.266547	0.721092	0.00177565	0.00107643	0.00116261
ASPHD1	1.27919	1.10425	1.48185	0.00179462	0.00108448	0.00103199
LETMD1	0.396685	0.227676	0.691152	0.00142047	0.00108748	0.00109867
CYP2U1	0.625172	0.47101	0.829793	0.00169846	0.00109147	0.0011481
LIMS1	2.13502	1.35336	3.36814	0.00117355	0.00109511	0.00111072
F12	0.508691	0.338874	0.763606	0.00134567	0.00109705	0.00110912
ZNF484	0.600429	0.442084	0.815489	0.00300931	0.00109923	0.00109159
NRAP	1.21027	1.078	1.35877	0.00170666	0.0011019	0.00122999
ABCB4	1.20193	1.07379	1.34535	0.00502916	0.00110396	0.0013845
OR1F1	1.23411	1.0854	1.40319	0.00347098	0.00111145	0.00132327
SIGLEC8	1.30216	1.1112	1.52594	0.00263686	0.00112094	0.00110177
ACOXL	1.37771	1.13747	1.66868	0.00219403	0.00112107	0.00104724
RWDD2A	0.456031	0.287742	0.722746	0.000914439	0.00112446	0.000831948
CITED4	1.62774	1.21807	2.17519	0.00227052	0.00112484	0.000989363
GPR183	1.48976	1.17035	1.89633	0.00109288	0.00113264	0.0012053
PM20D2	1.84584	1.29851	2.62387	0.000399337	0.00113502	0.00063645
BCL2	1.49374	1.17458	1.89961	0.00209991	0.00115312	0.00106791
EIF4EBP2	0.258619	0.113607	0.588728	0.00103964	0.00115616	0.00127186
CCDC90A	3.46886	1.65831	7.25615	0.00124519	0.00115857	0.000955828
UBE2D4	0.32473	0.164874	0.639577	0.00188191	0.00116308	0.00114451
POLB	0.419451	0.252253	0.69747	0.00120405	0.00116417	0.000812053
TFPI	1.15922	1.06031	1.26736	0.00362597	0.0011722	0.00116656
TMEM136	1.37934	1.13419	1.67748	0.0016027	0.00117565	0.0012769
C9orf47	1.26181	1.09517	1.45381	0.00371748	0.00118377	0.00129126
NEK8	0.678139	0.534728	0.860012	0.00146568	0.00118597	0.00135523
RND3	0.741989	0.620152	0.887764	0.00232845	0.00119558	0.00111094
ITM2B	0.250072	0.107758	0.580334	0.00135844	0.00120336	0.00125171
SERPINA9	0.723596	0.593965	0.88152	0.00163172	0.00120425	0.00131819
SAMSN1	1.77038	1.25176	2.50387	0.00146665	0.00121084	0.00123974
NUP62	4.02371	1.75222	9.23985	0.000951292	0.00121124	0.00102954
FAM151B	0.660599	0.513311	0.850149	0.00364205	0.0012122	0.00127615
ATHL1	1.50018	1.18382	1.90107	0.00123825	0.00121251	0.00078942
C8orf83	0.558114	0.391789	0.795048	0.00136706	0.0012139	0.00123626
GALNT12	0.632725	0.479741	0.834496	0.00338073	0.00121623	0.00119062
FBXL18	1.54374	1.1998	1.98627	0.00179594	0.00121867	0.000734386
C15orf27	0.732884	0.606182	0.886068	0.00237048	0.00122542	0.00133186
NOP16	1.61322	1.21653	2.13928	0.00333973	0.00122659	0.000896686
MEI1	1.52192	1.18313	1.95773	0.00195785	0.00122715	0.00107991
CDKN2B	1.16154	1.0591	1.27389	0.00286836	0.00122829	0.00147803
ATG4C	0.592844	0.433117	0.811477	0.00113862	0.00122868	0.00109771
ZFP90	0.322891	0.163022	0.639537	0.00158845	0.00123084	0.00118729
XRCC4	0.440825	0.267958	0.725213	0.000826419	0.00123171	0.00126011
C20orf24	4.69092	1.81831	12.1018	0.000784777	0.00123348	0.00139114
VAMP1	1.29675	1.10502	1.52175	0.00485476	0.0012395	0.00145602
CDK9	0.346938	0.181948	0.66154	0.00179837	0.00125067	0.00130589
TMEM42	0.32485	0.163681	0.644715	0.00151132	0.00125796	0.00130404
IRF9	0.296689	0.142105	0.619429	0.00138069	0.00125871	0.00121547
SPAG9	1.27463	1.09842	1.47911	0.00686775	0.00126568	0.00139044
CDC42EP4	0.600968	0.440104	0.820628	0.00197294	0.00126766	0.00135682
ACRC	1.50404	1.17604	1.92352	0.00239624	0.0012768	0.00114638
ZNF248	0.564887	0.402736	0.792323	0.000799775	0.00128224	0.000938132
DIXDC1	0.718351	0.587365	0.878547	0.00538501	0.0012973	0.00127903
C22orf36	1.61653	1.2038	2.17077	0.000689978	0.00130092	0.00140733
HIVEP2	1.33224	1.12045	1.58407	0.00251561	0.00130744	0.00116457
NUDT5	3.76947	1.7009	8.35375	0.000807358	0.00130804	0.00108239
FXYD3	1.3866	1.13686	1.69122	0.0016858	0.00131341	0.0012558
CCR2	1.5284	1.18341	1.97396	0.00148805	0.00132453	0.00115335
SRC	0.565272	0.399245	0.800343	0.00221443	0.00133448	0.0013032
ETV1	0.69504	0.571399	0.845433	0.000373517	0.00133532	0.000272619
EPDR1	1.51379	1.17911	1.94347	0.0012702	0.00133744	0.00114434
C11orf63	0.49693	0.325054	0.759687	0.00223279	0.00134111	0.0012418
XK	0.718523	0.586609	0.880102	0.00297424	0.00134899	0.00140296
JAK1	2.56215	1.47912	4.43818	0.00188561	0.00135211	0.000789497
KPTN	0.55891	0.392045	0.796797	0.00179517	0.00135472	0.00130232
HSPE1	3.82907	1.68174	8.71824	0.00114927	0.00135807	0.00138271
FBXO15	1.34495	1.12154	1.61287	0.00188834	0.00135909	0.00138591
KBTBD3	0.621442	0.463852	0.832572	0.00171434	0.00136436	0.00143324
ABCG1	0.68892	0.545607	0.869877	0.00897583	0.00136826	0.00173935
FAM164A	0.571987	0.406093	0.805651	0.00150035	0.00136897	0.00139103
PSTPIP1	1.3714	1.13003	1.66434	0.00373857	0.00137394	0.0013859
SNRPA1	3.22127	1.56551	6.62825	0.000963541	0.00137593	0.00148592
SMAD3	1.15007	1.05469	1.25406	0.00607598	0.00137969	0.00154771
DAPP1	0.449133	0.274752	0.734189	0.00183075	0.001388	0.00141168
PEG10	1.28281	1.09768	1.49918	0.00433687	0.00139034	0.00173649
FBXO32	0.485691	0.313033	0.753581	0.00177601	0.00139187	0.00127154
SLC25A4	1.36787	1.13131	1.6539	0.00312425	0.00140271	0.00122273
RIMS4	1.29005	1.10146	1.51094	0.00334562	0.00140494	0.00158677
LOC100134229	1.34748	1.12231	1.61783	0.00433164	0.00140956	0.00138951
BAG4	0.465853	0.290354	0.74743	0.00309241	0.00141414	0.00154103
GNL3	3.67521	1.67563	8.06098	0.000521759	0.00142068	0.0011619
LMBRD1	0.359427	0.191495	0.674626	0.00169731	0.00142966	0.0014468
DOT1L	1.25919	1.09498	1.44803	0.00497666	0.00143121	0.00122665
COL8A1	1.20884	1.0729	1.36201	0.00624847	0.00143689	0.00183337
ZNF562	2.94139	1.5275	5.66402	0.00109588	0.0014383	0.00125044
SORBS2	1.42504	1.14685	1.77072	0.0018719	0.00144719	0.00139112
ARHGAP12	1.51936	1.18167	1.95355	0.0021583	0.00144782	0.00110794
SGCE	1.14711	1.05124	1.25172	0.00616185	0.00145556	0.00205533
CABYR	1.34736	1.12325	1.61619	0.00377324	0.00146399	0.00131747
ACSBG1	1.35296	1.12098	1.63296	0.00361553	0.00146483	0.00163277
HN1	0.331452	0.16769	0.655138	0.00211944	0.0014683	0.00149076
RHBDL2	1.79677	1.24556	2.59191	0.0042113	0.00147533	0.00172125
ACER3	0.715028	0.580448	0.880812	0.00472918	0.00147539	0.00161687
AGPAT9	1.53256	1.18354	1.98451	0.00185329	0.00147825	0.00120389
E2F3	1.66838	1.2201	2.28137	0.00368166	0.0014861	0.00134619
LIMD1	2.13665	1.35056	3.3803	0.00106504	0.00148787	0.00117881
NPNT	1.36098	1.1209	1.65247	0.0050688	0.00148992	0.00185409
WBP1	0.309442	0.150411	0.636621	0.00160131	0.00149993	0.00143828
ZNF74	0.520369	0.350603	0.772339	0.00128797	0.00150139	0.00118627
CAV2	1.57054	1.1891	2.07434	0.00198523	0.00150249	0.0014724
CCDC75	0.559773	0.389946	0.803561	0.00128674	0.00150593	0.00165724
TNNI2	0.582258	0.41968	0.807815	0.00133961	0.0015073	0.00120571
SAMM50	0.331681	0.16697	0.658874	0.00205494	0.00151105	0.00162498
ZNF688	0.284717	0.131889	0.614638	0.00169646	0.00152612	0.00137611
STXBP4	0.64998	0.498134	0.848113	0.00173319	0.00152653	0.00150616
SPINK7	0.567954	0.404853	0.796762	0.00120712	0.00152774	0.00105505
HLA-DQA2	0.692418	0.552472	0.867815	0.00241544	0.00152783	0.00141944
LOC283392	0.749235	0.627401	0.894729	0.0018291	0.00154483	0.00143042
LOC285173	0.5626	0.391364	0.808757	0.000684936	0.00154913	0.00189489
TMEM5	0.355729	0.187209	0.675946	0.00208756	0.00155202	0.00160107
UGDH	1.31696	1.1219	1.54593	0.00367467	0.00155496	0.000761656
H3F3A	4.71096	1.81514	12.2267	0.00134829	0.00155564	0.00144695
SLC12A7	0.397966	0.223719	0.707926	0.00158619	0.00155662	0.00171638
GPR65	0.404655	0.231174	0.708322	0.00133062	0.00155724	0.00153896
LOC100506459	1.47669	1.16262	1.87561	0.00281353	0.00155787	0.00139866
MAP1LC3B	3.39498	1.62857	7.07732	0.000878295	0.00156511	0.00110947
RAB37	1.33451	1.11873	1.5919	0.00356559	0.0015677	0.00134213
FAM49B	2.63831	1.44673	4.81133	0.0019836	0.00158069	0.00155263
LIMA1	0.509363	0.334922	0.774659	0.00218265	0.00158506	0.00161277
ETNK2	1.1896	1.07133	1.32093	0.00444514	0.00158768	0.00115602
ZNF354C	0.639916	0.485339	0.843726	0.00159858	0.00158884	0.0015533
DAPL1	1.3416	1.11285	1.61738	0.00724553	0.00159018	0.00206319
CARD8	2.18256	1.34735	3.53551	0.00134924	0.00159569	0.00151704
TRMT2B	0.594122	0.432243	0.816626	0.00264962	0.00159686	0.00133599
MAD2L2	2.99011	1.5163	5.89642	0.00222779	0.00159815	0.00156965
MSRA	0.40749	0.23361	0.710793	0.00271218	0.0016028	0.0015639
PKIA	0.539886	0.367068	0.794069	0.00259662	0.00160284	0.00173997
KDM1B	0.538952	0.367006	0.791458	0.00171977	0.00160329	0.00161647
CD302	0.397007	0.224562	0.701875	0.000995187	0.00160428	0.00148488
RTP4	0.438383	0.262587	0.73187	0.00173472	0.00160541	0.00161209
STARD7	0.310607	0.15323	0.629619	0.00261535	0.00160553	0.00118172
MLXIPL	1.4043	1.13409	1.73889	0.00342974	0.00160659	0.00184551
PRDM1	1.36689	1.12835	1.65586	0.00218437	0.00160778	0.00140267
PMM2	1.98753	1.31415	3.00594	0.00243255	0.00160929	0.00113688
CD101	0.750079	0.626531	0.897989	0.00321106	0.00161257	0.00173808
MECR	0.377033	0.205939	0.69027	0.00170987	0.00161309	0.00157071
BPNT1	0.433169	0.258985	0.724503	0.00192283	0.00161785	0.00143273
GPR126	1.4406	1.14481	1.81281	0.00435202	0.00161942	0.00184997
TBX4	1.34172	1.11202	1.61886	0.00646741	0.00162241	0.0021533
NEK7	0.64737	0.493956	0.84843	0.00165212	0.00163484	0.00162683
CREB5	1.93659	1.35192	2.77412	0.000123587	0.00165246	0.000312997
RYR1	0.647091	0.494254	0.847188	0.00386815	0.00165432	0.00154403
IL6R	1.71937	1.23137	2.40077	0.00214538	0.00165439	0.00146318
C1orf187	1.45595	1.15597	1.83378	0.00279992	0.00165718	0.00141667
ZBTB16	1.20476	1.07036	1.35604	0.00501332	0.00166877	0.0020249
CTNNAL1	1.58014	1.19628	2.08718	0.00218117	0.0016698	0.00127248
BMP2	1.40426	1.13259	1.74109	0.00345103	0.00167096	0.00196839
LOC100652967	0.708022	0.570773	0.878273	0.00220495	0.00167702	0.00168621
DCLRE1A	1.50393	1.17207	1.92974	0.0046105	0.00167958	0.00133572
ZNF479	0.682174	0.542481	0.857837	0.000851294	0.00169071	0.00106931
PLA2G2D	1.19604	1.06927	1.33783	0.00545539	0.00169604	0.00173793
HMOX1	1.62597	1.19789	2.20703	0.00290795	0.00170192	0.00181939
ANKRD29	1.70843	1.23915	2.35544	0.000843919	0.00170202	0.00108073
C4orf34	0.420144	0.246554	0.715953	0.001454	0.00170266	0.00142946
NT5DC1	0.508705	0.33234	0.778661	0.00178095	0.00170341	0.00185956
SOCS3	1.50795	1.16547	1.95107	0.00195342	0.00170553	0.00177874
F9	1.2021	1.06554	1.35615	0.0125846	0.00170657	0.00277306
DST	0.71203	0.575788	0.880508	0.00488043	0.00170946	0.00172233
ZNF462	1.33612	1.11484	1.60131	0.00271476	0.00171248	0.00170792
ZNF703	1.17244	1.05812	1.2991	0.0110221	0.00171336	0.00237061
BCL7A	1.17074	1.05878	1.29454	0.00787761	0.00171737	0.00211462
TMEM37	1.43182	1.14944	1.78357	0.00118752	0.00172688	0.00136179
FSTL3	1.43351	1.14568	1.79365	0.00463705	0.00172765	0.00163692
MTF1	1.70757	1.22785	2.37473	0.00299963	0.00173233	0.00147389
LAYN	1.19915	1.07139	1.34214	0.00619645	0.0017343	0.00157971
FOXK1	1.41599	1.14706	1.74796	0.00222343	0.00173615	0.00120901
BCL2L15	0.651487	0.500766	0.847572	0.00309613	0.00173871	0.00141357
MELK	1.56936	1.18739	2.0742	0.00164589	0.00173887	0.00154043
LOC150381	0.60625	0.444934	0.826054	0.00382058	0.00174329	0.00152111
EPB41L4B	1.26501	1.09007	1.46803	0.00684397	0.00174889	0.00196369
ADORA2B	2.08658	1.32308	3.29067	0.000846487	0.00175079	0.00155379
MAP3K3	2.03038	1.30923	3.14874	0.00386907	0.00175091	0.00155887
FAM83G	1.97963	1.30373	3.00595	0.00213162	0.00175856	0.00135266
LCE2A	0.708467	0.571032	0.878981	0.00148158	0.00176496	0.00173453
ALDH1A2	0.792235	0.683998	0.917601	0.00299467	0.00177219	0.00188828
RGS3	0.550082	0.378879	0.798644	0.00113761	0.00177312	0.00167866
IRX5	1.33333	1.1118	1.599	0.00348528	0.00177492	0.00191471
KCNMB4	1.29345	1.10004	1.52087	0.00488062	0.00178212	0.00184715
TLR8	0.542641	0.370303	0.795184	0.0012994	0.00178366	0.00171582
NKD1	1.33647	1.11047	1.60847	0.0053274	0.00179734	0.00215069
SCARNA17	0.483758	0.307493	0.761066	0.00100055	0.00180466	0.00168411
MAP2K3	2.35825	1.38572	4.01331	0.00266542	0.00180645	0.00156422
LOC100128219	0.615098	0.458348	0.825456	0.00112653	0.00181066	0.00120344
CSF1R	2.84779	1.47796	5.48722	0.00139845	0.00182787	0.00176368
CDK5RAP1	0.245934	0.102823	0.588225	0.00193486	0.00182968	0.00161818
MLF1	0.649336	0.497812	0.84698	0.00261164	0.00183082	0.0014479
DNAH3	1.51737	1.16326	1.97927	0.00396778	0.00183384	0.00210283
ANO6	2.22721	1.34806	3.6797	0.00224463	0.0018351	0.0017728
OSGIN1	1.30395	1.10947	1.53251	0.00292985	0.00184325	0.00127903
TMEM55A	1.746	1.24138	2.45575	0.00342494	0.00185744	0.00136298
EIF1	2.71156	1.44449	5.09006	0.00194655	0.00186263	0.00190603
PDE1B	0.639131	0.484552	0.843023	0.00340369	0.00187266	0.00153115
AZIN1	2.69891	1.43943	5.06041	0.00145607	0.00187296	0.00196363
CD14	2.35352	1.38228	4.00719	0.00166905	0.00187826	0.00162026
PROC	1.64226	1.20461	2.23891	0.00121952	0.0018847	0.00170525
GSX1	0.590475	0.425922	0.8186	0.00228995	0.00189128	0.00157287
FLJ11235	0.789077	0.68362	0.910802	0.00228237	0.00190089	0.00121053
RAB15	1.17434	1.06361	1.29661	0.00377105	0.0019153	0.00147151
FYB	1.68194	1.21396	2.33033	0.00308014	0.00191596	0.00177552
BCRP2	1.3382	1.11277	1.6093	0.00387927	0.00191672	0.0019667
CYB5R1	0.283246	0.127918	0.627182	0.00251147	0.00192256	0.0018695
FOXA1	1.20231	1.06757	1.35407	0.00622456	0.0019279	0.00238049
ZNF814	0.48717	0.31175	0.761299	0.0029246	0.00193685	0.00159197
HLA-DOA	0.535297	0.361089	0.793551	0.00380389	0.00193731	0.00186359
IL28RA	0.543267	0.368867	0.800123	0.00250432	0.00194465	0.00200953
POMGNT1	0.283247	0.13005	0.616906	0.00295977	0.00195114	0.00149202
LOC400236	2.25919	1.35481	3.76728	0.00113822	0.00195584	0.00178477
EEF1E1	2.35572	1.37833	4.02621	0.00246412	0.00195665	0.00172834
HIST1H3C	3.62939	1.63506	8.05629	0.00221481	0.00197042	0.0015323
TIRAP	0.539336	0.373451	0.778906	0.00185462	0.00197754	0.000993499
TSPAN16	1.31975	1.10383	1.5779	0.00404435	0.00198227	0.00233667
STAMBPL1	1.16564	1.05786	1.28441	0.00521614	0.00198756	0.00196012
ZNF93	0.523294	0.353231	0.775234	0.000840702	0.00199382	0.00123973
TLR7	0.595172	0.428451	0.826766	0.00256826	0.00199387	0.00197228
TGFBI	2.62394	1.42852	4.81972	0.00164474	0.00199628	0.00187374
PGM5	0.629031	0.4724	0.837596	0.001321	0.00199998	0.00150901
FAM100B	2.58631	1.42202	4.70385	0.00285383	0.00200244	0.00184798
HSD17B7	0.471675	0.293177	0.758851	0.00330173	0.00201846	0.00195245
CLU	1.25892	1.08778	1.45698	0.00244746	0.00202097	0.00201055
ENPP4	0.538224	0.363606	0.796701	0.00238798	0.00202295	0.00196329
PEX3	0.430637	0.254241	0.729421	0.00183826	0.00202359	0.00172803
CPNE5	1.29495	1.10215	1.52146	0.00400237	0.00202702	0.001675
SLC9A1	0.584346	0.414459	0.823869	0.00242743	0.00203268	0.00217394
CTSK	1.37928	1.12584	1.68976	0.00361191	0.00203373	0.00190771
ATP5E	4.44897	1.71182	11.5627	0.0023483	0.00203912	0.00219076
PRF1	1.23669	1.08179	1.41378	0.00351224	0.00203927	0.00186227
ZNF543	0.640263	0.482587	0.849457	0.00646244	0.00204271	0.00199439
CCDC125	0.475339	0.295902	0.763589	0.00176008	0.00206649	0.00210318
BCAR1	0.732021	0.599602	0.893683	0.00862927	0.00207213	0.00218374
FGFBP2	1.1507	1.05036	1.26062	0.0077899	0.00207562	0.0025664
DNAJC5B	0.713405	0.577216	0.881727	0.00383332	0.00207764	0.00178053
MOS	0.453896	0.276703	0.744558	0.00241838	0.00207843	0.00175962
TBC1D22A	0.412024	0.235067	0.722192	0.00339874	0.00209033	0.00195746
APOBEC3A	1.247	1.08362	1.43502	0.00265885	0.00209173	0.00206517
YIPF2	0.393445	0.218728	0.707723	0.00341492	0.00209467	0.00184551
RBMS2	0.455539	0.277174	0.748684	0.00360692	0.00209533	0.00192371
TPD52L1	0.741637	0.613961	0.895862	0.00417814	0.00209952	0.00193001
TIPARP	0.46863	0.2895	0.758597	0.00167792	0.00211216	0.00204084
CRABP2	1.35955	1.11915	1.6516	0.00333909	0.00211325	0.00197633
PMAIP1	1.32385	1.10612	1.58444	0.00323703	0.00211428	0.00221297
GARS	2.17506	1.34259	3.5237	0.00431434	0.0021158	0.00159515
CSNK1E	0.25882	0.109141	0.613774	0.00220553	0.0021243	0.00215551
NDC80	1.91415	1.26313	2.90069	0.00195159	0.00212629	0.00220309
CDC42EP3	0.730208	0.596227	0.894297	0.00314848	0.0021395	0.00236467
FCHO1	0.513545	0.334721	0.787905	0.0028217	0.00213964	0.00227721
MEGF6	1.4511	1.14205	1.84377	0.0013159	0.00214942	0.00231147
AMDHD2	2.09978	1.30479	3.37915	0.00309572	0.00215008	0.00224393
SERPINA7	1.34228	1.10664	1.62809	0.00968977	0.0021585	0.00280126
DONSON	1.92464	1.27321	2.90937	0.000916154	0.00217305	0.00189847
C1QA	0.7694	0.643943	0.919299	0.018304	0.00217611	0.00389588
ASRGL1	0.424444	0.245364	0.734227	0.00198007	0.00218407	0.00217797
KIR2DS2	1.21874	1.07358	1.38352	0.00630624	0.00218546	0.00223342
ING5	0.590468	0.423506	0.823253	0.00275296	0.0021874	0.0018903
SCP2	0.498683	0.319241	0.77899	0.0017311	0.00218952	0.00223215
LOC100508384	1.49662	1.16265	1.92652	0.00208641	0.00219151	0.00174972
ZCWPW1	0.475721	0.296888	0.762275	0.00256537	0.0021924	0.00201241
LSM1	5.43157	1.8922	15.5913	0.000809592	0.00219243	0.00165903
NGFR	1.1893	1.06106	1.33303	0.00915094	0.00219352	0.00290009
IDUA	0.518489	0.340744	0.788952	0.00261865	0.00219501	0.00216409
KLF9	1.74401	1.21794	2.49731	0.00363169	0.00219709	0.00239509
BCAS1	1.28238	1.09278	1.50488	0.00443769	0.00219836	0.0023124
TK2	0.547599	0.374016	0.801744	0.00312162	0.00219998	0.0019619
IPO4	1.78213	1.24858	2.54366	0.00358771	0.00220517	0.00145785
RNF208	0.613096	0.448436	0.838217	0.00433099	0.00222214	0.00217011
OXCT1	1.3672	1.12204	1.66592	0.00191468	0.00222568	0.00192197
WNT6	1.39199	1.13347	1.70947	0.00395778	0.00226406	0.001604
LRIG1	1.4837	1.15327	1.90879	0.00441109	0.00227591	0.00214505
SLC35F2	1.55784	1.17843	2.05941	0.00181526	0.002285	0.00185304
LOC729770	0.649497	0.495153	0.851952	0.00152556	0.00230003	0.00182487
ZNF99	0.592839	0.424365	0.828198	0.00210833	0.0023029	0.00217639
PRG2	1.31003	1.09984	1.5604	0.00724879	0.00230993	0.00247473
DHX58	0.353505	0.181186	0.689708	0.00217648	0.0023116	0.00229351
CDK5	0.32836	0.161538	0.667459	0.00294749	0.00231559	0.00209116
PKIG	0.716857	0.587623	0.874512	0.000673955	0.00231761	0.00103068
BACE1	0.627589	0.470469	0.837181	0.0045688	0.00232115	0.00153099
AKR1B10	0.534028	0.351564	0.811191	0.00066709	0.00232701	0.00327161
KLHL33	0.626374	0.4632	0.84703	0.00314361	0.0023344	0.00238012
DHRSX	0.387233	0.211202	0.709978	0.00355049	0.00233751	0.0021594
CEP120	0.512658	0.333154	0.788879	0.00318117	0.00233974	0.00237871
BEX4	0.500626	0.321274	0.780103	0.00247004	0.00234601	0.0022338
LOC100127909	0.74584	0.619229	0.898339	0.00437378	0.00234854	0.00200533
OCIAD2	1.63476	1.19402	2.23819	0.00298855	0.00234897	0.0021677
MGC16703	0.57496	0.403118	0.820056	0.002991	0.00235379	0.00225047
EXOC4	0.617998	0.45333	0.842481	0.00305758	0.00235702	0.00233351
SPINK5	1.49679	1.1502	1.94783	0.00449338	0.00235881	0.00268878
PFKP	2.25814	1.33346	3.82404	0.00163692	0.0023654	0.00243987
MAP3K14	1.90033	1.26114	2.86347	0.00200056	0.00236791	0.00214722
TGFBR3	1.27096	1.08614	1.48722	0.00700003	0.00237293	0.00278392
C6orf64	0.497129	0.317709	0.777874	0.00368318	0.00237627	0.0022163
GRAMD4	2.40275	1.36345	4.23426	0.00251865	0.00238013	0.00242645
VPS33A	3.24709	1.52385	6.91904	0.00281867	0.00238676	0.00227848
S100A4	0.453656	0.27159	0.757774	0.00326132	0.00238863	0.00253118
DHX34	1.65832	1.20806	2.2764	0.0055504	0.00239346	0.00175168
C1orf56	1.76096	1.22683	2.52764	0.00676293	0.00239816	0.00215083
C8orf55	0.481572	0.306172	0.757455	0.00362367	0.00239965	0.00156631
RBMXL1	0.506863	0.326654	0.78649	0.00342713	0.00240008	0.00243406
CDK6	1.43868	1.1414	1.8134	0.00178695	0.00242257	0.00207154
BBS4	0.341086	0.170173	0.683656	0.00342556	0.00243067	0.00242978
PDPN	1.28895	1.09067	1.52328	0.00771193	0.00243175	0.00289864
TRAF3IP2	0.430654	0.249272	0.744019	0.00319993	0.00243274	0.00252847
FLRT2	1.13723	1.04353	1.23934	0.0128144	0.00243358	0.00337502
PGM1	0.425852	0.247358	0.733148	0.00298495	0.00243458	0.00207098
LOC100132790	0.542768	0.366699	0.803376	0.00243895	0.00243936	0.00225653
CD46	0.621834	0.458015	0.844245	0.00286134	0.00244302	0.00232495
IL7	0.598318	0.428842	0.834768	0.00308316	0.00244571	0.00250415
ZNF32	0.40334	0.224457	0.724786	0.00331098	0.00244891	0.00239454
OR8D1	1.47803	1.14527	1.90748	0.00495901	0.00245183	0.00268025
IER2	2.15949	1.32163	3.52851	0.00338295	0.0024567	0.00211835
WDR63	1.29233	1.09346	1.52737	0.00500008	0.00245883	0.00263077
EFS	1.31693	1.0994	1.57749	0.00401264	0.00246549	0.00280071
SLC15A3	0.424719	0.246138	0.732865	0.00340027	0.00246901	0.002094
TMEM173	0.430421	0.250319	0.740106	0.0034168	0.00247427	0.0023019
ITIH5	0.801764	0.694394	0.925737	0.00320355	0.00248048	0.00259636
LOC158863	0.712805	0.571836	0.888526	0.00303316	0.00250151	0.00260205
SLC47A1	0.748677	0.621059	0.902518	0.00800245	0.00251177	0.00240011
FAM184A	1.47718	1.14629	1.90358	0.00482671	0.00251235	0.00256898
NLK	0.318045	0.151038	0.669716	0.00263925	0.00251402	0.00256856
PDIA6	2.97868	1.47526	6.0142	0.00191033	0.00251787	0.00232996
FLJ32063	1.69306	1.17987	2.42946	0.0195619	0.00252227	0.00426766
SIGLEC6	0.709101	0.567646	0.885806	0.00368768	0.00252661	0.00246092
LRRC8E	1.41678	1.12939	1.77729	0.00737521	0.00253252	0.00259611
IL1RAP	1.95529	1.2651	3.02202	0.00235413	0.00253368	0.00253985
SLFNL1	1.29914	1.09336	1.54364	0.00606797	0.00253923	0.00293608
MLC1	1.27273	1.08753	1.48948	0.00789047	0.00254301	0.00264932
CLCN1	0.651901	0.494852	0.858792	0.003842	0.00254361	0.00234681
ZNF880	0.450512	0.268041	0.757201	0.00354102	0.00254596	0.00261426
TMEM25	1.3569	1.11285	1.65446	0.00558624	0.00256106	0.00255379
GPATCH2	0.544263	0.367303	0.806478	0.00324263	0.00256648	0.00242991
YPEL3	1.19832	1.06495	1.34839	0.00647376	0.00257816	0.00265321
NPDC1	1.40437	1.1304	1.74475	0.00341065	0.00259059	0.00216273
GPR35	1.74438	1.21888	2.49644	0.00430124	0.00259259	0.00234872
DKFZP434L187	1.17124	1.04918	1.30751	0.0209984	0.00260886	0.00487799
LMBRD2	0.614465	0.447489	0.843747	0.00307358	0.00261443	0.00261148
C14orf34	1.28459	1.09019	1.51365	0.00230413	0.0026327	0.00277735
FAF1	0.255269	0.105727	0.616325	0.00292363	0.00263407	0.00239644
ZNF595	0.570488	0.398692	0.816311	0.00174208	0.00266339	0.00213932
MICALL1	1.45468	1.14182	1.85325	0.00395335	0.00266517	0.00241797
HLA-A	0.266285	0.111905	0.633643	0.00260917	0.00266642	0.00277594
HNRNPA3	3.23978	1.54764	6.78206	0.000920432	0.0026735	0.00181706
NKG7	1.25794	1.08406	1.4597	0.00411569	0.00267588	0.00249942
SLC12A8	1.17007	1.05677	1.29553	0.00680279	0.002678	0.00250748
DENND5A	0.34093	0.168618	0.689327	0.00260953	0.00267869	0.00273832
LRRC25	2.20071	1.31685	3.67781	0.00244616	0.00268843	0.00260867
RBM11	0.689442	0.539332	0.881331	0.00196262	0.00268895	0.00299499
HBQ1	1.17978	1.05823	1.3153	0.00813589	0.00269005	0.00288075
S100A8	1.6431	1.19234	2.26427	0.0055382	0.00270536	0.00240363
FAM46B	1.19976	1.06322	1.35384	0.0122278	0.00270602	0.00313359
TAX1BP1	0.454935	0.272417	0.759739	0.00278005	0.00271795	0.00261113
RHBDD2	0.593369	0.42117	0.835973	0.00631904	0.00272432	0.00284161
UNG	0.325414	0.156296	0.677522	0.00185949	0.00272673	0.00269573
CLEC10A	1.55361	1.16367	2.07423	0.00280524	0.00273027	0.00280876
PSCA	1.24476	1.08039	1.43412	0.00376903	0.00273354	0.00244445
TAGLN	0.55943	0.382478	0.818248	0.00228405	0.0027388	0.00275438
PRRT4	0.774292	0.654333	0.916242	0.00387025	0.00274004	0.00289691
GPR116	1.18627	1.05793	1.33018	0.00759141	0.00274395	0.00345745
CHDH	0.76067	0.635161	0.910979	0.0105327	0.00275505	0.00294555
TRIM24	1.52376	1.15668	2.00735	0.00437497	0.00276183	0.00274491
HSPG2	1.37439	1.11986	1.68677	0.00238139	0.00276957	0.00233999
EXOG	0.49839	0.327186	0.759181	0.00126984	0.00277275	0.00118252
ASPHD2	0.530024	0.354004	0.793566	0.00205751	0.00278213	0.00205087
ZMIZ1	2.23077	1.31568	3.78233	0.00185253	0.00278717	0.00289767
ZMYM6NB	0.505297	0.337311	0.756942	0.00102693	0.00279387	0.000931457
MON2	0.624835	0.460296	0.848191	0.00548259	0.00279533	0.00256236
NDUFS6	4.871	1.74167	13.6229	0.0020591	0.00280656	0.00254995
HMHA1	1.55675	1.16756	2.07566	0.00544287	0.00280743	0.00256619
MURC	0.779267	0.660994	0.918702	0.00238542	0.0028098	0.00298201
LOC644962	0.463135	0.281757	0.761271	0.00314347	0.00281311	0.00239977
TUBA8	1.34119	1.10447	1.62865	0.00663737	0.00283816	0.00304855
SDC2	1.54401	1.15766	2.05929	0.00390697	0.00283876	0.00311294
CD7	1.22669	1.07326	1.40205	0.00407088	0.00284172	0.0027258
C17orf46	0.585465	0.417084	0.821825	0.00170991	0.00284327	0.00197427
SOAT1	2.26427	1.32697	3.86366	0.00272476	0.00285045	0.00272128
EDN2	1.31006	1.0879	1.57759	0.0166034	0.0028511	0.00439194
KEL	1.26542	1.08	1.48268	0.00987611	0.00285858	0.0035919
MAP2K5	0.530958	0.350356	0.804656	0.00510598	0.00286549	0.00283936
BTD	0.610529	0.44438	0.838801	0.00426964	0.00287414	0.00233
LOC642648	0.609876	0.44201	0.841492	0.00444102	0.00287587	0.00260665
C20orf196	0.473374	0.28828	0.777309	0.00419775	0.00287613	0.00312145
STAMBP	0.402938	0.22486	0.722045	0.00263296	0.00289633	0.00225634
MGST3	0.42318	0.241853	0.740456	0.00723679	0.00289844	0.00258973
GPATCH4	1.32945	1.10352	1.60164	0.0102421	0.00289948	0.00273071
RAB8A	0.270493	0.1146	0.63845	0.00310912	0.0029	0.00284487
GNAO1	0.720659	0.582679	0.891311	0.00257448	0.00291445	0.00251878
VTN	0.676036	0.523299	0.873355	0.0034737	0.00292037	0.00273259
TLR10	1.29465	1.09031	1.53728	0.00796754	0.002921	0.00321395
MT1L	1.8412	1.23538	2.7441	0.00365843	0.00292468	0.00271601
RAB17	1.35995	1.11173	1.6636	0.00287003	0.00292606	0.00278963
LOC100130913	0.631946	0.474985	0.840777	0.00105361	0.00293938	0.00163008
CTPS2	0.385317	0.205665	0.721897	0.00495379	0.00295229	0.00290803
RNF145	1.64613	1.19181	2.27364	0.00535394	0.00295515	0.00248705
TMEM191A	0.376518	0.197413	0.718119	0.00284817	0.00295708	0.00302587
SERPINB9	1.35058	1.11342	1.63825	0.00234153	0.00295767	0.00228478
ZNF737	0.658428	0.502054	0.863509	0.00194078	0.00296221	0.00252161
FLJ44674	1.1913	1.05357	1.34703	0.0198887	0.00296696	0.00523118
SLITRK4	0.716148	0.573914	0.893631	0.00418992	0.00296862	0.00312149
HAL	1.27058	1.08235	1.49155	0.00812288	0.00297422	0.00341906
FOXM1	1.42032	1.14203	1.76643	0.00250087	0.00298421	0.001613
SLC22A16	1.28346	1.08796	1.51409	0.00326791	0.00298736	0.00307761
OR4M1	1.22957	1.06893	1.41435	0.0086554	0.00299901	0.00381518
PGAM5	1.38548	1.11818	1.71668	0.00654146	0.00299955	0.00286964
LRFN3	1.22852	1.07294	1.40666	0.00556277	0.00300043	0.0028916
SAG	1.39441	1.11567	1.7428	0.0063229	0.00301197	0.00347967
FBXL17	0.5849	0.410651	0.833087	0.00250953	0.00301203	0.00295949
LOC100132207	0.59733	0.426469	0.836646	0.00477685	0.00301305	0.0027223
TSPAN3	0.557382	0.379723	0.818162	0.00529504	0.00303308	0.00283729
CDK5R2	0.69807	0.551676	0.883313	0.00363864	0.00303946	0.00276057
NDUFAB1	4.59792	1.66701	12.6819	0.00318568	0.00304066	0.00320691
ARF3	0.404804	0.221665	0.739253	0.00379523	0.00304955	0.00324852
CSGALNACT1	1.27948	1.08734	1.50557	0.00323906	0.00305131	0.00299193
FAM182B	1.24767	1.07374	1.44977	0.00980677	0.00305306	0.00386618
LARP1B	1.28339	1.09032	1.51064	0.0103333	0.00305987	0.00270398
FOLR2	1.58723	1.16724	2.15835	0.00272299	0.00306071	0.003218
NS3BP	1.21078	1.07025	1.36975	0.00492626	0.00306098	0.00237637
FAM24B	0.613092	0.443068	0.84836	0.00394981	0.00306193	0.00315372
DUSP6	1.38903	1.11905	1.72414	0.00738974	0.0030643	0.00288248
THOC1	0.623137	0.455542	0.852392	0.00329003	0.00306618	0.00308496
CHTF8	0.494858	0.311688	0.785671	0.00427965	0.00307636	0.00285722
HDAC5	0.436773	0.252494	0.755547	0.00461019	0.00307847	0.00305179
CCL26	1.21929	1.06921	1.39044	0.00574444	0.00308399	0.00309201
SYNGR1	0.689106	0.537778	0.883016	0.00326618	0.00309562	0.00324621
TMEM19	0.372806	0.194092	0.716074	0.00321806	0.00311898	0.00304863
FLJ31713	0.667008	0.51111	0.870457	0.00504419	0.00311973	0.0028695
ZNF502	0.563289	0.384652	0.824886	0.00377082	0.00312213	0.00318693
CYP11B1	1.3803	1.1101	1.71627	0.00775067	0.0031227	0.00373558
SNHG9	1.78429	1.22276	2.6037	0.00429162	0.00313398	0.00267326
EPS8L2	1.32611	1.09874	1.60052	0.00590592	0.00314668	0.00326909
DMBT1	1.18738	1.05812	1.33244	0.00624128	0.00315026	0.00349441
NLRC4	0.367691	0.188809	0.716052	0.00380233	0.0031547	0.00325947
PSAT1	1.60846	1.18327	2.18645	0.00154189	0.00316411	0.00241096
HTR7	2.2256	1.31759	3.75935	0.00200332	0.00316475	0.00277932
DPYSL2	0.418651	0.23446	0.747541	0.00378891	0.00317646	0.00324388
FMO1	0.711175	0.568439	0.889753	0.00386275	0.00317781	0.00286433
SLC41A2	1.63033	1.19365	2.22677	0.00333656	0.0032239	0.00212064
PPP1R7	0.198531	0.0671737	0.586753	0.00327948	0.00323764	0.00345289
LANCL3	0.509841	0.325796	0.797854	0.00349727	0.00324614	0.00319496
GPD1	0.778227	0.659944	0.917711	0.00913808	0.00325879	0.00287444
UQCRFS1	7.53232	1.96609	28.8572	0.00246045	0.0032613	0.00321425
GLCE	0.675145	0.519154	0.878007	0.00564513	0.0032845	0.00338388
RAPGEF3	0.636475	0.477344	0.848654	0.00391481	0.00328859	0.0020847
TANC2	0.616625	0.44718	0.850276	0.00659187	0.00329295	0.0031843
SLC35A5	0.591354	0.418488	0.835627	0.00365264	0.00329886	0.00290264
UGT3A1	0.598007	0.426091	0.839286	0.00321052	0.00329906	0.0029483
LOC100507747	0.473618	0.28761	0.779922	0.00306537	0.0033007	0.00331762
PFKFB2	0.579478	0.405253	0.828606	0.00405913	0.00330271	0.00278627
CFH	1.37758	1.11214	1.70637	0.00328848	0.00330674	0.00335463
AKR1E2	0.723056	0.581354	0.899297	0.00554223	0.00330807	0.00357182
LOC100129322	1.3145	1.10131	1.56896	0.00485968	0.0033185	0.00245486
FAM92A1	0.7084	0.562538	0.892084	0.0108842	0.00332145	0.0033813
R3HDML	0.497932	0.310502	0.7985	0.00182849	0.00332831	0.00380593
SPG20	0.63366	0.466653	0.860437	0.00475857	0.00335302	0.00346705
RABGGTA	0.564447	0.386262	0.824829	0.00502862	0.00336675	0.00312662
EDNRB	1.19569	1.05877	1.35032	0.00836395	0.00336718	0.0039736
SYNC	0.668148	0.510873	0.87384	0.0110005	0.00337553	0.00323167
UBE2R2	0.469898	0.284153	0.77706	0.00372185	0.00337768	0.00325243
WDR44	0.574124	0.400179	0.823678	0.00705052	0.0033985	0.00258422
METTL14	0.529233	0.348692	0.803251	0.00593386	0.00341148	0.0027978
SEMA4C	1.41784	1.12321	1.78976	0.00749953	0.00341372	0.003308
TTC39B	0.579672	0.402566	0.834693	0.00277965	0.00341481	0.00337558
SLC7A5	1.34997	1.10502	1.64921	0.00213434	0.00341641	0.00330862
NANOG	0.743303	0.608236	0.908363	0.00346479	0.00341831	0.00374001
PYGB	0.525426	0.357423	0.772397	0.0016046	0.00342206	0.00106144
TNKS1BP1	1.2312	1.07218	1.4138	0.00556124	0.00342233	0.00320206
PRDM2	1.29513	1.09632	1.52998	0.00992774	0.00342519	0.0023535
ZNF610	0.723055	0.58121	0.899517	0.00509431	0.00343337	0.00360943
EFR3B	1.32935	1.09719	1.61064	0.00574562	0.00343525	0.00364872
UBXN8	2.42931	1.33612	4.41693	0.00304283	0.00344754	0.00361493
ROGDI	0.565693	0.387648	0.825512	0.00339177	0.00344996	0.00313343
H2AFB2	0.607843	0.435847	0.847712	0.00400712	0.0034698	0.00335193
GLTSCR1	0.610348	0.438757	0.849044	0.0031592	0.00347128	0.00337168
SDC4	1.35547	1.10698	1.65974	0.00712045	0.00347673	0.00324448
PDXK	2.37981	1.38319	4.09454	0.00320726	0.00349456	0.00173828
PFKFB3	1.7812	1.20869	2.62489	0.0044082	0.00349628	0.00352279
ICA1L	0.717032	0.574417	0.895055	0.00337202	0.0034989	0.00328378
ZFP30	0.577021	0.398325	0.835882	0.00492138	0.00350157	0.00363724
HLA-DRA	0.502821	0.318786	0.793099	0.00614811	0.0035233	0.00310715
AMDHD1	1.32136	1.09444	1.59533	0.00389997	0.00352711	0.0037479
TREM1	0.643633	0.480147	0.862784	0.0102414	0.00352903	0.00320743
MANF	2.42336	1.33413	4.40186	0.00333846	0.00353111	0.00365382
RASGRF1	1.22806	1.06889	1.41094	0.0101593	0.00353311	0.00372558
EIF4E	1.7111	1.19582	2.44841	0.00705986	0.00353469	0.00330135
GLIPR1L1	1.22188	1.06283	1.40472	0.0160548	0.00353733	0.00485631
ZNF626	0.516189	0.331789	0.803074	0.00149199	0.00354388	0.00336242
CHI3L1	1.21074	1.06519	1.37618	0.00423541	0.00354519	0.00343032
LOC339529	0.663298	0.502212	0.876051	0.00234149	0.00354545	0.00382493
TEP1	2.67271	1.38096	5.17275	0.00294188	0.00355259	0.00352227
GNAT1	1.38295	1.10365	1.73293	0.0143444	0.00355761	0.00485033
HPSE	1.8307	1.2215	2.74373	0.00366726	0.00356334	0.00339903
TSPAN5	1.29112	1.08668	1.53402	0.00396181	0.00357356	0.00367144
CTBS	0.443104	0.255603	0.768149	0.00343616	0.00359502	0.00373612
ETHE1	0.505449	0.322012	0.793382	0.00352049	0.0035954	0.00301583
DNAH9	1.1897	1.05612	1.34017	0.00805419	0.00360823	0.00425681
IRF8	0.364361	0.185333	0.716326	0.00268037	0.00362368	0.00341966
STX19	1.2892	1.08625	1.53006	0.00844629	0.00362853	0.00365368
C10orf10	1.24404	1.07527	1.43929	0.00619727	0.00364162	0.0033282
KBTBD7	0.501416	0.314786	0.798694	0.00499431	0.00364616	0.00365743
CABLES1	0.720055	0.575921	0.900261	0.0139715	0.00365501	0.00395212
CREG1	2.70492	1.40245	5.21701	0.0029028	0.00365652	0.00298612
LOC100131262	1.27935	1.09	1.50159	0.00761298	0.0036632	0.00257381
LOC283352	0.464125	0.276994	0.777678	0.00457411	0.00366877	0.00355983
PRKCA	1.73247	1.20734	2.48599	0.00227634	0.00367823	0.00285816
DOK4	1.28462	1.08291	1.5239	0.0115639	0.00368865	0.00405417
GCH1	1.83334	1.22491	2.74399	0.00319939	0.00369891	0.0032201
OLFM4	1.21864	1.05483	1.40789	0.0286821	0.00370694	0.00725929
CCDC88C	1.26787	1.08152	1.48633	0.00425693	0.00370736	0.00343175
LOC100240735	0.770268	0.644959	0.919922	0.00649899	0.00371718	0.00395994
C12orf24	1.28577	1.08645	1.52165	0.0082398	0.0037351	0.00344667
HEXIM2	0.558221	0.388792	0.801482	0.00115202	0.00374882	0.00158277
SH3BGRL	0.463217	0.275298	0.77941	0.00399454	0.00375044	0.00374724
SOBP	0.758012	0.631768	0.909483	0.00320997	0.00375925	0.00287573
OR1E1	0.694468	0.543101	0.888024	0.00906448	0.0037679	0.00365253
HIVEP3	1.47905	1.13368	1.92963	0.00323194	0.00376808	0.00391794
PODXL2	0.696591	0.548083	0.885337	0.0039594	0.00377997	0.00312176
TAGAP	1.90124	1.23782	2.92022	0.00508587	0.00378318	0.00334242
C20orf108	0.37329	0.191055	0.729346	0.00432587	0.0037904	0.00393285
TNFRSF21	1.68405	1.18647	2.3903	0.00310183	0.00379388	0.00353557
SLC35E3	0.444772	0.257463	0.768351	0.00484047	0.00379947	0.00367618
NDST2	2.33629	1.32544	4.11805	0.00358116	0.00380213	0.00334413
ADA	1.50024	1.14066	1.97317	0.00518578	0.00380396	0.00371607
C3orf62	0.570926	0.398759	0.817427	0.00226292	0.0038098	0.00220698
BNC2	1.43965	1.12218	1.84692	0.00627303	0.00381782	0.00414554
ASCL2	1.3886	1.11124	1.73518	0.00541408	0.00382012	0.00388004
ITGAE	0.570721	0.393132	0.828531	0.00322734	0.00382707	0.00318794
RBX1	0.326318	0.15249	0.698302	0.00457288	0.00382959	0.00391278
ITGB8	0.748043	0.61425	0.910977	0.00633796	0.00383316	0.00388546
TGFBR2	0.350694	0.172345	0.713608	0.00439105	0.00384071	0.00384174
JMJD7	0.491002	0.30375	0.793689	0.00445221	0.00384952	0.00369635
LOC286190	1.28844	1.08084	1.53592	0.0103173	0.00385197	0.00469671
ABCC6	1.59873	1.17152	2.18171	0.00383942	0.00386099	0.0030972
CAMSAP1	0.635766	0.478462	0.844785	0.00232591	0.0038673	0.00179023
RAB2B	0.577607	0.40126	0.831455	0.0052171	0.0038683	0.00314652
USP27X	0.601791	0.426605	0.848918	0.00754317	0.00387838	0.00381525
NPR2	0.583159	0.405435	0.838789	0.00403502	0.00387914	0.00363926
FAM66D	0.543121	0.364718	0.808788	0.00215194	0.0038804	0.00266021
MMP19	1.60859	1.20137	2.15385	0.0034457	0.00388711	0.00141365
ZKSCAN3	0.544832	0.381125	0.778856	0.000564313	0.00389043	0.000866108
PODXL	1.47959	1.13575	1.92751	0.00448487	0.00389723	0.00369221
CENPQ	0.529146	0.343575	0.814949	0.00326868	0.0039058	0.00386889
ISOC1	0.293413	0.128245	0.671303	0.00358888	0.00392642	0.00368723
POGZ	0.529991	0.35199	0.798009	0.00212549	0.00393769	0.0023615
PHLDA1	1.20222	1.06335	1.35922	0.00845408	0.0039423	0.00327275
HYI	0.41509	0.228472	0.754142	0.00624111	0.00395103	0.00389902
GLTSCR2	0.386485	0.202237	0.738591	0.00376905	0.00395309	0.00401532
TSPAN8	1.26683	1.07678	1.49043	0.00754485	0.00396045	0.00434489
FOLR1	0.737078	0.599235	0.906629	0.0107492	0.00396794	0.00387819
NFU1	0.405939	0.22533	0.731309	0.00187905	0.00398194	0.00268314
EIF6	0.329785	0.156544	0.694744	0.00358197	0.00399222	0.00352277
RHOB	0.562881	0.379801	0.834212	0.00339832	0.00401321	0.00419635
EVI2B	0.592935	0.414226	0.848743	0.00356988	0.00401628	0.00428828
PEX16	0.3007	0.132823	0.680761	0.00429158	0.00402243	0.00394699
UAP1L1	1.8563	1.2201	2.82423	0.00313581	0.00403846	0.00386364
FBXL22	1.17008	1.05237	1.30095	0.00964802	0.00405455	0.00368943
SOS1	0.621763	0.450099	0.858897	0.00567622	0.00405714	0.00394295
SLC38A7	1.91215	1.22725	2.97929	0.00474175	0.00407846	0.00416983
GTF3C5	0.32515	0.152065	0.695249	0.00504361	0.00408331	0.00376297
METTL7A	1.60497	1.16528	2.21058	0.00599586	0.00408603	0.00377456
TAS2R20	1.49456	1.13254	1.97229	0.0103487	0.00408829	0.00451912
PDCD1	1.22139	1.0668	1.39838	0.0100253	0.00409171	0.00377277
FAM135A	0.723978	0.581113	0.901966	0.00570506	0.00409946	0.00397747
SLC6A13	1.20095	1.05891	1.36204	0.00807878	0.00409988	0.00435508
MOSPD1	0.555456	0.371917	0.829571	0.00599055	0.00410163	0.00406666
FAM71A	1.41129	1.11532	1.78581	0.00794384	0.00411281	0.00412004
RALGDS	2.09873	1.26568	3.48008	0.00336195	0.00411738	0.0040648
PSEN2	0.513845	0.326985	0.807489	0.01094	0.00412838	0.00388758
DUSP14	1.54338	1.15151	2.06862	0.00216374	0.00413923	0.00368493
GCC2	0.601249	0.423819	0.85296	0.00357198	0.00413991	0.00435346
KBTBD10	1.25026	1.07428	1.45506	0.00653225	0.0041449	0.0039055
DNAJB13	1.28154	1.08212	1.51771	0.00790697	0.0041509	0.00404758
HLX	1.20309	1.06218	1.36269	0.00755981	0.0041542	0.0036243
ZBED2	1.19531	1.0589	1.34929	0.00920586	0.004155	0.00390668
MIF	3.30584	1.45952	7.48782	0.0046715	0.00415875	0.00415198
ATP2A2	2.30777	1.30012	4.0964	0.00265072	0.00415905	0.00428479
THBS3	1.62321	1.16584	2.26001	0.00569879	0.00416389	0.00412202
SCIN	1.24106	1.06964	1.43996	0.00870946	0.0041641	0.00440468
SCOC	0.549925	0.364868	0.828842	0.00468407	0.00416555	0.00427898
C9orf93	0.714681	0.567226	0.900468	0.00605634	0.00416659	0.00438293
CTSA	2.37273	1.31047	4.29606	0.00374945	0.00418258	0.00433564
JARID2	2.28168	1.31229	3.96715	0.00434989	0.00418498	0.00346727
RPGRIP1	0.67415	0.513527	0.885013	0.0058109	0.00418747	0.00451588
PACSIN2	2.26114	1.30077	3.93058	0.00404577	0.00419243	0.00382706
C1orf172	1.36467	1.10152	1.69069	0.00507889	0.00419338	0.00444715
TMEM175	0.466008	0.276277	0.786036	0.00531976	0.00419534	0.00420255
UNC5B	0.812192	0.701027	0.940986	0.0199428	0.00420169	0.0056069
FIBCD1	0.611618	0.438114	0.853833	0.0054604	0.00421903	0.00387348
CELA2A	0.7966	0.684156	0.927525	0.00408643	0.00422082	0.00340029
GCHFR	0.652504	0.485063	0.877743	0.0167473	0.00422412	0.00477476
RAP2B	1.84691	1.21917	2.79788	0.00306303	0.00422987	0.00379018
MT1A	1.97561	1.24008	3.14741	0.00680347	0.00423896	0.00416257
ABHD4	0.453722	0.264452	0.778454	0.00448792	0.00424239	0.0041143
DUSP12	3.02254	1.42399	6.41558	0.00360978	0.00426002	0.00397122
TIMM8B	3.37036	1.45697	7.79653	0.00490711	0.00426083	0.00451798
HDDC2	0.411282	0.224337	0.754013	0.00398642	0.00426456	0.00406664
TBCK	0.542626	0.358254	0.821884	0.00695393	0.00426897	0.00390205
MT1G	1.39025	1.1163	1.73145	0.00485582	0.00427215	0.00325628
TP53TG3	0.6606	0.498475	0.875455	0.0066259	0.00429068	0.00390477
NCF1	0.563571	0.379135	0.837728	0.00419064	0.00429897	0.00457637
LMBR1	0.539177	0.353552	0.822261	0.0040913	0.0043094	0.00411974
SCARNA7	0.655946	0.491929	0.874649	0.00429498	0.00432026	0.00407562
CCDC50	0.422956	0.234577	0.762613	0.00370922	0.00432107	0.00422279
TMC5	1.29586	1.08413	1.54894	0.0046418	0.00432465	0.00440748
C10orf54	1.70456	1.18731	2.44717	0.00838238	0.00434135	0.00384644
ITGA10	1.36692	1.10738	1.68728	0.00505788	0.00434486	0.00362122
WHAMM	0.514597	0.325606	0.813282	0.00380507	0.00436346	0.00444098
ACOT4	0.660932	0.494846	0.882762	0.0171983	0.00437573	0.00503977
OSBPL10	0.691188	0.53726	0.889217	0.00508353	0.00437615	0.00406049
GNPNAT1	1.43708	1.1186	1.84623	0.00793557	0.00438019	0.00455711
ZFP112	0.743302	0.606467	0.91101	0.00870106	0.0044015	0.00426565
DENND1B	0.642675	0.47363	0.872055	0.00452759	0.004408	0.00452411
ITGA6	1.21228	1.06612	1.37849	0.00696411	0.00441456	0.00331844
PNPT1	1.8013	1.20981	2.68199	0.00742442	0.00442049	0.00375809
JAG1	1.61373	1.16427	2.2367	0.00438664	0.00442376	0.00406477
COMT	0.491921	0.30208	0.801067	0.00664534	0.00442473	0.00435123
TRERF1	1.38105	1.10505	1.726	0.00489024	0.00444356	0.0045393
2023-09-11	0.627897	0.455163	0.866182	0.00736127	0.00445697	0.00458025
THEM5	1.17203	1.04848	1.31014	0.0116575	0.00448431	0.00522386
PTPRN2	1.31751	1.08876	1.59433	0.005164	0.0045016	0.00459744
C17orf99	0.753201	0.619528	0.915715	0.00579329	0.00450693	0.00446539
NAB2	1.9487	1.22629	3.09669	0.00474854	0.00453806	0.00475489
PIK3R6	1.27129	1.08392	1.49104	0.00783438	0.00453978	0.00317201
PHOSPHO1	1.76566	1.19897	2.6002	0.00652168	0.00454448	0.00399169
SLC5A12	1.43883	1.12061	1.84741	0.00435392	0.00454604	0.00433275
SCNN1A	1.4823	1.13099	1.94273	0.00524036	0.00455704	0.00434664
P4HB	4.62831	1.61644	13.2521	0.00376792	0.00457162	0.00430784
BNIP3	1.58404	1.15589	2.17078	0.00244795	0.00457375	0.00422223
OSBPL7	1.42116	1.11837	1.80592	0.00459318	0.00459063	0.00403893
ANGEL1	0.582013	0.399924	0.847009	0.00694969	0.00459387	0.0046942
MAGED4B	1.18839	1.05226	1.34213	0.0100443	0.0045956	0.00542583
TRIM2	1.38458	1.10068	1.7417	0.011947	0.00459994	0.00544713
LOC100129869	1.31977	1.08808	1.60078	0.0106016	0.00460065	0.0048466
NGB	0.605948	0.436007	0.842125	0.00070114	0.0046033	0.00285274
CYP27A1	0.561618	0.375853	0.839199	0.0156393	0.00461198	0.00487045
FAM115A	0.572366	0.390828	0.838228	0.004193	0.00461493	0.00414999
LOC100505719	0.697986	0.543533	0.896329	0.00908645	0.00463497	0.00483769
CDH5	0.600003	0.423704	0.84966	0.00600135	0.00463803	0.00400465
LOC728208	0.656461	0.489929	0.879598	0.00381527	0.00463948	0.00481285
NCK1	0.436619	0.245328	0.777064	0.00468893	0.00464137	0.00483914
CDRT7	1.32172	1.08145	1.61536	0.0249669	0.00465438	0.00643108
CNST	0.492792	0.302498	0.802794	0.00395909	0.00465707	0.00448096
PLXNA1	1.65766	1.17107	2.34644	0.00366526	0.00466962	0.00436295
MSTO1	1.77197	1.19174	2.63471	0.0074638	0.00467821	0.00470339
PRPH	0.733674	0.593234	0.90736	0.00567177	0.00468149	0.00428038
WTIP	1.2615	1.0768	1.47787	0.00692163	0.0046825	0.00402548
SLC24A3	1.31839	1.08842	1.59694	0.00457117	0.00468287	0.0047083
ZBTB8A	0.719355	0.57347	0.902352	0.0144616	0.00468736	0.00439251
SCML1	0.689153	0.535579	0.886763	0.00424459	0.00470657	0.00380079
C8orf60	1.60233	1.16006	2.21323	0.00603547	0.00471232	0.00422407
LTBP4	0.426732	0.236887	0.768722	0.00549738	0.00472526	0.00457042
S100A9	1.82547	1.20741	2.75992	0.00945469	0.00474057	0.00432223
GPR176	0.711075	0.562523	0.898858	0.00524382	0.00474119	0.00434774
SMC6	0.602553	0.422985	0.858352	0.00549101	0.00474644	0.00501579
GZMB	1.22502	1.06346	1.41113	0.00558119	0.00475346	0.00491479
DEAF1	2.11592	1.26844	3.52963	0.00517852	0.00475409	0.00409487
FSTL1	1.37325	1.10452	1.70736	0.00481201	0.00475955	0.0043085
SLC25A13	3.17625	1.43058	7.0521	0.00258946	0.00476035	0.00451343
ARID4A	0.703035	0.555747	0.889359	0.00188495	0.00476708	0.00330866
TRIM4	0.440575	0.249352	0.778443	0.00603913	0.00476808	0.00476712
GRID1	1.15923	1.0424	1.28916	0.0205303	0.00479186	0.00640932
LGALS8	2.81199	1.37785	5.73887	0.00294963	0.00479287	0.00450308
ATXN8	0.691613	0.53666	0.891306	0.00908454	0.00479421	0.004385
KRT10	1.90532	1.21627	2.98473	0.00463265	0.00480965	0.00487971
SPSB1	1.66722	1.17525	2.36514	0.00471144	0.00481064	0.00416907
RPS2	4.12675	1.53553	11.0907	0.00519914	0.00481948	0.00495066
NR2C1	0.574738	0.392366	0.841878	0.00348318	0.00482497	0.00445892
MBOAT2	1.18728	1.05045	1.34193	0.0149597	0.00483227	0.0060012
PLK1	1.43151	1.1178	1.83326	0.00487552	0.00483356	0.00447824
IGJ	1.15523	1.04341	1.27903	0.0135905	0.00484002	0.00546719
CDH15	1.30015	1.0798	1.56546	0.0124283	0.00484081	0.00560185
CWC22	0.592005	0.417138	0.840177	0.00195276	0.00484578	0.00333687
MAGEE1	0.667171	0.50478	0.881805	0.00833383	0.00487602	0.00445743
ARMCX2	0.579499	0.396459	0.847047	0.00731737	0.00488377	0.00484631
PPP2R5A	0.419381	0.230382	0.763431	0.00465426	0.00489319	0.00446719
MDK	0.68132	0.52279	0.887922	0.00587119	0.0048947	0.00451648
ROS1	1.20111	1.05424	1.36844	0.0130745	0.00490376	0.00589317
FAM26F	1.33193	1.09207	1.62447	0.00619451	0.00490824	0.00466479
SMAD6	0.707433	0.559005	0.895272	0.00979978	0.00491772	0.00396749
KLHDC9	0.711643	0.562126	0.90093	0.00658854	0.00491957	0.00469938
TSR1	1.3464	1.09522	1.65519	0.0168079	0.00492533	0.0047533
MUC22	1.16659	1.04552	1.30168	0.0129638	0.00493169	0.00584738
DCHS2	0.664893	0.504042	0.877075	0.00417985	0.00494749	0.0038752
CPAMD8	0.627346	0.454739	0.86547	0.00457849	0.00494848	0.00451105
C17orf87	0.41726	0.226356	0.769169	0.00654481	0.00495188	0.00509433
HOPX	1.22758	1.06425	1.41597	0.00535706	0.00495291	0.00488127
SBDS	0.551419	0.364403	0.834414	0.00543408	0.004957	0.00485512
FKBP5	1.49669	1.12914	1.98387	0.00662061	0.0049639	0.00503603
PBX3	0.553955	0.369066	0.831468	0.00663989	0.00496555	0.00436234
UPK3B	0.723631	0.576373	0.908512	0.0118025	0.00497027	0.00532848
PA2G4	3.51907	1.50176	8.24622	0.00268045	0.00497127	0.00378075
CRY1	0.681092	0.520994	0.890387	0.0081869	0.00498845	0.004967
GPR132	1.4467	1.12151	1.8662	0.00771147	0.00498854	0.00447365
FRMD4B	1.86481	1.20825	2.87815	0.00443374	0.00499231	0.00488852
IL6	1.2403	1.06676	1.44207	0.00463379	0.0049972	0.00510603
CDCA3	1.83357	1.20525	2.78943	0.00503148	0.0049982	0.00462515
KRTAP4-2	0.627591	0.452056	0.871286	0.00353822	0.00500256	0.00538437
POLR1E	0.598585	0.417269	0.858688	0.0082482	0.00502081	0.00531194
ADAMTS9	1.58099	1.1397	2.19314	0.0133023	0.00504414	0.00608646
CYP20A1	2.22948	1.26781	3.92061	0.00289651	0.00507013	0.00537127
INE2	1.27835	1.06826	1.52975	0.0231573	0.00507937	0.00734355
DHH	1.38863	1.09908	1.75447	0.0127267	0.00508394	0.00592724
CFHR3	1.32178	1.08648	1.60803	0.00550498	0.00511232	0.00528344
REEP5	0.492529	0.300128	0.808271	0.00479748	0.00512753	0.00507566
CACNA2D4	1.5424	1.14517	2.0774	0.00950311	0.00514839	0.00434231
LHX1	1.16174	1.04483	1.29172	0.0128909	0.00515661	0.00559823
TGFA	0.606117	0.42742	0.859523	0.00475401	0.00515874	0.0049642
PMP22	1.86186	1.23873	2.79846	0.00165714	0.00516974	0.00279254
SEMA7A	1.41026	1.10925	1.79294	0.00528752	0.00518663	0.0050094
PPIC	0.77743	0.649642	0.930355	0.0197048	0.00520018	0.00599812
PRR5L	1.40118	1.10961	1.76936	0.00402415	0.00520957	0.00460098
FBXO9	0.352105	0.169305	0.732275	0.00497991	0.00521533	0.00520563
C21orf88	0.528715	0.341854	0.817716	0.0047595	0.00521894	0.00417706
TMX2	3.85216	1.52191	9.75033	0.00425102	0.00522266	0.00442293
POU3F2	1.16187	1.03865	1.2997	0.0307197	0.00522524	0.00871789
TRIM59	1.54719	1.15371	2.07488	0.00312417	0.00522648	0.00355767
PRM2	0.684961	0.526293	0.891465	0.00559016	0.00524522	0.00488507
HILPDA	0.632114	0.45839	0.871677	0.00758212	0.00525752	0.00514835
RASAL3	1.35733	1.09528	1.68208	0.0128191	0.00526215	0.00524646
CDKL5	0.58217	0.406074	0.83463	0.0036665	0.0052633	0.00324525
RFC4	1.83752	1.20176	2.80961	0.00666715	0.00526572	0.00498103
CRHBP	1.31913	1.08241	1.60762	0.0101611	0.00530023	0.00605675
GCLC	1.40909	1.10913	1.79017	0.0113736	0.00531566	0.00498452
NUMB	3.37715	1.44534	7.89094	0.00593895	0.00531687	0.00494444
SRD5A2	1.20205	1.05402	1.37086	0.0119173	0.00531948	0.0060572
NEDD4L	1.36811	1.09825	1.70429	0.00575755	0.00532988	0.00517445
PPAP2A	0.611242	0.434301	0.860272	0.00534639	0.00533594	0.00475585
C8G	0.645861	0.484327	0.86127	0.00142635	0.00534041	0.00291127
SEMA3C	0.707908	0.556891	0.899878	0.0103384	0.00534101	0.00477697
REEP3	0.645393	0.476806	0.873588	0.0053423	0.00534234	0.00458419
NDE1	2.09325	1.24391	3.5225	0.00795792	0.00540065	0.00540392
SLC16A7	1.30609	1.08241	1.576	0.00802134	0.00540188	0.00533354
KIAA1804	0.539286	0.349053	0.833196	0.00470727	0.00540626	0.00540015
SLC39A10	0.608789	0.430646	0.860623	0.00677687	0.00541124	0.00495772
SPNS1	0.549139	0.360285	0.836986	0.00656179	0.00541222	0.00531163
OSCAR	0.467489	0.274102	0.797316	0.00563014	0.00541592	0.0052463
RFTN1	1.99303	1.23782	3.209	0.00598183	0.00543589	0.00454128
C6orf108	1.28612	1.1052	1.49667	0.0066213	0.0054525	0.00114179
OR1D2	0.717745	0.567248	0.908169	0.00776196	0.00545884	0.0057404
CBR3	1.5868	1.1549	2.18023	0.00497337	0.00546347	0.00439448
ENO1	2.47896	1.31247	4.68221	0.00422193	0.00548182	0.00514214
ECH1	0.400072	0.210351	0.760907	0.00776068	0.00550196	0.00522176
TULP3	1.48405	1.12756	1.95323	0.0092068	0.00550657	0.00485459
PIPOX	0.628664	0.46564	0.848764	0.00156554	0.00551156	0.00244085
C1QL2	1.17945	1.04719	1.32841	0.0137421	0.00551829	0.0065314
ST5	0.71915	0.570164	0.907065	0.0118526	0.00552147	0.00537774
LOC284373	0.376945	0.18942	0.750118	0.00609449	0.00557149	0.00545429
NSL1	0.526016	0.336147	0.823129	0.00797284	0.0055724	0.00492456
ALKBH8	0.584223	0.400562	0.852095	0.00663233	0.00557833	0.00525193
PELI3	0.590989	0.417132	0.837308	0.00266406	0.00559386	0.00308755
PPIL6	1.3513	1.0934	1.67003	0.0134919	0.0056072	0.00532985
ZNF148	0.590795	0.406571	0.858494	0.00735173	0.00561015	0.00577727
BCAS3	0.550419	0.367144	0.825182	0.00426392	0.00561264	0.00385197
GDPD3	1.29655	1.07884	1.55819	0.00809864	0.00561741	0.00562031
ST8SIA4	1.34836	1.09233	1.66441	0.00551699	0.00562146	0.00540373
AGR2	1.2397	1.06444	1.44382	0.00653873	0.00562293	0.0057268
SDR42E1	1.19587	1.05171	1.35978	0.0110345	0.00563001	0.00634766
CTNS	1.78318	1.1869	2.67901	0.00461348	0.00563085	0.0053531
TNIP1	1.36324	1.09544	1.69652	0.0133785	0.00563669	0.00548866
LRRC41	0.53481	0.346212	0.826147	0.00569855	0.00564845	0.00479127
GRIK5	0.708089	0.553939	0.905136	0.00945711	0.00565432	0.00585772
PTGS2	1.37379	1.09862	1.71789	0.00560202	0.00566509	0.00535795
ZNF71	0.640429	0.466347	0.879495	0.00979119	0.00567236	0.00589866
WDR69	1.17278	1.04607	1.31484	0.0166132	0.00567998	0.0062934
FLJ43681	0.22271	0.0766257	0.647297	0.00488034	0.00570196	0.00579845
CYP2R1	2.52542	1.31585	4.84685	0.00413692	0.00571814	0.00534966
C17orf57	0.705829	0.550797	0.904498	0.00650349	0.00574301	0.00590126
KDR	1.34599	1.08588	1.66841	0.013338	0.00576716	0.00668927
TRAPPC6A	0.393746	0.20595	0.752785	0.00359914	0.00577688	0.00482053
STAT5A	0.469781	0.276333	0.798652	0.00600028	0.005782	0.00526495
ASTL	1.47888	1.12243	1.94851	0.00941042	0.00578509	0.00542269
FANCL	0.509564	0.316645	0.820022	0.00691278	0.00579139	0.00548001
WDR12	2.57343	1.32671	4.99171	0.00719768	0.0058018	0.00516954
ATP6AP1L	0.798994	0.680958	0.937492	0.0137956	0.00581149	0.00593457
REM1	1.73841	1.16707	2.58946	0.0147756	0.00581167	0.00653036
NINL	1.34448	1.08936	1.65933	0.00571712	0.00581826	0.00582896
ACVRL1	0.73797	0.591843	0.920177	0.0227834	0.00582586	0.00695762
YPEL5	0.266311	0.103769	0.683456	0.00547589	0.00584805	0.00593368
MON1A	0.326873	0.149609	0.714169	0.0061144	0.00588462	0.0050445
OR2AG2	0.751154	0.617902	0.913141	0.00615555	0.00589054	0.00407948
[truncated: 18,188 more rows]
