# Supplementary material for: Machine Learning-Based Integration Identifies Plasma Cells-Related Gene Signature ST6GAL1 in Idiopathic Pulmonary Fibrosis and Its Pan-Cancer Analysis
Source: Research Square preprint supplement (doi:10.21203/rs.3.rs-3399609/v1), 2023-10-11
Supplement: Supplementary file 4 [file a2d5663bd90749fb8de682f9.xlsx]

## Sheet: Figure 7
Figure 7C
ST6GAL1
Group	n1	n2	n3	n4	n5	n6	Average
CTL	0.687605	1.1927	1.03189	0.962384	1.15619	0.969235	1
BLM	1.17168	1.34878	1.31138	1.98803	2.88153	2.2557	1.82618

## Sheet: Supplementary Figure 5
Supplementary Figure 5B
Fibrotic area(%)
Group	n1	n2	n3	n4	n5	Average
CTL1	6.229	6.78	7.338	5.694	4.622	6.1326
CTL2	8.645	10.305	11.134	11.973	12.808	10.973
CTL3	6.982	8.488	9.254	10.029	10.029	8.9564
BLM1	19.364	21.97	23.208	24.399	25.557	22.8996
BLM2	19.855	23.5	25.205	26.824	28.334	24.7436
BLM3	22.795	27.136	29.215	31.212	33.136	28.6988
Supplementary Figure 5D
Fn1
Group	n1	n2	n3	n4	n5	n6	Average
CTL	0.828556	1.06869	0.845267	1.11423	0.868424	1.27483	1
BLM	8.26691	5.93168	2.02685	4.49433	1.73244	5.658	4.68503
Supplementary Figure 5D
Col1a1
Group	n1	n2	n3	n4	n5	n6	Average
CTL	0.967455	1.13249	0.912607	0.981504	1.10051	0.905438	1
BLM	3.72705	3.25215	1.20722	2.46428	1.0267	2.66207	2.38991
