# Supplementary material for: Machine Learning-Based Integration Identifies Plasma Cells-Related Gene Signature ST6GAL1 in Idiopathic Pulmonary Fibrosis and Its Pan-Cancer Analysis
Source: Research Square preprint supplement (doi:10.21203/rs.3.rs-3399609/v1), 2023-10-11
Supplement: Supplementary file 5 [file ca8315b8edb3a20b4a2d2f75.xlsx]

## Sheet: Sheet1
Reference	Gene signatures	Number	Formula	DOI
Huang et al. 2022	MET, SH3BP4	2	MET expression × 0.545 - SH3BP4 expression × 0.461	10.3389/fimmu.2022.997138
Lyu et al. 2022	GGT5, ACOX2, CYP4F3, HACD4, ODC1	5	GGT5 expression × 0.0949389697248446 + ACOX2 expression × 0.315559675709913 + CYP4F3 expression × 0.00450989430661515 - HACD4 expression × 0.284593576349762 + ODC1 expression × 0.190681441039345	10.3389/fendo.2022.1001563
Zheng et al. 2022	IL1R2, S100A2, CCL8	3	IL1R2 expression × 0.012 + S100A12 expression × 0.014 + CCL8 expression × 0.048	10.3389/fgene.2022.865052
Yin et al. 2022	TPBG, MYC, FFAR2, CCL2	4	TPBG expression × (-1.096) + MYC expression × 1.199 + FFAR2 expression × 0.457 + CCL2 expression × 0.405	10.3389/fimmu.2022.1010345
Cai et al. 2022	ARL4C, GPR56, HMHA1, ITM2C, MARCKS, PXN, RAB37, RASSF2	8	ARL4C expression × (-0.3798) + GPR56 expression × 0.4352 - HMHA1 expression × 0.4321 - ITM2C expression × 0.1269 + MARCKS expression × 0.3978 + PXN expression × 0.4978 - RAB37 expression × 0.1745 + RASSF2 expression × 0.2619	10.3389/fimmu.2022.837188

## Sheet: Sheet2
#GSE70866-Training cohort (Freiburg & Siena)
OS.time	OS	PCRGS	Huang	Lyu	Zheng	Yin	Cai
97.5333	0	-0.63721	-1.72263	1.23764	0.299394	12.4821	3.13307
10.1667	1	0.150547	-2.23016	1.20336	0.259266	12.9499	2.78165
18.5667	1	-0.0228635	-2.2928	0.854003	0.405645	15.3219	4.12783
5.03333	1	-0.0852926	0.439648	2.12626	0.653757	16.5692	6.49827
46.8	1	-0.00465347	-2.22059	1.1041	0.461468	14.6218	3.57697
23.9333	1	-0.412916	-0.805309	0.732964	0.382389	13.5634	4.03606
5.56667	1	-0.217097	-1.65191	1.03605	0.359706	12.9937	3.57233
35.1333	1	-0.101216	-2.54559	1.10274	0.419894	13.3297	3.56673
19.1333	1	-0.169032	-1.83365	0.527705	0.403978	11.8564	3.53747
6.6	1	-0.0794322	-1.65348	1.87272	0.495456	14.4922	3.86211
36.0333	1	-0.383821	-1.39388	1.61117	0.446762	15.8741	4.18025
32.7333	1	0.104487	-2.43419	1.12516	0.287314	14.9347	3.36041
42.4	1	-0.221644	-2.17973	1.15572	0.403722	12.2311	2.80746
71.7333	0	-0.542418	-1.84976	0.556451	0.271785	10.421	2.79737
27.0333	1	0.506712	-1.3011	1.31179	0.461105	13.3523	4.26059
83.2667	0	-0.453351	-2.48867	0.768124	0.32036	11.8044	2.6485
3.23333	1	-0.0460069	-1.88003	1.04294	0.314	13.407	2.63256
2.73333	1	-0.464719	-1.2269	1.46984	0.478778	15.5315	5.22342
27.4667	1	-0.191998	-1.44198	1.37571	0.388379	13.8276	4.13036
20.6667	1	-0.172031	-1.85163	1.18818	0.468482	13.0693	3.55696
65.5	0	-0.100274	-1.65154	1.41032	0.282301	14.9593	3.61884
74.5667	0	-0.428094	-1.40816	1.0352	0.333535	13.5706	3.56946
12.4333	1	0.604124	-1.46316	1.93179	0.528811	15.4304	5.68176
31.1	1	0.55803	-1.47546	1.51414	0.601658	15.2636	4.61986
66.4333	0	-0.733774	-1.86645	1.28605	0.333366	13.0915	3.47233
39.2	1	0.658447	-0.633782	1.01825	0.714506	13.8449	4.65699
7.36667	1	-0.117325	-1.25951	1.86347	0.480002	17.738	4.21281
32.5	1	-0.269945	-1.94175	1.51126	0.41454	15.8849	4.29256
49.1667	1	0.207364	-2.27853	1.41233	0.441528	14.377	4.5022
58.9667	1	-0.264559	-1.81166	1.2396	0.498283	12.1251	3.93144
9.23333	1	0.399021	-0.171653	2.02155	0.682836	15.3927	5.26933
38	1	-0.203486	-1.92889	1.28801	0.41519	16.0082	4.31135
60.4333	0	-0.100053	-2.50987	0.819183	0.346925	14.3338	2.78113
14.4	1	-0.439292	-0.435731	1.75929	0.49913	16.5738	4.03425
30.1667	1	-0.583871	-2.04458	1.70959	0.496679	13.4439	3.4565
29.7667	1	0.383626	-0.559678	1.75929	0.564066	17.4161	4.4797
52.6667	0	-0.129847	-1.81954	0.89511	0.60653	13.9762	3.75837
48.7	0	-0.642447	-2.12809	0.785253	0.226663	7.75619	1.79848
35.1667	1	0.311824	-0.914263	1.16958	0.384251	14.1082	2.90628
1.5	1	0.134479	0.302415	2.11338	0.56974	18.0416	5.414
18.2333	1	0.921542	0.265158	1.67804	0.409651	14.321	5.92383
32.3667	0	-0.359757	-1.83461	1.06881	0.336432	12.1779	3.0824
19.9667	1	0.0414186	-0.609329	1.78224	0.532498	17.4888	4.68936
17.8333	1	-0.0963511	-1.87745	1.17	0.210594	13.764	3.15383
1.96667	1	0.394106	3.05081	2.84432	0.669159	12.9036	5.60444
7	1	0.863007	-0.821205	2.22205	0.596805	16.6358	4.47683
23.2667	0	-0.120918	0.452042	1.86384	0.48654	14.57	3.78702
7.53333	1	0.355195	1.11396	1.82398	0.505203	16.919	5.01082
22.3333	0	-0.370062	-2.10641	1.08454	0.40915	13.819	3.72358
3.26667	1	0.0807823	0.556295	1.6211	0.654932	15.046	5.08442
21.2	0	0.0512935	-1.66231	1.25556	0.424283	11.9253	3.87829
20.4333	0	-0.303346	-2.24628	0.82672	0.244953	11.6613	1.61761
19.8	0	-0.376915	-2.50186	1.35547	0.29177	14.2496	3.10751
10.2	1	0.088829	0.51848	2.53281	0.579095	16.8763	5.30496
2.66667	1	1.52082	1.60313	2.72983	0.932922	20.4904	6.99325
18.8333	1	0.0359692	-0.233411	1.78496	0.467423	14.6137	4.55929
5	1	1.01924	0.704043	1.991	0.658451	15.4939	4.7888
17.4333	0	-0.402793	-0.647928	1.84374	0.417934	12.2745	3.99393
27.9667	0	-0.664614	-1.22898	1.19608	0.377786	12.066	2.86393
2.2	1	0.772361	1.44738	2.76549	0.718703	19.168	6.58517
16.3	1	0.535501	1.09785	1.95951	0.542266	14.5362	5.42809
0.7	1	0.730995	1.62753	2.6659	0.767907	18.5006	6.61037
2.96667	1	-0.218987	-0.612917	1.42288	0.419337	15.5855	4.43284
18.3667	0	-0.152071	-2.31331	1.12109	0.417926	14.9314	3.48637
4.26667	1	-0.109969	0.276693	2.16521	0.47443	17.4475	6.49964
15.6	0	-0.524793	-0.360449	1.56341	0.379733	13.3963	3.68973
28	1	-0.882037	-2.0855	0.940439	0.304458	13.8114	2.58886
6.56667	1	0.42771	0.57041	1.52338	0.573607	15.4125	4.91314
15.7333	1	1.0669	0.558689	1.54347	0.58284	15.4436	5.6766
29.0667	0	0.0132705	-0.92193	1.33663	0.557642	16.5434	3.13913
26.2333	1	0.0141441	-1.61492	1.53024	0.624524	14.4319	3.23944
35.1333	0	-0.835264	-2.26577	0.96867	0.32301	12.8096	3.39393
35.0667	0	-0.265656	-0.949108	0.788008	0.411327	13.4699	2.6995
12.6	1	-0.350234	-1.72863	1.33716	0.431858	14.3788	3.81772
22.9333	1	0.565158	0.951496	1.6495	0.490475	15.6266	5.16966
16.4333	1	-0.299027	-1.92913	1.58115	0.41957	15.3148	4.19172
31.9333	1	-0.112736	-2.43851	1.14911	0.488952	13.0611	3.55853
28.7667	0	-0.0282595	-1.77241	1.44485	0.409321	11.8044	3.44579
19.5333	1	0.00808251	-0.243591	2.09682	0.633168	16.495	5.64592
36.8333	0	-0.177492	-2.0581	1.12757	0.358999	7.84061	3.57789
39.0333	1	0.0444555	-1.65715	0.719315	0.353039	11.3963	3.94055
3.66667	1	-0.192132	-0.130633	1.46521	0.50296	15.3492	4.40074
15.7333	1	-0.504962	-1.00989	2.00913	0.542742	16.35	4.94525
4.63333	1	-0.181177	-0.320003	1.62621	0.465973	15.8	5.02967
28.0333	0	-0.407035	-2.31674	1.06596	0.406935	13.9786	3.2314
9.8	1	0.49426	-0.231167	2.42705	0.334691	14.2557	5.77164
12.9333	1	1.07229	2.04267	2.52581	0.728655	17.5228	6.33136
10.6	1	0.29995	-0.650226	1.38368	0.596755	16.6865	3.87987
36.8	0	-0.335153	-2.15497	0.627399	0.430747	13.1567	2.67168
36.5667	0	-0.458556	-1.94248	1.00795	0.41372	14.1741	2.98053
1.4	1	0.427397	0.906197	2.58585	0.747951	19.4679	6.52881
9.2	1	0.19412	0.0669334	1.52799	0.732654	16.6587	5.13981
2.63333	1	0.138681	-1.98049	1.7694	0.571324	17.4011	4.39632
34.2333	0	-0.482284	-2.81431	0.799655	0.344813	12.8392	3.203
18.5667	1	0.464321	-0.990418	1.9426	0.472059	14.4389	4.99201
22	0	-0.116862	-2.02337	1.04786	0.42072	11.5877	2.91723
4.8	1	-0.253098	-1.52569	1.47868	0.372452	13.6894	3.92083
9.03333	1	-0.352862	-0.875022	1.16142	0.369865	12.2168	4.05239
20.6333	0	-0.453765	-2.54084	1.47491	0.319018	14.4692	3.46997
28.6333	0	-0.249711	-1.64001	1.24647	0.386319	18.1544	3.41688
19.4333	0	0.225578	-0.727348	1.17944	0.595657	12.1912	4.37369
24.3667	1	-0.242313	-1.51937	1.36234	0.455891	14.564	3.30488
18.3	0	-0.514709	-1.76993	1.29889	0.261834	12.7843	3.37501
16.2333	0	0.275823	-1.88373	1.26183	0.519272	14.773	3.3239
18	1	-0.172318	-0.776184	1.31029	0.422154	14.0778	4.20331
9.4	1	1.25537	1.39278	1.66691	0.695922	14.0461	5.60568
15.3	0	-0.437946	-2.17219	1.34848	0.197654	12.6162	2.19334
14.2	1	-0.203928	-0.307497	2.42756	0.190252	8.16101	2.49118
13.3667	1	0.932471	-1.62269	2.04266	0.268632	12.852	3.03141
12.7667	0	0.0500734	0.384156	1.33972	0.320446	12.9496	4.03866
12.3	1	0.705625	-2.32532	1.73376	0.339648	11.6719	4.53665
8.13333	1	0.323358	0.170676	1.67983	0.484454	15.6182	5.28307

## Sheet: Sheet3
#GSE70866-Validation cohort (Leuven)
OS.time	OS	PCRGS	Huang	Lyu	Zheng	Yin	Cai
48.1	1	-0.255083	-1.38846	1.31137	0.304714	15.3826	4.09158
19.5667	0	0.0935816	0.265414	1.05289	0.421697	13.0255	3.93558
7.13333	1	0.341475	0.816359	1.18471	0.424537	8.99039	3.68637
12.0667	0	-0.270312	-0.46842	1.3829	0.373338	13.8541	2.91298
15.6	1	0.521871	0.258031	1.52266	0.38378	12.293	4.28646
22.5333	1	0.546331	-0.993328	1.44451	0.398877	12.2289	3.21464
47.4	0	0.375947	-0.346373	0.815101	0.420606	10.4112	3.34971
49.0667	1	0.340225	-1.12028	0.646813	0.348262	12.5004	2.2601
14.4333	0	0.283185	-1.05007	1.26338	0.277535	13.3188	3.74886
42.3667	0	-0.628525	-2.10602	0.706633	0.22984	9.58768	1.94657
42.7	1	0.121176	-1.19944	1.37107	0.475964	13.5272	4.10741
23.3	0	0.104868	-0.335646	1.32314	0.137889	9.74914	4.35106
11.7	1	0.418936	2.10805	1.42512	0.432075	11.6629	6.03801
10.9333	0	0.0174844	-1.0184	1.55925	0.438773	14.3208	5.67408
17.6333	0	-0.435319	-1.19591	1.28492	0.280517	12.2798	4.39971
28.2	0	-0.137772	-1.9933	1.13861	0.201782	12.8029	3.06582
23.3	0	-0.300288	0.204118	1.04127	0.291838	14.2242	4.86473
13.9667	0	-0.235626	-1.26262	0.731427	0.352953	12.5258	3.60519
41.7667	0	-0.684901	-2.06722	0.490923	0.253543	10.0011	2.75663
23.2333	0	0.749004	-0.83739	0.724868	0.421326	10.4557	2.65651
41.3333	0	-0.0826855	-0.351688	0.763548	0.380444	12.1264	4.36348
46.4667	1	0.0432086	0.496204	1.2529	0.393363	13.7131	4.21135
47.9667	0	-0.0415996	1.02075	0.840188	0.358878	13.3801	3.0803
21.2333	1	-0.615194	0.636616	0.596415	0.305456	11.7156	3.69373
30.6	0	0.124023	0.364043	1.14068	0.332702	14.4934	5.36924
60.5667	0	-0.4908	-0.313745	1.08065	0.310911	12.84	2.82723
9.96667	1	0.460465	-1.37088	1.51052	0.469161	14.1342	5.49071
12.5667	0	1.17213	0.777643	1.37722	0.489026	13.8064	5.99591
18.2	0	-0.37567	-1.81435	1.5657	0.316915	12.1165	4.98971
25.2667	0	-0.475394	-1.36436	1.18384	0.268925	11.6322	3.57874
18.0333	1	-0.284984	-0.917957	1.10227	0.294394	11.9781	3.69677
3.1	1	0.894262	1.61868	1.45594	0.598574	12.2699	4.59496
30.0667	0	0.12742	-2.33706	1.57256	0.508467	12.6054	3.9171
13.1667	1	-0.0405723	-1.57254	0.951972	0.250101	12.4422	3.85986
22.1667	0	-0.1563	0.497405	1.14811	0.329446	10.2477	4.45461
41.5333	0	-0.180414	-1.05795	0.719129	0.223564	12.2482	3.49024
7.33333	1	1.18317	3.49236	1.77754	0.329829	14.3353	6.24174
7.13333	1	0.139604	-2.19178	1.29705	0.258241	11.7019	3.457
11.6	0	-0.435034	0.29502	0.603997	0.28244	14.0372	4.75411
6.66667	1	-0.0633181	-0.00807809	0.305854	0.294812	14.0273	3.71497
8.43333	1	0.130197	0.210608	1.40306	0.395771	12.9657	4.34359
27.5	0	0.255344	-0.946054	1.2414	0.400204	12.2108	3.63581
12.9667	0	-0.355521	0.677359	1.52438	0.128561	6.97924	2.50347
12.3333	0	-0.00093733	-0.671749	1.24568	0.441337	10.4696	4.35834
18.6333	0	-0.807906	-0.918305	-0.0684842	0.131655	7.65314	2.94037
19.1333	0	0.608205	0.399566	2.10202	0.22472	10.7428	3.42808
46.8333	0	0.013897	-0.927492	1.83687	0.380861	16.0667	4.3722
9.9	1	-0.249104	-0.0214506	0.738485	0.426244	14.0597	5.28668
8.1	0	-0.230937	-2.29708	1.39186	0.296126	11.6754	3.14468
7.93333	0	-0.278609	-2.40786	0.770382	0.269111	11.998	3.64567
7.9	0	-0.198362	-1.55626	0.664165	0.266827	12.5084	3.96897
10.2	1	0.0749814	-0.0645359	1.20074	0.394382	13.0277	3.58367
34.6	1	-0.405921	-0.0606761	0.958215	0.381416	12.3796	3.87161
29.8333	0	-0.390948	-0.848728	1.35625	0.313032	11.3396	3.8161
59.7667	0	0.294433	-0.279492	0.627962	0.396257	11.1336	3.22555
12.8	0	-0.627307	-0.339726	1.51781	0.417574	9.7609	3.35017
14	0	-0.700852	0.915963	0.74795	0.442869	10.9816	4.13273
49.7	0	-0.760967	-1.38878	0.708231	0.241694	10.0432	2.48426
7.86667	1	0.248915	-0.957655	1.26578	0.47241	13.7841	4.45879
36.6	0	0.182211	-0.0522255	0.117075	0.363692	11.398	3.3129
11.3333	1	0.125347	0.29576	0.69403	0.450405	11.8359	4.13455
24.2667	1	0.940133	0.538905	1.69382	0.493124	14.1817	5.27497
4.43333	1	0.275256	0.482501	1.90457	0.543114	16.0614	5.14353
31.3	0	-0.0101244	-0.888924	1.13592	0.371666	8.04793	3.20081
