# Supplementary material for: Machine Learning-Based Integration Identifies Plasma Cells-Related Gene Signature ST6GAL1 in Idiopathic Pulmonary Fibrosis and Its Pan-Cancer Analysis
Source: Research Square preprint supplement (doi:10.21203/rs.3.rs-3399609/v1), 2023-10-11
Supplement: Supplementary file 6 [file f1b722ba439cce8bf99d1d82.docx]

Supplementary Material

Machine Learning-Based Integration Identifies Plasma Cells-Related Gene Signature ST6GAL1 in Idiopathic Pulmonary Fibrosis and Its Pan-Cancer Analysis

Fanjie Lin1†, Ken Lin2†, DongLei Li2†, Weiguo Kong1†, Xinguang Wei1, Wei He1, Tianchi Xiao2, Hao Zu2, Jiayu Zhuang2, Zili Zhang1* and Wenju Lu1*

1State Key Laboratory of Respiratory Diseases, Guangdong Key Laboratory of Vascular Diseases, National Clinical Research Center for Respiratory Diseases, Guangzhou Institute of Respiratory Health, The First Affiliated Hospital of Guangzhou Medical University, Guangzhou, China

2Guangzhou Medical University, Guangzhou, China

*** Correspondence:** *wlu92@qq.com; zlzhang@gzhmu.edu.cn*

†These authors contributed equally to this work and share first authorship

# Supplementary Figures an Tables

- 1. **Supplementary Figures**

**
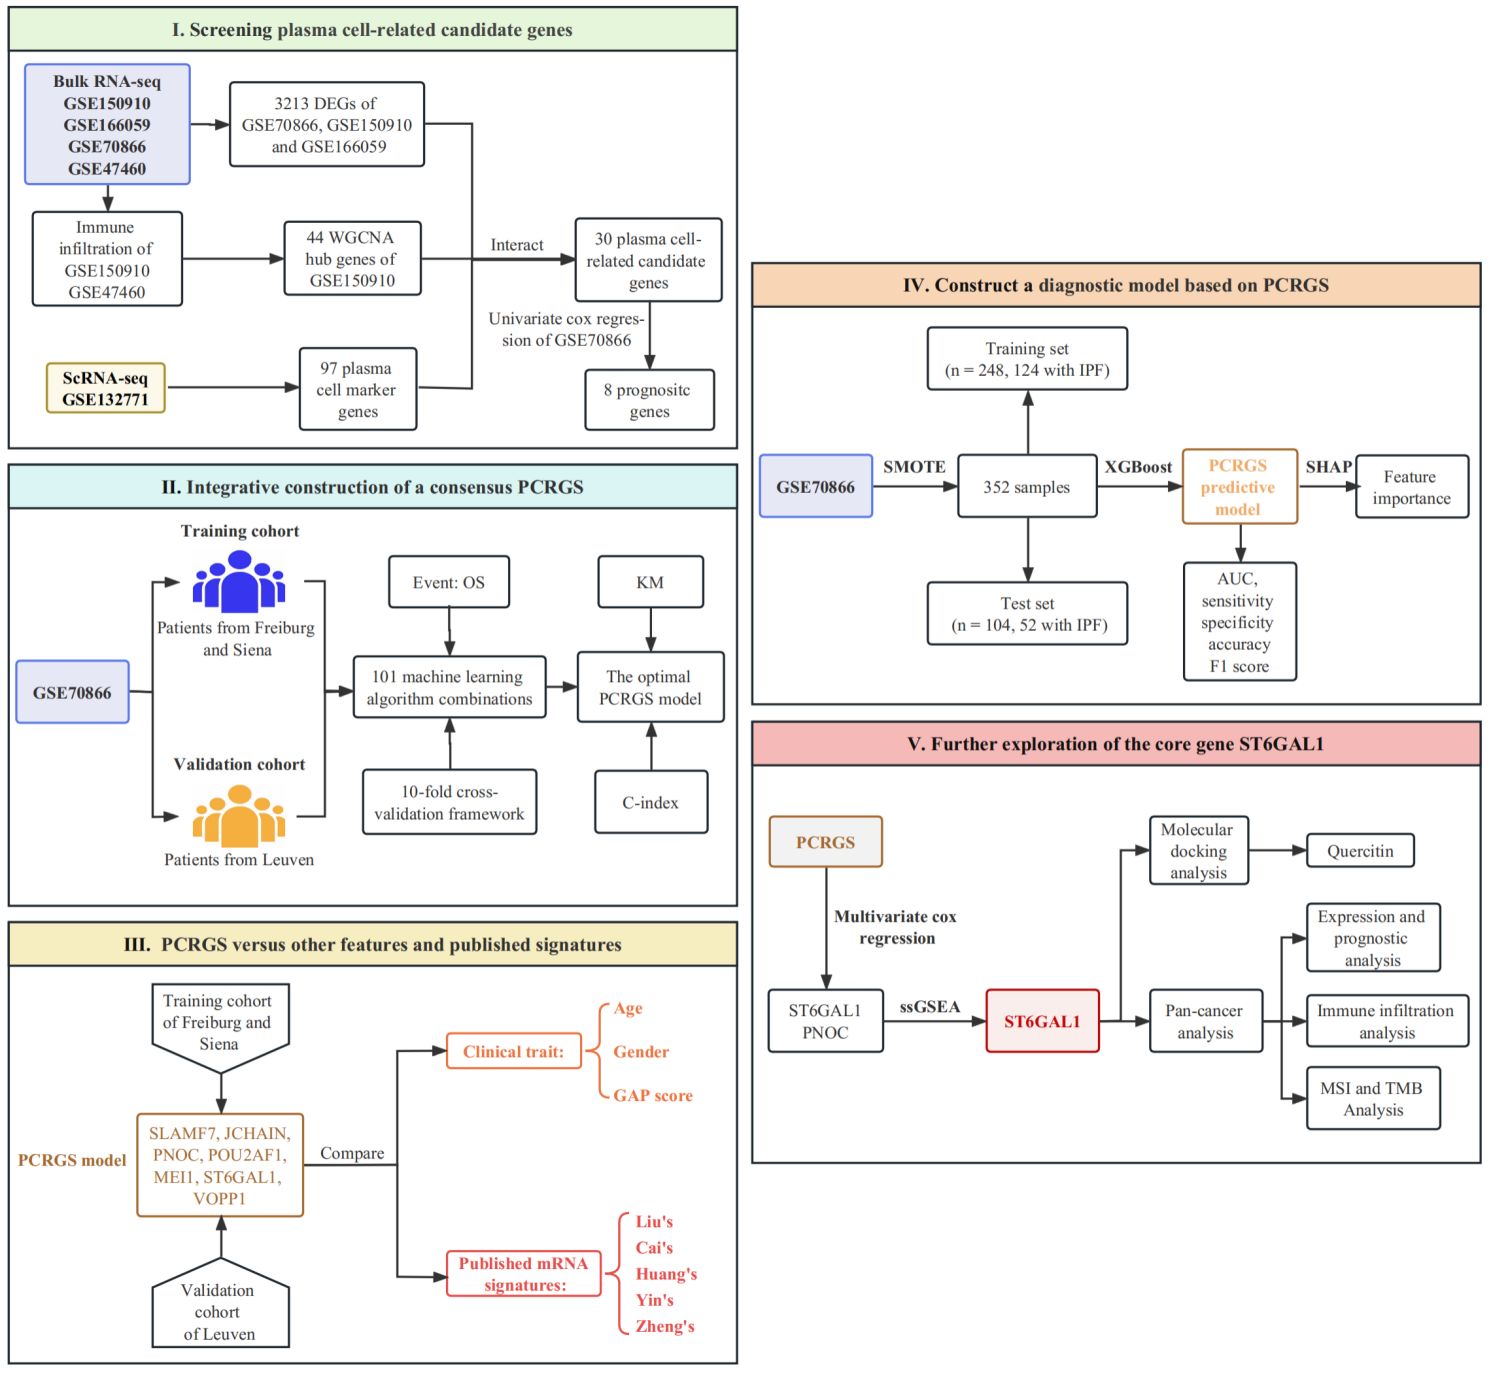
**

**Supplementary Figure 1.** The overall design of this study.


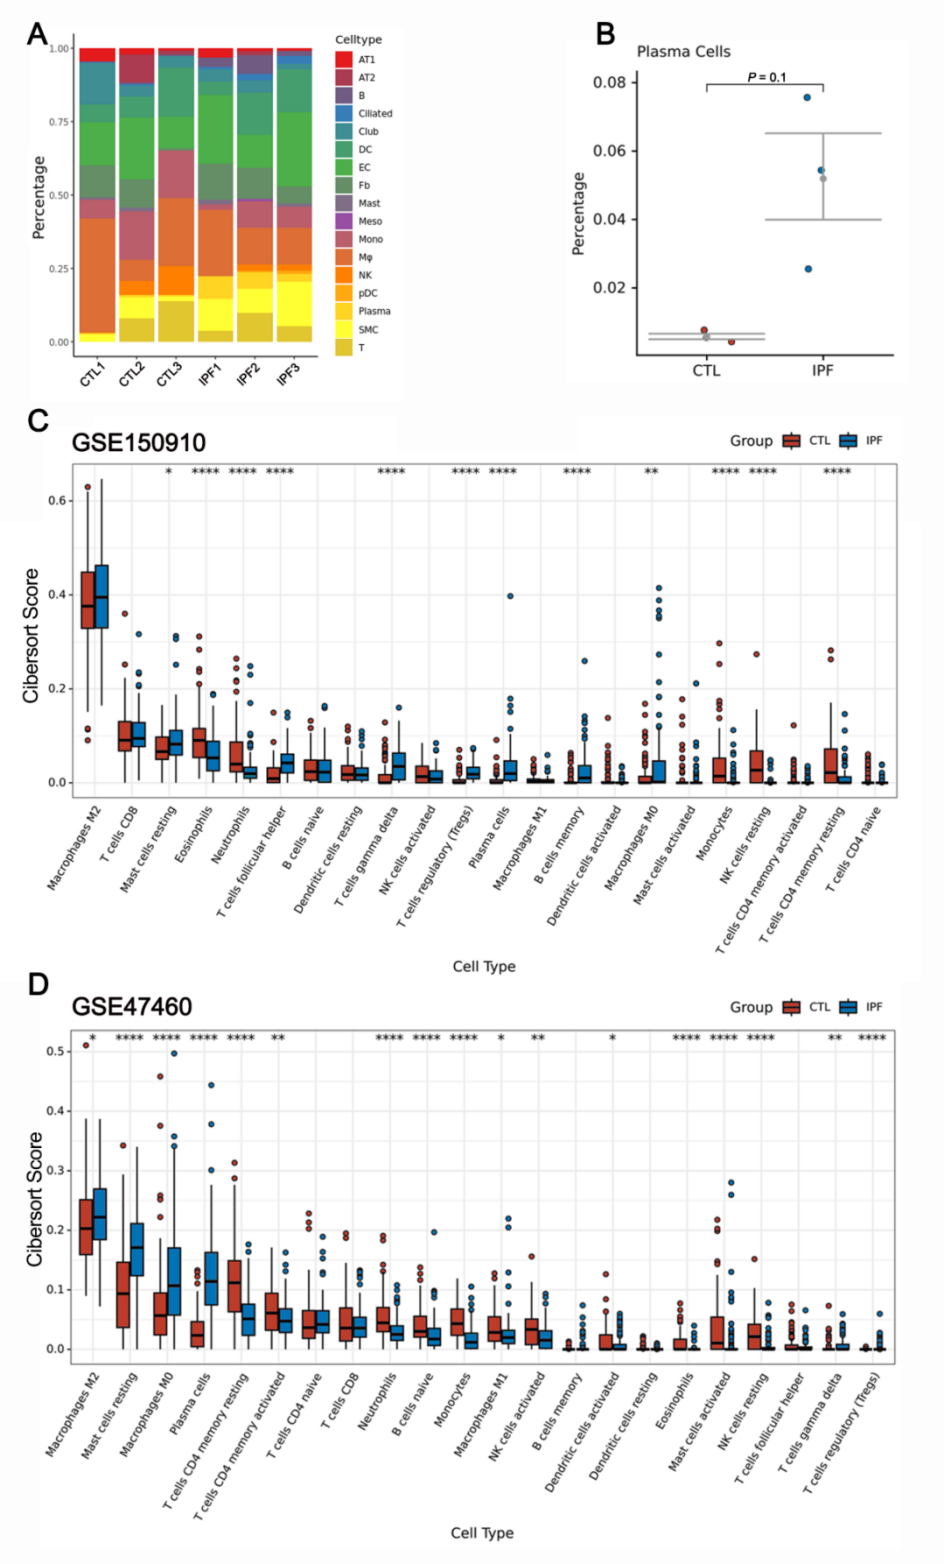


**Supplementary Figure 2.** The cell count proportion and immune infiltration analysis. **(A)** Bar plot showing the cell count proportion of each cell cluster in IPF and controls. **(B)** Scatter chart of the proportion of plasma cells in each sample. **(C, D)** Box plot showing the differences in the infiltrating immune cells between IPF and controls of the datasets GSE150910 **(C)** and GSE47460 **(D)**. **P* < 0.05, ***P* < 0.01, ****P* < 0.001, *****P* < 0.0001.

**
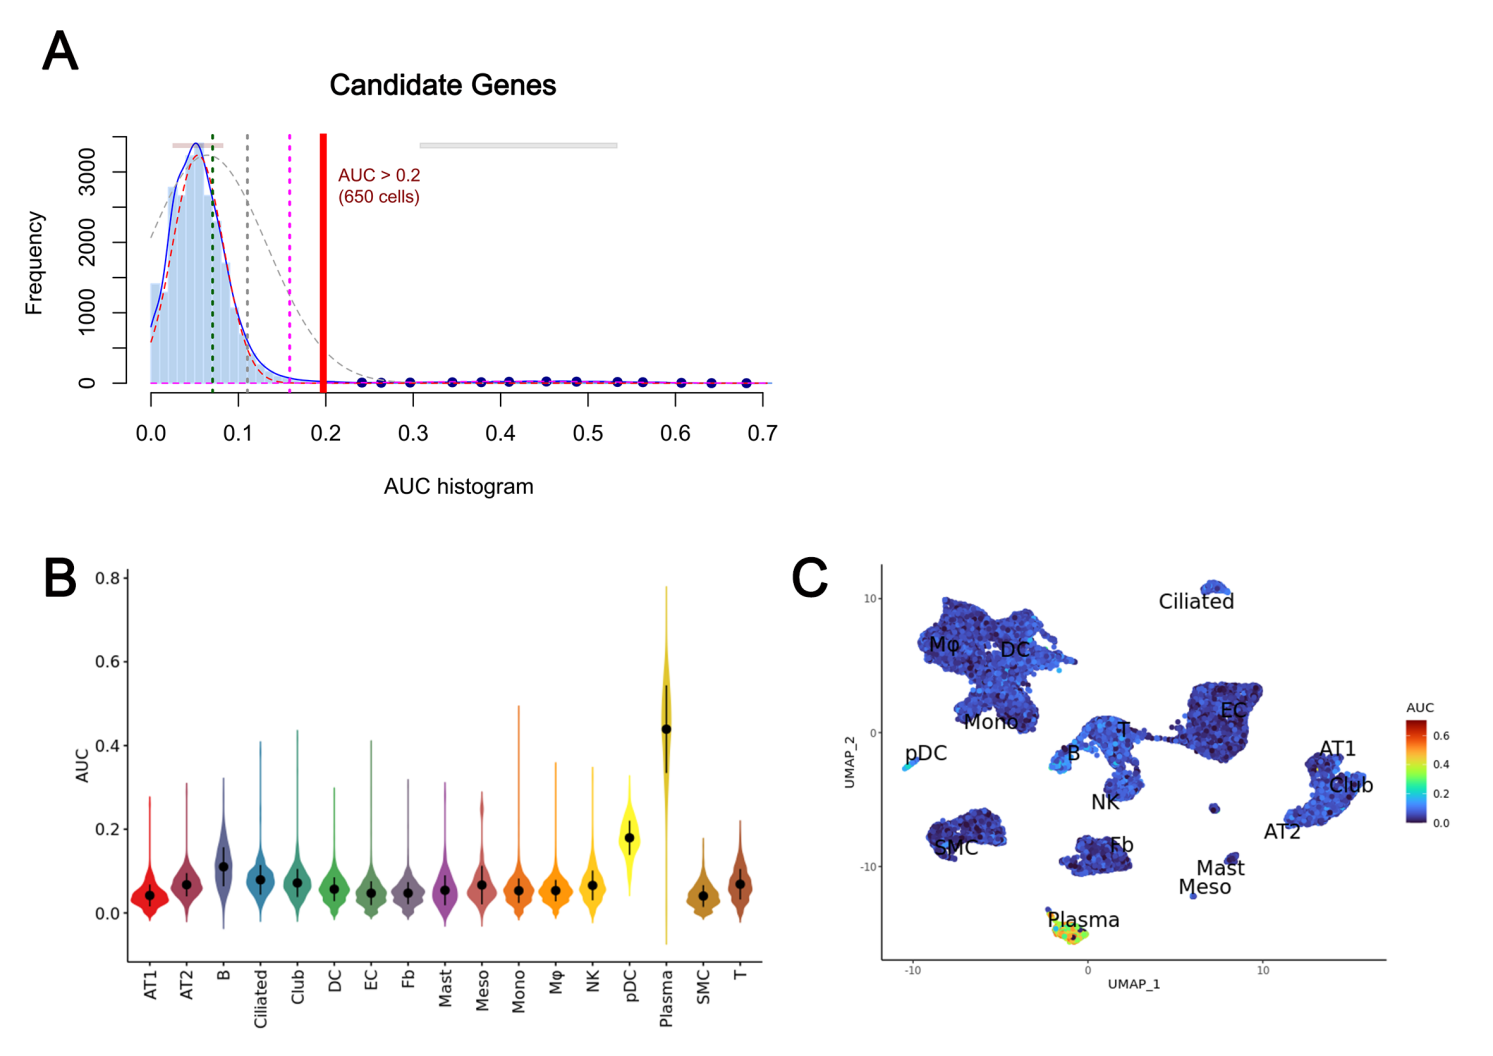
**

**Supplementary Figure 3.** Candidate genes activity of each cell line. **(A)** AUC scores of 30 candidate genes in each cell line. The threshold was set as 0.2. **(B, C)** Violin plot and UMAP plot of AUC score in each type of cells. Plasma cells express more genes and gain higher AUC values.


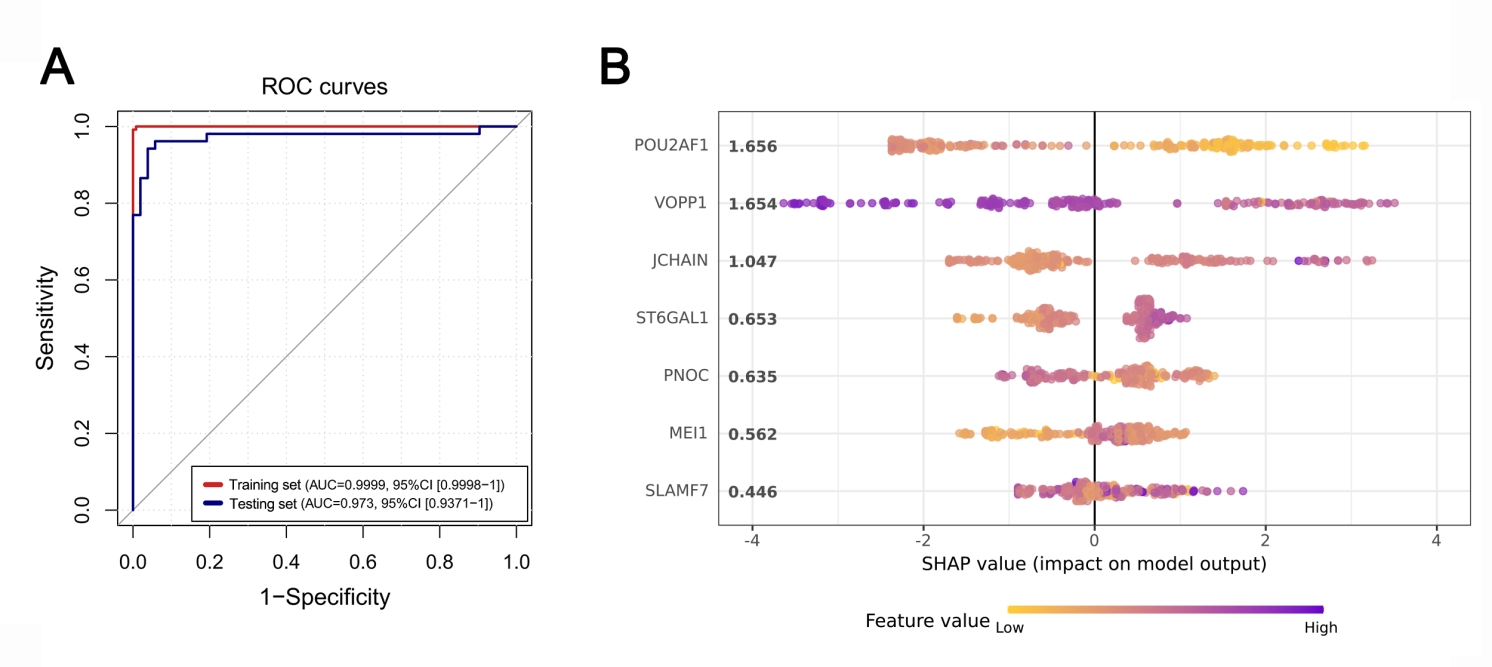


**Supplementary Figure 4.** Evaluation of the predictive model. **(A)** ROC curves of XGBoost model in the training and testing sets. AUC values and 95% CIs are shown in the legend. **(B)** Relationship between features and IPF in XGBoost model. Diversion on x-axis represents effect on model output, with colors used to represent low (yellow) to high (purple) value of predictors.

**
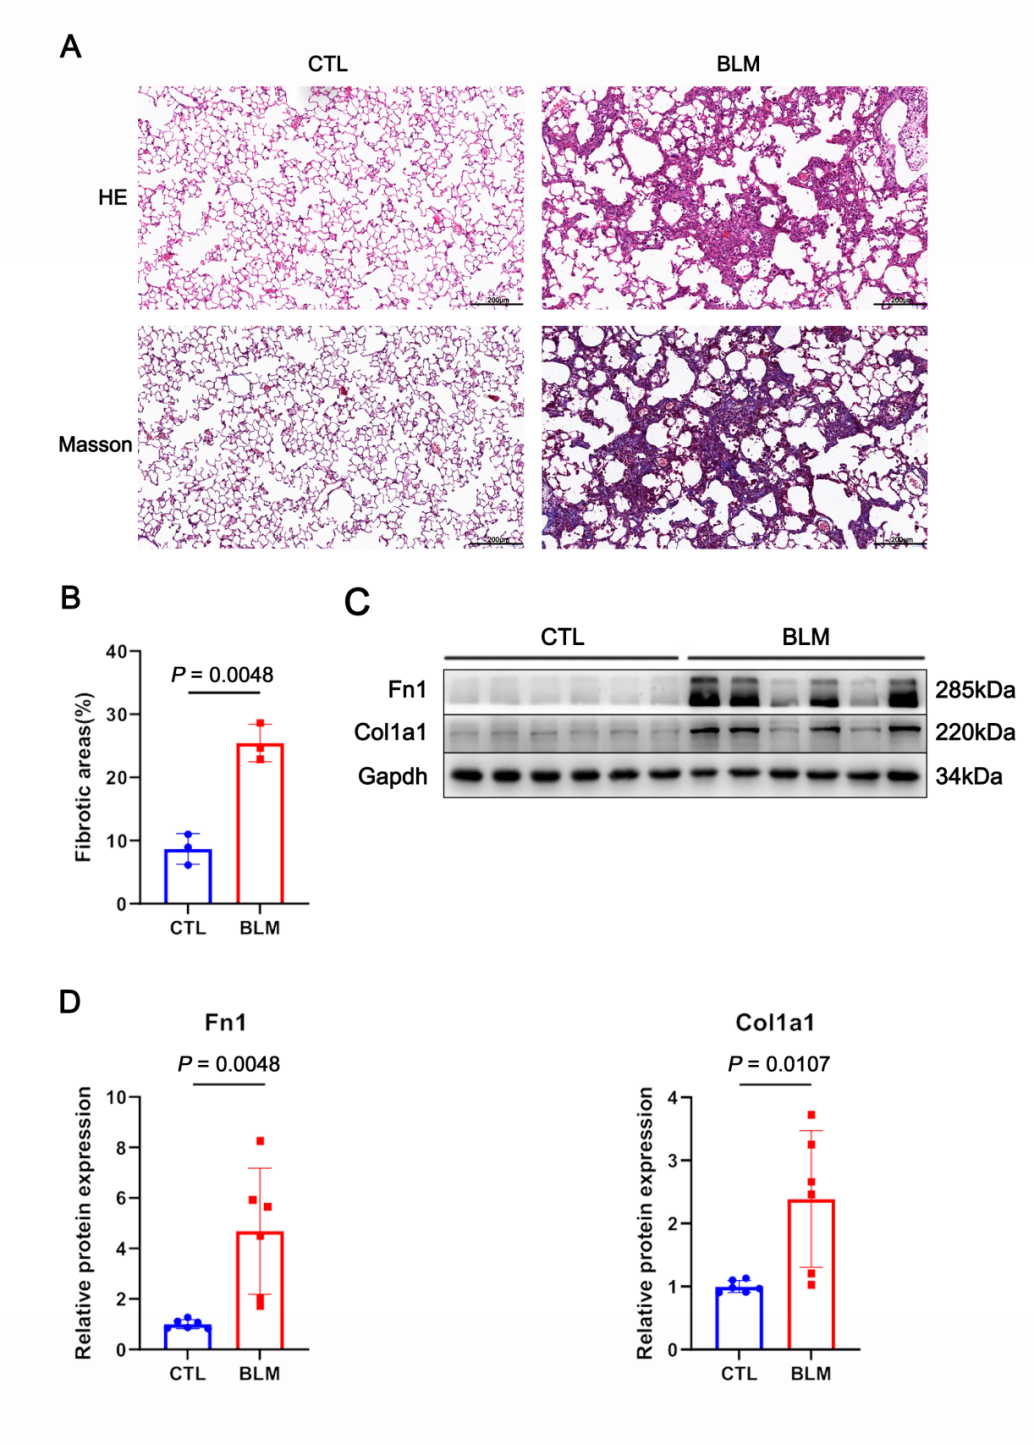
**

**Supplementary Figure 5.** The degree of lung fibrosis after BLM-induced lung injury. **(A)** H&E and Masson’s trichrome staining of left lungs from BLM (n = 3) and control (n = 3) groups. **(B)** Quantifications of Masson's trichrome-stained collagen areas for **Supplementary Figure 5A**. Data shown are mean±SD. **(C)** Western blot results of Fn1 and Col1a1 protein expressions in lungs of BLM (n = 6) and control (n = 6) groups. **(D)** Densitometric analysis of Fn1 and Col1a1 in the immunoblots using Gadph as the internal reference.

**
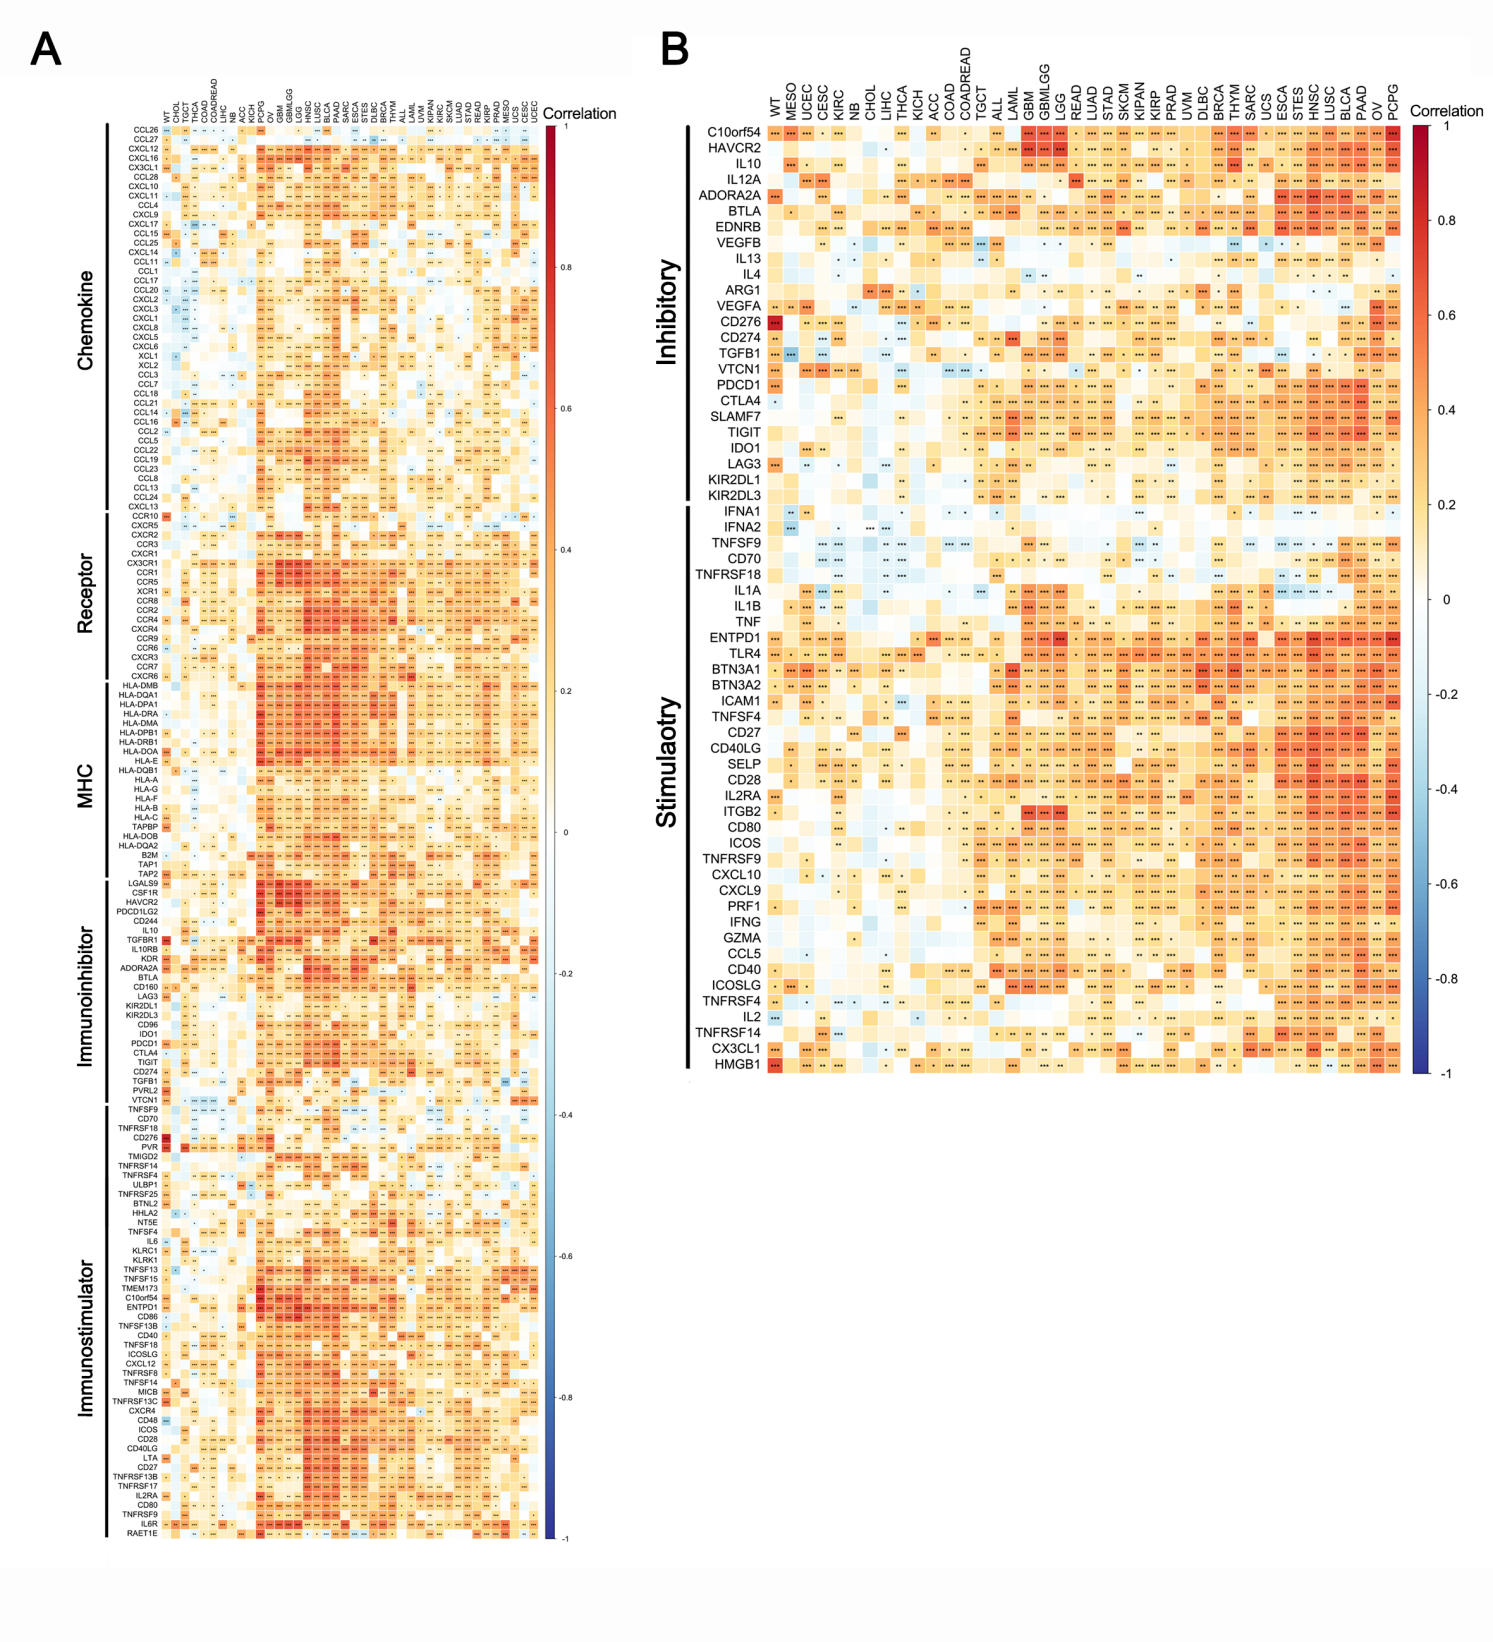
**

**Supplementary Figure 6.** ST6GAL1’s correlation with immune-related genes in pan-cancer. **(A)** The correlation between ST6GAL1 expression and immunomodulatory genes, including chemokines, receptors, MHC, immunoinhibitors and immunostimulators. **(B)** ST6GAL1’s correlation with immunological checkpoints, including inhibitory genes and stimulatory genes. **P* < 0.05, ***P* < 0.01, ****P* < 0.001.


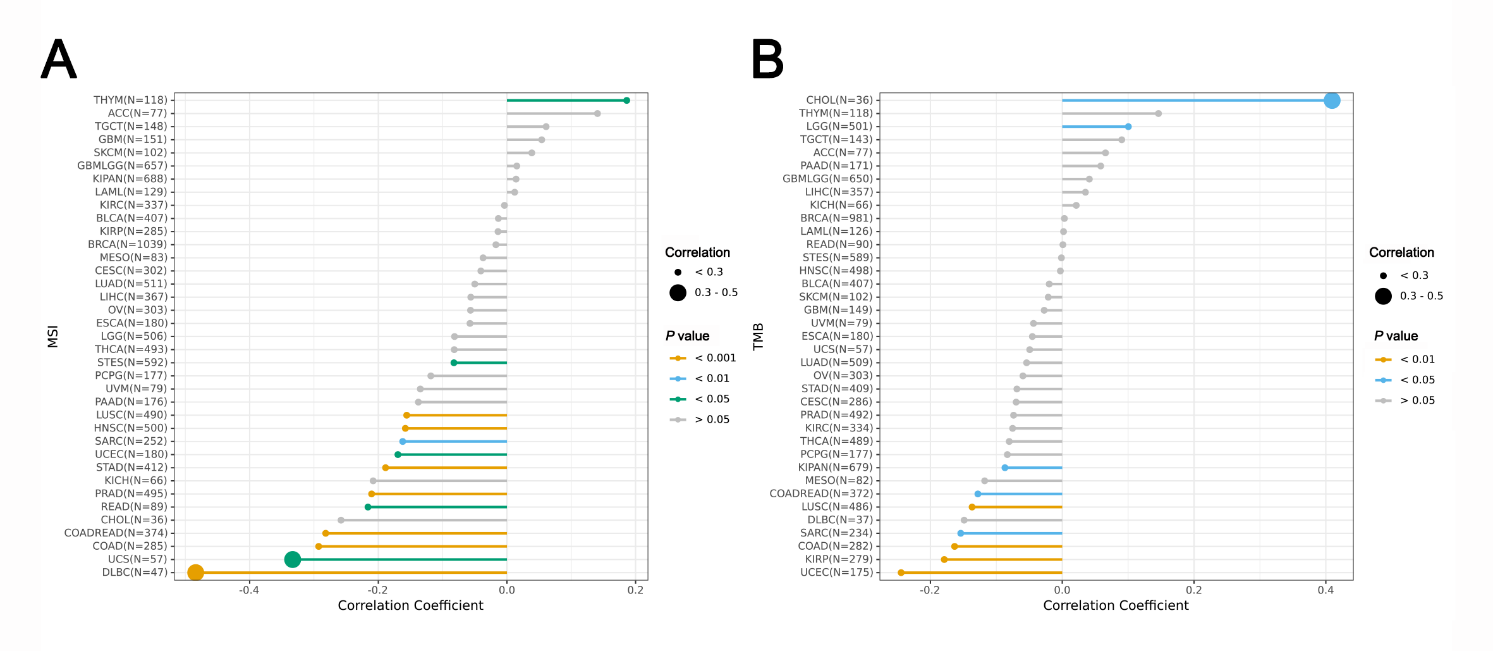


**Supplementary Figure 7.** The correlation between ST6GAL1 expression levels and MSI **(A)** and TMB **(B)** in pan-cancer.

- 1. **Supplementary Tables**

**Supplementary Table 1. A total of 97 plasma cells-related genes derived from scRNA-seq.**

| **Gene symbol** | **Control-**P value | **Control-average log2FC** | **Control-pct.1** | **Control-pct.2** | **Control-adjusted** P value | **IPF-**P value | **IPF-average log2FC** | **IPF-pct.1** | **IPF-pct.2** | **IPF-adjusted *P* value** |
| --- | --- | --- | --- | --- | --- | --- | --- | --- | --- | --- |
| FCRL5 | 0 | 1.00321434 | 0.6 | 0.001 | 0 | 0 | 0.92355285 | 0.565 | 0.004 | 0 |
| SLAMF7 | 0 | 0.837140572 | 0.543 | 0.009 | 0 | 0 | 0.54078412 | 0.416 | 0.021 | 0 |
| IGKV1-12 | 0 | 1.464469403 | 0.229 | 0.001 | 0 | 7.45E-218 | 1.190844865 | 0.288 | 0.025 | 2.51E-213 |
| JCHAIN | 0 | 8.138104222 | 0.914 | 0.018 | 0 | 0 | 6.756676439 | 0.941 | 0.276 | 0 |
| MZB1 | 0 | 4.551135739 | 0.943 | 0.005 | 0 | 0 | 4.09476008 | 0.986 | 0.041 | 0 |
| PNOC | 0 | 0.429902047 | 0.329 | 0.001 | 0 | 0 | 0.322109701 | 0.257 | 0.007 | 0 |
| POU2AF1 | 0 | 1.053610011 | 0.557 | 0.001 | 0 | 0 | 0.806256629 | 0.494 | 0.014 | 0 |
| CD27 | 0 | 2.131956147 | 0.8 | 0.006 | 0 | 0 | 0.988994407 | 0.598 | 0.042 | 0 |
| IGHA2 | 0 | 4.090076261 | 0.4 | 0.005 | 0 | 6.11E-203 | 5.585341957 | 0.565 | 0.118 | 2.06E-198 |
| AL928768.3 | 0 | 2.064554743 | 0.543 | 0.001 | 0 | 0 | 1.091516469 | 0.31 | 0.015 | 0 |
| TNFRSF17 | 0 | 2.073337571 | 0.8 | 0.001 | 0 | 0 | 0.90680664 | 0.492 | 0.005 | 0 |
| SPAG4 | 0 | 1.2375748 | 0.571 | 0.005 | 0 | 0 | 0.780076071 | 0.488 | 0.014 | 0 |
| JSRP1 | 0 | 1.04752898 | 0.357 | 0.001 | 0 | 0 | 1.202917042 | 0.496 | 0.005 | 0 |
| CD79A | 0 | 2.235553829 | 0.857 | 0.005 | 0 | 0 | 1.648507617 | 0.792 | 0.05 | 0 |
| IGLV6-57 | 0 | 1.532805433 | 0.243 | 0 | 0 | 0 | 1.303844875 | 0.237 | 0.006 | 0 |
| IGLL5 | 0 | 4.616089302 | 0.3 | 0.001 | 0 | 6.35E-187 | 2.616751343 | 0.169 | 0.009 | 2.14E-182 |
| DERL3 | 0 | 2.744323285 | 0.843 | 0.003 | 0 | 0 | 2.56411717 | 0.855 | 0.029 | 0 |
| IGHGP | 9.02E-251 | 0.348780911 | 0.129 | 0 | 3.04E-246 | 0 | 1.154538643 | 0.149 | 0.002 | 0 |
| ZBP1 | 1.04E-237 | 0.48740873 | 0.4 | 0.008 | 3.49E-233 | 0 | 0.426121813 | 0.259 | 0.006 | 0 |
| RP11-16E12.2 | 1.03E-223 | 0.37228698 | 0.286 | 0.004 | 3.48E-219 | 0 | 0.438658977 | 0.288 | 0.002 | 0 |
| MEI1 | 7.11E-218 | 0.759787607 | 0.529 | 0.015 | 2.40E-213 | 0 | 0.439025577 | 0.386 | 0.027 | 0 |
| CD38 | 1.70E-196 | 1.176543162 | 0.629 | 0.025 | 5.74E-192 | 0 | 0.798114612 | 0.512 | 0.02 | 0 |
| FKBP11 | 1.37E-133 | 2.679634228 | 0.9 | 0.087 | 4.61E-129 | 0 | 2.392079828 | 0.939 | 0.119 | 0 |
| PIM2 | 5.81E-107 | 1.481787698 | 0.8 | 0.075 | 1.96E-102 | 0 | 1.510065601 | 0.753 | 0.086 | 0 |
| FAM46C | 1.64E-87 | 0.93946486 | 0.657 | 0.06 | 5.52E-83 | 0 | 0.791567856 | 0.567 | 0.063 | 0 |
| HIST1H2BG | 3.56E-76 | 0.394974011 | 0.229 | 0.009 | 1.20E-71 | 0 | 0.69197427 | 0.288 | 0.015 | 0 |
| TPD52 | 1.32E-75 | 1.149306302 | 0.743 | 0.09 | 4.44E-71 | 0 | 0.615055962 | 0.473 | 0.046 | 0 |
| SEC11C | 3.18E-61 | 2.453481827 | 0.914 | 0.221 | 1.07E-56 | 0 | 1.831216993 | 0.869 | 0.198 | 0 |
| SDC1 | 4.42E-45 | 0.699734702 | 0.471 | 0.058 | 1.49E-40 | 0 | 0.68502813 | 0.441 | 0.035 | 0 |
| SSR4 | 1.31E-38 | 2.480775839 | 0.971 | 0.641 | 4.41E-34 | 3.47E-304 | 2.756129452 | 0.98 | 0.66 | 1.17E-299 |
| IGKV4-1 | 5.93E-298 | 0.278669449 | 0.114 | 0 | 2.00E-293 | 1.01E-69 | 1.332761501 | 0.276 | 0.064 | 3.39E-65 |
| LINC01480 | 7.83E-129 | 0.872979725 | 0.286 | 0.008 | 2.64E-124 | 3.60E-290 | 0.584636399 | 0.227 | 0.009 | 1.21E-285 |
| ITM2C | 6.76E-213 | 1.960339994 | 0.814 | 0.041 | 2.28E-208 | 1.59E-287 | 1.261785131 | 0.755 | 0.14 | 5.35E-283 |
| PRDX4 | 5.19E-61 | 1.818425755 | 0.886 | 0.185 | 1.75E-56 | 7.47E-273 | 1.585687204 | 0.878 | 0.254 | 2.52E-268 |
| KIAA0125 | 9.01E-251 | 0.557164583 | 0.214 | 0.002 | 3.04E-246 | 1.28E-244 | 0.566503253 | 0.188 | 0.007 | 4.32E-240 |
| GNG7 | 4.81E-193 | 1.01991076 | 0.614 | 0.024 | 1.62E-188 | 2.25E-248 | 0.508450702 | 0.439 | 0.051 | 7.58E-244 |
| RAB30 | 7.79E-39 | 0.542765066 | 0.229 | 0.017 | 2.62E-34 | 9.38E-230 | 0.407090377 | 0.298 | 0.025 | 3.16E-225 |
| XBP1 | 1.16E-26 | 1.769282337 | 0.929 | 0.532 | 3.91E-22 | 1.60E-224 | 2.006402945 | 0.951 | 0.459 | 5.38E-220 |
| IGHG3 | 2.84E-224 | 6.100845432 | 0.3 | 0.004 | 9.58E-220 | 2.04E-128 | 7.033631686 | 0.831 | 0.377 | 6.89E-124 |
| DPEP1 | 7.33E-107 | 0.335315837 | 0.1 | 0.001 | 2.47E-102 | 1.95E-212 | 0.276309986 | 0.147 | 0.005 | 6.56E-208 |
| IGHG2 | 3.82E-133 | 6.693241337 | 0.286 | 0.007 | 1.29E-128 | 1.17E-199 | 4.992424241 | 0.375 | 0.05 | 3.96E-195 |
| PAIP2B | 2.16E-99 | 0.528900795 | 0.314 | 0.012 | 7.26E-95 | 3.70E-198 | 0.260567454 | 0.214 | 0.014 | 1.25E-193 |
| BLNK | 2.49E-70 | 0.468084344 | 0.314 | 0.018 | 8.40E-66 | 6.96E-195 | 0.276592036 | 0.253 | 0.021 | 2.34E-190 |
| IGHG4 | 3.11E-102 | 5.187973161 | 0.214 | 0.005 | 1.05E-97 | 4.89E-191 | 6.56113078 | 0.676 | 0.192 | 1.65E-186 |
| PLPP5 | 1.02E-76 | 1.056170711 | 0.686 | 0.076 | 3.44E-72 | 9.31E-186 | 0.618906437 | 0.594 | 0.119 | 3.14E-181 |
| ISG20 | 5.11E-43 | 1.777892919 | 0.9 | 0.245 | 1.72E-38 | 6.08E-184 | 1.012922912 | 0.849 | 0.242 | 2.05E-179 |
| HSH2D | 2.70E-86 | 0.463271379 | 0.414 | 0.025 | 9.08E-82 | 1.96E-176 | 0.266678696 | 0.224 | 0.018 | 6.61E-172 |
| HERPUD1 | 5.10E-28 | 2.339942454 | 0.929 | 0.567 | 1.72E-23 | 1.45E-162 | 1.670127189 | 0.937 | 0.532 | 4.88E-158 |
| IGHG1 | 3.53E-121 | 7.074866578 | 0.414 | 0.018 | 1.19E-116 | 5.08E-160 | 7.299648133 | 0.796 | 0.32 | 1.71E-155 |
| IGKC | 4.23E-61 | 10.14439987 | 0.771 | 0.153 | 1.43E-56 | 6.63E-160 | 7.662713402 | 0.992 | 0.928 | 2.23E-155 |
| CRELD2 | 1.10E-57 | 1.043448364 | 0.814 | 0.135 | 3.72E-53 | 1.04E-153 | 0.738835579 | 0.651 | 0.166 | 3.50E-149 |
| TXNDC11 | 6.33E-33 | 0.769921645 | 0.629 | 0.129 | 2.13E-28 | 6.29E-149 | 0.569502686 | 0.41 | 0.073 | 2.12E-144 |
| SEL1L3 | 5.81E-73 | 0.730784469 | 0.486 | 0.041 | 1.96E-68 | 2.87E-144 | 0.377451937 | 0.345 | 0.053 | 9.66E-140 |
| ERLEC1 | 2.02E-18 | 0.540111817 | 0.686 | 0.21 | 6.80E-14 | 1.34E-142 | 0.75122318 | 0.667 | 0.18 | 4.52E-138 |
| PDK1 | 6.44E-33 | 0.280142176 | 0.271 | 0.027 | 2.17E-28 | 9.20E-137 | 0.255136256 | 0.239 | 0.027 | 3.10E-132 |
| SEL1L | 1.65E-21 | 0.390596759 | 0.514 | 0.114 | 5.57E-17 | 1.28E-133 | 0.47726851 | 0.455 | 0.093 | 4.31E-129 |
| TP53INP1 | 2.05E-75 | 0.692128597 | 0.414 | 0.028 | 6.92E-71 | 4.68E-132 | 0.332844884 | 0.265 | 0.034 | 1.58E-127 |
| CHPF | 3.02E-65 | 0.618721209 | 0.486 | 0.044 | 1.02E-60 | 5.21E-132 | 0.338078482 | 0.337 | 0.054 | 1.76E-127 |
| ST6GAL1 | 1.32E-68 | 0.594227461 | 0.4 | 0.029 | 4.46E-64 | 3.53E-131 | 0.329804975 | 0.3 | 0.044 | 1.19E-126 |
| TXNDC15 | 7.19E-34 | 0.616858704 | 0.7 | 0.145 | 2.42E-29 | 1.18E-128 | 0.61356724 | 0.575 | 0.148 | 3.97E-124 |
| EAF2 | 2.35E-80 | 1.040745595 | 0.6 | 0.056 | 7.91E-76 | 8.90E-128 | 0.278515667 | 0.282 | 0.04 | 3.00E-123 |
| SDF2L1 | 1.53E-40 | 1.530264084 | 0.886 | 0.247 | 5.16E-36 | 4.21E-125 | 0.820137421 | 0.78 | 0.267 | 1.42E-120 |
| FKBP2 | 2.50E-17 | 1.018138342 | 0.886 | 0.436 | 8.42E-13 | 3.16E-123 | 1.11328556 | 0.939 | 0.486 | 1.06E-118 |
| CHST2 | 1.01E-48 | 0.639680398 | 0.329 | 0.027 | 3.39E-44 | 3.53E-109 | 0.307290015 | 0.206 | 0.026 | 1.19E-104 |
| SPCS3 | 1.89E-22 | 1.008028591 | 0.857 | 0.307 | 6.38E-18 | 1.36E-108 | 0.810635082 | 0.763 | 0.283 | 4.57E-104 |
| TOR3A | 1.17E-35 | 0.784790403 | 0.486 | 0.077 | 3.95E-31 | 2.43E-107 | 0.409815833 | 0.414 | 0.093 | 8.19E-103 |
| IGLC2 | 5.30E-102 | 9.318235065 | 0.5 | 0.033 | 1.78E-97 | 1.17E-47 | 7.61663141 | 0.857 | 0.576 | 3.93E-43 |
| ANKRD28 | 1.07E-27 | 1.071357845 | 0.657 | 0.169 | 3.60E-23 | 2.12E-96 | 0.886002802 | 0.71 | 0.263 | 7.14E-92 |
| ERN1 | 1.30E-20 | 0.556492947 | 0.386 | 0.077 | 4.39E-16 | 1.85E-94 | 0.325520983 | 0.308 | 0.061 | 6.22E-90 |
| BTG2 | 3.38E-10 | 0.61990235 | 0.843 | 0.456 | 1.14E-05 | 3.75E-93 | 1.111073025 | 0.859 | 0.426 | 1.26E-88 |
| GMPPB | 1.46E-62 | 0.784452985 | 0.586 | 0.066 | 4.93E-58 | 4.35E-92 | 0.252321903 | 0.343 | 0.074 | 1.47E-87 |
| ST6GALNAC4 | 4.48E-37 | 0.534409835 | 0.471 | 0.068 | 1.51E-32 | 2.26E-83 | 0.258626976 | 0.318 | 0.07 | 7.62E-79 |
| DNAAF1 | 1.74E-13 | 0.714332164 | 0.157 | 0.023 | 5.85E-09 | 3.01E-83 | 0.852870224 | 0.229 | 0.041 | 1.01E-78 |
| IGHM | 1.26E-58 | 8.008897775 | 0.329 | 0.024 | 4.24E-54 | 2.66E-82 | 5.263489833 | 0.363 | 0.099 | 8.96E-78 |
| PRDM1 | 2.82E-17 | 0.534120787 | 0.471 | 0.118 | 9.49E-13 | 1.52E-81 | 0.457372428 | 0.406 | 0.107 | 5.12E-77 |
| LMAN1 | 7.46E-29 | 0.988984018 | 0.743 | 0.198 | 2.51E-24 | 5.87E-81 | 0.538997058 | 0.606 | 0.21 | 1.98E-76 |
| LINC00152 | 5.89E-30 | 0.728424069 | 0.657 | 0.14 | 1.99E-25 | 8.95E-75 | 0.558052259 | 0.669 | 0.254 | 3.01E-70 |
| TRIB1 | 3.24E-09 | 0.406182593 | 0.529 | 0.205 | 0.000109181 | 2.14E-73 | 0.600978492 | 0.582 | 0.211 | 7.20E-69 |
| DNAJB9 | 4.28E-24 | 0.97133886 | 0.814 | 0.264 | 1.44E-19 | 7.09E-73 | 0.494360449 | 0.629 | 0.233 | 2.39E-68 |
| MANF | 1.28E-31 | 1.288928595 | 0.829 | 0.253 | 4.31E-27 | 2.63E-71 | 0.595482367 | 0.747 | 0.321 | 8.85E-67 |
| UBE2J1 | 4.76E-36 | 1.426892837 | 0.871 | 0.254 | 1.61E-31 | 4.45E-71 | 0.443188095 | 0.608 | 0.218 | 1.50E-66 |
| VOPP1 | 7.93E-17 | 0.472485281 | 0.429 | 0.106 | 2.67E-12 | 1.97E-70 | 0.283340233 | 0.402 | 0.114 | 6.65E-66 |
| IGHA1 | 3.12E-68 | 9.341824996 | 0.743 | 0.12 | 1.05E-63 | 1.24E-26 | 6.339101036 | 0.871 | 0.75 | 4.19E-22 |
| IGLC3 | 1.79E-67 | 8.552091031 | 0.371 | 0.027 | 6.03E-63 | 1.75E-49 | 7.227625471 | 0.588 | 0.312 | 5.91E-45 |
| NUCB2 | 3.17E-23 | 0.668102455 | 0.729 | 0.195 | 1.07E-18 | 4.46E-66 | 0.361411908 | 0.643 | 0.245 | 1.50E-61 |
| SSR3 | 1.83E-18 | 1.102019981 | 0.829 | 0.398 | 6.16E-14 | 8.59E-66 | 0.609449211 | 0.765 | 0.351 | 2.89E-61 |
| CMB9-22P13.1 | 3.37E-21 | 0.417191709 | 0.3 | 0.048 | 1.14E-16 | 1.85E-58 | 0.290062144 | 0.184 | 0.036 | 6.23E-54 |
| H1FX | 5.02E-17 | 0.738838168 | 0.5 | 0.135 | 1.69E-12 | 2.63E-53 | 0.63307378 | 0.504 | 0.196 | 8.86E-49 |
| HSP90B1 | 6.79E-23 | 1.85687445 | 0.914 | 0.574 | 2.29E-18 | 1.14E-49 | 0.857161514 | 0.918 | 0.581 | 3.85E-45 |
| PDIA4 | 2.03E-32 | 1.390691705 | 0.771 | 0.222 | 6.85E-28 | 6.10E-45 | 0.385935584 | 0.535 | 0.223 | 2.06E-40 |
| MYDGF | 5.95E-25 | 1.558898521 | 0.914 | 0.426 | 2.01E-20 | 3.99E-36 | 0.466463503 | 0.792 | 0.419 | 1.35E-31 |
| VIMP | 4.85E-15 | 0.843378817 | 0.814 | 0.39 | 1.63E-10 | 2.63E-32 | 0.373443719 | 0.824 | 0.456 | 8.85E-28 |
| SPCS1 | 7.81E-20 | 1.085509043 | 0.929 | 0.519 | 2.63E-15 | 2.93E-32 | 0.416008759 | 0.825 | 0.507 | 9.86E-28 |
| SPCS2 | 1.30E-20 | 1.176636457 | 0.886 | 0.534 | 4.39E-16 | 4.43E-32 | 0.427173342 | 0.863 | 0.556 | 1.49E-27 |
| ANKRD37 | 8.26E-17 | 0.767557509 | 0.429 | 0.106 | 2.78E-12 | 2.84E-24 | 0.251294611 | 0.306 | 0.134 | 9.58E-20 |
| PDIA6 | 6.05E-22 | 1.16341753 | 0.886 | 0.397 | 2.04E-17 | 1.01E-21 | 0.250338944 | 0.735 | 0.409 | 3.40E-17 |
| RRBP1 | 7.36E-12 | 0.541467731 | 0.7 | 0.278 | 2.48E-07 | 5.96E-18 | 0.267533572 | 0.618 | 0.344 | 2.01E-13 |

**Supplementary Table 2. A total of 44 hub genes with high connectivity in the yellowgreen module.**

| **Gene symbol** | **Module** | **MM-R** | **MM-*P* value** | **GS-R** | **GS-*P* value** |
| --- | --- | --- | --- | --- | --- |
| AL121845.2 | yellowgreen | 0.742451292 | 2.40E-37 | 0.263309636 | 0.000131353 |
| BHLHA15 | yellowgreen | 0.815570273 | 2.33E-50 | 0.418786026 | 3.74E-10 |
| BLNK | yellowgreen | 0.822180916 | 8.10E-52 | 0.385599429 | 1.04287E-08 |
| CCR7 | yellowgreen | 0.744379744 | 1.25E-37 | 0.448897256 | 1.31E-11 |
| CD27 | yellowgreen | 0.867260632 | 1.04E-63 | 0.535408961 | 1.11915E-16 |
| CD79A | yellowgreen | 0.861980762 | 4.18E-62 | 0.42282352 | 2.43E-10 |
| CD79B | yellowgreen | 0.871324954 | 5.41E-65 | 0.446177328 | 1.80049E-11 |
| CPNE5 | yellowgreen | 0.933090508 | 1.49E-92 | 0.581276549 | 5.17E-20 |
| CXCL13 | yellowgreen | 0.782542615 | 7.41E-44 | 0.385063408 | 1.10E-08 |
| DERL3 | yellowgreen | 0.866786809 | 1.46E-63 | 0.553999032 | 5.73684E-18 |
| DPEP1 | yellowgreen | 0.755797723 | 2.26E-39 | 0.558568962 | 2.69E-18 |
| FCMR | yellowgreen | 0.7753308 | 1.38E-42 | 0.370110362 | 4.36E-08 |
| FKBP11 | yellowgreen | 0.8827837 | 7.35E-69 | 0.534306772 | 1.32713E-16 |
| FUT8 | yellowgreen | 0.757518321 | 1.21E-39 | 0.519570526 | 1.22E-15 |
| HERPUD1 | yellowgreen | 0.757266694 | 1.33E-39 | 0.260731456 | 0.000153641 |
| HLA-DOB | yellowgreen | 0.745855173 | 7.51E-38 | 0.320821297 | 2.58E-06 |
| IGLL5 | yellowgreen | 0.857327472 | 9.59E-61 | 0.494206255 | 4.38E-14 |
| JCHAIN | yellowgreen | 0.757038178 | 1.44E-39 | 0.486976562 | 1.15229E-13 |
| JSRP1 | yellowgreen | 0.871883539 | 3.58E-65 | 0.452397765 | 8.70E-12 |
| LAX1 | yellowgreen | 0.907678143 | 7.26E-79 | 0.434214257 | 7.00E-11 |
| MEI1 | yellowgreen | 0.85379049 | 9.64E-60 | 0.444029976 | 2.31E-11 |
| MS4A1 | yellowgreen | 0.733533899 | 4.63E-36 | 0.363734534 | 7.69993E-08 |
| MZB1 | yellowgreen | 0.923582459 | 7.01E-87 | 0.526033354 | 4.67774E-16 |
| PIM2 | yellowgreen | 0.913614589 | 1.13E-81 | 0.49813934 | 2.56377E-14 |
| PNOC | yellowgreen | 0.927096135 | 6.92E-89 | 0.500191615 | 1.93321E-14 |
| RHOH | yellowgreen | 0.76687976 | 3.70E-41 | 0.270050585 | 8.65301E-05 |
| SEC11C | yellowgreen | 0.796690362 | 1.71E-46 | 0.422250078 | 2.59E-10 |
| SEL1L3 | yellowgreen | 0.877707735 | 4.24E-67 | 0.577167869 | 1.08E-19 |
| SIRPG | yellowgreen | 0.724559729 | 8.10E-35 | 0.330267291 | 1.25E-06 |
| SLAMF7 | yellowgreen | 0.843955552 | 4.34E-57 | 0.377963006 | 2.13197E-08 |
| SLC17A9 | yellowgreen | 0.723953753 | 9.79E-35 | 0.505420667 | 9.33615E-15 |
| SPAG4 | yellowgreen | 0.871239104 | 5.77E-65 | 0.506759167 | 7.73E-15 |
| SPATS2 | yellowgreen | 0.7060265 | 2.12E-32 | 0.42114518 | 2.9114E-10 |
| SSR4 | yellowgreen | 0.913645672 | 1.09E-81 | 0.507023023 | 7.45103E-15 |
| ST6GAL1 | yellowgreen | 0.808663779 | 6.78E-49 | 0.583082357 | 3.73E-20 |
| STARD5 | yellowgreen | 0.806230133 | 2.15E-48 | 0.592373448 | 6.69E-21 |
| TCF3 | yellowgreen | 0.710953247 | 5.03E-33 | 0.356146102 | 1.49E-07 |
| TNFRSF13B | yellowgreen | 0.735693581 | 2.29E-36 | 0.395807925 | 3.89E-09 |
| TNFRSF18 | yellowgreen | 0.808773275 | 6.44E-49 | 0.468123144 | 1.29E-12 |
| TP53INP1 | yellowgreen | 0.726546436 | 4.34E-35 | 0.346141184 | 3.46E-07 |
| TXNDC5 | yellowgreen | 0.877532843 | 4.86E-67 | 0.552318148 | 7.5622E-18 |
| VOPP1 | yellowgreen | 0.765310535 | 6.72E-41 | 0.263291426 | 1.31E-04 |
| XBP1 | yellowgreen | 0.83143235 | 5.77E-54 | 0.458571698 | 4.16E-12 |
| ZBP1 | yellowgreen | 0.805616763 | 2.87302E-48 | 0.306883125 | 7.23912E-06 |

**Supplementary Table 3**. **The efficacy of XGBoost model in the training and testing sets.**

| **Schemes** | **AUC (95% CI)** | **Sensitivity(%)** | **Specificity(%)** | **Accuracy(%)** | **F1 score** |
| --- | --- | --- | --- | --- | --- |
| Training set | 0.9999 (0.9998-1) | 1.000 | 0.9919 | 0.9960 | 0.9960 |
| Testing set | 0.973 (0.9371-1) | 0.9615 | 0.9423 | 0.9519 | 0.9523 |

The sensitivity, specificity, accuracy and F1 score were calculated using Youden’s index.

**Supplementary Table 4. The immune infiltration analysis of ESTIMATE algorithm in pan-cancer.**

| **Cohort** | **ImmuneScore R** | **ImmuneScore P** |
| --- | --- | --- |
| TARGET-WT(N=80) | -0.528587358 | 4.66E-07 |
| TCGA-TGCT(N=132) | 0.050714099 | 0.56360807 |
| TCGA-LIHC(N=363) | -0.133123833 | 0.011119787 |
| TCGA-ESCA(N=181) | 0.293765448 | 5.98E-05 |
| TCGA-UCEC(N=178) | -0.212387765 | 0.00442461 |
| TCGA-KIRC(N=528) | 0.060439873 | 0.165509134 |
| TCGA-CESC(N=291) | -0.060726211 | 0.301881948 |
| TCGA-COADREAD(N=373) | 0.032692823 | 0.529052957 |
| TCGA-COAD(N=282) | 0.023257197 | 0.697370362 |
| TARGET-LAML(N=142) | 0.310541842 | 0.000169065 |
| TCGA-STAD(N=388) | 0.228245842 | 5.59E-06 |
| TCGA-LUAD(N=500) | 0.147497846 | 0.000939622 |
| TCGA-SARC(N=258) | 0.307710899 | 4.62E-07 |
| TCGA-SKCM-M(N=351) | 0.196646865 | 0.000209483 |
| TCGA-THYM(N=118) | 0.20107489 | 0.029011418 |
| TCGA-PRAD(N=495) | 0.001859539 | 0.96708259 |
| TCGA-SKCM(N=452) | 0.196190286 | 2.66E-05 |
| TCGA-STES(N=569) | 0.321134208 | 4.08E-15 |
| TCGA-GBM(N=152) | 0.434215131 | 2.28E-08 |
| TCGA-KIPAN(N=878) | 0.164842376 | 9.06E-07 |
| TCGA-BRCA(N=1077) | 0.371263422 | 1.56E-36 |
| TCGA-KIRP(N=285) | 0.235552148 | 5.93E-05 |
| TCGA-LAML(N=214) | 0.135254533 | 0.048142924 |
| TCGA-SKCM-P(N=101) | -0.028548343 | 0.776874943 |
| TCGA-GBMLGG(N=656) | 0.45585508 | 5.64E-35 |
| TCGA-HNSC(N=517) | 0.46565756 | 3.48E-29 |
| TCGA-LUSC(N=491) | 0.478438946 | 1.87E-29 |
| TCGA-THCA(N=503) | 0.019196354 | 0.667561008 |
| TARGET-NB(N=153) | 0.124884478 | 0.124025274 |
| TCGA-MESO(N=85) | 0.04253693 | 0.699097137 |
| TCGA-READ(N=91) | 0.099637046 | 0.347382467 |
| TCGA-OV(N=417) | 0.003940801 | 0.93605259 |
| TCGA-UVM(N=79) | 0.097142429 | 0.394394326 |
| TCGA-PAAD(N=177) | 0.542807058 | 5.96E-15 |
| TCGA-BLCA(N=405) | 0.494046966 | 2.60E-26 |
| TCGA-UCS(N=56) | 0.083947284 | 0.538473827 |
| TCGA-LGG(N=504) | 0.593491847 | 2.77E-49 |
| TARGET-ALL(N=86) | 0.11325935 | 0.299130419 |
| TCGA-PCPG(N=177) | 0.513703192 | 2.63E-13 |
| TCGA-ACC(N=77) | -0.154731761 | 0.179056536 |
| TARGET-ALL-R(N=99) | 0.161550164 | 0.110153892 |
| TCGA-DLBC(N=46) | 0.234236315 | 0.117153618 |
| TCGA-KICH(N=65) | -0.181884908 | 0.147037244 |
| TCGA-CHOL(N=36) | -0.070200731 | 0.684124084 |

# Supplementary Methods

**Signature generated from machine learning based integrative approaches**

To develop a concordance plasma cells-related gene signature (PCRGS) with high accuracy and stability performance, we integrated 10 machine learning algorithms including random survival forest (RSF), elastic network (Enet), Lasso, Ridge, stepwise Cox, CoxBoost, partial least squares regression for Cox (plsRcox), supervised principal components (SuperPC), generalized boosted regression modeling (GBM), and survival support vector machine (survival-SVM). A few algorithms possessed the ability of feature selection, such as Lasso, stepwise Cox, CoxBoost, and RSF. Thus, we combined these algorithms to generate a consensus model. In total, 101 algorithm combinations were conducted to fit prediction models based on the 10-fold cross-validation framework. The initial signature discovery was performed in the GSE70866 dataset. The RSF model was implemented via the *randomForestSRC* R package. RSF had two parameters ntree and mtry, where ntree represented the number of trees in the forest and mtry was the number of randomly selected variables for splitting at each node. The ntree was set as 1000 and a grid-search was utilized on mtry to find the optimal nodesize tuning parameter. Based on the determined nodesize, all the pairs of (ntree, mtry) are formed and the one with the best C-index value is identified as the optimized parameters. The Enet, Lasso, and Ridge were implemented via the *glmnet* R package. The regularization parameter, λ, was determined by 10-fold cross-validation, whereas the L1-L2 trade-off parameter, α, was set to 0-1 (interval =0.1). The stepwise Cox model was implemented via *survival* R package. A stepwise algorithm using the Akaike information criterion was applied, and the direction mode of stepwise search was set to "both", "backward", and "forward", respectively. The CoxBoost model was implemented via *CoxBoost* R package, which is used to fit a Cox proportional hazards model by componentwise likelihood-based boosting. For the CoxBoost model, we used 10-fold cross-validation routine optimCoxBoostPenalty function to first determine the optimal penalty (amount of shrinkage). Once this parameter was determined, the other tuning parameter of the algorithm, namely, the number of boosting steps to perform, was selected via the function cv.CoxBoost. The dimension of the selected multivariate Cox model was finally set by the principal routine CoxBoost. The plsRcox model was implemented via *plsRcox* R package. The cv.plsRcox function was used to determine the number of components requested, and the plsRcox function was applied to fit a partial least squares regression generalized linear model. The SuperPC model was implemented via *superpc* R package, is a generalization of principal component analysis, which generates a linear combination of the features or variables of interest that capture the directions of largest variation in a dataset. The superpc.cv function used the10-fold cross-validation framework to estimate the optimal feature threshold in supervised principal components. To avoid problems with fitting Cox models to small validation datasets, it uses the "pre-validation" approach. The GBM model was implemented via *gbm* R package. Using the 10-fold cross-validation, the cv.gbm function selected index for number trees with minimum cross-validation error. The gbm function was used to fit the generalized boosted regression model. The survival-SVM model was implemented via *survivalsvm* package. The regression approach takes censoring into account when formulating the inequality constraints of the support vector problem.

**Predictive model hyperparameters**

For the XGBoost models, we used the gbtree booster and a binary-logistic loss function, and no sub-sampling. We also had eta = 0.2, gamma = 2.220446e-16, nrounds = 100, max depth = 2, min child weight = 1, and colsample-bytree = 1. Other hyperparameters were set to their default values.

**Preparation of 2.5% Avertin**

10 g tribromoethanol and 10 ml tertiary amyl alcohol were added into a 15 ml centrifuge tube. Then, the tube was shook in the hand until tribromoethanol was completely dissolved. When the solution became transparent, it was filtered with a 0.22 μm membrane to obtain 100% Avertin. Finally, we diluted 100% Avertin to 2.5% with physiological saline (0.9% NaCl) or diluent (1:40).
